# Supplementary material for: Draft Genome Sequence, and a Sequence-Defined Genetic Linkage Map of the Legume Crop Species Lupinus angustifolius L
Source: PLoS One. 2013 May 29;8(5):e64799. doi: 10.1371/journal.pone.0064799 (PMC3667174; doi:10.1371/journal.pone.0064799)
Supplement: Table S2 — Genetic linkage map of Lupinus angustifolius constructed based on 8,246 sequence-defined molecular markers. SNP markers are named with a prefix of “DAFWA”; and indel markers are named with a prefix of “iDAFWA”. The first nucleotides of the SNPs in parentheses in the RAD reads were from Unicrop, the second nucleotides in parentheses were from Tanjil. The numbers following ":" after scaffold names indicate the nucleotide positions of the SNP markers in the scaffold sequences. The insertion/deletion nucleotides of indel markers are noted after the scaffold names. (XLSX) [file pone.0064799.s005.xlsx]

## Sheet: Sheet1
Table S2 Genetic linkage map of Lupinus angustifolius constructed on 8,246 sequence-defined molelcular markers and three genes of agronmic interest. The first nucleotides of the SNPs in parentheses in the RAD reads were from Unicrop, the second nucleotides in parentheses were from Tanjil. The numbers following ":" after scaffold names indicate the nucleotide positions of the SNP markers in the sc…
Likange group	Marker name	Distance	SNP position	RAD tag sequences	Scaffold : marker position	sacffold_size
SLG-1	DAFWA2709	#	53	AATTCTCAGCATTATTACATAACAAAACAGAGAATAAGATATTATTCATATA[G/A]GATGATTTTGATTATGCTTATCTTCACAAAATAGTCCAT	scaffold90443:10794	22939
SLG-1	DAFWA3014	2.383	60	AATTCATTAGACAATATAAATTTATTGGCCTCAGCTCCATTCACAACCACAGTTGGAGA[T/C]CCCATTATCCTTGTTTTGAAGATCTTCCCATG	scaffold15138:17225	81714
SLG-1	DAFWA8134	0.747	51	AATTCCATTGGGTATGTGATCATTATCATAAGTTTGTTAAAATTAATATG[C/T]ATATTACATCAGTAATAAACACTAACATTTTTATTTTCAGT	scaffold15138:32448	81714
SLG-1	DAFWA7823	9.195	81	AATTCTATCATCGATAAATATGAACTCGGAAGAAACGATTGGCTTCAGTCATTGTACAATGCTCGTGCTCAATGGGTTCC[A/T]GCGTATTTCCG	scaffold93694:18439	21110
SLG-1	DAFWA6573	0	12	AATTCAATGAT[A/T]GTTTTTGGATTCAATTCTACTTAATACTTTGTTATATCCAAATGCAAGCCACAAACTTATTGATGGTCTTTTAGTGCATG	C28753026:7346	11060
SLG-1	DAFWA3950	0.718	57	AATTCAGTATCCCCTGAAGAATCTGTAGCCATTTTATGCAATTTAATTCCCGACAA[G/C]GCTGATTCTGACGGCGCCTGATTCTCACCAAAAGC	scaffold93481:15473	26283
SLG-1	iDAFWA488	0.717	48	AATTCTTAATCTCTCCTGTAATAATGGTCAGAGTGAATATCTTCGAGAAATGTTCGAATCTAAAACATTTGTAATATAGTGAAGTGAATTTC-AATTCTTAATCTCTCCTGTAATAATGGTCAGAGTGAATATCTTCGAGATTTCACTACAAATGTTCGAATCTAAAGCATTTGTAATATAGTGA	scaffold89458:3132-TTTCACTACA-d10	19629
SLG-1	DAFWA6831	0	90	AATTCAATGTGCAATCATATCAGTATCAATCCACGCCGATTAAAGTGTCAATTAAACAACAACAACACCAAAAAGTGAGATAGTGCATT[T/A]TT	scaffold44253:19889	28644
SLG-1	DAFWA6366	0	14	AATTCCTCAGTAT[T/A]CACAGAGGCTCATTCTTTGACGAAATCTAATGCTACACAATATTCAGATTCCACAATCCACATTGTATTTTCTAGTGA	scaffold44253:9896	28644
SLG-1	DAFWA4617	0	37	AATTCATTTATATGTTCGTCAACTCATCCGATTCAA[T/A]TTTTTTTTTAATGCAGAAACTCAGACTTGAATTAGCAATTCTATAAGTACCTCAG	scaffold44253:5627	28644
SLG-1	DAFWA8397	0	20	AATTCCTATAAATAGCACA[C/T]ACCCACCTTACTAATTTATTTGCATAACAAAATACAAACTAAGGTTATTAAAGTTATACTTGAGAAAATGGA	scaffold44253:20381	28644
SLG-1	DAFWA3117	0	12	AATTCTCTACT[T/C]TGGCATTGGTTAGACTCATCTGGAAGGTAACCCCACAATCATTTACTGTAAGTGATTTCTTAGAAGCTAATGCAATTCTA	scaffold44253:20190	28644
SLG-1	DAFWA4765	0	62	AATTCAAAATAATTTAATTTGGTTATGTTTCAATTTTAAGAAGTTGATTATTTAGGTTATA[T/A]TTCTAATTCTAAAATGAGTTCCAAACATGA	scaffold89458:3027	19629
SLG-1	DAFWA353	0	81	AATTCAATCACGTAATTTGATTTTGACATAATGGCCTAAGTAATTAATACGCATGCATATGATTCATCATGATGCCTAAA[A/C]CTAATCAAATA	scaffold44253:20278	28644
SLG-1	DAFWA1245	0	67	AATTCTTTGGAGGGATGAGAATATTATTTTTTCTTTTAGTTTTAAGAATAAAAGTGTTTTATTATT[A/G]AAAATAAAAGAATGTAAGTGTTATT	scaffold89458:15052	19629
SLG-1	iDAFWA623	0	65	AATTCCAAAGTCATTTGGGAGCATATGTGCCTTAGGCTCACTAGACCTGTATAGCAACATATGTTGAGAGAAAAGCTTTCTGTGATAATTCA-AATTCCAAAGTCATTTGGGAGCATATGTGCCTTAGGCTCACTAGACCTGTATAGCAACATATGTTAGAGAGAAGAGCTTTCTGTGATAATTC	scaffold89458:6426-A-d1	19629
SLG-1	DAFWA8414	1.453	49	AATTCATATACACCTCTGTTGGGATACTAATGCATCAGAAAAAGTATG[C/T]CAAAGACTTGTTGTAGAGGTTCAACATGAGCTCATGTAATCCA	scaffold65328:6938	11190
SLG-1	DAFWA2655	0	51	AATTCTATGGTCAAGAAACAAATTTACTTTGCTTAGTATAGTAAAAAATG[G/A]GGTGAAAAGTGAAATATTTACTCAAATAATGATACTGTAGC	scaffold77819:31558	41640
SLG-1	DAFWA817	0	43	AATTCTATGAACCAAAACGCATCATAAGAATTAAGAACCAAA[C/T]AACACACGGATTCGAATCAGAAATTAAAATAATAAAAATAAAAATGGGA	scaffold97099:14786	15733
SLG-1	DAFWA7586	0	47	AATTCAGAACCAAAGGCCATAACACAAAAAAGTAGGCTAACAAAAA[A/T]GTCCCAAAATGGGATAATATATAGATGAGTGCTAGAGAGTCGTCT	scaffold97099:4784	15733
SLG-1	iDAFWA41	0	50	AATTCTCTTAAAGGATCGAAAACGGAATCAATGGCGTCCATTCTCTCTTTTGAGCTTTTGAATCTGAATTGAGTTATAGATTATTATTTTTT-AATTCTCTTAAAGGATCGAAAACGGAATCAATGGCGTCCATTCTCTCTTTGAGCTTTTGAATCTGAATTGAGTTATAGATTATTATTTTTTG	scaffold97099:14964-T-i1	15733
SLG-1	DAFWA3348	0.718	84	AATTCTGTTAGTAGCATGTAGTGACTGAGGCAATTGATTGTAATCTTAGCTTCTCTATGTTGAGACATAACCTGGACAAAATC[C/G]CAATATAC	scaffold77819:24209	41640
SLG-1	DAFWA5013	0	57	AATTCAAACAGTCATATAGCTGATGAGAGACTTCAATTCTCTCTCACATATCACCA[G/C]CTTGAAGGTGTTCTTCAATTCAATTACAAAGTCAT	scaffold77819:18373	41640
SLG-1	DAFWA1629	0	92	AATTCATTGCCCATTTTAACATAGATGCATGTTAATAAATAAAAATAATGAAGATATAAGTGGCTCCAAAAACATATTTTTATCTAACCTT[C/A]	scaffold77819:20930	41640
SLG-1	DAFWA1624	0	76	AATTCTTAGTGAATGCAATTTCTGTTGGTGAAAAAGCTAAACTTTAAAGCTATATTCCATTTGATCGGAGAATTA[T/G]GAACTGGATTTACGTA	scaffold77819:16582	41640
SLG-1	DAFWA5581	2.207	51	AATTCTTATGATATTATAAAAATGATATTCCGAGGGTGAAAAGATGAATC[T/A]TAAAAATTCTAGAACTAGTAAAAAACGGAGGAGAAAAAAGT	scaffold47353:32297	32788
SLG-1	DAFWA1172	0	85	AATTCTTTTATTTGGGTCAATAGTGTGATAACCACAGCAGAAAATGGGGTGTAGATTATACCATCAAACCACATAGTAGATGAA[G/A]TCCACTA	scaffold47353:10655	32788
SLG-1	DAFWA8184	0	77	AATTCTTTTGTGTTGTTTCTAATGGTTGAATGGGTAAATTTTGAATAATAGCTTTATAATAGGATTACATAGTCTC[T/C]CTATCCCGACGAAAT	scaffold47353:26579	32788
SLG-1	iDAFWA202	2.98	34	AATTCTGCTTTGCATTGGATCTAGAACAAAAAAAAGAGAGATAATTAATTCACCAAAGTTACAACTTACAACACCAAAAGGGTAAGAAAATG-AATTCTGCTTTGCATTGGATCTAGAACAAAAAAAGAGAGAGATAATTAATTCACCAAAGTTACAACTTACAACACCAAAAGGGTAAGAAAAT	scaffold84715:20524-G-d1	21658
SLG-1	iDAFWA436	0	48	AATTCAGTTGTACATTCAGGTGCTGAACAAATGAAACCATGACATTCTTGGAACTTTTAATTTCCCATGCATGAAGATTTTCTGTAGTGAAG-AATTCAGTTGTACATTCAGGTGCTGAACAAATGAAACCATGACATTCTGAATTGGAACTTTTAATTTCCCATGCATGAAGATTTTCTGTAGT	scaffold84715:15597-GAAT-d4	21658
SLG-1	DAFWA4351	0.717	58	AATTCAAAATGACACTACTCTTTATGAAAAACATGAATTTCTTATAAATAAATAGTT[A/C]TGATTCCTAGTTGTAGATATATAAGACAACATAA	scaffold89974:1620	3019
SLG-1	DAFWA7818	0	69	AATTCTGCTTTGCCTAATGCTCCCAAATTTAAGATCAACAGCTTTGGAGTTTGCCCTGGTAGCATGCA[G/C]AACTACATACCTTGTTTGGAGAG	scaffold67556:1732	23653
SLG-1	DAFWA6810	0	60	AATTCCAGGACTGCATGATTGAGCATGAAATCGCAATCCTTTATTTGACAATTTCGATT[T/G]CACTTGTTTTCTTACACACGACAAATAATCAT	scaffold67556:8984	23653
SLG-1	DAFWA8141	0	24	AATTCAGAATAAAAACAAAAGTA[A/G]AACGACATTGTTAGAATGAGAATGATCTTAACACAAATAAACGGTTGACGATCCGAAAATGGAGAATT	scaffold84123:19633	22725
SLG-1	DAFWA8188	0	73	AATTCTTTATTGTATCTGCTCTGGGAAGTTCCATTTGTCATTTCTTTTCTACCAGGTAAATTATCCTATTTT[T/G]TGTGTGATTATATTGTGCA	scaffold84123:9771	22725
SLG-1	DAFWA7902	0.718	18	AATTCAACCAGCAAAAA[G/A]ACATGACATTAATACCTTTATTTAAATAATTACAGAAAATTAAAAAAGCATGCTTTGCGGACCTTCATGGTTTT	scaffold71773:6466	9625
SLG-1	DAFWA8299	0	81	AATTCAAAGTTGGTCAGAAAATAAATCACATCCCTCTAGATTTTTATCTTGTGTTAACAAATACGGTTGCTCAACACCCT[A/C]GTTGATCCTCA	scaffold93689:13389	19514
SLG-1	DAFWA8291	0.718	86	AATTCAAAATCGAAAATCAATAGCAAATGCCTTTTCAAAATTGAAACTAAAGCAAAACAGAACACCCCCACTCAGTTCTTTGACG[A/C]ACAGAA	scaffold83174:17241	30714
SLG-1	DAFWA3682	1.453	28	AATTCTTTGTACTCGTCTCTAATAGAG[A/G]ATTTAAAGGAAATCAATATCATTCCATGTTTCAATCTATTTAATGAATACTGAATTTTTTCCAT	scaffold86391:5307	8669
SLG-1	DAFWA8840	0	47	AATTCTTAATGATACAGGACTATACTTTGTAAGCAGATCATGTTCT[T/C]ACCCTCAAGACTCTATTTACAAGTTAGAACTTTGTGGCCTATTAT	scaffold47991:6033	12423
SLG-1	DAFWA8242	0	32	AATTCTTTGCCAGTTCACAATTTTCTAACAC[G/A]TGTTAGAAAAAATGGGCAGTAGTGGAAGCACATTTCAAACAAAAATAGGATAAGATCAAA	scaffold97712:15383	32114
SLG-1	DAFWA7322	0	20	AATTCGAGGAAGAGAGGGC[A/G]TCCATTCTATATCAGCTCAAAGCATTGGAGGAAAAGATTATTAGCATGGAAGATAATGATGAATTTCTTGAA	scaffold97712:24168	32114
SLG-1	DAFWA3887	0	92	AATTCTTTTGAGCACAACTATTTTCACTAATTTAACATGGGAGTGGCCAGTAAGTTAAAAATATAGATAAATTATTCCAGACCAAATTGGA[T/C]	scaffold97712:3180	32114
SLG-1	DAFWA7015	0	64	AATTCATATAGTTTGAAAGTGGTTATTGGATAGCTTTTGAAGCTACTTCACATGGCTATTTCT[A/C]ATTTTCAAGCTACTTCATTTGGTTTCAT	scaffold68037:19523	19954
SLG-1	DAFWA6525	0	62	AATTCAAATCCTATAAACATTATCTTCATTTGCAGAGGTAAAATTGTATATATATTATTCT[T/C]AAATCTCTCTAATTAGGAGTCTCGTATATT	scaffold88620:1385	3823
SLG-1	DAFWA2911	0	43	AATTCACACACATGCTTTTCATATTTGTAATATAGGTGTGGG[G/A]CATGAAATATGAGTCTGGAGTTCATATCCACTAAAGAACACTCTCTCCC	scaffold68037:18052	19954
SLG-1	DAFWA2458	0	65	AATTCTAATTATCTGGTTTATTTTCCTTTTTCATTTACAAATTACAATTTTAGGTATTAAAATA[T/G]TAGTAATTTTAAATAAAAAACAATTGG	scaffold51058:12445	17699
SLG-1	DAFWA3151	0	78	AATTCCACCTTTCCAGGTCCACATGCCCAATCTAGTGCGGCCTGCAGCATCTCCGGGTCAGCACCATCCTTTGCAAC[T/G]CAGAAAATTGTATC	scaffold47991:9399	12423
SLG-1	DAFWA7095	0	33	AATTCCAAAACCTGGAATATATTATGTACATT[C/G]ATACTCATTTTGTATGTGCAACAGTTTTGTTTGTCGTCTTGTCTTATTATGGCCATAAA	scaffold86391:4740	8669
SLG-1	iDAFWA762	2.207	52	AATTCAAACCTTAACAATTTTAAAATTTTCTCATTAACGTCCACATAAAAAAACTTTATCTATAAAAATGTAATTATATTTAACAAGAAGAT-AATTCAAACCTTAACAATTTTAAAATTTTCTCACTAACGTCCATATAAAAAACTTTATCTATAAAAATGTAATTATATTTAACAAGAAGATA	scaffold59714:6648-A-i1	11551
SLG-1	DAFWA2533	0	79	AATTCCTAGAAGGGATAATGGAGGGGAAGAGGTTATTAGACTCGGTGGTTCTACTTGGAAGTATTGAGAGACGTAATC[G/T]AATGCTTGCATCA	scaffold66939:23407	24999
SLG-1	DAFWA2927	0	64	AATTCAATATTTGATTTATAAGACAGGGTTATAGCTAATGTAGAAAATATTCTATTCAGTTTG[A/G]TGTTACTATTATATATCTAAATGATTAT	scaffold68591:7802	17236
SLG-1	DAFWA3466	0	43	AATTCACGAGGACTTGTTTGATATTCTTTTAATTAGCAAACT[A/T]ATTAAATTTGAGTTGCAAATTATTTTGATTTAGTGAAAGTATTAAAATT	scaffold81903:1028	1174
SLG-1	DAFWA4793	0	46	AATTCTTAACTTCATTTTCATTCACGGGTTGCATAATAGTTCCAA[A/C]CCCATCAACCTTAACAACAAAGTAGCAATACCCTTGTTCCCAAAAT	scaffold66939:8389	24999
SLG-1	DAFWA2966	0	73	AATTCAACTACACATATCAATTTGGTTGAATAAACTTAAACATCATAATCATTTAGATATATAATAGTAACA[T/C]CAAACTGAATAGAATATTT	scaffold68591:7802	17236
SLG-1	DAFWA6994	0	86	AATTCTTGATAAAGGAGTAAATTAGATGGACAATAACCCAATATAGGTTGAAGTAGATGGATTTACCCCTATAGAGAAAAAATCA[G/T]TAGGAA	scaffold66939:2692	24999
SLG-1	DAFWA1330	0	60	AATTCAACTAAGTGACTTTCAATTGTAAATATATCAGCAATTTTAGTATATTGACTACT[A/G]CTCTTGTTTTGCACAATATTTTAAGAAGCTGG	scaffold59714:6985	11551
SLG-1	DAFWA5337	0	86	AATTCAGTGGTAATACAAGTATTGAGTTATAATCATAATTTTGTTATCAACAAGTATAATGTCATAATCAAGATTCATAAATTTA[T/G]TATCCT	scaffold68591:7947	17236
SLG-1	DAFWA7429	0	74	AATTCATTAACAGATACCCCATAAGCATGACCCACATATAAATACTTGAAAATAAAAATAGGATACACATCAC[A/G]TGGACCTTGAATAAGGAT	scaffold94654:3097	8175
SLG-1	DAFWA4335	0	53	AATTCCTAAAAGGGATAATCGAATGCTTGCCCTTTTATTTGTCTTAGTTAAC[G/A]TAAGTTATAGAATGATGAATGCTGCTGCTTGTATCAGCA	scaffold66939:23524	24999
SLG-1	DAFWA2967	0	21	AATTCGAGACTACCATGCTT[C/A]CATTGATTTGTTACAATATTTTCCCGACATCTTGTTCAGCACCAAAAGTTAACGATAATAAAGTTTGTATT	scaffold66939:23667	24999
SLG-1	iDAFWA100	2.206	31	AATTCCCAAAATAGCACGTTTCATAAAAAAAATATTTCTTTCCAAAATCCTATATATAATACTTACTTTTTATGATTTTTGTAATGAACCTA-AATTCCCAAAATAGCACGTTTCATAAAAAAATATATTTCTTTCCAAAATCCTATATATAATACTTACTTTTTATGATTTTTGTAATGAACCT	scaffold80192:37301-T-d1	39168
SLG-1	DAFWA570	0	40	AATTCATCTTAAAATAATTGACATTATCTAACTGAACAT[C/A]TGTTATTTTATATTTTGTGTCATTCTATATATCATAATTTGTAGATTTATGA	scaffold48652:11254	27092
SLG-1	DAFWA4979	0	92	AATTCCTTTGTGTTCACTGCAACAACTTAAAAACTGATTACTTGGGAATATTTACTCTATCAGTATCACAGATGATACTAACACTCTTTTT[T/C]	scaffold6784:12588	25774
SLG-1	DAFWA503	0	64	AATTCTAAGACTTGAGCCAAGTGCTTGAACTTGATGATTGGACAAGAGAGTTATTTTGATCTC[T/A]TTTTGCACTTGAAACTCTGTAGTTAATA	scaffold78384:3713	5412
SLG-1	DAFWA4183	0	17	AATTCCAAGATTATTT[A/G]AAATAGGTTTTTGCTAAAAAAAGTGAAACTTTTGGTAGTAATGTGCCTGATTGAGTTGGCATCAATAGAGCAACA	scaffold88975:1507	3575
SLG-1	DAFWA4263	0.718	20	AATTCATCAACATTTGAAC[C/T]CAAACATGAACCTAGACCCGATAAAATATAATGCATACAAATTATTGATAAAGTCTTCTCAATATTAATTAT	scaffold77347:17639	26009
SLG-1	DAFWA8095	0	74	AATTCGCTGCATGAAGTTATTCACACAAAAACCTTAGATGCATCCTATTGATAGTAAGATAGACAAATCAAAT[G/A]CAAAACCACTTTATAGGG	scaffold77347:7776	26009
SLG-1	iDAFWA331	0	17	AATTCTTTCATTTTTTTCTTCTCAATTTTGACCGGCTCCCCTCCAATTTTGGGAGGATTGTAATTCCATCTGTTCATTAGTATTTACTTCTT-AATTCTTTCATTTTTTTTCTTCTCAATTTTGACCGGCTCCCCTCCAATTTTGGGAGGATTGTAATTCCATCTGTTCATTAGTATTTACTTCT	scaffold77347:11077-T-d1	26009
SLG-1	DAFWA4449	1.453	81	AATTCAGAGCACCTCTAATTCATCATAACTCTGGATTTTTGCTTCAGTGCCTGAAGTGCACAACTTGTCTCAATATGAGT[T/C]CTAATGAAATG	scaffold50845:4791	14036
SLG-1	iDAFWA219	0.378	17	AATTCATCACCCTCTTTTCATTTTAACCTCTTTTTATGTCACAATTGGACAATAATTGGCTGTAACTTGTAATTTAGTTTTAAGTGATTCTT-AATTCATCACCCTCTTTCATTTTAACCTCTTTTTATGTCACAATTGGACAATAATTGGCTGTAACTTGTAATTTAGTTTTAAGTGATTCTTC	scaffold52543:6545-T-i1	54205
SLG-1	DAFWA6969	0.336	80	AATTCGAGAATGTAGTGAGGGCAGAAGAGGAAATGGAGGTAGGAAGAAGTTTAGAATATTCGGATTCTGGAATATTTGG[T/A]ACAGCAAAAAAT	scaffold52543:8009	54205
SLG-1	DAFWA5363	0	69	AATTCATTGAAATATGGTGTTAATAAGTTAAACAAAAGATAAATTCGGACATTTTTTCTTTTGAAGGG[G/A]AAATTGGGAGCGCAAGACACGAG	scaffold52543:10729	54205
SLG-1	DAFWA2813	0	47	AATTCAGATTTATCAGTCTATAAAAATAATAGCAATGAATTGACTT[A/G]TATAGACTAGAGGTCGCAAAGTGCTAACTATCCTTAAATACCAAG	scaffold18289:9600	21350
SLG-1	DAFWA2047	0	48	AATTCAAAATTTATATCAACTTCTTCTTTCCTCCTACTGTTTATTCA[C/A]TACAACCTACTTCTTCATCTTCTCAACCTCACCATGTTATAGGT	scaffold52543:24353	54205
SLG-1	DAFWA8375	0	27	AATTCTGAGTTAACACAAATAACAGG[C/T]TGGCTGTGTTAAAATTGATGCCAAAATTAACCTTAGAGGAATGTACAATGTTGCAAGGGTGAGCT	scaffold21376:67223	83638
SLG-1	DAFWA4729	1.453	7	AATTCC[T/C]ATTAATTTGTAATTTTGCTGATGAGATTTATGTTAAACTCCTTGACCAGCTGGATGACGAGTATCAGAATCTGCATAGTGAACTG	scaffold21376:27047	83638
SLG-1	DAFWA8533	0	74	AATTCAAATACTAGTATCTTGGGAGGAAAGCCATTGCTCAATCCCAAGCCTAAATTAGCTTCTGGTTCAGAAG[T/C]CTTGAAGGAAAAGCCAAG	scaffold21376:1431	83638
SLG-1	DAFWA4888	0	44	AATTCTTGTGAATTGAAGAAAAGAATTTGAACAATCTTATTCA[A/G]GTGATCAAGAATTGCAAGAAATTACAATGTTTGAGAGAGAAAAAAGAG	scaffold21376:434	83638
SLG-1	DAFWA4494	0	92	AATTCCTCAATCCAGCAAGTGGTATCAGAGCTCATTATCCAACAACTCAACCAAATATTAAAACAACAGGTGGTCGATAAATCTATGTGTG[A/G]	scaffold42905:3247	25396
SLG-1	DAFWA145	0.717	58	AATTCAAGCTAGTATTGAGAGAGTAAAGTAAATATTTTAATGAAGAGAAAAAATATG[T/C]ATTAGCAATGTAAGAATTTTATACACTTATTCTA	scaffold74952:1621	11920
SLG-1	DAFWA6666	1.453	38	AATTCTGATCTATGGTAGTGAGTTTGAAAAAATCTTT[G/T]ACTTGAAGTTGTTGTCTGAATCCTAAAAAAAAATTTGTCACTGGAGATAGGTTT	scaffold60727:7566	19581
SLG-1	DAFWA313	0	50	AATTCCCATCTTGGGTGGATGAGCATTTCCAGCTTAGCAGTACAGATGA[T/C]GAGCGTTCAAAAGATGAAGTAGACAATTCAGTCCAAAGTGCT	scaffold89662:6237	11695
SLG-1	DAFWA6350	0	17	AATTCAACCTAAACTT[A/C]AATTTTATATGATGCAGAGAGTGAAAGCTTGGGACAGCTTTGTAATTTCTTCCTGGTAGAATGTTGTGACTTTGG	scaffold81886:9591	58115
SLG-1	DAFWA1539	0	58	AATTCTTTGATGAGGCAGTCAAGTTAGCCTTACAGATTAAGGCAAATGCCCAAGGTT[A/G]ACCCTAGCATATCTACTTGCATCTTAGTTCTGTG	scaffold60727:8722	19581
SLG-1	DAFWA6292	0.718	81	AATTCCCTTTGATTTTTTTGGTGCACTTCCCTGCAAGTCACTTTCCGAGTCTCTAACTCACACTAACCATCAAACCATCT[T/A]ATAACCACCTT	scaffold95266:17341	21978
SLG-1	DAFWA4302	0	37	AATTCCTCTCTCATTGTTGAAACAAAAGTGACGCCA[T/C]TGAGGACTGGTAAATTACCAAGAGTTTATGATGAGATTGCTATAAAAGTTGAACA	scaffold60727:16242	19581
SLG-1	DAFWA8155	1.453	48	AATTCAAATTACAAATCCTTCTATATCACCATAAAAGTAACATGTCA[T/C]GAAGTAACACAAAGTATTACTTACTTATGACATATTATCATTAC	C28580018:321	1146
SLG-1	DAFWA4369	0.718	20	AATTCCTGTGATTTCATCT[T/C]TTACAGGTTATCAAGAGTGGGGCACTTTTCATATCTTCTAAAGGTGTGTTACGTTTTACTCCTTTAGTTTAT	scaffold36514:30433	50220
SLG-1	DAFWA8488	0	63	AATTCTGTGTAAATCTAGTGCAAAAAATAAAGTTATTATCCCCTTTCTTTGTAAGGGGTCTA[C/A]CAGATTTATGGGAAAGTGAGCAAATGTGA	scaffold36514:20577	50220
SLG-1	DAFWA7056	0.717	61	AATTCAAGTATCACACACAACAAATACTAACATAATAATATTTTCAGATAAAAAGGCACA[T/A]AACTTGAATTATTTCTCTTTCTGTAATGGTA	scaffold79504:14136	15619
SLG-1	DAFWA3487	0.718	66	AATTCTGATGTGAAACAACGTGAAAAGAAAGGAGAAAAATCTGTCTTCTGAACAAGAAATGGACA[G/A]ATATCAAAGCTCAGCCAGGAGCATTT	scaffold31346:303	33727
SLG-1	DAFWA5757	0	70	AATTCAGAATTAATCGATTTAATATTCTTGAAGACTTTCAGACAGTCATATAGGGACAGATTTCCGAAT[C/T]TCCTTCAGGTTTTCTTTCTTAG	scaffold69188:4765	13447
SLG-1	DAFWA4684	0	48	AATTCAAAGCTTCTCCTTTAAAAGGATCATAGCTGGTTTTGCACTAA[T/A]TGGATAGTCACAAAATCATGGACAAGATCTCATACTTTAGATCG	scaffold79504:1197	15619
SLG-1	DAFWA7636	0	23	AATTCATTCCTAATTCAATTTG[C/T]AGAGAAGGGCTTAGCACCAGATCCGTTGCTGCTTCCGACGAAATTCAATTGCGTATTGATCCTATGGAC	scaffold31346:33202	33727
SLG-1	DAFWA3798	0	52	AATTCATGATCTTCTTCTTGCACCGAGATAACACATTTGAATCATGTTAAT[T/A]AGATATGGGATCATTATTTATCAATCGCTGTCATAAACTA	scaffold79504:533	15619
SLG-1	DAFWA7704	0	10	AATTCAGAG[A/G]ATGTCACTTTCTTTTCACTGTCAACTTTTTCAAAGGAAACAACAAATGATTGTGCTTGATCTAACGTAAGACCATATGCCCT	scaffold31346:374	33727
SLG-1	DAFWA5768	1.453	62	AATTCTAGTTTTGTCTTGGTCCTATTGTTTGCTTGATTTTTCAATTCATTACTAAACTATT[C/T]TGACAGTTACTGCATACTATTTGCCTTAAA	scaffold28177:2629	23763
SLG-1	DAFWA5930	0	58	AATTCTGAAGCAAGTGTATACATTTAAGTTCTAGAAATAGAAAGGATACACTCACGG[G/A]ATGAGATAGCCAAGATAAACTATACATGGAATAT	scaffold28177:2514	23763
SLG-1	DAFWA3731	0	55	AATTCAATCCAATTCCCCCTAACATTAGAGGAAAAAGAAATCAATCTAAACATT[A/T]ATAAAAACAAAAAACAAAAAACTTAAACCTCATAGGG	scaffold75064:5391	12819
SLG-1	DAFWA3521	0	43	AATTCTCTCACAAGCTAATCGACATTCATCTGTATGCTTTGC[T/A]ACAGTAGACTCTAGGACTTTCTCAAGTTCAGTCACTCTATTGCTTAGCT	scaffold24039:3709	25962
SLG-1	iDAFWA686	0	31	AATTCTACCAAATCAGTGAACAATGAATAAATGGATGAGTGACACCTTAAAAAAATCAAGCTACAAACACTAAATGTGCCAATTTCAATACT-AATTCTACCAAATCAGTGAACAATGAGTAAAATGGATGAGTGACACCTTAAAAAAATCAAGCTACAAACACTAAATGTGCCAATTTCAATAC	scaffold28177:9904-A-d1	23763
SLG-1	iDAFWA797	2.207	62	AATTCAATAAATCAGAACAAATTATAGCTTAATGGATCAAAATATAAACAAATTATCAAAAATGATGTAAAACATTAATGAGTAGATATTAC-AATTCAATAAATCAGAACAAATTATAGCTTAATGGATCAAAATATAAACAAATTATAAAAAAATGATGTAAAACATTAATGATTAGATATTA	#N/A	#N/A
SLG-1	iDAFWA205	0	76	AATTCTCGCAAATTGTACAACTGCTGCTTTTTCTCGCCATCTTCAGCTTCTCTAATGCGTCAACCGATATAACTTTTATTTATTTCGCTAGT-AATTCTCGCAAATTGTACAACTGCTGCTTTTTCTCGCCATCTTCAGCTTCTCTAATGCGTCAACCGATATAACTTTATTTATTTCGCTAGTT	scaffold61893:1703-T-i1	13348
SLG-1	iDAFWA317	0	38	AATTCAATATGTATTTAACTATAATACACTATTCGCGTGTAAGAGTTTTTTCACACAATAAGTCATACATTGTCAACAAATCTTATATAGAT-AATTCAATATGTATTTAACTATAATACACTATTCGCGTAAGAGTTTTTTCACACAATAAGTCATACATTGTCAACAAATCTTATATAGATTT	scaffold95501:13297-GT-i2	17469
SLG-1	DAFWA7059	0	83	AATTCATATTCCACACAGATTTGTTCAACTGTTGAATTTGCTTACATGTCCTGAATCAAAAAGAAGAGAAAAGTTTAGACAC[G/T]ATGCGGTCA	scaffold61893:8230	13348
SLG-1	AntjM2	0		CTGATGACAATTAGTCACACTTAGTAATGAGTTTGACATAAGTTGCATTAGGGTCATAACCACATT ATTACTATAGACTAAAACCAATTTTTTTAACAAAAAAACATCAAAACCAAAGGAATTTTATAAAGACTAAATTTCCTGGAACAAAAAACAGATTTAAACCTAGCAAAATTAATAATTTACAGTTACACCAAGACAAAAGAAAGTAGAAAATATCATTGCAGAAAAGGAGCCTCCCGTAAAACATGCACACGCATCAAACTAAGGAACAAGGATCACTTGTCCCAAAGTCTGTCCAAATTATCTGTCCTCACCCATTAAAAATTGACACATGAGTAAATAGAGTTTTTTTAAAAACAAAATGATATATTTTTATATTACTTGTTCACAGTTGA…	scaffold2992	33979
SLG-1	DAFWA6881	0	23	AATTCAAGCTGCTATCAACTTT[A/G]AAGCTCTCTCCCCACATGCTAACTTGATCAAATGGCTCATATATGCCCATCTTTTTCCCAATGACTAGT	scaffold95501:10796	17469
SLG-1	DAFWA4140	0	71	AATTCCCCTCAAATTAACACTGTTTCTCGTTTGGGTTCAAGAGCCCTTTGCTTATTGCTTTGAGTTTAAA[G/C]CTCCAAACTTTAAATAGAGTT	scaffold79715:13879	14750
SLG-1	DAFWA8565	0	63	AATTCAGTGGAATATTTCATGTTCACAAACACATTCGACCATAGCGAGAAAGTGCACCTCTC[T/A]TATTCTATTCATACCTGAATGGTTCTAAG	scaffold79715:5340	14750
SLG-1	DAFWA2871	0	63	AATTCTTATATTTACTCGTCATGCACGTGGATTTTGGAAACATGGTTGTGGATATTATATTT[G/T]TAGGTTATGTTAAGGAGTGATTTAGGATA	scaffold76083:5417	12646
SLG-1	DAFWA6745	0	58	AATTCATAACTACTTTGTAATTGATCAAGCTTTTCTTGCTGATCATCATTCTCTTTT[C/T]TCTCTGATTCTCTATGTTGAGTATCAAGAAATAA	scaffold95501:8176	17469
SLG-1	DAFWA581	0	74	AATTCAGATTCAAGCGTGAAATATTTATACGTAGGAGAAAATGAGAGAAGGGAGGTCTGTGAGAGAAAGAGTA[G/A]AAAGAAAAAAATAAAAAA	scaffold75763:11332	12610
SLG-1	DAFWA6620	0	76	AATTCTCCGTCTCTCCCCCTTCACCTTGCGGAGCAAAATCCCTCAATAGGTCCCAAGTTGACGAATCATTATCCA[C/T]CGCCGAAATCCTAATT	scaffold2992:8482	33979
SLG-1	DAFWA1039	0	24	AATTCAACACACCGCTCATCTCA[A/C]CTACTTTCAAAATCAACCGTCTATGGATTATCTCCACTAAGATAATATATATTATAATAAAAAATGAA	scaffold76083:5499	12646
SLG-1	DAFWA6253	0	59	AATTCTTTTGTTGATAACCTCAAACAAGATGGCCTAGTGTTAATCATTGGTTAGAACA[C/G]TGAAATTAATTTTTGTTTTTAAGACAACATATA	scaffold95501:13390	17469
SLG-1	DAFWA8186	0	21	AATTCTGCTAGTGAAGCTGG[A/G]GTTTTTCCTGCACCTGCACATTTTAGACTAGTGCCACATGAACCTGTTTGGCAATTGCCATTGCCACTTTT	scaffold76083:10882	12646
SLG-1	DAFWA2809	0	70	AATTCTTTAAACTTTTGTTCCTTTATTTGAAGTTCTCTTGCTTTTTCTAAATCAAGTAAATTAGGAGTC[A/C]TAACAAAGTTTACCTTAGAGCA	scaffold76083:3084	12646
SLG-1	Lanr1	2.98
SLG-1	DAFWA213	0	68	AATTCCATTCTCTACAGCATCACTCACTTCTTGGAATTTGAAGAGTACCTTCATTTGTATGCTCCAC[C/T]TAATCCAGTTCTTCTCTGTCAAAA	scaffold31581:3240	15706
SLG-1	DAFWA5820	0	45	AATTCTTGTACCTGGTCCAGAAGCAACCGAGGTTCAAAGAGCCA[T/C]GCTTAAAGAAGCCAAGAAGAAAGACAACAAGGCATTGTTCCTCATTC	scaffold31581:3348	15706
SLG-1	DAFWA7233	1.12	80	AATTCGAAATGGAGAGCAATGTCACTTTCATAAATGGGATAAACAAAATTTCGTTACTTAGTGCAACAGTTGGAATGCC[T/G]GTAATAACAAGC	scaffold91038:11089	12958
SLG-1	DAFWA1105	0	76	AATTCCACCAGGATTGCACAACACTAATCTCAACTTGGTCTTGTTGTTTTTCATAATTGGCATCTACACCAATTG[C/G]ATATCAACACTGCTTT
SLG-1	DAFWA7361	1.046	32	AATTCTGGTGCTGCGACAGAAGTGTTATGCA[A/G]AACTATTAGTCATCCTCTTAAGGTAAAACCTATTATGCTGTTACAAAAGTTCAGCTTGCC	scaffold61039:5910	39236
SLG-1	DAFWA6885	0	33	AATTCAACAACAAAAAATCATCGTAACGCCAG[T/C]AATCCTCATTGCAACAACTATAATGGCCGCAACCATAATTTAAAATACCGATTTTGTTT	scaffold51342:11879	13917
SLG-1	DAFWA3047	0	44	AATTCAGAGACAGGACTCATGGCTTATTGGTAATTGGAACATT[C/T]GGAAATAGCAATGAAATCAAAGAAATTCTAGATAACCAAAAAAACACT	scaffold33942:52320	64039
SLG-1	DAFWA6717	0	57	AATTCTCAAGTTAAATATGATGTGGCTAACAGGGTTCACTTCTAGGTCTCGAGGTT[G/A]CTGATGCTGAAAGATCTTATCATACTGAATTGATC	scaffold61039:6317	39236
SLG-1	DAFWA4717	0	44	AATTCCAGAGGATACACATGACACACTACAACATTAGTACCCG[A/G]CAATGCCTCAAAACTGCGGTCTAATATGAAAAAATCGATGTCTTTGTT	scaffold77285:6202	13905
SLG-1	DAFWA7732	0	72	AATTCAAGCAAATTGGACCATGTGAAATCTGGATACTGTTTTGTCCCATCTTTGACAACAATAGCCTCTGG[T/G]GCTCTCAACACTTTGTCTTC	C28717348:518	4263
SLG-1	iDAFWA848	0	60	AATTCTTATATCGTATTTCCCTAAGATTTTTCTTTTTTTGTTTCATTTCAACAATGATTTACAAAACCCAATTAATTACATTTCACGGAATA-AATTCTTATATCGTATTTCCCTAAGATTTATCTTTTTTTGTTTCATTTCAACAATGATTTTACAAAACCCAATTAATTACATTTCACGAAAT	scaffold86361:680-T-d1	1008
SLG-1	DAFWA3096	1.453	81	AATTCTTAAAACAAATTTATACAAGTTTCTCTTTTATTCATTCATGAGAATAAGTCAAAATTGAAAATGGAAGGTAACCC[A/T]TATCAAAGCGT	scaffold94268:10087	14649
SLG-1	DAFWA1099	0	56	AATTCCACAAATTGAAAAACCCGACCGCTTTTTTCATGAAATGCCAATGAAAATG[T/C]TGTTAGTACTAATACTAATTAATTGACTTCTATAAG	scaffold9509:16569	35769
SLG-1	DAFWA5618	0	32	AATTCATTCAAGGGTCTTGTCAATCAATTGA[A/C]AAAGATATATGATGAGTTGCAAGCACTTATGCTACTAAGTTCGTTGCTTGAAAACTGGGA	scaffold9509:7193	35769
SLG-1	DAFWA1619	0	30	AATTCTTCTTCAGAAACAAGGAGCCAATC[G/C]GATTCCAAATGCACTGAAGGAAGCTCAAGCAGAAAGCAAAATCTAAAGAGATTAATCTGATA	scaffold23360:9476	32616
SLG-1	iDAFWA284	0	36	AATTCTTTTACCCCAATGTAGTATGGAGAAATTGTTTGTGTTAGGTGATGCATCGTACCATTATGTTGCGTTTTTCAGCATTGTTGGGGAAG-AATTCTTTTACCCCAATGTAGTATGGAGAAATTGTTGTGTTAGGTGATGCATCGTACCATTATGTTGCGTTTTTCAGCATTGTTGGGGAAGG	scaffold94268:6064-T-i1	14649
SLG-1	DAFWA2146	2.001	70	AATTCATCTGTACTGATTTCTTTCATATCAAATAGCAGCAGTGGCAATCCTAAAAATAGAATGACCTCT[C/T]GATGTGTGTGCATTATGTGTAT	scaffold37320:8578	45919
SLG-1	DAFWA4043	0	49	AATTCTCATAATATTTTATAGATCTCATTTAAGAGTTTAAATAGTTAG[G/C]ATAAAGTTTTTTACACATTATTATGATTAGTATTAGTATGTAT	scaffold37320:20500	45919
SLG-1	DAFWA4924	0	35	AATTCACACTCAATCATGTTCTGCAGCTTAAACT[A/G]AAAAAACAATAGGACCTTTTGCTCTTGATAAAATTTCTGATTTAAAAAATGTACAAG	scaffold37320:35819	45919
SLG-1	DAFWA6121	0	72	AATTCTAGTTTCTTTTATCTTGTTCTTTTCCCAGAAGATATTACTTGTCTTTAATTTTCTTTTGGGTGGGA[A/G]TGGGAGTGAGGGGAATTAAA	scaffold37320:10733	45919
SLG-1	DAFWA6295	0	6	AATTC[T/C]TAATAGGTGTAGTAGGATATATAATAAGAATACTTAAATTACTTAAAAAAGTACATAGATAGATAAATATCACTATTCGACACTCT	scaffold37320:20550	45919
SLG-1	AntjM1	0		GTTTGTGC ATTAGCATTT GGTATTGGAA ATGACTTGAC AAATTCTGAA GTTTCTTTGA GATTGAGCTT GCAAAGTGGA TCAGGGAAAT CATCTCCAAA AGGGTTGTTT TTGTTTTTCC CATACAACCC CATGTTGCTC TCAAAGGTTG AATCCTACAT AATAATAATA ATAAAACACA AAAGAAAAAT GAGAAAAGAA AAGAAAAACA TCTTGTAATA ATGCATAACA AATGATATGC TTCATATGTG AGGATGGTTC ATTGATTCTT AGATTCTTAC CATATGTGTT GTTAA	scaffold83350	11407
SLG-1	DAFWA1751	0.915	89	AATTCTTACAATGAACTTCTATTTTCATTTTGCACTACTAAATCATATTTGCAATATATATGTGTTATATTATGCAAACTGAATCTTT[A/G]TAT	scaffold9866:511	30245
SLG-1	DAFWA7544	0	19	AATTCATTACCCTTGACA[A/C]CCTACATGAATTAGTAAAAATAAGTTTAGCCAATTCTAACATGGAACCTGTAGCATATAAAACCAATGTTCTA	scaffold24468:24317	38389
SLG-1	DAFWA8251	0	75	AATTCTTAGATACTTACAAGGAACAAAATAATTCGGTATATGGTATAAGACCAACACCAACTCAACATTGCACG[G/A]CTACACTAACAGTGATT	scaffold9866:8733	30245
SLG-1	DAFWA3379	0	60	AATTCGAACTCATATATGAATACGTGGGCATTCTTTATCAATTGAGTTAGTTGATTATT[A/T]TTTTAATTTCTTAAAAAGTTTTGAGAGCACTT	scaffold9866:19455	30245
SLG-1	DAFWA6728	0	63	AATTCCAAATCTTTAGCTGAAAAGTCAATTAACAACTATCAACATTTTATTCAGTAGAAGTG[C/T]ATAACAGACTAGATATTGGTATTAATAAT	scaffold9866:24749	30245
SLG-1	iDAFWA498	0	16	AATTCAGTAAAAAAAAACAAAGTCCACTGGATGGGGCATAATTATATATAGGACACATAGAGTGAGAAAATACATATACATATATTTATAGT-AATTCAGTAAAAAAAACAAAGTCCATTGGATGGGGCATAATTATATATAGGACACATAGAGTGAGAAAATACATATACATATATTTATAGTA	scaffold9866:18190-A-i1	30245
SLG-1	DAFWA3239	0	22	AATTCTATATCTTAGTGATTC[C/A]GTGTAACTTATACTACTAGAGGTAGGTGTGGGATGGCAATTTGACTAGTGAAATGAAGTAAAGTGACTGC	scaffold9866:29390	30245
SLG-1	DAFWA1756	0.718	60	AATTCCAACACTTGATAGCTTTCTGAACCAAATTTGATTAAAAGGGTAGAGGAATTTGA[A/G]CAAGTGAGGTGAAAAGCACTAGAGATTGAAAC	scaffold46517:13273	24716
SLG-1	DAFWA6048	0	32	AATTCCTTGATGAATTTGAGGTACAAGGAGG[A/G]AACTTCTATTTCAGATCACTTGAATGATTTTCAAGGGGTCCTTGATCAATTTTCAGGAAT
SLG-1	DAFWA3873	0	68	AATTCAACTTTTCATTCTAGGTCCAAACACATTGATGTGAGGTATCATTGGATACGTGTTGTTTTGA[G/A]TGCTAGGTTTTGGAATTGGCTAAG
SLG-1	DAFWA6364	0	85	AATTCAACAAGTATAATTTATTATTCCCTGATTTAGAAGCATACAAGGATTCAATTTTCATTCATAAAGATTTTGCATTTTCCT[T/C]ATTAGCA
SLG-1	DAFWA1016	0	51	AATTCTAAATTTTTGGCTTCTCGTTGGAAGAATAGTGATCGAACATGTAA[C/T]GAATGATGAAGTTGATACCATGTAGAAGTTTAAGATAATAA	scaffold14597:1326	7567
SLG-1	DAFWA1317	1.453	68	AATTCTTAGTAATGCATGATGCTCTTAGACCGAAGGTAAAATGGGCAAGTTTGTGGAGGATGGTATG[C/G]TTCACTGTCGTTTGGCCCATTTGG	scaffold59883:2680	6556
SLG-1	DAFWA6311	0	79	AATTCATTTTTTTTATTTGTGTTAAGATAAAAATTAAGTTTGTCTAATTATATAATCATATCAAAAAGTATAGTGAAT[T/G]GAAAATTGAGCAG	scaffold6553:14951	15976
SLG-1	DAFWA1510	0.717	33	AATTCCCTATATCCAATAATAAGAAGAATGCG[A/T]ATTAACAAACATGGGATATTCATTATAAAGAACTAGTTGAGACATGCATTCATGTTGTT	scaffold59797:721	9563
SLG-1	DAFWA451	0	48	AATTCAAAATTGTCAATGTTGTGTCTTTTCAGGGTATGATGAAACAA[C/G]GAGCTACAAGCAGCTAAACTACTACAAGTATTCTTGAATGAAAA	scaffold14800:16231	16774
SLG-1	DAFWA4773	0	37	AATTCTTCTCATCCTTATGACACCTTTGCTATGACA[A/G]CTGATATGGGACTGCATAGTGACAAACCTGCTATCTGGTATCCTAATTCTGGAGC	scaffold16995:5613	13082
SLG-1	DAFWA5311	0	43	AATTCTCTCATTCCTTCTTTATGTTGTCTTTATCACTTTTTT[C/A]TCATCTATTCCGATAAGTTTCCTTTATATATACTACAAGAGAATAAGAT	scaffold16995:12798	13082
SLG-1	DAFWA5804	0	31	AATTCATATCAATCATATATATATTGTTTA[C/T]TCTCTTACCAACTAGTTTAGAGTGTTGAGGATTCTTACTTTCTATGATACACTTATTTAGG	scaffold14800:12108	16774
SLG-1	DAFWA643	0	9	AATTCTTC[C/A]TTTGTTATTATCACCATATGTGACATATCCTTTGTCCCTTTGAGTAAGGACAAAGAATTTTGATCTGTCGCCCGTCATGTGTT
SLG-1	DAFWA8492	0.718	72	AATTCATCAAGACACCAAGAGGAATCATAATGCACCAGAGAAAGTACATTATGTATGTACTAGAAAGGTTT[T/C]AGATGATGAATTGCAAGCCT	scaffold7530:11020	19272
SLG-1	DAFWA8485	0	60	AATTCTTAGATGAACCATTATGTCAAAAACGAATGAGGGAAATACATTCCAAGCTCACA[T/C]AAAGTCAAAATAATTTGTCTTTGCAATGCAAG
SLG-1	DAFWA6369	0	17	AATTCGCCAATCACAT[A/C]TCGCACCAAAATGTGTACATTTCCCAACATATCTATCTGGTCTACACTCATCAACAACATAATCAAATGAATTTT	#N/A	#N/A
SLG-1	DAFWA1431	2.207	61	AATTCACATCCAAGGAATTCGAATTGTTTTGCACTGAGAATGGAATTTTGCATGAGGTGA[C/T]TGCACCTTATACTCCTCAACACAATGGAATG	scaffold75806:1545	12905
SLG-1	DAFWA3065	0	46	AATTCGAATTGTTTTGCACTGAGAATGGAATTTTGCATGAGGTGA[C/T]TGCACCTTATACTCCTCAACACAATGGAATGGCTGAGAGGAGGAAT	scaffold75806:1545	12905
SLG-1	DAFWA8164	0.718	79	AATTCATACTGTTGTTTTGGTACCTACTGATTTGGGTGTGGTGGAGTTGGGTTCTATGAAGATGGTTAGGGAGAACTT[C/T]GATTTGTTGCATG	scaffold28004:5870	8803
SLG-1	DAFWA8225	0	12	AATTCTGGTGC[A/G]AACCTGCGACCCCTGTTCGAGTCGCAGAGATTGTGCTGTAGGATATTTTACTCTTTAAACTTTCAGGAACTGCCTGAGTT	scaffold95477:11661	20640
SLG-1	DAFWA2536	0	42	AATTCTCATGCCCTGGTTTATACTGAGTTTCAAAGTCTAGA[C/T]CCACCAACTTCACTACCCATTTAAACTAATCATTTGTAAACAACCTCTAC	scaffold11218:12276	43415
SLG-1	DAFWA3857	0.717	28	AATTCTTTTAACATTACATTTTTCATT[T/C]ACCCAATAATCCATTTACGAGTTGATTTAAATAGAATAAATTTAACTATCCACATCCATAACAT	scaffold92375:16779	25303
SLG-1	DAFWA4566	0	72	AATTCTCATTGGGAAATGCGACATATATATAGACAAACATACATACTCTTAAAATATTACTGAGGTTGTTC[C/T]TAACGGAATAAAAATATTTT
SLG-1	DAFWA6901	0	83	AATTCTTAGAATCTCCTCCTCGGCTGTTCTCATGAATTTGAGCATTGATTCTGTAAACTTCTGCTTGCGATCATCTGACACG[A/G]ACGTTTCAT	scaffold95510:7443	17942
SLG-1	DAFWA1887	0	41	AATTCCGGGTGGTGGATAAAGTGGTGGGAGAGAACATTGA[G/T]TTGTTTGTCTTTTAAGTTTGGTTATTACCAAGGAGGCAGGTCATGACTTGT	scaffold68114:1266	3190
SLG-1	DAFWA2489	0	63	AATTCACTTTGTCAAAGAACCCAAGTTGAGAAAATGTACTTTGCAGTTATCCACTACTGTTC[G/A]TCAACAACATCACCTTTTGAGATCTTTCA	scaffold5912:20359	35050
SLG-1	DAFWA7965	0	78	AATTCATAGTAACCACAATTAGGAAACACAGTGTAAGATGCAAACTCAGCAGGCACTGTTGGATGCAAATTTGTTCC[G/T]ACCCATCCTTCAGA	scaffold20805:2859	11380
SLG-1	DAFWA2505	0	46	AATTCTTGAATGAATCTTTCATGTGCATTGTGTTCAACTGGAAAG[T/C]TTCCAACTATCGGGGAGTTCCATTGTTATCAGCATAAATATGAAAA	scaffold92375:15502	25303
SLG-1	DAFWA8059	0	36	AATTCATCATAATGAGGAAAATTGTTGACAAATCA[T/A]AAACTCATAACCATGTAAATATCTTCAAAAAAAGTGCTCTATGCTCTATAGTTTAA	scaffold92375:14094	25303
SLG-1	DAFWA7995	0	41	AATTCACTTCTACAGTTCTACAGTGTTTTAAGCTGGACTA[G/A]ACTTTTAGGACACAATGGGTTGCATGCCCTCAAAATTAGCAGAAAATAAGT	scaffold149:20737	23384
SLG-1	DAFWA2351	0	61	AATTCTAAAGTATCAATGATAGAAAACAAAGATAATTTGTATGGATAATCGTAAATTTCA[C/T]AAAATCAGTTCCTAAATAATTGTAATATATA	scaffold64866:1641	3460
SLG-1	DAFWA4051	0	69	AATTCATTATAACTTTTAAACATTAAATTTGGCCTAGAATAATGATGAAAAAATTCGAGTGAAAAAAA[C/T]ATGTACTAACGGTATAAGAGTTT	scaffold92375:21469	25303
SLG-1	DAFWA3675	0	10	AATTCCAAT[A/T]TAGTGATATAACATTTTTATTTACTTATTAACTTCAGTGATGTAACCTTATTGATTACGATATTTTGAATTTTCCGGGGATG	scaffold149:12159	23384
SLG-1	DAFWA1139	0	84	AATTCAATTCAATAACATTTTCTCATTCTTTCTTGTTCATCAAGAATCTCACTTATCCATGCCTACTACCATTTTAACATCAA[G/A]TAATAAAG	scaffold5912:19726	35050
SLG-1	DAFWA730	0	34	AATTCTTATTTTCATTAAATTTTCATGTACAGA[G/A]TCATTTATTTTTATTTTATGTTACTAAATATTTAATTTTTATATATTTAATTTTGGAG	scaffold92234:1053	1181
SLG-1	DAFWA5981	0.314	6	AATTC[G/T]TTCACTTCCAATCTTATTCAATAAAACCTAAAACACTTTTATTGGAGATAATGTTCTTTCAATAAGTAAATATTGTAAAGATGAAT	#N/A	#N/A
SLG-1	iDAFWA515	0.4	61	AATTCTCACTTTTGCAAGGAAATTTCCTTAGTCTTATCTTATGTGTTCTGTTGTCTTCTTTTGAATTGTACATTCAGAAACTTGCACATTGC-AATTCTCACTTTTGCAAGGAAATTTCCTTAGTCTTATCTTATGTGTTCTGTTGTCTGCTTTGAATTGTACATTCAGAAACTTGCACATTGCC	scaffold96514:6145-T-i1	42171
SLG-1	iDAFWA349	0	64	AATTCTAAAAGTGTGTCCAAATGATTTCCAGTATATGATTCTGAGAATGCATGAACTGTTGGGGCTATAAATTTTCTTTGATATTAAGAATT-AATTCTAAAAGTGTGTCCAAATGATTTCCAGTATATGATTCTGAGAATGCATGAACTGTTGGGGGCTATAAATTTTCTTTGATATTAAGAAT	scaffold21636:4060-G-d1	17145
SLG-1	iDAFWA279	0	34	AATTCAGTTTTGTTGTCAAAGAATTATAAAAAAATATATACACATTACATAACCGAGATAAACAATAAGAATAAATCTATCTCAAACAAATG-AATTCAGTTTTGTTGTCAAAGAATTATAAAAAAAATATATACACATTACATAACCGAGATAAACAATAAGAATAAATCTATCTCAAACAAAT	scaffold61854:3340-A-d1	17255
SLG-1	DAFWA3383	0	65	AATTCTATATTGGTGACTTAAATAAGAAGTTGAAATTTTTAAAATCTTCAATAAAATCGCAAAC[A/C]AAAAATATATATTAAATATAAGGTGAG	scaffold8613:7414	10060
SLG-1	DAFWA7824	0	90	AATTCACATATTGCCTGAAAATTTGATAGTTAAACTCAAGTTACACTGAGTATGAAAGGAAAGTGTGCAATTTTTAATTTCATGGACCC[A/G]AA	scaffold21636:13985	17145
SLG-1	DAFWA4664	0	64	AATTCAAGGCATAAGAAAAATGAACCTGAAAAGTGAAAGATACATGGATGAATCAGTAAACAT[G/A]CACAGTATCAGATGAACATGGATGTTGG	scaffold96514:7840	42171
SLG-1	DAFWA2770	0	57	AATTCATAGCTTCAAAACTCACAATGTAGAGATTGCTTACATCCATCATAGGATAA[C/T]TGTTTTGAACAACCTTCAAGTGTATACAGTAAAAC	scaffold90507:6904	8523
SLG-1	DAFWA5465	0	53	AATTCTTCTGAAACTTATAACATTCAGTCCCAGTTCAAGAAATTGGGCAGGA[G/A]AAGGTTAAATTAAGTTGCAGCATGAAAAAGAGTAATCTA	scaffold96514:27468	42171
SLG-1	DAFWA7260	0	74	AATTCATCTATGCTATTCAGAAAAATATTACGGTATCTTTGTTGTGTTTCAATTTGGATTGATAGAGTGTTAT[C/A]TATGATATACTTAGTTTC	scaffold14396:3035	11635
SLG-1	DAFWA2446	0	46	AATTCTTTGTTTAATATATGACCTAAACACTTGTGCCATAAGGTG[A/G]CTGAATTCTCTTTTAATTTTCGTTTTGTACCACATGAATTTGTTTG
SLG-1	DAFWA8429	0	32	AATTCAAATGCTTCTACTGGGGCACCGCTAC[C/T]GCCAAGTCATAGAAAAAGGAAACATAGCAGTACTACTAGCTCTCTTCAGGAGCATGATGA	scaffold96514:8147	42171
SLG-1	DAFWA1162	0	45	AATTCTATGAGTTTGTTTGTTTTTCTATGTTTGATTTGATTGGG[T/C]AAGGGTCTTCATTCCATTTTGGATTTTTATGTGATATTTTTATATTT	scaffold45121:12976	16061
SLG-1	DAFWA4734	0	84	AATTCACACTTGAAGGGGAGATGTTGGGTATTCCAAGTGTGAAATGAAGAAGTCTCACATTGGGCAAAAGTGGATGAGTTAAA[A/G]AGCATATA	scaffold14396:6266	11635
SLG-1	DAFWA2208	0	22	AATTCTGAATGAGCTGTATGT[C/T]AGGCGGGTACACATCTGCTGTCCCATTCCTTTGTATCACTCCATGTGCCAGGAGATATGATTGGTCAGAA	scaffold90507:1234	8523
SLG-1	DAFWA3003	0	49	AATTCATCAATGTGCACTCTTTCATTGTCCTATATGTATTATTCAGTG[T/C]CTATAAACATGATGTTTAAAGGCCACTGGATTGTCAACTCGAT	scaffold20851:528	24800
SLG-1	DAFWA5707	0	54	AATTCAAACCATTCACTGTTCCGCCACTCTTCTCGATGTTGCTCAAATCAGCA[C/G]AAGCATTGTTGACAATTTCCTGGGCGAGGCATGAAGCC	scaffold96514:8066	42171
SLG-1	DAFWA1757	0	84	AATTCAAATGTGTCATACAATAACGAGCAAACATCCATACATGTATATATACATCAGGTATAATCACATTAACAATGACTTAT[T/C]TATAATGC
SLG-1	DAFWA6072	0	92	AATTCAAATGAAACTCTGCAATGTTTTTTTAAAAGAAACAGATCATAAGAATGAAGAATACTTCAGTGGGAACTGACAAGAAAAAACTCAA[A/C]	scaffold45121:5704	16061
SLG-1	DAFWA5255	0	91	AATTCAGTTGTTTCCCTTTCCCAGCTGTTTAACTAAGCTAGATCTAATTAAGCATACATAATGGCTTTTACTTATTAATGGTCTTGAACA[G/A]G	scaffold96514:7990	42171
SLG-1	DAFWA2799	0	29	AATTCCTTATGATTGGTGAAATACCAAT[A/C]CTAGGATCTTGAATTTCATGATTCTCACACGCATATATGAAACAAATGGTGCACTGTCATATC	scaffold23680:19178	33256
SLG-1	iDAFWA229	0	74	AATTCTACCCCTCATTCAGTTACCTCGACCAAAAAACTAACCAAAACTATTGTGAGAATTGAGATACTATTATTCTCTTGAGTAAACTGAAC-AATTCTACCCCTCATTCAGTTACCTCGACCAAAAAACTAACCAAAACTATTGTGAGAATTGAGATACTATTATTTCTCTTGAGTAAACTGAA	scaffold96514:25776-T-d1	42171
SLG-1	DAFWA4128	0	40	AATTCTCTTCCTTCTCTCTTCTTCTTTCTTCTTCACCAC[C/A]ACATCACCCTTCTCTCTCTCTCACATAACCTCTTTCCTCTTCAAAACTTTAA	scaffold45121:13393	16061
SLG-1	iDAFWA843	0	49	AATTCTTTAAATCACTATTGGGTTGATAGTTTTCACTGCCCTTTTTTTTTGTAACAAATATCTTCTCCATTAACAGTGTAGTTTGTTTTTAA-AATTCTTTAAATCACTATTGGGTTGATAGTTTTCACTGCCCTTTTTTTTGTAACAAATATCTTCTCCATTAATAGTGTAGTTTATTTTTAAT	scaffold21636:14119-T-i1	17145
SLG-1	DAFWA5926	0.199	32	AATTCTCAAATACACCCTTAGTATAAACAAG[C/T]GGACTACTGAGTAGTGAGTACTGACCTTGTGATGATATATTTATCTATCTATCTAATCTT	scaffold90507:5633	8523
SLG-1	DAFWA7641	1.767	27	AATTCCAAGATCAAGGACCTCACATT[A/G]AAAGATCATATGAAAAATGTTTTGAAACCCGACCCAGAATTGGCATCGTTTGTGAGAAAAGAATG	scaffold78021:10117	17056
SLG-1	DAFWA1271	0.214	64	AATTCAAAAATGGATATTTATGATATGCCATCATAAATTCGAATTATATAATTAATAATAAAT[A/C]GAAAAGTAATTTTAGTTTTTTTTGTTTA	scaffold39703:511	4090
SLG-1	DAFWA8380	0	40	AATTCATAATTAATAATGACCAAAATATGATGAACATTA[C/T]TATCTACCTTTTCACCTTGCCCTGCATCAAAATTCAAGACCTGGTTTCATCC	scaffold72450:5292	12450
SLG-1	DAFWA5025	0	22	AATTCCTCAGCCAACCTATAC[T/C]AGGGCAGTATGACCGAGTTTAGTCACCACCCTCAAGATTATACTAAGGTGATTTTATGGATCACCTTAAA	scaffold42625:8323	10950
SLG-1	DAFWA4563	0	21	AATTCTTTTTCTTCTAGAGT[C/T]GACGCAAGAATGTTTTTGGATTTAAGGTCGTAATGCATTTTATTCTTGTCTTCATCATTCCATGAAGATTT	scaffold3377:2209	6647
SLG-1	DAFWA1945	0	87	AATTCCAAATAATCAATAAAAATGAGTTATTATTTTATTTTTTGGAAAGATAATTGTAATAATTTAATCCTAACCAAAGATATTTT[T/G]ATTTT	scaffold14239:22021	22350
SLG-1	DAFWA610	0	75	AATTCTTTATGAACAATATCTTGATTAAAACTGTCTAGATGTTTAGTTTAAGTCTTGCTTCTACATGCTTATTA[G/A]TCTCTTGATTTAATGAA
SLG-1	DAFWA1049	0	68	AATTCAATGAATGGATAAATTAAAGTCAATTTTCTTCTTTTGTACACTTTGAACACTTACAAGATAA[C/T]AATTTAATTGATCAGTGTAAAGTT
SLG-1	DAFWA2473	0	53	AATTCAAAGCTTTTTCTGATAGCTCTGAGCTTGTCCATTTGAACACTACAGG[C/T]CAGCCTTTCACATGGTCTAATAGGAGAAGTTTGGCTCTC	scaffold3184:6055	10722
SLG-1	DAFWA4375	0	65	AATTCTCAAAAAGCGGGGAGAAGGTCTCAGTGTAGTCGATGTCCTCTTTCAGAGTGAACCCCTT[G/C]GCGACAAGCCTGGCATTCTATCTCTCA	scaffold97975:2793	3344
SLG-1	DAFWA8007	0	25	AATTCAAAGTTTTTAATAGCTTGG[A/T]AATACCAAATTGTAGGTAAATTAATGGGGAGTGAGTCAGCAGCAAAAGATAGCTGTTTAAGTGCAAG	scaffold71682:12706	23189
SLG-1	DAFWA6337	0	86	AATTCGATTAGGCTCAAATTCACTCAATCTTAACTAGAAAAAGTATTCAATTATATTCACAATTTGTCCACTATCGACAAATATT[C/A]TTTTAC	scaffold65591:3767	6806
SLG-1	DAFWA8541	0	53	AATTCACTTCCACAAGTGCAATATATGCATGCTCTGTCATGATCATCCACCT[C/T]ACCCCAATATCCTCCCAATAACCTAGTCGGAAACAAATC
SLG-1	DAFWA3962	0	33	AATTCATGACAGGTTAGTTCATGTTAACTTGT[G/A]GGGAAATGGGTTACCCAAGTTTTTCTATGAAGAAAATTACCCTCACGAGAATGGATCCT	scaffold39443:3657	14442
SLG-1	DAFWA4615	0	6	AATTC[C/A]TGCGTCTTCAGCAGGGAAGCATAACAATTTGGGAATATGCCGCCAAATTTGAAGATTTGGCTAGATATGCCCCACACTACAACCAA	scaffold42625:3104	10950
SLG-1	DAFWA3140	0	66	AATTCTTGGGGTGAAATATTGTAATTACAGCTCATAATATTTAGTGAAAAGTCTCTTATGCTGCA[T/A]GAGTATTGAATATAGCCTTCGGTGGA	scaffold630:1543	25548
SLG-1	DAFWA8529	0	77	AATTCAGCCCAAGCATGAGAAGAAGAAAGCATTTTCCATGTCAGCTAAAGCAAGGCAACATGGTTTAATCTTTTGA[T/C]AGACCTTAATCCCAA	scaffold27624:1404	12750
SLG-1	DAFWA3547	0	29	AATTCAACATGCGCTGAGCTTTGACCCA[T/C]CAATCTGGATGAGGAAGGGGTCAACATTCTTTCTGAACTCTGTTCATCACCTGGTGCCAATAT	scaffold91216:19568	25055
SLG-1	DAFWA4577	0	74	AATTCTCTATCATTGCATCTTCCTCGTGACATTGCAATCGTGACTTTTCTCTTTCTTCTTGGAAGTGCAGTTG[C/T]TGTCCTCCTTCTCCTTCT	scaffold14239:14703	22350
SLG-1	DAFWA3328	0	65	AATTCCATGGGAGTGCTCTTTTATGAATCAACCTTTTTCAGATAGGTTGGACACTGAAATCGCA[T/C]GTGTCCTGCTATTCCGCACTCGTGGCA
SLG-1	DAFWA8135	0	89	AATTCTTATATACCTAAAGGCAGCACCTAGATAGGGCATTTTCTATCCTGCAAATTCTGATCTTCAATTGAAAGGATTTAGTGACTCA[G/A]ATT	scaffold39443:8637	14442
SLG-1	DAFWA1784	0	25	AATTCATAAACCTAATAGCTTAGT[A/C]TTTTAGATTAATATGTGACGAGTTAGGTCTACTTATTATAGTGGCTCTTTTTATTCTTTGGCTTATA	scaffold98765:2911	8323
SLG-1	DAFWA3604	0	63	AATTCTATGTAGTTTTCATTTTTTTTGTCTGAGATTTTGCTCATTTCCTTTTAGCTGCAATA[A/G]TGATTATTTTGGTAAGTGATAGTCAAGCT	scaffold72450:5194	12450
SLG-1	DAFWA2907	0	31	AATTCTAGTGATTTAAAAAATTTATCTAAT[A/G]AAGCTGAGACTAATGGTTTTGATGGTGAATCAGTGAGCCCAAATTCTATTTCTCTTCTCCT	scaffold14239:14803	22350
SLG-1	DAFWA4876	0	80	AATTCCTGACAAGGTATAGAAATTCTTTCCAACTAAATTCTCACAATTATAAGCCAATGTGGTCAAATGTGTATATGAA[G/C]AATTAATGATGA	scaffold78021:11408	17056
SLG-1	DAFWA1030	0	66	AATTCTAACATTAACATTAACATGTTTCTAAGTTCTAATGGACTTGTCTGCATTTTTTAACCAGA[T/A]ACTGAACAAATGTCTTCACAATTTTT	scaffold59572:2704	18586
SLG-1	DAFWA1521	0	61	AATTCCAAGAACCTCTAACCTTGGTTTGACTATCCCTATCGCCGAAGAAAGTGTTTCTCG[T/C]GATCTAGCCTCAACCAAGATTCTCGCTCTAA
SLG-1	DAFWA6967	0.718	11	AATTCATCTT[A/C]TTTTATTTGTTTGTACATCCAGCTATGTAAATTAATCTTGCAAGCACAGGAAATCTATAGTGAAATCTGGATTTTTGAGAA	C28721920:2227	4591
SLG-1	DAFWA6206	0	51	AATTCTCTTTTCTTGCATAATCTCCTCTCTAATTCTCACACCTTGATTCT[A/G]AACATTTTCTTTCCGTTTTCACTATCATTCTTTTCTTTCTA	scaffold58181:34889	43896
SLG-1	DAFWA2377	0	52	AATTCATTTGTAGATTTTTATGCCGTTAATGAAGGAGAGTAGGGATTATCT[C/G]ACTATTTATTTCTTATTTTATATTTACTAGTGAGTTTGTT	scaffold92315:386	9236
SLG-1	DAFWA533	0	23	AATTCCAGAAAGACTGAGTGAA[G/C]ACAATTTTATTCTCAATCAATTATACCACTAAGGTTTTATTCACATGACAAAATTACATAAAAGACGAC	scaffold58181:30715	43896
SLG-1	DAFWA6068	0	31	AATTCCAACTTTTAGCTATTGCTATTACTA[G/T]TATGACATAAAGCAGACACACCCTGGACATGAACATAACAAACAGATTGATATTTGGCCAT	C28721920:2264	4591
SLG-1	iDAFWA395	0.717	16	AATTCTTATAAAAAAACGTTTTTCATTAATTTCTGAAATTAAAAGTGAAATCCATAATTAAAAATTCAAGCGAAATTGTTAGTATATAAATA-AATTCTTATAAAAAAAACGTTTTTCATTAATTTCTGAAATTAAAAGTGAAATCCATAATTAAAAATTCAAGCGAAATTGTTAGTATATAAAT	scaffold23649:6134-A-d1	10299
SLG-1	DAFWA382	0	32	AATTCTTTAACCAATTTTATCACTTATGTGT[G/A]AGTTATACTGTTATATATATTATTAAGTTGTTATTATGTTAATATTATATATGTTAATAT	#N/A	#N/A
SLG-1	DAFWA2639	0.022	20	AATTCAGGAGGAAGATGCT[G/C]AAAAAAACCTTCTTCAGGCTCTAAAGATGGAGGAATTATTTTGGAAAGAAAAAGCTAGATGTGATTGGCATG	scaffold3184:5606	10722
SLG-1	DAFWA5713	0.021	71	AATTCATGGTTGATGAATGTGGGAGGAACTCAAAGTAAGCCATGTTTGGCATGATAGTGTAAGAAACCTC[A/G]GAGGGTGTGCACATTGGGTTA	scaffold78021:9853	17056
SLG-1	DAFWA2153	0.776	15	AATTCTCTCACCTA[T/A]AATAAACACAAGGTTTTCTCAAAATTAAACTTGTTTTATTAATGAATAAGCCAAAGCTATAAATAGGCAATCTGCCT	scaffold47361:10307	17434
SLG-1	DAFWA182	0.616	71	AATTCCACTGAAGCTAATCATTAACGAGTCGAATTGATTTGAATCAAGATAAATTCAACTAGTTTCCACC[T/C]ATATTGTCGACTATATGAAGG	scaffold91216:24421	25055
SLG-1	DAFWA2300	0	48	AATTCGGGAACAGAAACGAATTCCGACGTCGAGAGCGCACCGGAATT[G/A]ATAACTGCACCGGCGAACAGATCAGAGCTGAGTTTCGAGGGGGT	scaffold18886:5195	21996
SLG-1	DAFWA3160	0.043	63	AATTCTTGAATCATCACTTTAAAGGCTTAAAATACATTTTCACAAACTTTTGATTTTATTAT[G/A]ACTGAAAAATAATTGCTTAATCTCAATAG	scaffold51274:6527	11329
SLG-1	iDAFWA499	0.342	76	AATTCAATTCATTAATGAAAATATTATTACACTTTGTTTCTCATTCTTCTTTCTTTACGTCTTTTAAGTTTTTTTTCATATACTTTCAATAA-AATTCAATTCATTAATAAAAATATTATTACACTTTGTTTCTCATTCTTCTTTCTTTACGTCTTTTAAGTTTTTTTTTCATATACTTTCAATA	C28733460:4882-T-d1	5660
SLG-1	DAFWA550	0.328	78	AATTCTCAATAGCCTCTGACTAGTTCTCCTTGATTCCAGGCCAAATGGAAGACTTGAATTGCCTATAAGCAGCATAA[A/G]TATTTAACCAAACC	scaffold95538:1711	5693
SLG-1	DAFWA1762	0.349	12	AATTCTTTCTT[A/C]CTTTCTTTCTTGATTCTCATTTTCTTTGATGGTATCAGAGCTCTTTTAAGAGCTTTGCTACATTCATCATGTCTCTTGAA	scaffold65660:3292	18634
SLG-1	DAFWA3758	0	83	AATTCTTGGTGGAGCTTGATGATGAGCATTGGTTAGAGCATTCATGAACTGGCTCAACTGTTGGACAGAAAAGCTTATGTAT[T/G]GTCTTGTGT	scaffold39443:8804	14442
SLG-1	DAFWA2121	0	69	AATTCACCATCGCCGACTAGAAGTCACTAATTAGTGGTTGACACAAGTAAATGTGTCCCCCTATACCT[G/A]CTAAACAATGTTGCCACTGCACT	scaffold42752:9264	9831
SLG-1	DAFWA602	0.364	57	AATTCTTAAATAAAGAGTTTTAAAATTCTCCCTCGTGATCACTTCTTATAGCAACG[A/G]ATTTTTAGTAATTTTTTATTTTGAACTCTTTTAGC	scaffold4459:4072	7425
SLG-1	DAFWA3020	0	63	AATTCGTGAATCCAATGCCGAAACCAAGCAAGAGTCTGCCAACAATAAGCATCCACATGGCT[G/A]TTGCTAAGCCATTGACCAATGCACCAAAC	scaffold81024:5495	8063
SLG-1	iDAFWA31	0.307	37	AATTCCAAAAAGAACACAACTTTAAGAAATAAAAAAAAGAGAGAGAGAGAAACAAAAATTGGAGATCGAGAAAATGAATAAATAAAAGAGAA-AATTCCAAAAAGAACACAACTTTAAGAAATAAAAAAAGAGAGAGAGAGAAACAAAAATTGGAGATCGAGAAAATGAATAAATAAAAGAGAAA	scaffold33270:4622-A-i1	8917
SLG-1	DAFWA3935	0.407	69	AATTCAGCAGGAACTTCCTCAGAAAAGGTGGGTCAAATGAACATAGAAGAGACTCATGAGCCACAAGA[G/T]GATATCATAAATGGGGAGAATAT	scaffold1594:1814	9509
SLG-1	DAFWA8513	0	44	AATTCTACACTATATCCACACTGATGTATGGGGACCCACTTAG[G/A]AACCATCCATAGGAGGTTCTAGGTATTTTGTTACCTTTGTTGATGACT	scaffold30547:12503	14649
SLG-1	DAFWA8787	0	55	AATTCACACTTGAGACGGAGATGTTGGGTATTCCAAGTGTGAATGAAGAAGTCC[C/T]GCATTGGGCAAAAATGGATGAGTTAAAGAGCATATAA	scaffold30648:1978	13288
SLG-1	DAFWA3441	0	83	AATTCTTATCTTGAAGGTCCTGTTGTTGGAGAGAGGAGCCTTCAAGATTAGTCTACCTTCTTTGTTGAAAATCTTGAGGACT[C/A]TGTCTTCCA	scaffold1594:742	9509
SLG-1	DAFWA4026	0	24	AATTCCTAACTATTGATGAGCTA[T/C]AAGGCTCATTAGAAGCACATGAGCAAAGGTTCTTGGAAAGGCTAACTGAAAGACAAACTCAACAAGCC
SLG-1	DAFWA8319	0	48	AATTCATCATCTCCCAACTCAGTCCTAGGAGACAGTTCCTCCCTCTC[T/C]GCCAACATCTTCCTCGCATCTAAACAAACAACCTCAAGTTCACT	scaffold30648:6715	13288
SLG-1	DAFWA6084	0	83	AATTCCTGTTTGATATAGATTGTGAAGAAGCTGGGTATGATTCAACTCTGAAGATAGCAATGGAAGATCCTCTAACAAGATC[A/G]CCTTTTCAG	scaffold30648:6589	13288
SLG-1	DAFWA8282	0	17	AATTCAACCTTTTCCC[C/T]ATTGGCAGGACCTAATTTGCCTTGCTTCCTCACATACCTGGCTCCATTTCACATTCATGTTACCGCCCTAAGACC	scaffold98994:1407	4287
SLG-1	DAFWA7635	0	80	AATTCTCATCCGAGTATTAGATACACCAGAGCTCATCTCTGACTCTACTTGTACCACCGTTGGCTTATCCTTTCATCAA[T/C]GGAACACGCCGC	scaffold30648:2108	13288
SLG-1	DAFWA3665	0	92	AATTCAACAACTCGTTAGCCGGATATTTTGAAAATGTGTATCTGATGGAAAGTCTATGTGGACAAATTGCATACTCCAACTTCGACCATCA[A/C]	scaffold79873:703	1520
SLG-1	DAFWA883	0	25	AATTCTCAAAACTCTAAACTCATT[T/G]GTAAGAGGATAAATAATATATATAGGATTGACGTAGACTTTTCCTTACCAATAACATGTTTAGTTGT	scaffold4459:3609	7425
SLG-1	DAFWA3719	0	20	AATTCTCCTCCAATATATA[G/C]ACAATATAATCAGGTCTATACTCTTTAGCAATTCTTGCTCTCTTACTTTTTTAGGTTCTATTTGAATCATTT	scaffold56790:7053	8671
SLG-1	DAFWA340	0	64	AATTCATAACATAGTTTGGTTTATTTTATTTGCATTGTTATTAATAAATGAGAATTTAATTCT[C/G]ATGTAGTCGTAGGATTTATGTTTATTTT	#N/A	#N/A
SLG-1	DAFWA6264	0	18	AATTCAAAAATTAGATC[C/T]AGACAATAGCTAGAGTCGGATAGGGGATAAGCATGACCCGTCCCGAAGCGTCTCATGTTCAATCATTTATCATT	scaffold55667:7027	19654
SLG-1	DAFWA4485	2.214	49	AATTCATGTTTATTGACAAATATTGAGTTATAAGTCATTCTTTATCAT[G/A]TTATGGAAGAATCCTCATTATAATTCTGCTTATTTCTACTCAT	scaffold75533:633	1077
SLG-1	DAFWA2058	3.621	89	AATTCATAAGAGTAGGGCTCCCCATAAATTTGTACCCACACTTTAGAAGTGTGTAGGATTCTATATGGTTAAATTTCATTAGATTTAA[G/A]ATC	scaffold1948:13486	23190
SLG-1	DAFWA1678	0.863	18	AATTCAACTTATCATAT[G/A]TTGCTCTAACAAGGACAGTAATGAGCAAAACTCTTGATCCTATCAGCACGATGTTAACACATTCTGCCAAGTTC	scaffold68173:1786	4198
SLG-1	DAFWA5023	0	61	AATTCATGGATTATATGAGTATCAAGTTTCACATGATTCAGGTTTTTCTTTTAAATTTCT[A/C]AATATAGCATTGAACTATTAAGTATACCATT	scaffold78331:14134	17833
SLG-1	DAFWA3032	0	49	AATTCTCTATTTCTGAATGGACATTTCTTCATGTTGTGTCATTCAGTC[C/T]TACACCACCCATATTTTTTAATTTGTTACGATTGAGAATCATA	scaffold68173:1249	4198
SLG-1	DAFWA6894	0	28	AATTCATGGTCTATGGCCTAACAGAAA[G/A]GATGGTTCATACCCATCTAACTGTGATCCTAACAGCCCTTTTAATCCATCTCAGGTAGTTCAAA	scaffold19613:8893	9659
SLG-1	DAFWA4955	0	51	AATTCTTGTTTCCTTAAATTATGAATTTGAAGAACTGTAATGCAATCTTT[G/T]ATATGATTTGATTGAGCAATACAATTTATTTGTATTGTTGA	scaffold9296:39656	40712
SLG-1	DAFWA6927	0	42	AATTCATTGTTTACATTTTTTTTACAAGAAGGACCGTAGTA[T/G]TCTAGCTAGCTAGCAATCAACTGGTGTGGGAATTTAATTTTTATTATGGA	scaffold84373:16353	23576
SLG-1	DAFWA6869	0	89	AATTCTCTAAAGCTTAGAAGAGCATAAAGCAATAGTTAGTTTCTTTTAGGGGATGTTCTATTCCCACATCTATTCTTTATGTGACCCT[C/T]CTT	scaffold8199:26024	34380
SLG-1	DAFWA540	0	22	AATTCAGTCATTACAAATATT[C/T]GGTTAAAAACTAACTTGCAGGTGCTAAGGGAGGAAGCACTACAGCAACTCCATCATCCGATCGTAGCGGA	scaffold9296:39724	40712
SLG-1	DAFWA8098	0	53	AATTCTGCTGTATTTGGAATCCACCCAAAACTGTTTATTTGCTTTCAGACAC[A/G]ATGTAGAGGTAAGTTTAACCCAGCTTGTTTATTTCTTGA	scaffold95184:10143	13883
SLG-1	DAFWA4964	0	83	AATTCAATGTTATACTCAGTAATTATGTCTGGATTCACTTGACTTGTTTACTTAGTGCTGATTTGCGCAAAAACATTGAAAA[C/T]TTAGAGAAG	scaffold78331:13995	17833
SLG-1	DAFWA2362	0	85	AATTCTGCATATCATTTTTTGGGTAATGCGTGCATATTGTATATTTTATTGTAAATTTGTATAACGTATTCAATTTGATCAACT[A/G]AAGATTG	scaffold69981:1259	5812
SLG-1	DAFWA7957	0	71	AATTCTAGTCTTTTGGTTGCAATTGTAAAGCAGTGATGCAATGCAAGTATGTGAAACATGATAGAGATTG[A/G]TAATTTATCCAATATGAGATT	scaffold78331:12238	17833
SLG-1	DAFWA4311	0	83	AATTCAATGCATTCAAGTTATTACTTTTGGTTAAGTTTTGATTCTTTAAGAAGTTCTTAATGTGGTTTTAGCTAGATTACCT[A/C]AAACTTGAT
SLG-1	DAFWA7276	0	87	AATTCACCTCAACCAACGCAAATACACTTTGTCTTTACTAGAAGACACATGGACATTAGCCTCCAAGCCTACCAAAACACCTTCAG[G/A]TTCTT	C28590954:885	1233
SLG-1	DAFWA6127	0	83	AATTCTAGTCAGATAAAAGAGAGTTATGGAACATCCATTTAAACTAACTAAGAGCCTCATCATGCATATAGAAGGATATCAT[A/G]GGAAGTCGT	scaffold19063:5003	6947
SLG-1	DAFWA3057	0	47	AATTCATTAGAAGATATGAAACTTTGATATGATTTTACTAAAATAA[T/A]CATATTTAATACACATTTAAAACTAAACTAAAAGGAAATTGATAG	scaffold19063:6432	6947
SLG-1	DAFWA5088	0	27	AATTCGGGCATCAAAATGTGTGAAGC[G/A]TGATATTTGGGAGATTAGAAAAATTAGTGGAAGACACACTTGTGTATCCACTAATATTTTCCAAG	scaffold68173:2803	4198
SLG-1	DAFWA2999	0	12	AATTCTGTGAT[A/G]GGGATTTAAGTACAACAATATCAAAATGAGTGTCAATGTTATGTAAAACACTTGATATTATAACAATGAATGCCCCCTCC	scaffold809:7081	16199
SLG-1	iDAFWA87	2.207	73	AATTCATTATTTTTTTCTTGTTTCAAACTAAAATCGGGTATTTGTGAGTTGAATTTTAAAGAGGAAGAAAAAAATGGAAGATTTATTAGTTA-AATTCATTATTTTTTTCTTGTTTCAAACTAAAATCGGGTATTTGTGAGTTGAATTTTAAAGAGGAAGAAAAAATGGAAGATTTATTAGTTAT	scaffold9921:3723-A-i1	12309
SLG-1	DAFWA3231	0	6	AATTC[A/C]TTTTGGGACCTTCGTTTTCTCTCTGATGGTGAGAGGTGAAAATTATATGTGATTTGGTGTTTTGGGGACCATAATTGTTCCTTATG	scaffold17451:5359	8072
SLG-1	DAFWA6388	0	47	AATTCAGCCTATGATATGTTGCTCTAACAAGGGCAGTAATGGGAAA[G/T]GGTCTTGATCATTTCAGAACGGCGTTAACACATTCTGCCAAGTTC	scaffold29013:4602	9108
SLG-1	DAFWA4220	0	56	AATTCTTATGCAAGATAGTGCAAGAATGTTGAGAGAATATCAAATAGCATTGTGA[G/T]TTATGCATTAGTTTATTAACAGATATCAAGTTAACA	scaffold52274:2451	8286
SLG-1	DAFWA4917	0	65	AATTCCATACTCAGCATTTAAGACTTCAATATTCATAAAATTGGAAGTAAATAAAGTAATAGAA[C/G]GATCAAATGGAGGGTCATATGTAGGGA	scaffold93517:2913	4488
SLG-1	DAFWA7911	0	49	AATTCCAGCCTGTTGTTACTTCAATTGAAACGAAAGATGATCCACCAA[C/T]ACTACATAGTTTGGAGTCATTTCTCCTAACCTTTGAAGCAAGA	scaffold35590:25950	44791
SLG-1	DAFWA6433	0	90	AATTCCAACTAAAGTGAATCTTGCACATAGAAGTGGATTAAGTGCTCATGATAACATTCTTTGTTCTCTTTGTGGTCAGTTGGAGGAAT[A/C]TT	scaffold81487:3985	8282
SLG-1	DAFWA6626	0	28	AATTCTCTACTGCAGAACTCTAGACCA[C/T]TGTCAGTTCTCAGTCTCTTGATCTTTCTCCCAGTTTGCTTTTCGATCAAGGTTTTCCACTGTTT
SLG-1	DAFWA2275	0	78	AATTCAACTAAAGCATGGTATTCTCTTGGGGGCTGTCTTCTGTGTGCAACTGGTAAGCAAATATTTGCAGGACCATT[T/A]TTATGGTGGATGCA
SLG-1	DAFWA8636	0	29	AATTCTAATATATGCTCAAGTTTGTACA[C/A]GTCCCGACATAACATTTGTCATGGAAGTTTCTGAAAACATATTTGAGCAATCCTGTAATGAAT	scaffold3164:3438	33530
SLG-1	DAFWA4261	0	78	AATTCTTAATGAAATGGTTAGAGGAACTCTAGGGAACACTAAATGCCTATATTTTCATTCTTGCTGAGTAGGTTGTA[C/G]AAAATATTACTTCT	scaffold13872:3568	4675
SLG-1	DAFWA7351	0	15	AATTCTCTGCTACA[G/A]AATTATCAGTTCTCAGTCTCTTGATCTTTCTCCCATATTGCTTTTCGATCAAGGTTTTTCACTGTTTGAACTTGACA	scaffold47457:14982	23681
SLG-1	DAFWA326	0	43	AATTCCCGGTGGCACTTGATGCTTGAATAGAAGTTTTTTACT[T/C]GGGGAGGATAAGATCAGGTATATATACCCTACTGAATTTTTGGTTTAAA	scaffold9921:9589	12309
SLG-1	DAFWA1244	0	47	AATTCAGTGTCTTTTACCAATGCTGCAAATTTTTCTGCTCAAATTA[T/G]TAACATCCCACTGCTGAATGGGACAAACTTTAAGGTCTGGAAGGA	#N/A	#N/A
SLG-1	DAFWA5728	0.014	36	AATTCATAATATGAAATTATTTTATAGCATTTATT[G/A]TTGCTTCATTTGAATCAAATTGCATACCAACAAATAGATCATTATCAAAATCATTA	scaffold29013:3426	9108
SLG-1	DAFWA3300	0.602	60	AATTCAGGCATAGAAAAGTGTGAAGCGTAATATTTGGGAGATTAGGAAAATTAGTGGAA[G/T]ACACACTTGTGTATCCACTAATATTTCTCAAG	scaffold29013:3603	9108
SLG-1	DAFWA6215	0	67	AATTCTGGGATAAAAAAAGTGCATGTTTTATTAAGTATCCTGAACCTCCTCCCCCTCCTCCCCTTC[A/C]CAAAACATAAAGGAATACTAAAATC	scaffold23118:6511	8258
SLG-1	iDAFWA46	0.812	72	AATTCAATTAATTTCTAACAATAGAGGTTACTTTGGCAACATATTGCATCCATTAATCCTAGATAATTACAGAAAAAAAATTAAAATAATAT-AATTCAATTAATTTCTAACAATAGAGGTTACTTTGGCAACATATTGCATCCATTAATCCTAGATAATTACAGGAAAAAAAATTAAAATAATA	#N/A	#N/A
SLG-1	DAFWA1680	0	77	AATTCGATAACAGAGATCTGCGCTGTTTTATTCTTGGGATGGCGTGGTTGATAGTCTCTTTGCACATTTTGGACAG[A/T]AGTAAGAAAGCAGGA	scaffold8199:5694	34380
SLG-1	iDAFWA115	0.007	25	AATTCTAGACCAAGAAAATATGTTATCTTCCTAAATCTTTCATTTCAAACTCACCCTTTAGGCTTCTTTTCAACTCCTCAATTCCCTGTTGG-AATTCTAGACCAAGAAAATATGTTAATCTTCCTAAATCTTTCATTTCAAACTCACCCTTTAGGCTTCTTTTCAACTCCTCAATTCCCTGTTG	scaffold77372:4396-A-d1	4577
SLG-1	DAFWA8700	0	78	AATTCCATTCTCACTATTGTTGTGTAAAATCTCAGGTTGATGGTACCTTACTTCTAAAGGGAACACTCGGTCCTGAA[A/G]GTTGTATGTCTTCA	scaffold69927:3576	4011
SLG-1	DAFWA6652	0	78	AATTCTCTAGTGTAAGTGCTGTGTGTAAATATATTTTTGTTCTGTGATAAATGTAATGTATGATTGCTTTAGTAGCT[C/T]GGTGTCCTATGAGC	scaffold93517:1870	4488
SLG-1	DAFWA1928	0	17	AATTCAAACACACTAA[G/T]ATATGGTTATTCATGCATCAAAGGAAGTACATATTTGAAATATTGAGCAAATTCAATATGATGAATTGTAACTCT	scaffold77372:4435	4577
SLG-1	DAFWA4822	0	57	AATTCTAGTTGGGGCTAATCCAAGAATATGTGCAACTTGGAAGATTGTTATTGATG[C/T]TGTTGCAAAAGATTAGCTAGCTGGAAAACAAATCA	scaffold23017:18966	20454
SLG-1	DAFWA4551	0	74	AATTCACCGAGTATATACATATTTTGGTTTCATTCTATATGAAATAGAATGATAATTGGTTCAATGGTTGTAG[C/T]TATTGCCAATGAATTGGA	scaffold68251:520	2828
SLG-1	DAFWA6282	0	62	AATTCAACTAATATTCATTGTATTTCTAGCTTTCAAGTTATAAAAAACGTAAGCAAATGGA[G/A]AAGGGTGATTATGAGAAGTGGAAATCTTCT	scaffold93517:3035	4488
SLG-1	DAFWA2743	0	67	AATTCCACAGATGAGTATGAAATTATTTATGCAAATTGTGTTCGGTCCAAAGGAAGACACAATTTG[A/G]CAAAATAGTAACATACATGTAATGA
SLG-1	DAFWA7832	0	47	AATTCTCTGATTGTTTTTCAGCCATACACTTGAAGGTTTTAAAGAT[T/G]CCAAACACCTCACTTTTCTGCTTAATCAAATACAACCATATTTTT
SLG-1	DAFWA2793	0	10	AATTCTATC[A/C]CAATGAAATAAGCTAATTCCCCAAGATCTGTCATCTCAAACTCAGATTTGAGCTTTCCTTTTAATGTTAGAATTTCACATTC
SLG-1	DAFWA6878	0	32	AATTCTAATGCCTTTAAATAGGATTTCCAAT[T/C]ACCCATTGTGCCTTTATGAAAGAGTAGAAATTGTTTGGAATGAAGGCATTTCGTTTGGGA
SLG-1	DAFWA7278	0	12	AATTCCCCACG[A/G]CTAAGTGTTGATTAAGGATGCACTAAATAGCATAGAATGTCGTTGGTGCAAGATGGTAGGCTGCCAACGACTAGGACATG	scaffold41857:1760	16977
SLG-1	DAFWA2659	0	68	AATTCCGTTGTGCCTTTTCTCTGTTGACAGGCCCCTGAGGATTCCGATAGGATAAAGATTTCACGTC[A/C]AAATCCAGTTTCCTAGGAAAACCC	scaffold23017:10166	20454
SLG-1	DAFWA7047	0	78	AATTCAGAATACAACAACAATAATCAAAGCACTTTCTTACTAGGTAGAGTCAGTTACATGGATCAAATAATACCACC[G/A]TGTACTATAAAAAC	scaffold95136:6347	8126
SLG-1	DAFWA1050	0.407	53	AATTCAGGCACAAATAACACATTAGTTAGCAATAGAGTATGAGCAAGTCTAA[C/T]AGTTCCTGCTATTGAAGTGGATACTTTGTTGCCATTTGA	scaffold52274:2359	8286
SLG-1	DAFWA1314	0.307	11	AATTCTCATC[C/T]GAGTATTGGATACACCAGAGTTCAGCTCTCTATCTACTTGTACCGTCGTTGGCTTATCTTTTCATCAATGGAACACGTCGC
SLG-1	DAFWA334	0	87	AATTCTCCATGATTTATATTTGAATAATGAAACATGTGTAGTCATGGGAGCACATCTATCCCAAAATGTATATTAATCTATATATT[C/T]ATTAT	scaffold73537:19	2868
SLG-1	iDAFWA384	0	70	AATTCTGATCTTTGATCTGGTAACCATGTTTGATCTATATATCAAAAAATCCTGAAAGGGATTCTGGGTGGCTGTGATGGACACAACACAAG-AATTCTGATCTTTGATCTGGTAACCATGTTTGATCTATATATCAAAAAATCCTGAAAGGGATTCTGGGTGCTGTGATGGACACAACACAAGT	scaffold82356:15266-G-i1	17945
SLG-1	DAFWA4594	2.98	26	AATTCCCAACCACTAAAACAAAATG[A/C]AAAAAAAAACTTCATAATTAAAGTGAGAAAACTAAGAGCATGTATATACATCACATGGATCAGTAA	scaffold22967:17763	35658
SLG-1	iDAFWA146	0	28	AATTCATGGATTCCCAATAAACTTCCAAGAAACCCACGAGTGAATTTTGTAGCAACTTCTGATTCATATCAGAGAAGGAATCAACCAGAAAG-AATTCATGGATTCCCAATAAACTTCCAATTTACCAGAAACCCACGAGTGAATTTTGTAGCAACTTCTGATTCATATCAGAGAAGGAATCAAC	scaffold43718:974-TTTACCA-d7	7036
SLG-1	iDAFWA765	0	66	AATTCATAGACAAGAACCCTTTCTTTATCCTCGCAACAATAACCGATCAACTTAACCAAGTTGGGGGTGTCTTAGCTGCATTTTATAGAAAA-AATTCATAGACAAGAACCCTTTCTTTATCCTCACAACAATAACCGATCAACTTAACCAAGTTAGGGTGTCTTAGCTGCATTTTATAGAAAAT	scaffold39498:3343-G-i1	30905
SLG-1	DAFWA3801	0	57	AATTCTCATCATTTGATCAAAACCTTGCTAATATTCAAAGTAAGTTCCTAATTCCC[A/C]TCTATAGACCATTAAATGTAATTTACATTTATGCA	scaffold91525:19545	24355
SLG-1	DAFWA4125	0	15	AATTCGATATTGGA[C/T]GATTTAGGAAGAGTGTTTGTGGATTTTTCTTAGTTTGGAATGGGGTATGAGGTTTTCTAATATCTGATTAATCCATG	scaffold22967:17727	35658
SLG-1	DAFWA5063	0	56	AATTCTTTGACAAATTTATGGCTGAAACGTTGTCAATCCTTAACTACAATGGCAC[C/A]TTCAGTTTCATCCTCATCTCCTTTAACAGTTCTTCT	scaffold230:13892	27204
SLG-1	iDAFWA549	0.363	24	AATTCGAGAATTGGCACTGTAAGCCAAATTGTGGATGTATTTGAGAGCGATTCATACAATGTAGCAAGAAATCATATAACAGAAAACTGAGT-AATTCGAGAATTGGCACTGTAAGCTGTGGATGTATTTGAGAGCGATTCATACAATGTAGCAAGAAATCATATAACAGAGAACTGAGTTGTTT	scaffold17016:7950-CAAAT-i5	20706
SLG-1	DAFWA4542	0.35	56	AATTCAATATATCATGAAAGAATTAAGCATATTGATGATCAGATACACTTTATCA[G/T]AGACATAGTTGAGAGAAGAGTTTTAGAGTGGAGAAA	scaffold15885:6926	10014
SLG-1	DAFWA1852	0	85	AATTCCTCAACCAGCCTATAATGGGGCAGTATGACTGAGTTTAGTCACTATCGTCAAGATTATACTAAGGTAATTTTGTGGATC[A/G]CCTTAAT	scaffold32663:7771	34270
SLG-1	DAFWA6470	0	15	AATTCATACAATTC[A/G]GTGCATCTAGAGGCAATCAGGTGAGTTACCTAGAACTAACAGCTAATTAGGAAAGCTTTTGAAGCTTAATTGTAATT	scaffold89594:1813	7548
SLG-1	DAFWA4929	0	65	AATTCATCTTCTCCAACTTGAAGAACTGAAACTGGACTATGTTGTTCATATTCTAGGCAAGTTA[A/G]ATCTTCCTGTTAAGATTTACATACTTA	scaffold91525:19662	24355
SLG-1	DAFWA3126	0	76	AATTCCTGTAAAGATACAGTTTCCTACCTATATAAAATTTATATTAGTTATGATAGAAAAAGAAAGAAATTACTT[G/A]TAAATAAATTTTTTGT	scaffold16364:10754	23251
SLG-1	DAFWA4383	0	92	AATTCTTTGCAACATTTACTTATCCTCACCTCGTGCAATGAAGCCCAAATGACACTGTTGAACTCCAAAATAAAACTTCTATATTTGAATC[A/G]	scaffold32663:18585	34270
SLG-1	DAFWA5747	0	92	AATTCTTTGTCAGATGTATAACACTTTGACTATCATAGTAGATGGTTGTTTCTTCGAGTTGTATACCCAACTCTTCAATTAGATCTTTCTC[C/T]	scaffold15885:7069	10014
SLG-1	DAFWA6866	0	71	AATTCATATCAAGCAGATTTCGATACCTCCCACGTTCTGCTAGCTGAGAATCCAGGGTCTTGTAGTATGC[C/T]GCTCTCTTTTTCCATAACTCG	scaffold39498:17392	30905
SLG-1	DAFWA7878	0	59	AATTCAGTTCCTTTTGTTTATCAGCAAATAGTGATTCTAGATATTCAGCATCCTGCAT[A/G]AAGATGTTGAAACATCAGGCCATCCTGTCAAGA	scaffold39498:22105	30905
SLG-1	DAFWA5770	0	57	AATTCTTCATTCACATTCAACACCAAAATATTTATATTTTCCAACAAATCTATCTG[C/G]CCTAGACTCTACAACAATGTAATCAACATAATTCC	scaffold16364:382	23251
SLG-1	DAFWA4464	0	91	AATTCATTACACTATGAATAATGAATTAATACTTTTCGGAGTGTGTAACTGTCCATTCTAACAAGTGTCGTTCTCAAGAATTGAATTATT[A/C]A	scaffold15885:5960	10014
SLG-1	DAFWA6266	0	50	AATTCCCATCATTGAAGATGATTGTTGTAGCTGAGTTAAGAGATGACCT[C/T]TATGCAATGACCATGTCACCTATGCCACTAGCTGAGTCTTCA	scaffold39498:10485	30905
SLG-1	DAFWA7766	0	32	AATTCAATTAAATCCCTTTTTGAAATTCAAA[T/A]TGAAATTTGATGTGTTGTGTCATTAAGCCAAAAAAATATTTTTTATTTGTTTGTAATTTT	scaffold32663:10067	34270
SLG-1	DAFWA3001	0	11	AATTCTCCAT[T/C]CCCACTTTAGTAACCATTCAACAACAACCATTCACACTTCATCTTCAAAAACATTTTAATCACTTCTCTTTGCACATTAAC	scaffold39498:12940	30905
SLG-1	DAFWA3910	0	44	AATTCTTGACAAAGCGTTGACATTTTTTCGCAACAAAAACTAT[C/T]TGAGTATACCTATTTTAACATCTTGTCTTTATTCAAGTGGTTATTGTT	scaffold32663:7895	34270
SLG-1	DAFWA3405	0	92	AATTCTGGATTGGAACTCAACATCATCTAATAAATTAGAACCTAACATAATTCTAAATAGAATTGGCCACAAAAGATCAGGATGATGATGA[A/C]	scaffold91525:17547	24355
SLG-1	DAFWA593	0	86	AATTCTTGAGAAAATTGACAAAAATAAAAATTAGGATTTGAAAGAGCAGATGATACTAGCTCTTGCTTTCTTGGATTTGTTCTGG[T/G]GGTGGG	scaffold39498:18861	30905
SLG-1	DAFWA4908	0	17	AATTCAGTGAGTCATG[C/G]TAGAAGTAAGCACATCGAAGTGAGATTCCACTTCATTAGAGACTTGGTTAACAAAGAAAGACTACAAGTGGAGTA	scaffold230:13960	27204
SLG-1	DAFWA5047	0.718	28	AATTCTTATAGTGTGCAACCCTCCTTA[C/T]CCACCGCTTAGTGTCAGCCTCATACACATCAGCACCATTTTTTAGGTGTGTGGACCTCGGAGAT	scaffold22967:15736	35658
SLG-1	DAFWA380	0	9	AATTCATC[T/C]TTTTTTAATAAAGGTGAATTTGGATCTTTCTCCTACCCTGGCTTAAGATATTTCACGTGTTTGTGCCTATGTTGGACCACTAA	scaffold36413:268	27749
SLG-1	DAFWA6087	0.717	22	AATTCATAGCCTGTAACATAG[A/G]AAAACAAAATAAGCAAAAATAGAAAAAGAAATAATGTCAAATACTATTATTAACAAGATAATTAACGTGT	scaffold36413:6164	27749
SLG-1	DAFWA6578	0	33	AATTCTAAGATACATTATATTGTAATGTTAGA[T/C]TAATTATGCTAATGAACATTATACTTGTTGTTCTAATGGGAAGTATGTTCATTTTCATT	scaffold93235:11155	12894
SLG-1	DAFWA7846	0	75	AATTCAATGCTCAAGATAGCATTACTAGCGTGAGGCTCAGAAAAATACAACCATACCATAGAGTCCTCGTGTTC[C/T]TTCTATAGTTGTCATAA	scaffold29193:10425	12550
SLG-1	DAFWA1236	0	80	AATTCCCTTGCATTATAATAAAGAATTAATTCATTTTAAAATAAATGATTGTTCCTCTTACACTAATCGAATCATTAAT[C/T]TAAATTTTAATA	scaffold93248:265	2921
SLG-1	DAFWA7619	0	58	AATTCAATACAAAAACCTCAAGACTTAGATCAATATTTGCAGAGTTGAATGCCTTTT[G/C]TGAACACCCTTGGTACATTTGAAAGACAACTTTG	scaffold81927:14977	21230
SLG-1	DAFWA5405	0	15	AATTCAAACATTTT[G/A]TTATTTTTAAAAATAATAATTTGATACGTGTGTGGCTAAGATACTAATAAACGTGGTTATATGAGAAAATGATCACT	scaffold96719:840	1447
SLG-1	DAFWA1781	0	39	AATTCTGCATATTCCCGTTGGAATTACACATAATTGAG[T/C]ATATTTATCCCAAAGTGTTTGATCATAATAGAAGCAAGTTACATCCCTGAAAG	scaffold81927:20581	21230
SLG-1	DAFWA1995	0	20	AATTCCATGCCCCACCACT[C/T]TCAAGAATAACAAAGCCTCCTCAGAAGCATTTTCCACTTCAGCTTCTTTCGAAGATTTCTCTGTTTCAGCAT	scaffold81927:18739	21230
SLG-1	DAFWA1830	0	87	AATTCTTAGGATATATATTATCAATAGATATATAATCTATCAACAAGGCGTTAGTCTAGTGGTGTAAGGCCCTAGGAGGAACAATC[A/G]TAAAC
SLG-1	DAFWA6903	0	19	AATTCACTAACAATATCA[C/T]TGAATATGAAGCGTGCGTCAATGGACTTCTATTTTCATATGAGCTAAATGTCAAAAAGTTGAGGGTATTCATG	scaffold29193:4979	12550
SLG-1	DAFWA8705	0	86	AATTCTTGCTAAGAATTACCCTACCATATCCATCAATAGTGTTTGCCCCGGTTATGTCAAGACGGATATAACGAGCAATACTGGA[A/T]TCTTAA	scaffold81147:2567	4574
SLG-1	DAFWA3783	0	73	AATTCCAAATTTCCAATTACATAAACTTACATATGTTATAGCTGTCAAACAAGATATATTTCAAACATACTT[C/A]TTACATTTATTTATTTAAT	scaffold45471:17525	21671
SLG-1	DAFWA5652	0.264	54	AATTCACCAAGAATGGTCACCATCTCTGCGTCGATCCAGTCCTCCTAGGAGGC[A/G]CTCCCCCAAAAAAGTCAACATGAACGTCCTCCAAACAA	scaffold36413:24019	27749
SLG-1	DAFWA3378	0.149	57	AATTCTCCAAACCATCAATCCTCTTCAAGATCCAACATCTCCTTTCTTCATACCCC[T/C]GAATGAGAACCCTGGAATTTCTCTCGTATCTGCTC	scaffold41201:1560	2289
SLG-1	iDAFWA754	0.3	45	AATTCTATATAGAGAGGAAATAAATAAATAAAAGAAAAGGAAAAACATGTGATATTTTTTACCCTTTTAATTTTAAATATAATAAGATAATA-AATTCTATATAGAGAGGAAATAAATAAATAAAAGGAAAGGAAAAAACATGTGATATTTTTTACCCTTTTAATTTTAAATATAATAAAATAAT	scaffold45471:12602-A-d1	21671
SLG-1	DAFWA682	0.717	51	AATTCAATCTTTCCTAACAGTAACTTGTATCTTACTACCTATAATACATA[G/C]AAAAATTTATTATTATAAAAGAAAAATGTATAAACTAAATG	scaffold28156:6533	6952
SLG-1	DAFWA4496	0	45	AATTCAAATTCATTCATTACTTACATTATCCATTAAATTATATT[C/T]GTATAAATTTATTAACTCTAATGCGGATTTATATGAATTTAATTTTC	scaffold47339:11889	19895
SLG-1	DAFWA4750	0	24	AATTCACATTTACTGTTCTAGTT[A/G]TAACGGATGTAGTAGTTTCCACTTTTCCACCAGATTCGTCAACCATTATTAATCTAATTAATCTAATA
SLG-1	DAFWA2421	0	43	AATTCCTGACTTGTTTACATTTTTGACACATGTCACAGGAAT[A/C]TTGTGTTTCAAAATCGAGTTTTGGAATATCAATTACTAAATTATTTTTC
SLG-1	DAFWA2342	0	35	AATTCATATGCACCAAAGCTATATTTCATCCTTG[C/T]TATACTTGAAGCCATATGAAGAAGTGTGATTCATAACCTTAGGAATGAGTTGGTCTT	scaffold66061:1194	2046
SLG-1	DAFWA2564	0.718	23	AATTCAAAAATAGTTTTTTTAT[T/C]ACAGAATAATTCACACTATAATGGCCGCAATACGCATCGCAACGGTCACAATAACTGCAATCACAATAA	scaffold47339:8072	19895
SLG-1	DAFWA2097	0	48	AATTCCTAACAGAAAATATTCTGTGGAATTTGTTAAATAGGACCCTA[T/G]TGTAATGATGTGGGGTGTGAAACCATTGAGACAGTCTCTTCCTT	scaffold9686:5934	10619
SLG-1	DAFWA8138	0	66	AATTCTCTCTTTCTTGCTTCTTCTGTTTTCCTGAATAGTTGGATCTCCAGCCACGTGTCCTTGCC[T/C]ATGTGATGTCATTACATTTCCCCCTC	scaffold9686:9008	10619
SLG-1	iDAFWA182	0.718	67	AATTCAAACTTTTGGAAATATGCTTTCATAACTTCCTCACTTTCATAGTGGCTCATTAATATCTAAAACAATTAATTTTTAAATACTTATTG-AATTCAAACTTTTGGAAATATGCTTTCATAACTTCCTCACTTTCATAGTGGCTCATTAATATCTAAACAATTAATTTTTAAATACTTATTGT	scaffold74635:1135-A-i1	1628
SLG-1	DAFWA2934	0	57	AATTCCTAATTCTGGGGATTAATATGATTAGTGTTTACAATTTTAAAGACAAATAA[C/T]CATTTCATAAATAATATACTCATAGGATTGGTGCT	scaffold95292:6800	9845
SLG-1	DAFWA7792	0	61	AATTCATCATAAAGGATCTAGGTAAGTTAAAAATTTTCCTAGGAATGGAGATAACAAGAT[C/T]TATTCAAGGTATTTTACTTTGCCAAAGGAAA	scaffold50390:9405	14748
SLG-1	DAFWA7643	0	14	AATTCATGTCGTT[G/C]AGGTTTTCCTTTCTTGGGAAGAGAATTGTACAAAGTAAGAACCTTTTGGGATACCCTTTTGCCCCAAGTTGTTTCATT	scaffold41661:7032	23230
SLG-1	DAFWA5428	0.988	25	AATTCAAGTACTTCCCGCATCTGG[A/G]ATGCAGGAATCTACTTCATGATCCGATGTAAGCCAAATCGAGATTTTTGTTTTTAATTAAGTATCGG	scaffold83373:10633	22045
SLG-1	DAFWA2696	1.925	52	AATTCTAGCACCTTTGAATCAAAACAAGGGAAACTCAAGTCACATGGCAAA[A/T]TTTGTTGCTAAGACTACCATGCCCATTGATATGCACTCCT	scaffold12632:631	15052
SLG-1	DAFWA3248	0	60	AATTCCAATATTGAATACATGAGTCCGAATGAACGACAAACTATGTTAAGAAGTTCGTC[C/G]ATGAATTAGTCTCCCTTATAATAAAATTATAT	C28617312:361	1492
SLG-1	DAFWA6447	0	33	AATTCCTTACGATCATAGTTCTCTCATTCACA[C/T]TGAAGACCGAAACCAACAGTGCTACCTTGAGTGAGTATTTGACTGCACAATGAACCAAA
SLG-1	DAFWA3168	0	44	AATTCTTCATGAAGATCACCATGTAAGAAGAACTTATTGATGT[C/T]AAGTTGTTCAAGATGCCAGGTTTTTGCAGCTGCCAATGCTAACACTAC	scaffold12632:2611	15052
SLG-1	DAFWA8255	0	70	AATTCTATATGGTACCACCACCTAATTTATCTCTTCCTCAACCCAACCTAGTATGCAAGCTACACGAAT[A/C]TTTGTATGGTTGCAAACAAGTC	scaffold12632:2720	15052
SLG-1	DAFWA5555	0	47	AATTCTGTTTGTCAAAGAGGATATCTTCAGAACACTTAGCAGAAAC[G/A]TAGAAGTTTGGTCCATCAACTCTAAGGCTTTCAAAGAATGGAGAA	scaffold73071:21442	23355
SLG-1	DAFWA7274	0	77	AATTCGATGAAAATCGGAACTCTCTCGCTTGGGCAAGCAAAGGCCTCGCCCGGGCAAGCAAAAGCCCGCTTGGGCG[G/A]AAAAAAAACCAGGAT	#N/A	#N/A
SLG-1	iDAFWA443	2.207	25	AATTCATTGATTGAGGGTATTCACAATATACAGTATGAATCAGCACATTAAGCTAACTAATTACAATGATTAACTAACCATACTTAAGTTAG-AATTCATTGATTGAGGGTATTCACATATACAGTATGAATCAGCACATTAAGCTAACTAATTACAATGATTAACTAACCATACTTAAGTTAGA	scaffold99401:3322-A-i1	8738
SLG-1	DAFWA56	0	84	AATTCCAAGGGCTTTGGTAGTTAGCTTCATAACTCCTACCACATTTGAAAGTTGAAACTATATAATATTTTTGTATTGGGCTT[A/G]GGCTTCCT	scaffold96178:1791	12102
SLG-1	DAFWA2364	0	6	AATTC[T/C]TTTATGGTATCAGAGCACTCATTTTTTGAGTGCTCTGCTGTGAAACCATTTTGCAATAGTTACCGAGAAAACATCAAGACATGGAA
SLG-1	DAFWA5327	0.718	6	AATTC[G/T]ATTATTAGTGGGACATTGGAAGAGTTGAGACCAGAGCCATAAAATAAAACATCATATCTTAAACCAAAACCTTAAGATAATGATTT	scaffold36909:3069	3619
SLG-1	DAFWA775	0	86	AATTCTCATATTCGTTCAATCACTCCAAAGTATGACATGTTTGCATATAATGAGTTTCTATCTTTTGCACTTGACATGTGTAAAG[G/T]TCGAGC	#N/A	#N/A
SLG-1	DAFWA2755	0.378	61	AATTCTGAAATACCTCAAATCCTCACCTGCTCTTGGCTTATTTTTTTCCAACACAGAACA[C/T]AACAACCTTAAAAGGATTTTCAGACTCTGAC	scaffold23372:17160	23353
SLG-1	DAFWA7952	0.335	92	AATTCAACATACAACTAATGTATATACTTTCCTGTCATGTCTGCTTGGAACAAAATTTGTTTTTCTCTCTTCACTCATCAGAAACAGCAAA[A/C]	scaffold91452:5487	17635
SLG-1	DAFWA2775	0	42	AATTCAAAGACTTGTGTCAGATGAAATTCTCGACCCTTTAG[A/G]TTTATCAGACTTTGAGGTATGTGTTGAGTGCATAAAGGGAAAATAGACAA
SLG-1	DAFWA2598	1.453	58	AATTCCAAATAATCATTGACTGAGTACAATAAAAAAAGACATGACCAACATTTTAAG[T/G]TACCAGGCCATAAAAGGTACCCATCAAATTGGCT	scaffold65396:4166	22742
SLG-1	DAFWA2802	0.718	79	AATTCGTTAAAATGTTTTTAAATGATTTATGAGTTTAATGATGTGCATTTATCATATATCATTTTTACAATATTAATA[C/T]TAGCTTGTCCAGA
SLG-1	DAFWA8460	0.718	75	AATTCTATGGCAATTTTAGATATAAGGATGAGGTTTATTGAACAATGGTAATGGGGAAGATGATTGTTATGGAT[G/A]AAGAGTTACTTTTGGAT	scaffold4928:15718	50773
SLG-1	DAFWA8576	0	34	AATTCAGATTAGGATTAGGGTTAGGATGAGGAT[A/G]AGGATGAGGGGGAGGATGAGGATGAGGATGAGGATTAGGATTAGCAATAGGAATAGGA
SLG-1	DAFWA6031	0	80	AATTCGAGAATTGGCACTAATATCCATATTGTAAGTGTATTCGAGAGCGATTCTTATAATGTAGTAAGAAATCGTATAA[T/C]AGAGAACTTAGC	scaffold13849:6489	19111
SLG-1	DAFWA6602	0	32	AATTCTTCAAACTCAGCTGACATGTACTCAC[A/C]TTCACCATATGAGCTTAGTTGTTTCAGCTTCAGCTCACTCTTTCTTTCTATTTGAGATTT	C27748727:99	178
SLG-1	DAFWA1007	0	30	AATTCTCGTGAGCACTTGATTATTGACAA[T/C]CTAATCCACAAAATGGGAATTTATAAGTATGATAATGTCTAGCAGTACTAGGAAGATCATAA	scaffold42704:7990	10163
SLG-1	DAFWA236	0	32	AATTCTCTCATGCTCTAGCATCTCAATTGAG[T/C]GGTGATGAACGATTGTTAAGCTTTGATAGTAGAGTTAGGTATCAATTATGCTTAGGAAGA	scaffold18496:26628	29387
SLG-1	DAFWA7376	0	13	AATTCAATGCAT[A/G]TAAAGTATACTTTTAGCTGAAAAATATTTCAAACTGGGAAAATATGAGGTCTATTTAATTTTGATTCCAGAAAAAGTTA
SLG-1	DAFWA1991	0	66	AATTCCCCAACTGATTTCCCAGAAATCAGTTACACCTTTCACTAATTTCTCAAAAAGTGAGTCTA[A/T]CAACTCCTAACTTTCTATTTATACTT	scaffold30011:7471	25533
SLG-1	DAFWA5532	0	60	AATTCTGTATTTTGAAATTTCAATAGTTCTTGATTGTTGCAACTGATATAGGTTGTCCT[G/A]CAGATTGGTATACTTAAAAATTCATATGAAGT	C27618175:62	162
SLG-1	DAFWA8814	0	12	AATTCGAGGAG[A/G]AGGATTAGGGTGAGGATGAGGATCAGGATGAGGAGGAGGATAGGATGAGGATGATGATGAGGATGAGGATTAGGATACGA
SLG-1	DAFWA3483	0	10	AATTCTTTA[T/G]AGTCTCGCAGTGCCTTAATGCAAAAGAAATGTTGGATACTTTGCAAGTTACCCACGAAGGCACGAGTGAAGTTAAGCGCATT	scaffold30011:18384	25533
SLG-1	DAFWA4493	0	43	AATTCCTACTTTCTAGTTCATTTGTCAAGACTTTAAAAAGAA[T/G]AATTTTGGATCTTGAAATCAAGTTTTAGGTGATCAAGCTAAAACTACAT
SLG-1	DAFWA2254	0	61	AATTCCGCCTTCAAGTGTTTTTTGAGAGAATTTAGTGAAGAAATGCTCAATTACAATCTG[T/G]TTTGCTCAAAGGAAATGGCATATATTTATAG	scaffold20183:3530	4120
SLG-1	DAFWA6186	0	21	AATTCACCATGAAGGGGCCA[C/T]AGATAGAAAGGTGGTGCTTGGGCCCTTGACGGTGCATCGCTAATCCTGAGCCCATGGTCATGTACTAGATT	scaffold18824:5876	10297
SLG-1	DAFWA1329	0	15	AATTCCTCAAATGA[G/T]GAGTTTTGAAATTCTCCCCCATGATCACTTCGTATAACAGTGATTTTCAGAGATTTTTCATTTTGAACTCTTTTAGC	scaffold62607:42	2159
SLG-1	DAFWA7344	0	26	AATTCATTCAAGCCAGCACTAACAT[C/T]ACTGATGTTCAACATCGCTTTTTTTGGCCTCCTCTGTTGAAGTTAAATCCGCCTATCCAAATGGAC	scaffold2651:5126	13911
SLG-1	DAFWA6650	0	78	AATTCATCATACGATAGGGCCGATGTGATAATGTTTTTAGCTCGAAGGTTATGCTGAACCTTCCTACATTCATCATC[T/G]GTCCAAAGTATTTT	scaffold18875:6200	14412
SLG-1	DAFWA1710	0	88	AATTCTAAAATAGAAAACCTAACCATCCATGGTAAAATGTTGGAAACACAAATTGTCCAACAAGCTAGTAATCCTAATAGGCAAACA[G/C]TGGT
SLG-1	DAFWA8467	0	56	AATTCAAGTCAAGAAGGAGTGTGCCGTCCAAATTTATGTCTTTCCTCCATTATTG[A/G]GCCGTCCACAATTTGAACTCAATCGCCGCCCATCAT	C27116300:66	126
SLG-1	DAFWA4032	0	56	AATTCAGATGTGCTTTACCATTTTTTTGAGGACAAACAAAGTCTTAAGTTGGGGG[A/T]GTTGACAAGTGCCAAAAATGCCTAAATTTCATACAC
SLG-1	DAFWA6555	0	36	AATTCACCACTCATCTCGGTCATCATCTTGTTGTT[C/G]AAGTTTGTGGCATTGTCCGTGATGATCTTGCTGGGTAACCCATATCTACACACTAA
SLG-1	DAFWA8030	0	72	AATTCTGTGATGATCTTGGGATCAACCACAATTTTTTTGCTCCTAGAACACCTCAACAAAATGGTGTTGTA[T/G]AGAGAAGGAATCGGTCCTTA
SLG-1	DAFWA5148	0	14	AATTCAACTAGAG[G/C]AAAAAGTAAGTGATAAACAAGAGTCATGAGGAGGGTTGAAAATGAGTGTAACAGTTCAGTTCGAAAAGGATTTTTCAA
SLG-1	DAFWA3802	0	80	AATTCAAGAGGGATTTATCTAGTTTATCTATGTTGTTGTTGTAGCATAACAACCTTGACTAACCTAGTTTATCTATGTT[G/A]TTTGTTGGAGCA	scaffold10540:8011	24484
SLG-1	DAFWA2667	0	29	AATTCTATTTATTTACAAATTTAAAACA[G/C]TTATTGTCGCACCCCGATTTTCGGTTGCACGACTTGTTTAGAGTCGCCACTACATTTTATAGT
SLG-1	DAFWA4643	0	32	AATTCCCATAAGGAATTTACCTTGGATATTT[T/C]AGTTGGAACAATGTAAACCAACAATTTTATTTTCCTATAAGTGTAACTTTCGAATGGAGA
SLG-1	DAFWA1941	0	79	AATTCCTTCAAAGGGAAAAATGAAACGAGGACTGGTCGAAGAGCCTATATTGCTTGGGAAGACAATGATACTAGTTCT[A/G]CCTCTAAACCAGA	scaffold7700:13984	14837
SLG-1	DAFWA4390	0	74	AATTCCTCATCCTATCCTCATCCTCATCCTTTCCTCATCCTCATCCTATCCACGTCCTCATCCTATCCTCATC[C/G]TCATCCTACCCTCCTCTT
SLG-1	DAFWA5038	0	77	AATTCCAACAAATAAAATAAAGATAAAATTGTAGAAAGGGACATAGCGCATTATATATCAATATATATTGGGTTGC[C/A]TACCAGCAAGCGCTT	scaffold9380:21099	23501
SLG-1	DAFWA7514	0	23	AATTCTTCATTCATCAAGTCTC[C/A]TTTGTCTACTAGTTTGCTGGCAAGATAATCGGTAGAATACTTCCTTTTATGGCCTTCTGGGTGACATAT	scaffold6991:15510	32160
SLG-1	DAFWA4909	0	73	AATTCAGTGATGCTGATTGGAACACTCTTTCAAATGATTCCAAAGCAAACAATGGCTATATATTTAGAACTG[T/C]TTTTATAACGGTAAGAAAC	scaffold13849:7812	19111
SLG-1	DAFWA7689	0	80	AATTCCTAATCCTACCCTCATCCTCATCCTATCCTCCTCCTCATCCTATCCTCATCCTCATCCTATCCCCATCCTCCTC[C/T]TCATCCTCATCC
SLG-1	DAFWA6660	0	51	AATTCTATGTGGAGTATGTGTTTGTCATGCCATCTTTTTGTTCTTTCTTT[G/C]TAAGTATGAGCGTTCTCATAAGCATCCAACCGCAGTTCTTC
SLG-1	DAFWA5423	0	21	AATTCCAATGGTGGAGTACA[T/C]TTTAAAACTCTAATAAAAACTATATAAATTTGATCTAATTTGAATGGCAAATTAATGCAATGATGTCATCT	scaffold1199:27135	61535
SLG-1	DAFWA8821	0	64	AATTCGAGGAGGAGGATTAGGGTGAGGGTGAGGATAGGATGAGGATCAGGATGAGGAGGAGGA[G/T]AAGATGAGGATGATGATGAGGATGAGGA
SLG-1	DAFWA8791	0	83	AATTCCAATAGGATTCCTCTCTAGTACTGGACTCTCCAGTACTAGGGATGTGAGAGGATAAATTTTTTGAAGTTATTTAATT[A/C]AAAAATAAA	scaffold10540:19682	24484
SLG-1	DAFWA8213	0	32	AATTCATATGATTCGGTTGAGATGTACAAGT[C/T]TTGCCTACGAGGACCTCAATACTATGTGCAAGGTGAATTAACCAAGGAAGGTTCCTTATC	scaffold35721:24788	26144
SLG-1	DAFWA3244	0	77	AATTCCTAAAGGACTATGATTTTGACCTACAATATCATCCCGGAAAAGCAAATGTGGTAGCTGATGTGCTAAGTCG[A/G]AAATCATTACATATG	scaffold6991:26030	32160
SLG-1	DAFWA5111	0	51	AATTCCCAATTCTGCCATCTATGGTTGTTGCACGTAATGCATGACTAGGG[C/G]AAATTCAGGCTTGAAACGTTTTGTGGTTTTTTCCTATGATT	scaffold17090:7280	28611
SLG-1	DAFWA2307	0	77	AATTCTGCCATAGCATGTAACTGCAAGTTCTTTGTATTTATCATCTGCCCAAAGGATACACTGGTTTAAGCTGTAT[C/G]GTACTTTGCTTAGAT	scaffold2109:15426	25812
SLG-1	DAFWA5691	0	88	AATTCAACTATAATCACTTTAAGAAAAGAAGGAAGACTTGCTTAACATAATCAGCTTATTTGACTATTTAATAATATTTTTCATATC[G/T]GCTT	scaffold21429:13107	19512
SLG-1	DAFWA4712	0	73	AATTCTTTTTCGGGTTTGGACAGTCCATCTTCATATGACCAGGCTTGCCACATTCAAATCATGTGAAGTTTT[A/G]GTTTGAAGTAGAGGCATCA	scaffold1199:41431	61535
SLG-1	DAFWA5961	0	32	AATTCTACTTCCTTTCATTAGCAAACATATC[C/T]GGGAAAGAACTTCTCGAGGAATTTTTCTCGGAAGGTCTTCCCCATAATTTCCCTTTGTTC	scaffold6991:21109	32160
SLG-1	DAFWA6667	0	28	AATTCAAGAGAAGGAAGAGGTATTGTT[G/C]GTTTATGAATAAGGTGGCATAATGAAAGGCCTTTCAAGACAAACAAGCTTTAACTCCCTTGATC	scaffold10975:913	43078
SLG-1	DAFWA2818	0	36	AATTCTTGACTTGTTTACATTTCTGACACATGTCA[C/T]AGGAATCTTCAGTTTTAAAATCGAGTTTTAGAAGATCGATTACTAAGTTATTTTTT
SLG-1	DAFWA6586	0	57	AATTCACACATTCACAAAGCCTAATTTCAAGCTAAACGATCCTATAATTCTAAGGC[A/G]GCCCCTAGAGGTTGTCATCACCTATCCTCATCCTC
SLG-1	DAFWA8120	0	84	AATTCCAGAAAACTCCGAGAATCCTAATACTACAATTAGGATTCTAGTTTGAATAATTGAATGATCAGATAGTTGGGTTCACC[A/T]CTCGATCC	scaffold12362:9215	26712
SLG-1	DAFWA4936	0	80	AATTCTTATATTCCTTCCTTTACTCTCAACATTCTCTTACAATTTAAAGAGGTGAAATAGAAAATATCTATGATAGAAA[T/C]GATCTGCACCAT	scaffold30011:16598	25533
SLG-1	DAFWA401	0	11	AATTCAAAAC[C/T]ATGTATTAATATTTTACTTTAGTTCATTAATCTATTTGTCACATTATTGTACCACGAGACGTTGATATAATAGTGTAAGAT	scaffold83760:1593	3440
SLG-1	DAFWA4029	0	74	AATTCTTTTTCAGGTTTGGACATTCCATCTTCATGTGACTAGGCTTACCACATTCAAATCATGTGAAGTTTTT[T/G]TTTGAAATGGAGGCATCA	scaffold39589:6158	10572
SLG-1	DAFWA6583	0	29	AATTCTTGCAATGCGAGAAGAATTAAAC[T/C]AGTTTGAGAGAAATGAAGTTTGGAAACTTTTTCCTAGACCTAAAAATAGGCATGTTATAAGAA	scaffold4928:24359	50773
SLG-1	DAFWA6478	0	56	AATTCTTTCTTGAGGAAAAACTATACCCTGCCATTAACTGCACCCTAGTGACTCT[A/G]TTGCCAAAACATAATGATGCAAACACCATGAAGGAC
SLG-1	DAFWA646	0	29	AATTCCTAGGAACACCTACCAACCATTC[G/A]GACATGGACAATGGAAAACCTATAACTGCAATGGGAAAGACCTCAAACTGTGAGAGAGATTAG	scaffold6991:26630	32160
SLG-1	DAFWA4987	0	57	AATTCGACTAGGATTAGGATTACGATTAGGATTAGGATTAGGATTAGGTTTAGGAT[A/G]GGGATAGGGATGGGGATGGGGATGGGGATGGGGAT
SLG-1	DAFWA5090	0	6	AATTC[C/T]AGTAGGGGGATAGGATGAGGGTGAGGACGAAGATGAGGATGACGAAGAGGATTACGATAGGATGAGGATGGGGATGAGGATGAGGA
SLG-1	DAFWA7759	0	54	AATTCAGATTAGGATTAGGGTTAGGATGAGGATGAGGATGAGGGGGAGGATGA[A/G]GATGAGGATGAGGATGAGGATTAGGATTAGCAATAGGA
SLG-1	DAFWA6567	0	61	AATTCTTGGCCTCTTGATTTTGGAAAAGAAATCCATTTCAACTCTCATTTAAGGCTTAGA[C/T]AAGGTGCACCTAAGTTTGGTTTGGTTTCACT	scaffold10975:997	43078
SLG-1	DAFWA2081	0	82	AATTCAATTCCCTTCAACATGTCCTTAATGTAGTTTATAACCTTCTCCTAGTATTAGATTAAACTTTCAATCACACTTGAG[C/T]GATATAATCT	scaffold9192:50392	66119
SLG-1	DAFWA8514	0	44	AATTCAACAGAGCAATTGTTAGTATGGCATAATTTAGAGACTG[G/A]CAATAGATTAGAATGAATACTAGGAACACATAATACTTGATTTAGATA	scaffold10540:11121	24484
SLG-1	DAFWA4409	0	58	AATTCTAGTTGTATCTTCTCCTGGTTTATAGGCTTTGGTTACATTTTCAGACCTTCT[C/T]TTGTAATCTATTTAACCTGTTGTACACTCATAAT	scaffold10540:12427	24484
SLG-1	DAFWA6538	0	16	AATTCACTTATTTAC[C/T]TTTGATGAACATCTACGTACTTTTAAAAGTAATATATTTTGCTTATCACGTAAATTCAAGTTAATTGTTTCTGTCA	scaffold2339:5614	18903
SLG-1	DAFWA5344	0	47	AATTCTCATATGTTAATAATCTTGAAACTAAGTTGCTTGTAACATA[A/T]GCTTGGAAATGGAAAATATTTAAGTTTACCATTGTAGCATGATAA	scaffold33734:5888	6255
SLG-1	DAFWA3468	0	48	AATTCAACTGTTTTTCTTTAAAAACGTTTTGGGATTTTTCAGGGCCG[G/A]ACAATAATGGGTGTTCACAACTACCCCTCTTTACTTATTGCTTA	scaffold15558:7757	16544
SLG-1	DAFWA5799	0	43	AATTCTTATGCCACATATGTTGAGATTTCAGTTTATATAGAA[T/A]GCTGTCTAAAGTCCCAGTTAATCGATTAACGGGTTGTTGAAAAAACGGT	scaffold30011:19763	25533
SLG-1	DAFWA8172	0	24	AATTCCATTTTGTTCTTTGATTC[C/G]AAAGCCATGGTCATTGCCCTTGACCATGGATGATAATTTTCTCCTTTTAATAAGGAGGATACGATCAC	scaffold2109:6721	25812
SLG-1	DAFWA8850	0	48	AATTCTCCGTCATGGTCGGATCGAATGTAACTAATTTTTAGGTTAGA[T/C]TGGTTTTGGATTTGCTTGGCTAGATATTTGAAAGATTTATAGGC	scaffold14139:59	29318
SLG-1	DAFWA8020	0	61	AATTCATGACTAAAACCTCTTAATTCCATGTAGAGGGCACGGTTCACTTTGAATGAAAAG[G/A]TGGCCATTTATTTAGTTGAAGTCTTCATGAT
SLG-1	DAFWA7468	0	85	AATTCGCCTCGATGAAGATCTTCATGTGCACTTTCCAATAGGCGTACCCCTCACCACTAAATATTGGAGGGCGGTTGATGGATG[T/A]GCCATCT	scaffold10567:19809	34752
SLG-1	DAFWA5616	0	26	AATTCAGCTCCAATGCCTCAAGTTC[A/G]CTTTATTTGTTCAAATCACTCAAAATCCAGCTTCATTTGTTCAAATCTCACTAAATCCAGCTTTAT	scaffold82496:2293	8979
SLG-1	DAFWA6951	0	56	AATTCATTTCTGGTCCCTAATCACCAATATTCATACATGAAAAATCCTTAAATCT[G/A]TTTTAAGTTTCAGCCCTAAAAGATTTAATGAATCCA	scaffold10540:15437	24484
SLG-1	DAFWA283	0	12	AATTCTAACTA[A/C]AAATTACAAAGACTTACTTGAAAATGAAAACTCTAAACTAAGAAATGAAGAAAGATTTCCTAGATGAGAGAATTATGGCC
SLG-1	DAFWA1778	0	16	AATTCTGATTTTTGA[G/C]CATGAGGTAAAATTTTGCCAATTCCTCTTCTTCCGAGGTGCTAGAAATTGAATCCTCTTCGGGATTGTTCCATACC	scaffold22682:8450	14900
SLG-1	DAFWA6508	0	31	AATTCAAACTCAAGGCATGAAGATCCAATC[A/T]ATTATGAACTTTCCTTTTCAAGCATATTTTTGAAGAATCCGTCCATATCAAGGCACATTGA	C27837349:150	191
SLG-1	DAFWA1842	0	66	AATTCCGTGATATCATGCATATAGAAGCTATCAAGCACGGATACTGATACGTGTGTCGGATATGA[T/A]ACGTATCCGATACGTCGACATGCATT	scaffold82496:6286	8979
SLG-1	DAFWA5775	0	17	AATTCTTATCACAATA[T/C]AAGAGTGCATGCTTCTCATAGTTAACTCTGAAATTATCAAGCAGGTAAGTGAGCCATTATATCTCACAAAAAGTG	scaffold32101:1371	3161
SLG-1	DAFWA7125	0	46	AATTCTATTCATAACATTGTTGGGTACTAGCAGGTTAGAGTACAT[C/T]TAGAATAGGGGGTTGAATAGTTGTTGTGGATCACTTATTCCGCTTT	scaffold72995:5703	10379
SLG-1	DAFWA2703	0	54	AATTCTTGATGAACAATATCTTGATTAAAATTGTTTAGTTGTTTGCTTTATTG[G/T]CTTACCTCTATATGCCTATTTGTATTGTTTAAATGATA
SLG-1	DAFWA4214	0	68	AATTCTTGCTTTGGAGATTTGCTCAGCGAAAGCCCAGGGAGATGACTTCGCTCAACAAAATACTCAA[T/C]TCGCTGAAAGAAAATTACAGATTT	scaffold1199:34462	61535
SLG-1	DAFWA4866	0	75	AATTCTTTCGGGATCTCAGTGTCAAAGTGCCAAGTAGATGTGCGACACTTTACAAGTGACTCATGAGGGCACTA[T/C]TGAGGTCAAGCGCGCTA	scaffold9380:15914	23501
SLG-1	DAFWA4904	0	8	AATTCAT[C/T]AATGGAGCTTTACCTAAACCTCCTCCCAATGACCATATGTATTCAACATGGAAAAGATGCAACAATTTAGTTGTTTTGTGGCTT	scaffold2109:6694	25812
SLG-1	DAFWA5860	0	31	AATTCTATGCTAACTGTAGGTATAAAGATG[G/A]AAAGTATTGGTCCATGGTTTCTGGGAATATATTTGAGTTGAGTGGGGAAAATTTTATGAAT	scaffold9192:56633	66119
SLG-1	DAFWA5072	0	76	AATTCCTAATCCTAATCCTCATCCTCATTCTCATCCTCATCCTAATCCTAATCCCAACCCTAATCATAATCCTCA[C/T]CGTAACCGTAATCCTA
SLG-1	DAFWA2071	0	62	AATTCACACTGTCATAACATTTCCTCTCTTAGTTTAGAATCAATTCATTAGTTTTATGCCT[C/G]GAGACAAATTGCTCCCATAAAAATCTACTT	scaffold93699:1222	3282
SLG-1	DAFWA8407	0	77	AATTCAAAGAAACTATCCAATCGTTTGACTCCCTTCCTACCGATAAAGAAAACGTTTCTTTCGGCGTAGCCCCAGC[T/C]AAAGAATCTCTCATT
SLG-1	DAFWA2744	0	41	AATTCACCAATTTCCTGAAAAAATTGCTTAACAAAGATGG[A/C]ATATGAACTTCCATTAGAGAGGTTAGTAAATAAAAATTTCCCACAATGAGG
SLG-1	DAFWA7874	0	85	AATTCGGTGATGTGTTCCCTAAGGAGGTACCTCACGGTTTACCACCTATAAGGGGTATTGAACATCAAATTGATCTCATACCCG[A/G]TGTATCT	scaffold31582:13953	16650
SLG-1	DAFWA2245	0	11	AATTCAGCTA[C/G]ACATATTGCTGCAAATTCCGTGTTTCATGAAGGTACAAAGCATGTAGACATTTATTGCCAAGTGGTGCAAGAAAGGTTGCA	scaffold32101:1394	3161
SLG-1	DAFWA1967	0	70	AATTCAGCTGCCATAGAGTCCCTCACAGACTGAAAATGACCATCAATATGTGCATTGAGGCGTTTTTTC[G/A]TAGAATCCAAGTGAGCAAGCCC	scaffold12315:9075	16490
SLG-1	DAFWA848	0	53	AATTCAGTTCGACAAATTCTGTGATAAGCATGGCATTTTGCATCAGTTCTCT[A/G]CTCCTCGCACTCCACAACAAAATGGAGTTGTTGAGAGGA	#N/A	#N/A
SLG-1	DAFWA7118	0	45	AATTCATCATATGGTAGGGCCGATGTGATGATGTTTTTGGCGCG[C/T]AGGTTATGCTGGACCTTCTTGCGTTCATCATCGGTCCATAAAATTTT	#N/A	#N/A
SLG-1	DAFWA4136	0	85	AATTCCTAATCCTATCCTCGTCCTCATCCTATCCTCATCCTCATCCTCATCCTCATCCTCATCCTATCCTCATCCTCGTCATCC[A/T]CATCCTC	#N/A	#N/A
SLG-1	DAFWA2422	0.717	25	AATTCTTCATAATAAATTCGTTGC[A/G]CATATATTTTGATAACATCGTAGAAAAATCAGTCATATTCTCCCAACAACTAAATCACCTCCCCCCC	scaffold58039:3987	14964
SLG-1	DAFWA859	0.422	77	AATTCCTAAATTAGAGAATTCCGCCTTCAAGTGTTTTTTGAGAGAATTTAGTGAAGAAATGCTCAATTACAATCTG[T/G]TTTGCTCAAAGGAAA	scaffold20183:3530	4120
SLG-1	DAFWA6711	0.292	61	AATTCAATCTTATTAAAATATTCTCAATTAATATCATCTATATTTTTAAAATTTAAAATG[C/T]TAAATATAACACATTTAATTAGTTGATCTTA	#N/A	#N/A
SLG-1	DAFWA11	0	19	AATTCTAAAAAAAAATAA[A/G]CAAATGATTTTTGAAAAAATAGGTTCTAGAAACCTACTTCTTTTTCTCCCAAAAAGCCAAATAATAAAGTGAC	scaffold15558:7819	16544
SLG-1	DAFWA4301	0	29	AATTCGGAATAAGTAGTGACAACCTTAT[A/T]TCTTTCAAGGATACTTGATGGTTAATAATGTATTAAGCAAGGTTTGAAAACCATCTTACCTGA	scaffold10478:16733	50382
SLG-1	DAFWA6742	0.306	32	AATTCTTCCCAAAGAATTAGGAAATCTTAGA[C/T]TTTGTTACTTGCACTTGGTTAAAGCTTTGCTTGGGACTCAAAATTGCCATTAAACTCAAG	#N/A	#N/A
SLG-1	DAFWA7512	0.407	21	AATTCCTCATCCTATCCTCA[T/A]CCTCATCCTATCCTCGTCCTCATCCTATCCTCATCCTCATCCTCATCCTATCCTCATCCTCATCCTCATCC	#N/A	#N/A
SLG-1	DAFWA2531	0.4	11	AATTCCTAAT[G/C]CGAATCCTAATCCTAATCATATACCGAATCCTAATCTGAATCCTAATGCTAATCCCAATCCTAATCCTAATCCTAATTCCA	scaffold4689:7318	8985
SLG-1	DAFWA4572	0.314	6	AATTC[G/A]TTCCCGAATATTATCGGGTAACTTCGTCCGAAAATATACGATCTACCGATTTAGGTTTTTTGCCTGAAACATCGAAACTTGAATTT	#N/A	#N/A
SLG-1	DAFWA3370	0	48	AATTCGTGGACGAAACCTTTCCAAAACCCCTCCCTCATGATCCAATG[C/T]ATGCCGCCTAGAACAGATGCAACAAACTTGTTGTATCATGGCTT	scaffold86983:742	3704
SLG-1	DAFWA2061	0.342	78	AATTCGGTTTTGTCAAATTAGGGAAATTTTAGGGTTGATTTGCTTCGGGTTGGGGTTGTATAAGTAGGCTAGGGTTT[T/G]TGTATGGTTTGAGG	#N/A	#N/A
SLG-1	DAFWA3162	0.371	52	AATTCCTTCCAAAAAGAACTCACAAAGAGCTTATCACGGTCAGACATGATA[G/A]ACCGTGGGACTCCATGTAGTCGTACTATTTTAATCAGAAA	scaffold6382:8120	9694
SLG-1	DAFWA7038	0	36	AATTCGATTAGGATTAGGATTAAGTATAGGATTAA[T/G]GTTAGGATTAGGATGAGGATGAGGATTAGGTTTAGAATTATGATTAGGATTAGGAT
SLG-1	DAFWA356	0	16	AATTCTCAAAAATGA[T/G]TTTTTCAAAATTATTCTAAAAATAATAATAATAAATAAAAATAAAAGGTGGATGAATTAAAGATTTAACTGGATTA	scaffold9021:1742	25784
SLG-1	DAFWA8624	2.207	57	AATTCTTTAGAGTTTCACAATGTAAAAGTGCCAAAGAAATATGGGATACTTTACAA[G/T]TAACCCATAAAGGTACTAGTGAGGTCAAGCAACCT	scaffold4739:32994	37153
SLG-1	DAFWA4475	0	74	AATTCCCAGACTAAAACAAATTCTATTCTTATAAACAATACTTGTTAAAAGAGACATATGAATTAGTTCTTTA[G/C]CCATAGGATGAATGAATA	scaffold18387:21560	38861
SLG-1	DAFWA2693	0	72	AATTCCATAACCAAAACTTCCCCTCGCCAAGTCCCTCGCCCAAGCGAGAGGGACTTGGACATAATACCAAA[A/T]TTTGCCCTTTTTCGACAACG	scaffold73686:62	1121
SLG-1	DAFWA7406	0	27	AATTCAAATTAAATATTTTCGGTCAT[A/G]TACCTCGATGAGCATTCAATTCAAGAATTATGGGTCATGTACCTTGATGAGCATTCAATTCATGC	scaffold13356:568	6148
SLG-1	DAFWA832	0	36	AATTCAATTCATGTGAGTGACACTTGTTGAGACGG[G/A]CAATTACACACCCTGAAAGTGATTAGTTCCTTATCCAAAAGAGTGAAAGAATATCA	scaffold6087:13735	14864
SLG-1	DAFWA5432	0	39	AATTCCACCCGAGAGTAGTGTTGCTTGTCCATCGGATG[C/T]TGTATAGCATCAAAAACATAAAACTTCACCTTTTGGTCTTCAACTCTTACCTT	scaffold10933:13997	33138
SLG-1	DAFWA1146	0	27	AATTCCTCAAAGATTATGATTTCGAT[A/C]TTCAGTACCACCCTGGAAAAGCAAATGTCGTAGGTGACGCATTAAGCAGGAAGTCGTTGAATATC
SLG-1	DAFWA1062	0	24	AATTCAGATGACACTACCTAATT[T/C]GTCTCATTAGTCATTATCATCAATAACTTCTATTTGTGTATAATATCCAATTGTGTATATGGTAATAA	scaffold51729:5529	6527
SLG-1	iDAFWA386	0	61	AATTCCATGTTTAAACAAGCATCATTTAGCTTTAAACGAGTAGCGACACCCTTACTTATGTCGCCAATGATGTTGTCAATAGGATGGTCTCG-AATTCCATGTTTAAACAAGCATCATTTAGCTTTAAACGAGTAGCGACACCCTTACTTATGTGCCAATGATGTTGTCAATAGGATGGTCTCGA	scaffold8027:26532-C-i1	35916
SLG-1	iDAFWA439	0	56	AATTCACGTTCTTGTGAATCTTCGGCACATACATCCTTGTGTCTAGACCAACAACATGCTTCTTCAGAAAGTGCCCCGATTATCCATCCTCA-AATTCACGTTCTTGTGAATCTTCGGCACATACATCCTTGTGTCTAGACCAACAACAAAACAATTGCTTCTTCAGAAAGTGCCCCGATTATCC	scaffold35914:512-AAACAAT-d7	7049
SLG-1	DAFWA3694	2.498	56	AATTCCTAGTGCATCATTGCCCAATAGGCCTGCCTAAAGGAGCAATCCTCAGGAG[A/T]CTAGCGAAATACAAAAGCAAGTCGAGGAATTTATGC	scaffold13603:3973	34643
SLG-1	iDAFWA159	4.325	42	AATTCAGTCACAACAGGCAATACCTATATGCTGAAGCATGATAGATCAAGTGAACTCTTCCCATTTCTTTTATTCATGCAAAATAAGATTAC-AATTCAGTCACAACAGGCAATACCTATATGCTGAAGCATGATGATCAAGTGAACTCTTCCCATTTCTTTTATTCATGCAAAATAAGATTACA	scaffold86930:27794-A-i1	32129
SLG-1	DAFWA5960	0	10	AATTCTTGG[A/C]AAACAAAACAACCAGCTTCATTTGATCAAAAAAGTTAGTTTTGTATTCCTATGAATTTCTGTTGTTGCATGCTAGCGTTATT	scaffold86930:27842	32129
SLG-1	DAFWA6334	2.207	64	AATTCAATAGCTGGTACAATAAAATTCGAACAAATATGATGGATTTAACACCAAGAACAAAAA[C/A]GTTTGTATGTCAACTATTGTCTAAATAT	scaffold26541:26414	37630
SLG-1	DAFWA8205	0	89	AATTCATTCTGTCAGAGCTCTGCGGTAAGAATATTGGTGATGGCACCATTGAAGATGGTTGAGAATAGCTAAGCGATGAGTTTATTCC[C/A]GAA	scaffold66490:16100	19548
SLG-1	DAFWA2575	0	34	AATTCTGAGGCTCCTCTAGATCTTCTTCCTACT[G/T]AGTAGATACACGTAGTTGGTCTTGTGAAATAGACTCATTGCTCTTCTTTGTTGTCTTT	scaffold26541:26507	37630
SLG-1	DAFWA1896	0	46	AATTCTCTTTATTTGGTTGTGGGATTGGTTTAAGTTCTAAAAAAA[A/G]TGTATTAAAAAACATAGCCACATATATATAAGTATGTGTTATAGAA	#N/A	#N/A
SLG-1	DAFWA1349	0	34	AATTCGGGTATTCTACCAACTGAATCATTATTA[C/A]AAATATTTGTTGAATAATTTTATAGGATAATATATAATTTTCCACCGTAATATCTATA	scaffold26541:22412	37630
SLG-1	DAFWA1479	0	57	AATTCTGTACATATTTATTTGTACTATTTCGAAAACTAAATCTATTATTGCTAACA[G/A]AAGTGGTTTGAGTATGTTCAAGCACATAGAGCCCC	scaffold9267:1672	6543
SLG-1	DAFWA6446	0	88	AATTCTGATGGCTTTAGATGGCGTAGGAGTTCCAATGCTATTATGATTGTTTCTGATCTTCTCCCCATCTGCAAAATCAGGTAGCGA[C/T]AGCT	scaffold26541:32227	37630
SLG-1	DAFWA8660	0	15	AATTCAATGCCATT[A/G]TCAGTTCTCAAGATTTTCAGTTTGGTATTGAATTGAGTCTCAATGTAGGCAAGAAAGTTGATAAGGTGAGATCTGGT	scaffold9267:2108	6543
SLG-1	DAFWA4246	0	13	AATTCTTCTCTC[G/A]TCATGTGTTGCTTCATCTCCTAATAATCTCAAAGCATCAGGTGCATGTACTGCCATTATGCATCCATCATATATTTCTT	scaffold26541:15745	37630
SLG-1	DAFWA4017	0.717	32	AATTCATTCAAGGGTCTTGTCAACAAATTGA[C/T]AAAGATAAATATGAAGATAGATGATGAGCTGCAAACATTTCTGCCACTAAGTTCATTGCC	scaffold38181:7499	8437
SLG-1	DAFWA7860	0	21	AATTCTACAGAATGACTCAA[G/T]GTGATCAATCTATTTCTGATTATTTCATTGAATTGAAGATTCTATGGAAGGAAATTGAGAATTATAGAGCC	scaffold2222:7051	16962
SLG-1	DAFWA4770	0	54	AATTCCAATGATGTCAGCACATTGGCGATCCCCGAAGACAAATCTTCCGCTGC[T/C]ATTTAGGTGAATAACCTTAATATCCAGTTTGTACCTAA
SLG-1	DAFWA8575	0	66	AATTCTTTTCTAGGTTAAGTCCAAAGTCCTTAAGTTGTTGCTTCATCCAATAGCGCAACACACAC[T/C]GACGACAATGTATTCCGCTTCGGCTG	scaffold5069:5091	8635
SLG-1	DAFWA5068	0	61	AATTCCTTATGATTGGTGAAATATCAATCCTAAGATCTTGAATCTCATGATTCTCACATA[T/C]ATATATGAAACAAAGAGTGCAGTGTCATACC	scaffold14629:5292	15349
SLG-1	DAFWA3191	0	63	AATTCTCATGTATCTTTCAAGATCAAAGGTAATTGTTTAATTATTGTGAGTGACGTTAGTTG[T/G]GTCACACACCCAAAATTATTTGTTTCCAT	scaffold64276:420	8471
SLG-1	DAFWA6231	0	45	AATTCAGTTATTTAACAAAGTAACTATATGTGGCATATAGTAAA[C/A]TAGTCCCCATGTTAAGAATGTGGCCAACAATTTTCAGAATATGAGAA	scaffold98604:3960	5537
SLG-1	DAFWA4755	0	51	AATTCAATAAAAGTTTTATTTATGTAATTAATTGTCGCGGCCCAATTTTC[A/G]GTTACGCGACCTCTTAGAGTCGCCACTACATTTTATGGTTA	scaffold3679:1952	18817
SLG-1	DAFWA371	0	35	AATTCAGTAACATTTCATATATTGCAACTTGCAC[C/T]CCCTGACTCTATGTCCTAGATCCATCATTATTCTAGAAAGAAGATACATAAGATACA	scaffold64276:4843	8471
SLG-1	DAFWA1683	0	37	AATTCAACTAGACAAGCTGATCAAACCTAGAATGGA[T/C]ACCAAATTGGTTGAAATTGCTCAATTGATTGGCTATGAGCTAAAATCGGTATGCA	scaffold64276:4776	8471
SLG-1	iDAFWA286	3.773	67	AATTCTATTTTCACTTGCATGTAGATTTTATTTAATTTCTTATGATAAATAAGAATTTCATTTTTTTCTCAAAATGTCAAGACCAACCCTCT-AATTCTATTTTCACTTGCATGTAGATTTTATTTAATTTCTTATGATAAATAAGAATTTCATTTTTTTTCTCAAAATGTCAAGACCAACCCTC	scaffold80964:3868-T-d1	4285
SLG-1	DAFWA7677	0	42	AATTCGAAAGGTTAGAGGGGCTGTGCCTCATGATTTGGGGA[T/C]GCATGATCCATGGCATGAAATGAATGCTTATAATATTCATGATACTAGCA	scaffold23070:12483	32977
SLG-1	DAFWA2674	0	9	AATTCCAT[T/C]GGTGGAAACTCACATTTGACAGGAGACCATGTGAATGAACCGTTCATGTAAGTCCCTTCCTCCTAATTTGATATATGTATGCT	scaffold23070:7842	32977
SLG-1	DAFWA2338	0	26	AATTCTGCAGAAAATTAATGTAGAC[A/G]ATTATTTATCCATGGCCCAGTTATTGCATGATTTAATTTACAAATGAGCATCGTGTGTCTTTTGTG	scaffold23070:7812	32977
SLG-1	DAFWA5453	0	76	AATTCCACATCTGACCCAAATGAGAGCCAATGAGCTAACAAAGGAAAAAGAATCATATTATCGTCATCATTTGTC[G/A]GTGGTAGAAGATATAT	scaffold61224:18511	21510
SLG-1	DAFWA7669	0	44	AATTCTACTTAGAAGCATGGTGCACCATATTAAATTGGACTTA[A/G]GATTAATTGTTGCATAAGGTGTGGACTTAGGGTAGCAACTAGAAAGTG	scaffold60128:3899	10162
SLG-1	DAFWA5557	0	67	AATTCAATATGCCTAACTTTTACACAGACAATGGCATGTTGCATCAAACCTCTTGTGTAGAGACCC[T/C]TGAACAAAATTCTGTACTGGAAAGA	scaffold58397:4171	14459
SLG-1	DAFWA3633	0	71	AATTCATGGCCTGCTCAGGAGTATATCAGTAAATCCACTTTACACCTCGTAAGTGTTATTTTATTTCATT[C/G]TTTTGTTTTCTTCCTCGGCGA	scaffold23070:3361	32977
SLG-1	DAFWA790	0	66	AATTCCCTCGCTTGGGCGACAGAATCTCGCTTGGGCGAGCAAACCTCGCCTGGGCGAGAAAGCCC[A/G]GGATTTTAATGAGTTTTTGTAACTCT	scaffold53481:501	917
SLG-1	DAFWA3108	0	67	AATTCCAAAACCAAAACCTCCCCTCGCCCAGTCCCTCTCCCAGGCGAGAGTTTCTCGCCCAAGCGA[C/T]AGGGACTTGGACAGAATACCAATTT
SLG-1	DAFWA5314	0	60	AATTCGTGATTTGTGAGGTTCCAACTGATCCAATCTTTCAGATTTTTATAAAAAAATGA[T/A]AAAAACTAAACCTGCCTAACTGTATAGGCACC	scaffold84605:6344	7325
SLG-1	DAFWA3757	0	65	AATTCTTAATGGTTTCACTATGACTAAACTGACAATAGACACCAGCAATGACATGCCAGACTTT[T/C]ATCGAAGATTACTCAACTGCAATGCAA	scaffold23070:11868	32977
SLG-1	DAFWA3455	0	73	AATTCATAGGTTTTCTTTCAATTAGGAAAGAACAATGTAGGAGAGAAGATCAGAAGATAAAGTATGAGTACA[A/G]CAAAGAGAATGAATTGAGA	scaffold97291:400	6223
SLG-1	DAFWA3583	0	84	AATTCTCGATTAAACCATTCTCGAGTATTGTCAGCTAATACCCAGTCGGATAATAAAAATCTCCCGATTTTGGTTTACGGTTA[C/G]AACTTCGA	scaffold61224:567	21510
SLG-1	DAFWA2720	0	75	AATTCTAGTGATGATCCTTTTGAATTTTCCATAAATAAAAGATATTACTATTTTATATATGATTAAACATGGGA[G/A]GGAAAGCTATCCAAACA	scaffold40680:831	6883
SLG-1	DAFWA1836	0	39	AATTCTATAATCTAATATATAAATTAGATTCGAGAGAT[G/T]TTCAGGTTCAAGTATCACTTACACCAAACCCTAACCCCATATTTAAAATCGGA	scaffold21450:3698	7515
SLG-1	DAFWA2972	0	10	AATTCATAA[T/C]ATTGTATATATTGCGAATTAAAATGTACATATATAAATATATATTTGTTTTCAACTTGAGGTTGTTGTGATCCTGGAATTAT	C27913411:146	204
SLG-1	DAFWA8825	0	57	AATTCTTATGAAGATTTTTTAATATTTTGGCTAGAATCTAAGTAATAATGATTGTT[G/A]TTCCTGGTTTGACTATGTATTGAATTATATTTCTG	scaffold82934:6398	11870
SLG-1	DAFWA3041	0	68	AATTCCATGTTAAAACATATTTGCTCAACCTAATGTCCAGTCTCATTGTGCAGCACTATGAACCTCA[C/T]AAACTGCAAGCATCTAAGTAAAGT	scaffold82934:6278	11870
SLG-1	DAFWA5287	0	69	AATTCTTTGATTTTTGTGCCAGATTCTCCTCTGCTAGCTTCGAATATGGTTAACGACCAGGGTCAGTC[A/G]AAAGAGTTGGAATGTTCAACTGT	scaffold23070:11997	32977
SLG-1	iDAFWA580	0.114	63	AATTCTTTGCTGAAATTGAAGAGACTCAGCAAAGGCAGTTCATTGAGAAGTATGCTGCTTTCACATTAGTAGTTTGATTTGCTCAGCTTTTT-AATTCTTTGCTGAAATTGAAGAGACTCAGCAAAGGCAGTTCATTGAGAAGTATGCTGCTTTGAATTAGTAGTTTGATTTGCTCAGCTTTTTT	scaffold77862:1811-C-i1	3214
SLG-1	DAFWA7690	0.014	34	AATTCGACTGCAAGGACAATGTTCATCAAGTCT[T/G]TGGATGGGTTTGACTTTGTAAAAGCCGACGATAAAATATTTGAGTTGCTTGATGCTGT	#N/A	#N/A
SLG-1	DAFWA909	1.157	48	AATTCCTTCCATAAGTAAAATATCTTAACTCTCATTATTCTTGCATA[T/C]TATTCTCTATATTCTCATACATCTCTCATATATTGACTTAAGCT	scaffold32530:13510	13582
SLG-1	DAFWA8318	0.213	51	AATTCACTATTATTGGATAATGTGAATGTGATAGCAATTAGCATGCCTGA[G/A]AAGATGTATCCATGAAACCATTTTATACTGAGGTTTGAGAT	scaffold47808:11569	20297
SLG-1	iDAFWA586	1.979	16	AATTCTCAACCTTTTGAGTCAAAGCAGGCATGGTCCAAATCATGTTGTGAACTCTACTACAAATACTGCTCCTCCAGGTATTTTTGATACAA-AATTCTCAACCTTTTGCAGGCATGGTCCAAATCATGTTGTGAACTCTACTACAAATACTGCTCCTCCAGGTATTTGTGATACAAAGTGGCTC	scaffold87451:2035-AGTCAAAG-i8	7623
SLG-1	DAFWA5491	0.508	20	AATTCTGTGACGGTGATCA[T/G]GCAACTGGTCACTGTTCTATTCCTAGAAACAATCATGAGGAAGAGGTTCAATATGTGAATAATAAGCATCGT	scaffold46661:897	4499
SLG-1	DAFWA3305	0.364	31	AATTCGAAAATCATAAATTTGATAAATTCT[A/G]TGCTAAACATGGTATTATGCCTCAGTTCTCAGCACCTCGTACCTCTCAACAAAATGGAGTT	scaffold24580:3913	6814
SLG-1	DAFWA8458	0.056	42	AATTCGTCGTATGATAGGGTCGAGGTAATTATATTTTTCGC[G/C]CAAAGGTTATACTGAACCTTCTTGCGCTCCTCATCGGTCCATAAGCTTTT	#N/A	#N/A
SLG-1	DAFWA1189	1.401	22	AATTCCCTAAAAACTATATTA[C/A]TTCCGTAAATATTTTGAAACATATATCAAATATATGATAGTGTAGTTTGACTACACTATCCATGTAAATT	scaffold16392:8306	9376
SLG-1	DAFWA6646	1.394	88	AATTCAACAAATATATTTTGTATCTTTTTGTGATGGACTAATCATACCATAGAAATATGTTTTCTTAAACATGGAGACCCTCATGTT[C/T]TCAA	scaffold35157:12899	22624
SLG-1	DAFWA4118	0.085	79	AATTCAGTGCTTTAACTGCAAGAGATGGGGCCACTTTGCATCAGAATATAAACTCAGAGTGAAAAGCAAAGATGTAGA[G/T]GCAAGTCTAGCCA	scaffold14479:5715	18156
SLG-1	iDAFWA610	0.321	46	AATTCCATAAAATAACCATAACAATTGGTATCTAGAGCTTTTTTTTTCTGGGCAGGGATAGCAGAGTCCACGCATATGCAAACTGCAGCAAG-AATTCCATAAAATAACCATAACAATTGGTATCTAGAGCTTTTTTTTCTGGGCAGGGATGGCAGAGTCCACGCATATGCAAACTGCAGCAAGA	scaffold48848:12519-T-i1	15063
SLG-1	DAFWA3257	0.4	25	AATTCAATATATTATCATTATGTT[A/C]CCCTCCATTCTAATACTAAACAATGCTTCATATAATAACATATTTGAAGCATCCCAACACATTTATT	scaffold70293:1501	18449
SLG-1	DAFWA7012	0.421	24	AATTCTCATTATTTGATCGAGGC[T/A]TGAGATGCCTTATTTATAGTACATGAATATGAAAATAAACTTACCTAACTAACTAGCTAACAAACTAA	scaffold35157:21155	22624
SLG-1	DAFWA4635	0	75	AATTCCTAAAGAAAGAAAATGGAATCATTATGCATAAGAGGAAGTACACAACAGATGTGCTAGACATATTTCAA[A/T]TGCAAAATTATAAACCT	scaffold49752:9169	11095
SLG-1	DAFWA2236	0	10	AATTCCTTT[A/T]AAGTGACGTGGCAATGTATACTTTTAAATGTTGACAATTACAGATCAATTACAATAATAAACGTGATTTGGTCTTAGAAAAA	scaffold50915:1238	11680
SLG-1	DAFWA3986	0	31	AATTCAAGGGTCAAGATATCATTACTAGCC[T/C]GAGGCTCGGAAAAATGCAACCATATTATGGAGCCCTCGTGCTCCTTCTATGGTTGTCATTA	scaffold64536:4180	13200
SLG-1	DAFWA6017	0	92	AATTCTTAGATACCTAAAGGGAATCATCAATTTTAGTGTATTGTTCTCTGTCAATAGAGGTAACAAACCAATCTCAGTGTATGGTTATACT[G/T]	scaffold14479:3024	18156
SLG-1	DAFWA6818	0	31	AATTCTATCTCTCAATCAAAGGCTAAAGGA[G/T]GCCTTGGTATCCGCAGCGCTCGTTGGAATAATGAAGCTCTCTTGGGGAAGTTGGTCTTTTC	scaffold98605:1468	3062
SLG-1	DAFWA8028	0	7	AATTCA[A/G]TATCGCGAGTTGAATACAACATATTCATATCTTCGTCATCTACCCACTCTTCATTTTCATATGCATCTTGAAATTCTTCAGTTGC	scaffold27536:14245	19449
SLG-1	DAFWA8071	0	28	AATTCTTCTTAACCAGATGTTCGAGTT[T/C]TGCATTTTAAAAGAATTGAATGACGAGGAAGTCTATAGAAATTTAAAGATGAAGGAAATAAAAA	scaffold64536:4126	13200
SLG-1	DAFWA6245	0	51	AATTCTGTCTACACGCAATTGGAATCTTCTCTAGGCCAACTTATCTAGAG[T/A]AAAGCTTCTAATCAGTGTGGAATTGAATTATTTTAGCATTC	scaffold76460:1451	5584
SLG-1	DAFWA7275	0	7	AATTCA[G/A]CACACAACCTCTTTCTTTGTGAGTAAACAGTAGTCTGAACGAAGTTCCTCAAGGTTTGATAATGATTATCTATGTAGGCAATCTG	scaffold3103:15289	31604
SLG-1	DAFWA8678	0	11	AATTCATCAT[A/C]ATATTCATTTTACGCTTTCGTAATATTTTCGTCATATGGTATCAGAGTCCTTCGTCCTGAAGACTTTGGTTATCGTTGTGC	scaffold35157:21185	22624
SLG-1	DAFWA4650	0	83	AATTCAAGTAAGAGCCAAGGGAGATATCCTGATATGAAAGGTAGAAAGAACTATGCCAATAATTCTGAACAACCAGAACAGT[T/C]GACTAGGAG	scaffold49752:6617	11095
SLG-1	DAFWA3219	0	27	AATTCAAAGAAGCAAAGAAAAGAGAT[T/C]GCAAGGCAATCTTCTTAATCCATCAATATGTGGATCATGTGAATTTTGAGAGAATATCTGCAACA	scaffold14479:6460	18156
SLG-1	DAFWA4346	0	18	AATTCTTCCCAACAAAT[A/C]TAAATTCAAAGTGTGCACCAAAATTGCTTGACATTCAGTCCCTTCCATTCGAGAGAAAGCATCAGCCACCACAT	scaffold48848:9486	15063
SLG-1	DAFWA8482	0	47	AATTCACTGAAAGGGAGGAGGAGGAATTTCTAAAGATCATGAGACA[G/T]AGTGAGTATGATATGGTGGAACAGTTGGGAAAACTCCTTCTAAGA	scaffold64536:6569	13200
SLG-1	DAFWA2850	0.523	81	AATTCGGCCGAACTAAGGCCTCAAGAACTATGTATTGATTAGATTGGTCAGTGAAGTTCCTCCCCATTGTCAACTTGTCA[C/T]GAGAAGAAGCG	scaffold3103:1202	31604
SLG-1	DAFWA5015	0.014	61	AATTCTTCTGTTTCTATTTGCTTGTTTGGTTTTATTATTGGTGAATCTTCTGTTTCTGCT[G/T]TAAGTTTTAACTATATAATTTGGAAAACTCT	scaffold48848:6562	15063
SLG-1	DAFWA3668	1.083	44	AATTCCATAAAACAACCATAACACAATTATTAATAAACAAAGT[G/A]TCATCTTATAACACTTGTCATCTTTATGTTTGTAAGATGGTTTGTAGA	scaffold48848:7735	15063
SLG-1	iDAFWA277	0.849	16	AATTCTATACTAGATTTCATATTTTGGAAACATCAAATGACGTTACCATTTTTCACATTCATGAAAAATACATTTCTCTATAAAAGTAACTA-AATTCTATACTAGATTCATATTTTGGAAACATCAAATGACGTTACCATTTTTCACATTCATGAAAAATACATTTCTCTATAAAAGTAACTAA	C28444560:86-T-i1	540
SLG-1	DAFWA2736	0	79	AATTCACTTACTTAATCAAATAAAAAGAAAACACACCAAGGAAGAGGAATTTCGCTTTCAACAAATTGGCACTATTGC[C/T]GGAACAGTTTGTT	scaffold17918:1634	17824
SLG-1	DAFWA4887	0	75	AATTCTAAAGGAAAATCTAAGAATATTCCAGAGAATATGCAATGAATCAAACCTACATAGACAAAGAAGATAAA[A/C]ACATGTTAATTGTGAAA	C28701194:3155	3386
SLG-1	DAFWA312	0	21	AATTCTTATAGAGATGGTCA[A/G]ATGTATGAGACTGAATGTTGGACTTTCTAAAGGATTTTGGACAAAGGCACTTAGTATGACATGCTATGTCA	scaffold2765:5131	12544
SLG-1	DAFWA8653	0	9	AATTCATC[G/A]TAGGATAAGGCCGATGTAATGATGTTCTTGGCACGAAGGTTGAACTGGACCTTCTTGCACTCCTCATCGGTCCATAGACTTTT
SLG-1	DAFWA2894	0	73	AATTCCCAAAGCCCCTACCTTGGTTTGACCACACTAATCGCCTAGGAAAACCTTTCCTATGATCTAGCCCCA[G/A]CCAAGAGTATGTTCTAAAC	scaffold11391:7195	19823
SLG-1	DAFWA3634	0	42	AATTCCTCAAGGACTACGACTTTGACCTTCAGTACCACCCT[A/G]GGAAAGCTAATGTGGTGGTTGATGCCTTGAGTAGGAAGTTTTTGCACATG	scaffold527:23748	44592
SLG-1	DAFWA8667	0	20	AATTCAGTTTTTCAGGTAT[C/T]TGTTAAAATTGATTTCACGTTAATCGATTAACTCATTACTTAATGATTAACTGGCATATTTTTCAGCTAAGT	scaffold11697:681	4592
SLG-1	DAFWA2784	0	43	AATTCTGTGATGATCTTGGAATCAATCACAATTTTTCTTCTC[C/T]TAGAACACCACAATAAAATGGTGTTGTAGAGAGATAGAACCGATCTTTA	scaffold11339:3275	11082
SLG-1	DAFWA5113	0	20	AATTCGCCACTCACATCCA[G/A]CACCAAAATGTGTACATTTTCCAACATATCTATCTGGTCTAGACTCATCAACAACATAATCAAATGAATTTT	scaffold30481:7797	12691
SLG-1	DAFWA1064	0	78	AATTCAGTTGCTACCCGAATTTTCATATATGAACTTGAATGAGGATACTGAATAACCATTAAGTAATAACTACACAA[A/G]CTTCTAACAATGAA	scaffold7315:10601	12606
SLG-1	DAFWA437	0	46	AATTCTATATAATAAAACAAAAATATAAAATGAATTAAAGATTCT[T/A]CTTTCGTATGCGACGTCCCGACTTCGATATTTTCCCGAGTTTATCT	C28701194:216	3386
SLG-1	iDAFWA803	0.421	57	AATTCTTACCTGTGGAGATGGCAAGGATAAGAAGCAAAGGGAGAAGAAGAAGAAGAAAATATATTGTAGATTGATTTTGCTTCACCATTGTT-AATTCTTACCTGTGGAGATAGCAAGGATAAGAAGCAAAGGGAGAAGAAGAAGAAGAAGAAAAGATATTGTAGATTGATTTTGCTTCACCATT	scaffold76460:4820-GAA-d3	5584
SLG-1	DAFWA4952	0.292	45	AATTCCTATGTTGTGGTAAATTTTCGTGATTTTCTGTGATGAAA[C/T]GTTTTTGGACTGTTGCGGGTCCAAATTCGCCCGAATTCGGCCCAAAA	scaffold131:7401	33762
SLG-1	DAFWA4156	0	24	AATTCCTAAATGAGATAATTCCG[A/G]CCTTCAAGTGTTTTTGAGAGGATTTTATGAAGAAATGGTGTATTGCAATCTGTTTTGCTCGAAGGATT	scaffold37529:820	1686
SLG-1	DAFWA3817	0	82	AATTCAGCCCCCCACCCCCGTTAAGGTCATGTATATATAGGTGTTATGGATGAGTTAGTGGAGGAAGATATTTTGGGTTGG[G/T]TGTCATTAAG
SLG-1	DAFWA1755	0	22	AATTCCACCATCATCGAAAAG[A/G]TTGTGTCATCATTACACTTTTTGTGTTTAAAACATAGAAAACTCTCTTTATGGGTTTTTTTATAAAATAT	scaffold37274:268	1711
SLG-1	DAFWA7969	0	11	AATTCCTTAG[T/C]AGACATAGACTGGCGATCTTCTTTATCTGAACATTCTCCCGGGATTTCTAAAAATTCTATGGTTTTATGCCTACAATTCAA
SLG-1	DAFWA3119	0	53	AATTCGGGAGATATTATTGAGAGAGTTTTTAGATTATAAGAAGATATTACTG[T/C]AATTGTTGGGAGTGTTTTCTCTATTATGCATATCGATAC	scaffold83710:1445	5109
SLG-1	DAFWA3181	0	84	AATTCAATTATAAGGTTAAAAAGGAAAAATATGAAACCTGAAGGCTTTTCCAAATGAATTGATATCCAGGATATGGAAACCAT[A/C]TTGTGAGT	scaffold98567:4115	7114
SLG-1	DAFWA5663	0	63	AATTCAACTAAACTCTTCAATGAGGTTGGCGAGTTTAGATTTCAATAAAATATAATTTCCTC[T/C]AAAATCTCCAAAATAGTTGCTAACTTTGG	scaffold131:15034	33762
SLG-1	DAFWA7561	0	15	AATTCAATAAAACA[A/G]CATCTTGAGTCTTGTAAATTGAATTGGTGTATATGATTATACTATTGTTCAATATAGTGAAGAAGAAAATCTCCGAA	scaffold22429:5275	28018
SLG-1	DAFWA4699	0	38	AATTCCAAAAAGTGGCAATAAAGAAGATATACCATAA[G/A]TTCCTACATTCCAGTTACACATCATCATAAACAGCAAAAGCATTCACGAGATTA	scaffold46114:1773	3918
SLG-1	DAFWA6855	0	71	AATTCTCTCTTTTCTAATCTCACAAATGCAAAGACATATAGATGCATCAATTAACAAGAAATATGCTCTA[C/A]CTCTCTTAAAATCTAACATGC
SLG-1	DAFWA5792	0	66	AATTCTAACATTGAACTTGAATCCAGTATGTAGAGATTACCTGGGTATTTACTAGTGAACCTGAA[T/G]GAGGGTATTGAATAATCCTTAAGTAA	scaffold7315:10432	12606
SLG-1	DAFWA6739	0	47	AATTCAACTTATCTTCACTAGGAAGAACTGGATCAATCTATTTTCT[T/C]CCGAATTTTGAACTCCTTATCTGAAAGTTTCAAATTGATGTGGTT	scaffold99283:5148	7808
SLG-1	DAFWA5839	0	41	AATTCCTATCTTCTGGTAAATGTTCGTAACTTTCTGTGAC[G/A]AAAGTTTTTGGACTGCGGTCAGGTCCAAATTCGCTCGAATTCGGCCCAAAA	scaffold1200:8958	17516
SLG-1	DAFWA6461	0	38	AATTCTTGATGAACAATATATTGTTTAAATATTGTTT[A/T]GTTGTTTGCATAAATTGTCTTGCCTCTATATGCCTATGTGTTTCATGTTGGAAT
SLG-1	DAFWA6734	0	24	AATTCAAACTTTGAGTTCATGAT[C/G]AGTTGTCGACTCCACCATGAACATCAATAATCCTTATTATCACTACTTCCTAACCTTTACATCCTACT	scaffold23420:6693	14268
SLG-1	DAFWA5879	0	60	AATTCACGCGGTTGATGAGTCTATCATCGTCATTGCAAAATCGATGAGGGATTTCTGTT[C/T]CCAAAATGAAGCGATTCGCACGGTTGGAGGTT	scaffold99283:5046	7808
SLG-1	DAFWA1301	0	20	AATTCCAAACAGCTGACAT[A/G]TTGACTAAACGTCTTCCAAACAATCAATTTCTTACTTTAAGGAATCAACTCAGAGTTCAAGATTTTGGCACA	scaffold20366:11859	23156
SLG-1	DAFWA6957	0	76	AATTCTAGGATAGAAATTCTCTGTTTTTGCACATCAATTAACTCATACTTATTCATGCTTACTTGTGAGTCTTGT[G/A]TAGGGTTTTTAGCTAA
SLG-1	DAFWA7510	0	78	AATTCAATAGGAGAAAAGGAGAAGGCAAATGAGATACAAAAATCAATTTTGTATTCTCATTTGGAACTCAAAAGCAT[C/G]AAATCCTTGGATGG
SLG-1	DAFWA1067	0.4	30	AATTCGGTACCCGCCAGTCAGGAGTGATG[T/G]CGCCGTTCCATTCCACGGTCGGAGGACGTGGTCAGATTGTTTGGGTGCTCCGTCATCCAGTA	#N/A	#N/A
SLG-1	DAFWA3981	0.328	38	AATTCAACGGTTTAATTGGTTAAAATCTATAGAATTA[T/C]TAGATGGTGCTAGCCAATTCTTACACATGTATCAACAGATCCTGTCAATGTGAC	scaffold29178:8459	26137
SLG-1	DAFWA2386	0	35	AATTCTGCCATATCCTAGAATTTCACAATAGTTC[G/C]AAAGGAATCTGGACAGCAAGCTATTGGATATATGTTAAAAAGTTCGTTTAACCCTCT	scaffold471:9612	21252
SLG-1	DAFWA7202	0.414	88	AATTCAATCTTCTTGCACCCAATCTCTACTCTTTTTTGCTTTAATCCATCCAAACTGCACAACATGGCTAAAAACACCCGTCAACCC[G/A]AACA	#N/A	#N/A
SLG-1	DAFWA7845	0.3	11	AATTCACAAG[G/T]ACTATGCTTGACTATAAGAGTTTTGTTTTGAATTTTATCCCTAACAAGAGATCTAATTCTATGTGTTTAGTTCTATTATGT	scaffold20366:11833	23156
SLG-1	DAFWA4084	0	50	AATTCACCCCCTCTTAGTTGTCATCTCAGTCTTACAATTGGCACCAGAG[T/C]TTTTTCTGAGTAATTTATTCTCAAAACTGATCATGTTTCTAA	scaffold8353:8636	18367
SLG-1	DAFWA3198	2.979	35	AATTCACCACCCACATCCGACACCATAATGTGTA[C/T]ATTTGCCAACATATCTATTTGGTCTAGACTCATCAACAACATAATCAAATGAATTTT	scaffold48149:491	3768
SLG-1	iDAFWA51	0	47	AATTCCTTAATTATAAGGTAGGAGATAATTTGATAGTATAAAAAAAAGAAGTATAATGTTGAAAGGAATATTTTTATAATTTCATTTAATCT-AATTCCTTAATTATAAGGTAGGAGATAATTTGATAGTATAAAAAAAAAGAAGTATAATGTTGAAAGGAATATTTTTATAATTTCATTTAATC	scaffold54301:7544-A-d1	7972
SLG-1	iDAFWA43	2.98	75	AATTCCGCCAAGTAGGATTTGAACTTATAACTACTCAATTAACAATCGATCGCTCTATGATAGAGCTACTGAAAACAACGGAAATTCGAGCT-AATTCCGCCAAGTAGGATTTGAACTTATAACTACTCAATTAACAATCGATCGCTCTATGATAGAGCTACTGAAAAACAACGGAAATTCGAGC	scaffold26993:7009-A-d1	13120
SLG-1	DAFWA3728	0	54	AATTCGGCTAAGAGAAAACAAATTCAAAGCATCAACAATATCAAGTGCCAACC[G/A]AGTAGATAGATTGAAGATTAGATTAGAAATTAGATAAA	scaffold2142:19721	23199
SLG-1	iDAFWA208	0	15	AATTCAAATTTAGAATAAAAGAAGAAGTAGAAATACATAACCAACATTCAAATAAAATTGTTAGGAGCATGAGTCATCCATCCAAGGATTGG-AATTCAAATTTAGAAAGAAGAAGTAGAAATACATAACCAACATTCAAATAAAATTGTTAGGAGCATGAGTCATCCATCCAAGGATTGGATGC	scaffold201:104-TAAA-i4	3347
SLG-1	iDAFWA377	1.453	65	AATTCAAGTCAAAGAAATCATACATCGTTTGGGATGTACCCGAGGAAGAAACAACATTAAGCACCCAGATGAAGAGGAGACCGCGAAGCTGT-AATTCAAGTCAAAGAAATCATACATCGTTTGGGATGTACCCGAGGAAGAAACAACATTAAGCACCTCAGATGAAGAGGAGACCGCGAAGCTG	#N/A	#N/A
SLG-1	DAFWA404	0	53	AATTCCCAAGATTTCAATGTTTAATCGATTAAAATAACTCTTAATCGATTAA[A/T]GGTTCTTCTAAAAGATATTTCAATGTAATATGAACCTCC	scaffold23669:8994	18075
SLG-1	DAFWA2560	0	39	AATTCTTTTAATACAATAAGTTAATATTATACAAAATT[G/T]AAAATAATTAGACATTTAAAATTAATTATGAATATTTAGTTTAAGAATTATAA	scaffold38165:6319	9510
SLG-1	DAFWA1153	0	27	AATTCAACCTATTTTGCATGCCTTTT[G/T]TTCAACTTACCTTGGCCCTTAAGATATTTAAGGGACTCGTGATCACTATGAATCACGAATTCCTT
SLG-1	DAFWA1328	0	29	AATTCTTCAATCTTTTGAAGCTTGTCTT[C/A]AAGTTCTTCATCCTTTTTCTTCTTTTTGTTGATCTTGATGTCTTCATCACAATCGTACCGAGG	scaffold14406:10496	12210
SLG-1	DAFWA7365	0.718	85	AATTCAAACAAAATAGAATATAAATCGAATTGAATATAAACATATTTCGCAAATTTATAATTTACAATTACGCAAATTTATATC[C/A]ATAATGA	scaffold56427:2843	3045
SLG-1	DAFWA1070	0	62	AATTCTGAGTAGGGGGCTAGTTCTCTTATTCAACTCTAGATTGAGGCTATTTCTAGGGAAG[C/T]TAAAGTCTAGATGGTAAGTCCGTTCAAATT	scaffold4868:11129	40268
SLG-1	DAFWA7292	0	68	AATTCTAGTGATCCATCAATTAGGCCCATAGAGAAGCCCCTTTCAAGCAGTTGTCCCATGCTGATCA[A/G]GTTGCTCTTCATGTTTGGCACATA	scaffold49223:5485	10179
SLG-1	DAFWA1508	0	7	AATTCA[G/A]GAGAAGTGTATGTAATTAGAATATATGAAATATGAGAACCGTGCACTGTTTAAATATTTCATTGTTCTCTCGTTTGAATTAATAA	scaffold16799:1205	12913
SLG-1	DAFWA4378	0	27	AATTCTTATCTATCTTTGAATTTATT[A/G]TTTAATATTCAATTTCCTACAAAATTCAAAGAAAATTTGGACAAGAATTAATAAAGAACCAATTT	scaffold19453:708	14867
SLG-1	DAFWA4775	0	85	AATTCATAATCTTCATATTATAAAGCAAGTAACCTCACCATTATGTCGAGGCTCATCCTTTATAAAGTACCAACACCTCTTCCT[T/A]TAGAAGT	scaffold45107:7566	21318
SLG-1	DAFWA2973	0	61	AATTCATACATTATTAACATTATTTATTAAATTATATCAATTTAAATTCATTAGATCTAA[C/T]GAATCAATTTTAATAAATTATGAATAATTAT	scaffold1534:23820	44802
SLG-1	DAFWA1807	0	24	AATTCTTGGAGTTGGTAGAGTCG[A/G]GGAGTCGCCATCTACTACAATAGAAGGAGTTCTATACGTTGAGGGACTCAAGCACAACTTACTCAATA	scaffold1938:2787	17006
SLG-1	DAFWA526	0	52	AATTCGAAGTTCACTCAGTATTTCACTCATTTCCCAAAATCCAAGTACATC[A/C]AATATCACTCCCACTCAAGTATCTCTCAAACATCCAAATA	scaffold33542:9513	22494
SLG-1	DAFWA7470	0	29	AATTCGTCTCCCTCAAATCGCGAATAAG[C/A]TTCGGCGACACCTCCTCCTGTTTATACCGGTGCGGGTGCCCGTCCCAGCAACCGGTCCAATTA
SLG-1	DAFWA1289	0	85	AATTCTCATTAACATAAAACATAGTACATCCGAGTATTTATACATCCGAGTATTTTTCAGAGTGCTAGGATCGTTGGCGCGTAA[G/A]TTAACTA	scaffold42714:1944	2805
SLG-1	DAFWA4667	0	54	AATTCCAAGAAAGAAGGTCAGCTCATCCATCATTGACATCTCAAACTCCCCCT[A/G]CATCAACTCATAAAACTCCTTACAAAGGATGTCATTAG	scaffold6837:7636	12504
SLG-1	DAFWA2010	0	89	AATTCCCAAATATCCGAGTCATTGGCTTTTATGAATATTTTCATCCGAACTATCTAGTAGGTGTAACCTTTGCCACTGAATATGGGAG[C/T]GTG	scaffold119:15031	64401
SLG-1	DAFWA1999	0	79	AATTCTAAAAATGAAAATTATCCATAGGGCATTGAAATCATCGAAGGGAATGTTAGAAATAAAATTTATCCATAGGGC[A/G]TATAGCCATCAAA	scaffold74953:1916	6154
SLG-1	DAFWA986	0	68	AATTCAACCAACAACTTTGTTTTGACAAAATTAAAACTGAAATTGATCAACCAAATGGCCAAACCGT[A/G]TGATTCTTCCATGAGCCAATTCTC	scaffold86743:2181	11830
SLG-1	DAFWA4436	0	33	AATTCTCCAATAAAACTTGGAGGGCGATTGAT[G/A]TTGGAACCTTCTATCAAAAATGATTGAGAGGCCATCTTAGGATCAAGGGAGTATCTTAC	scaffold119:43746	64401
SLG-1	DAFWA2138	0	43	AATTCCCAAAAGATCCATTGAGCTCAAATTAAGTCACTGGAC[T/C]ATTTGATTATTATAATAGTTAAGAATGCAACTTACACCTATCCATCCAC	scaffold1010:39749	55844
SLG-1	DAFWA3033	0	33	AATTCTTGATGAAGCTTACCTGTCTTAACATG[T/C]TTATATGATTATATGTTTGCTTCATTAATATTATGTCATGCCTACCTGATCTTAAATAT
SLG-1	DAFWA4053	0	42	AATTCCCTAACTAGAGCAGGGTAGACTTGTCCCTTTAATTC[C/T]AGATACTGAACGGCTCCCTGAGCCTCCATATCGTGCGGGAAACTAAAGTT
SLG-1	DAFWA5929	0	40	AATTCAAGCACACAGGAAGATAACCATGAGGTATACTCT[G/A]ACACCTCATCCATCTCTGATGACTCACCTCCTTATGATGTTTTATATGAGGC	scaffold62283:531	586
SLG-1	DAFWA1157	0	47	AATTCTCCTTGAAGCCTAAACTAAGCTTAGATAGAAAGTCTACCAT[T/C]ATATTTCTGTCTCTGAAGATGTGTTGGAATCGAACATCCCAATTT	scaffold13750:8671	15271
SLG-1	DAFWA6553	0	75	AATTCTTTCAAGTTTGTAGTGTCAAAGTGCCAAATAAATGTGGGACACTTTATAAGTGACTAACGAAGGCACTA[G/A]CGAAGTCAAGCGTGCCA	scaffold119:13138	64401
SLG-1	DAFWA8317	0	67	AATTCATCATATGATAGGTCCAATGTGATGATGTTTTTGGCGCGCAAGTTATGCTGGACCTTCTTG[T/C]GCTCATCATCGGTCCATAAACTTTT
SLG-1	DAFWA3832	0	28	AATTCCACTATTTATAGTGAAGAGGTG[T/C]ATGAAATATTCCCTGGTAGATGTAATTGGCTTGGTCAACCATCTGATATTGCCAGGCTTGTTTC	scaffold83069:3898	6766
SLG-1	DAFWA6523	0	53	AATTCCATGGTACCCCATCAACTAGACATTTTGGCTGGAAGGCATCATTAGC[C/A]CGCATTTCCTCTTGGATGAAAGACATGCATTAATCAGAA	scaffold19752:21277	49182
SLG-1	DAFWA7937	0	20	AATTCGATAACAGAGATCT[C/G]GGCTATTTTATCCTGGGGACGGCGTGGTTGGTAGTCTGCTTGCACATTTTGGGCAGTGCCACAAAACGTCTT
SLG-1	DAFWA1922	0	45	AATTCTCGTACTTACAAAGAAAGAACAAAAAGATGGCATGACAA[A/G]CACATACTCGGCAGAGAATTCCGAGTAGGGGAACTAGTTCTCTAATT	scaffold11512:4685	25245
SLG-1	DAFWA7060	0	52	AATTCAATGGTTTCAATAAATAATCCTATTGTCGATTATTTTATCCGAACA[A/G]ATAGGAATATTTATTGGGCCGAGCATTTCTTACTTCAAAT	scaffold38877:71	17268
SLG-1	DAFWA3480	0	73	AATTCATTATTGAAAGAATGATTGTACAAAATCACAATGAATCATTTAATAAAAGGAAGGAAAAACTAACTA[C/T]TCTTACCAAACTAATTAGT	scaffold52139:1452	4363
SLG-1	DAFWA7267	0	53	AATTCTAGGGGAAACTCTGGAATGCGCCGCTGTAAATGATTAACACAACATC[A/G]CTTTTTAGAGACTGAATTGTTGTATATTATTAATACAAC	scaffold11686:10547	13900
SLG-1	DAFWA4878	0	24	AATTCTCGAGGGATTCTGAAATT[G/C]ACATTGGATTACTACGAAGTGATTGGATAGAAAGATCCAAGTAAAGGATTTCATTGACAACCACACCA	scaffold89160:4400	8830
SLG-1	DAFWA3385	0	19	AATTCTCTAAGATACAAT[T/C]TGTGCAAACTAGTATACTATTCCTATCATTTGCCAACAAAACTAAGTAAAAACATTGACCATTGTTCTCTAAT	scaffold2680:37342	53809
SLG-1	DAFWA5196	0	67	AATTCCCTTCATAAGACAACTTGGGATCCACCTGAGTTGTCATTCCTGCCTATCTCTGTACATACT[A/C]CTTGAATGTCTCATTACTTCTCTTG	scaffold2680:44810	53809
SLG-1	DAFWA8511	0	54	AATTCTGTCATTAAGATTTAGAAAAATGATATTATAGGGCTGTGAAGGAGTGG[G/T]AGATGTTGATTAGTGTCTATAAGAATTATTGTATACTT	scaffold19752:38092	49182
SLG-1	DAFWA3766	0	73	AATTCCCAAAACCCCTACCTTGGTTTGATCTTACCAATCGCCTAGGAAAACCTTTCCTACGATCCAGCCCCA[G/T]CCAAGAGTATGTTCTAAAC
SLG-1	DAFWA8846	0	13	AATTCAATCAAT[A/G]TTCAACGTAATGTATATGATTTGATCTATGTAATATATGTTTATGTAAAAGTGTAATTAATGTTCAATATATAAATTCA
SLG-1	DAFWA98	0	41	AATTCTTAGAGCGATTCCATTATGTGGTTAAACAAAAAAA[T/G]GGAAAAGCTAATATGGTGGTTGATGCCTTATCAAGAAGGCATTCTTTGATT
SLG-1	DAFWA6291	0	22	AATTCAACAAACATTAATAGC[T/C]ATGTCTCAGAAGAATCAAAAGAAGATGATCATCTCACCCACAAACAACTCAGAATCCTTACCTAAAGAAA	scaffold85977:12948	17834
SLG-1	DAFWA4077	0	21	AATTCCTTTTGGGACCTTCG[C/T]TTTCTCTCTGATTGGGAGAGATGAAAACTATTTGTGATTTGATGTTTTGAGGACCATAACTGTTCTTTATG	scaffold1534:39471	44802
SLG-1	DAFWA5991	0	48	AATTCACCTTGGGTTACTACGAAGCGATTGGATGGAAAGATCCAAGT[A/C]AAAGATTTGATTGATAATTGTACCACGAAAGTAGGTGCGACTTC	scaffold4868:8807	40268
SLG-1	DAFWA1241	0	21	AATTCACAACCACTTCATTC[T/C]ATAACCATCATCAAGCTCTTCATCAAACAAGATCTGATGTGGAGTTTGTCATCATCAAAAAAGGGGAGATT	scaffold765:17259	29249
SLG-1	DAFWA3734	0	72	AATTCACATAGGAATTATGTTGTTGATACTCCAAAAGAGGAATTTAGATTCATGAATCGTGTTATTTCTTT[A/T]TGCACATAGATACTTCACCT	scaffold98775:3503	5419
SLG-1	DAFWA1643	0	26	AATTCCTACAACAGGATAATTGAAT[T/C]ATCGATTTTATTATTTCAAGTCATTTCTGGTATTCCTTAAGCAAATCATGATAAAATTTGATAAAA	scaffold84029:925	8336
SLG-1	DAFWA6290	0	42	AATTCCTTAGAAATGTAACAACACTAGTGCTATATACATCA[T/C]AAAGAATCCATTAATGCATTCAAGAACTAGACACATTGATATAAGACACC	scaffold31197:8495	15997
SLG-1	DAFWA7448	0	82	AATTCACGACGATCACTATTCAGAAATCTTAAATCTCAACTGAAACTTACCCTCTCGTTAATATATGACTTTTTTTTTTTA[A/C]TTTAATGATA	scaffold6428:21843	23668
SLG-1	DAFWA3467	0	87	AATTCTAGCCCATGTGGCATAACATTCATAATTTTCATATTTTCATATCTTGTATATTTAGAAGATCTTTAGCATACATTTTCATA[C/T]AGAGT	scaffold18434:8361	15595
SLG-1	DAFWA6554	0	59	AATTCAATTATATTGATTACTTGATCAAGTATTACCATTGCTATTTATAGTAAGCTAC[A/G]AACTAACCAACTTAACAGATTTTTGAAATATTA	scaffold49223:3958	10179
SLG-1	DAFWA4873	0	10	AATTCAAAA[T/C]CTATTTTCAAAAGAATTGAATAAGCCTTGAAACAAAGTAAGAAATGCTAAGTAATGAGTTACTTGACCTGAGTAATAGGTTT	scaffold46490:443	12339
SLG-1	DAFWA4313	0	72	AATTCCAAATATCATTGGAAGTTTCTATTTAAAGAATGGTTTCTAGGGTAAAACGATCAAGGACTTGAAAC[A/T]AGAAATTTTTTACTCTGAAG	scaffold4102:17637	18760
SLG-1	DAFWA6370	0	60	AATTCCTTTCCCGCCAGGTCTTCCAACTTGTAGGCGCCCTTGCTGGTCTTATTTGTCAC[C/G]GATAAGGCCCTTCCTAGTTGGGTGCCAGATTC	scaffold19004:4801	17031
SLG-1	DAFWA3063	0	51	AATTCAAGACTTGTCTAATTTTTTTTAAATATGATTTACATGATTTAAAA[A/T]TGGCTTAAGCATGATCAAAAAATTACATAATGCTTTAAACA
SLG-1	DAFWA5377	0	9	AATTCATA[T/C]TATGCTTTCACTCAGAGAATAAGCAAGATGATATGAAATTTCTAAACTCAGATTTTCGTTTTTCTTTCTCCTTATGATTATTA	scaffold20292:8730	10731
SLG-1	DAFWA2774	0	16	AATTCCTTTGTGAGT[G/C]TTGTGGCTGAACCAAGATTAGAAGTTCTTATCAAGAACCAAGTTCTTGTGGCGAGCATCACTTTGGCTTATCAACA
SLG-1	DAFWA904	0	6	AATTC[C/T]ATATTGTATATGTATAAAAGAAAAACATGACTTAACCCACATATACCTTTTACATATACTTCAGCAAATTGCAAAATTGTAAAGTG	scaffold82227:19	10338
SLG-1	DAFWA5858	0	11	AATTCAATTG[C/T]CGTCCATCATTAAGCCTTCACAAAGAATTAAGCTACCGCCCACATTCATTCCAAGTGATTCGTGCAATGAACATGGAATCA	scaffold77611:1162	3814
SLG-1	DAFWA3868	0	25	AATTCAAAAAGTAGCGTTCAAGGT[T/C]TTGTAATTGGAAGTGTGTATGTAATATACATTGACTTCAATTTTAATGAAGAAAATCTCCCAAGATC
SLG-1	DAFWA7956	0	47	AATTCAAGTGTGTATTGATAGTGATTAGTAACGTTCAATCTCAACA[T/C]ATTTATTCGAAATAAATTAATCATTTAGTTAGTGATTAGTCAATC	scaffold31879:8663	13036
SLG-1	DAFWA5470	0	56	AATTCCTCATACTCCTTAATTTCAAAAGTATGCATATATTGTAAAGAAAGTCAGC[G/C]ACACCACAAGTTACAAAAAGAAAATGAATTTGAAGG	scaffold22186:8269	16803
SLG-1	DAFWA7357	0	45	AATTCATTTTAACCACCAACAAAGTTAAGCGCGCGAGACTAATG[A/C]ACTGACACACAAATATGAGGTGTTTTGAATGCTTCATAATGAATCTA	scaffold20292:8249	10731
SLG-1	DAFWA1496	0	42	AATTCCTTGAATAGCATTCAATGTGGTCAAGATGGCTTGGA[C/A]AAATTTCGTGCAAGCATTCATCAAGCTTGAAGGTGTCATCCAACTTAACT	scaffold77611:968	3814
SLG-1	DAFWA5756	0	73	AATTCATGGCTATGGCACATGAGGTATGTACATCTAAACTTTAGAGACTTGAGTAGATTGAACTCACAAAAC[A/C]TGGTTGTAGGGTTACCTCT	scaffold49223:5740	10179
SLG-1	DAFWA2487	0	57	AATTCAAATCTAAGAAATCCTACATCGTATGGGATGTACCTGAGGAGGGAACGATA[T/A]CAAGCACCTCTAGTGAGGAGGAGTCAGTAAAGCTA	scaffold72413:72	951
SLG-1	DAFWA8043	0	49	AATTCAAGTATCCCAAGAAATCAATCAAACCAAGAGGCGAGTCACAAA[A/C]ACAAGATATACTCTCTAAAGTGTTTACACTCATGTGTCTTAGG
SLG-1	DAFWA5988	0	55	AATTCTTTTTTTTCTAGAGGCGACACAAGAATGTTTTTGGCTTTAAGGTCGTAC[T/C]GCACTTTCTTCTTGTCTTCATCATTCCATAAAGATTT	C27816599:86	187
SLG-1	DAFWA1923	0	49	AATTCACTCTATGCTTTCATTCAGAGAATAAGTAAGATGATATGAAAT[G/T]TCTAACTCAGATTCTTGTTTTTTGTTTTCTTATGATTGATTTT	scaffold4425:13173	25359
SLG-1	DAFWA3371	0	64	AATTCTATACATACAATATAAATAGGGTGTGGGAGAGCTTATTTTGGCTTTAAGGGCAACTTT[T/C]GATAATATGTTTATGAAAATAGCTTATA	scaffold87047:3240	8811
SLG-1	DAFWA866	0	56	AATTCCAACGATTTCGTGAGTTAGCTTGGTGTGGTCGGTGTTGTTGACCATAAAA[T/G]TCCATTTGGGGAGTGAATGATGTTGGTATTTAAGAA	scaffold2569:15286	25811
SLG-1	DAFWA5211	0	15	AATTCAAATTCATC[A/C]ATTATATCCGATGAATATCTATGGATATATTCTACATCCATGTGGATGGATATCCAATCAATCCAAAAAACAAAAAT	scaffold19752:5037	49182
SLG-1	DAFWA6972	0	82	AATTCAAAGGTTGATAGAAAAGGAAATTAAATGTCAACGATTAAGCCTTTGATTAGTTCACTCTGGAACCCAAGTGAGCAC[T/G]TCCCAAACTC	scaffold4102:6946	18760
SLG-1	DAFWA8454	0	54	AATTCTTTAGAGTATCAAACTGCAAATCTGCTAAAGAAGTGTGGGATACTCTT[G/T]AGACTACACACGAAGGAACTGAGGAAGTCAAAAGGTCG
SLG-1	DAFWA2494	0	19	AATTCTAGACTCGACTAT[T/C]GTTCCTATGTTTGGTCTATTACCGTAATGTAAACTCGGGGTTTTAAAGTCTATGGCAATCTCTTTGCCTTTGA	scaffold119:46761	64401
SLG-1	DAFWA5094	0	70	AATTCTTTTTTATTGCATGAATGAATGAATGTGTGAATAATGTATTCTTTTTAATGAATATATGAAGGC[A/T]TAAGCCAACGAGTGTTTAAATA	scaffold45289:5282	6818
SLG-1	DAFWA6556	0	22	AATTCACAAATTCTTGAGGAG[G/A]CAAGATCAATTTGAATAAGGAAAATATTTCTCAACTTCTTATGAGTTGGAACTACTTAGACAAGTTCTTG
SLG-1	DAFWA3693	0	20	AATTCTCTCTTTTTGTAAT[A/G]ATACTAAATCGCCTTTTCAGATTTTCGACTTAGTACCGCTCTTCTTTTTTTAGGTCGCCCTTGCAGGTAATC	scaffold24373:4262	6837
SLG-1	DAFWA6116	0	37	AATTCAGTAGCTAATTAAACTCATGCATTAAGAACA[A/G]GATAAACTTCCCAAAATCAAATAACAATTACATTCGAATTGAATCTAGGAGTATA	scaffold4425:14680	25359
SLG-1	DAFWA3654	0	62	AATTCCTAATTGTATTATGCTTCTTTTACTATGTCATATACCTCGTAAGTTAGTGTCTTAA[T/G]TATAGTATCTTTGCATCCCCTAGAAATCTC	scaffold20292:3627	10731
SLG-1	DAFWA1665	0	88	AATTCAAATCCTGTAAATAATCTCTCTACTTTAGGAGATAAGGGTACCTATATTTATTTTTCTTATACAGAGTCTCAAACATTACTA[C/G]GCTG	scaffold45107:7398	21318
SLG-1	DAFWA8373	0	56	AATTCAACTTTTCATTCTAGGTCCAAACACATTGATGTGAGGTATCATCAGATAC[G/A]TGGTGCTTTGGATGCTAGGTTGTTAGAATTGGCTAA	scaffold4425:10829	25359
SLG-1	DAFWA7679	0	42	AATTCAAAAGTTTTGGTATACTAAGCAGTTTTAAAATTTGC[G/T]TTTTCATACCATGGATTTTGATGATTTAAAAGAGAGTATCTGATACTGTT	scaffold1010:42688	55844
SLG-1	DAFWA6531	0	81	AATTCTATGATCAGAAGAAGAAGTTGGTAATGAGAGCATCAATGGCTCCAAACAGAACATTTCAGATAAGCTTAGCAACT[G/A]TTGAATCTCAA	scaffold49223:5629	10179
SLG-1	DAFWA6773	0	75	AATTCATTGGATGATATTCATGGATATCTTGCTTTTATTCTTTTACTTTTGTGTGTTTGAATTTGTCCATTTCA[T/A]TGCATTTCCTAGATTTC
SLG-1	DAFWA1851	0	84	AATTCTTGCCAAATTAGCAAGCAAGATGAATCTAGTGAGGTAAGCTCTTGAAATTCTAGTTCTAACTCCGATGATTCCCCCAC[A/G]TATGATAT	scaffold1938:13804	17006
SLG-1	DAFWA949	0	61	AATTCAAACCATTAAGATGCACCCAAAATAATCAATTGAAATTTCCAATTTAATAAACTA[C/T]GGTTTGTATTAAATTGAGGAAAATATCCTTC	scaffold19410:3775	24226
SLG-1	DAFWA1455	0	36	AATTCTTATTGCACTGAAAGAATCAATCTCGAATA[C/T]AATCACAATATAACTATCACTGTCAATTCTTGAAATACCCACAATATGACTACTTA	scaffold38889:30773	32582
SLG-1	DAFWA4774	0	47	AATTCTTAGCCTAAAAGAAGAATAAACCTCACCCTCTACCCACATT[G/T]CACTTTATTTCATCCCATTTCTCTCAAATTTGTCAAGGAAACCCA	scaffold31973:10414	15983
SLG-1	DAFWA8295	0	7	AATTCC[C/T]TTTGTAGACCTTGCAATTTCGAGGAACCATGATTTGGTAGCAGCTAAAGCCAATATGATTCTGATGGTAGTAATCTTGACAACGG	scaffold16498:3069	5839
SLG-1	DAFWA6850	0	84	AATTCTCTCATTTTATTATGATCTTGGTCGTGTTTTTAGGTTTTTGACTTAAAATCACTCTCCTTTTCCTAGGTTTCATATGT[G/C]AGTTTTCA	scaffold76013:4492	9864
SLG-1	DAFWA6096	0	73	AATTCAAGTATTGGAAGTTGCTGGAGAAAATAAAATCCATCTTTTGAAGAAGACCCACGTTTCAAAATCACA[A/C]GGAATGATTAATCAAAATT	scaffold56392:850	1335
SLG-1	DAFWA7605	0	49	AATTCAATAAACGCCCCATGACTCCAAAGTGGAGGATTCAATATTCAT[G/C]CCACGATTCCAAAAATGGAGGAAGTTGGCACACATATCAGTTA	scaffold95832:5177	5776
SLG-1	DAFWA7597	0	80	AATTCATTTTAAACTCTTGTGAGAATTTACACGCAAGGTTTACCTAACTTATACTCAAAACTAGGCAACCATCTTAGGA[C/T]TTCTAGACTATT	scaffold119:36338	64401
SLG-1	DAFWA6384	0	44	AATTCTCTATCTAAAGGACTTCAACCACGTGTTGTTGGTTGTC[A/G]ACACTCATGGCAACTCTGGGAGGAACTTGATTCCTATTGCAATTCTTA	scaffold22186:6933	16803
SLG-1	DAFWA7771	0	8	AATTCTA[A/G]TGACTGCTTTGAAGGGAAGATCAATTGGATTTGCCCACTACAAATGAGATGTCTGGTTGAGTATGAGTGAGGTACAGTAATCTT	scaffold11512:23657	25245
SLG-1	DAFWA1518	0	66	AATTCAATCAAATCAGAAATCAATAATGACTGAAGTGTAAAAGAGATAGGGAAAGAGAAAGTGCT[C/T]AAGGATTTTTATCCTAGTTCGTTTGA	scaffold31197:9155	15997
SLG-1	DAFWA7031	0	46	AATTCCCGAAATTTGTCCAGACTAGGTATTATGGGAAAAAATAGG[A/G]AAAATTAAATGAACACCATTAAGGGGAAGATTTATTACTTCGCATC	scaffold76013:4617	9864
SLG-1	DAFWA5105	0	26	AATTCCAATTTTGATTAATCATTCC[T/G]TGTGATTTTGAAACGTGGGTCTTCTTCAAAAGATGGATTTTATTTTCTCCAGCAACTTCCAATACT	scaffold56392:850	1335
SLG-1	DAFWA5893	0	35	AATTCAAGAAGCTAGCGTTCAAGAACTTGTAATT[A/G]GAAGTATGTATGTAAGATACATTGACTTCAATTTTTAGTGAAGAAAATCTCCCATAT	scaffold2680:47616	53809
SLG-1	DAFWA6484	0	29	AATTCTCAAAACAAACAAGCTAAGTACT[A/G]CATGTTGTGTGCTTTAGCTTGTCAAAAAAAAATGACTTAGGCTTAAAGAAATGTACCTTTCTT	scaffold22431:309	9755
SLG-1	DAFWA4362	0	61	AATTCCTAGAACCTCTACCATGGTTTGACCTTACCCAATCGCCTAGGAAAATCTTTCCTA[C/T]ATCCAGCCCCAACCAAGAGTATGTTCTAAAC
SLG-1	DAFWA3714	0	30	AATTCACACGAAAAAATGGAGAAAGCGAT[C/T]AATAGACAGAAGGTTCTTCTTCACCATCTCAATCCTTCTTCATCCATCCACGCCAACGAATC	scaffold84997:216	6732
SLG-1	DAFWA5699	0	35	AATTCAAAGATCTCACACCGCTAAATGGAAAAAA[C/A]AATTCTTTTGTATTATAGTTTACATTATTATTGTGTAAAGGTGACAAAATTATCCAT	scaffold3227:10820	12548
SLG-1	DAFWA2042	0	74	AATTCACCTTGCATCATCTTAACAAATTCGCTATACAATTCATCATTAGTTGAACCAAAAATAATATCATCCA[A/C]AAATTTGCCCAAGAAAAG	scaffold31197:10877	15997
SLG-1	DAFWA4864	0	16	AATTCCCCACATAGG[A/T]GTCTCCTGACACTCATTCAGTACAAGAGGAATCCTAGCTGACTATCGGGAAATCACCAACTTCCCCTTGTACAATA	scaffold95832:2053	5776
SLG-1	DAFWA7258	0	35	AATTCATATACCTGCTGACAAGAACCACACCATA[A/G]GATATTTCTAATCTGCTATGGCATAAGAACCTCAAACAACCAACCATTTTTCAGAAC	scaffold2770:28391	29798
SLG-1	DAFWA8085	0	75	AATTCATAATTTCCTTGGACTTGCTGACGCTTCATTAAGGACTTCTAAAACATTTCTAGGCCCCTAAGAAATTT[G/T]CTGAACAAGGATTATCC	scaffold6130:8718	17741
SLG-1	DAFWA4651	0	41	AATTCTATCATGTAGAATCCTCCAAGAAATTAATTTGAGC[C/T]TTCAAAGGCACCAAGGAAGACAAAACTGATTGCCGAATCTTACAATCCTTT	scaffold4102:13154	18760
SLG-1	DAFWA2917	0	60	AATTCTTGTGTACTATTTGGTAATTATATTTAGTTGTTTAGATAGAAAAAAATCTTCTG[C/T]CTAGAGGTGTTATGAAAATTATAAATACAATA	scaffold87047:3359	8811
SLG-1	DAFWA5859	0	69	AATTCTTTGTAAGTAAGTTTTATAGGTTTTAGTTTATAATTCAAGAGGAGAAAGGAGAAGGCCAATGA[T/G]ATGCAAAAATCCATTTTGTAATC
SLG-1	DAFWA3139	0	62	AATTCACATTCTTTCTAGGGCTTCAAATAAAGCAGCTAGAAAGTGAGATCTTCATTCATCA[G/A]GCTAAATATTGCAAAGAGCTACTTAAGAAA
SLG-1	DAFWA7069	0	76	AATTCTTGTTGTGGAAATATGATATACACTAAACATTATGTGAATTAGTACTTGGTTAGCATTGTTAATTTGTTT[A/G]AGTCTCTACTTGTCAT	scaffold1010:13833	55844
SLG-1	DAFWA1383	0	80	AATTCAAGTCATTGAGCATGTTTGAATTTTTTTTATTAATAATGACTTGATCTTCATGAAATTTATTTTGGTTAGCAAA[A/C]AATTTTTCCTGA
SLG-1	DAFWA3651	0	17	AATTCTCGAAATACTC[C/A]TAGTATGACTACTTGTGTCAATTCTTTTCCCACAATCTGATTACTAGTGTTAGTTCTTGAAATTCCCACATTTTG	scaffold1010:10775	55844
SLG-1	DAFWA2681	0	57	AATTCCCCCAATTTCATAACCTAGCCCAGAATCACCATAAATCGATTACACCATTC[T/C]AATACTAGAAGATGGTAGATGGTAAGCAGAAAAGA	scaffold18434:10592	15595
SLG-1	DAFWA7246	0	28	AATTCTTTCGAGTTTCACAATGTCAAA[G/T]TGCCAAGGAAATGTGGGACACTTTACAAGTGACTCACGAAGGCACTAGCGAAGTCATGCGTGCC
SLG-1	DAFWA4104	0	49	AATTCTACGGTTATGGCATGACTTGTCCTATCCGTGGATCCCAAAATT[A/G]GATGTTGTTACTTGTTTTATAACACAGGCAACAAAGTCTGGAC	scaffold19752:10354	49182
SLG-1	DAFWA6210	0	78	AATTCAATGCAGTCTAATGCAATTGCACTGTGACTCGATGCAGTCACACCATTATGATTTGGTGTCATAGCAATTGT[A/G]GTGTGATGCGACAA	scaffold46018:7860	19002
SLG-1	DAFWA3326	0	73	AATTCAGGATTTGATTGAGGAAGATCATCATGTCCAAACTCTCTAAAAAATGTATATCAAATGAGTATATCA[G/T]ATAACATGGATTCAGGTCT	scaffold1534:39382	44802
SLG-1	DAFWA4739	0	73	AATTCTATATGATATTATTGCATCATTCATCATTTCATATTTAATCATTTACTCTTCAAAAACTAAAACAAA[C/T]GAATGATGTATGATGTAGT	scaffold19889:2602	23421
SLG-1	DAFWA4545	0	6	AATTC[C/T]TTATGGTTCTACATAACCCTATATTATACTACAATTGAATCTTGAAAGAGATACAAATGTAAAATAGTAAAGTATTATCAAATAAA
SLG-1	DAFWA1235	0	15	AATTCAAATATATT[T/C]ATTATATCCAATAGATGTTACCATTTGAAGATAGATACCCAATTCATCCATTTTTTTTTTAAATGACGGTTTTTCAA	scaffold1534:23749	44802
SLG-1	DAFWA6488	0	43	AATTCCATAATTCTTATGGTGAACATCACTAGACTTATGAAA[C/A]AATTCTTTGTTTATGGCGCCATCCATTCCACATCTTTTCTATATTCCTC	scaffold1938:7713	17006
SLG-1	DAFWA7540	0	6	AATTC[C/T]ATATATATTATTCACATTATTTGCCTCATTCTTTTGATTAACATCTGCATATGCGGTAGCAACAGAAGCATTGTATCTCTTAGTTT	scaffold28770:6030	8955
SLG-1	DAFWA122	0	9	AATTCTCG[A/T]TTCTTCCCAAAGATACTATGCAAACTTTTGTAGGTGCCTTTAATCCCACGGTAGATTGCCTTTTATTGTGAATTTTGCATTTG
SLG-1	DAFWA2198	0	72	AATTCTTCTGATGAAACACCATGTGGATGGATAGGTGTAAGTTGCATTCTTAACTATTATAATAATCAAAT[A/G]GTCCAGTGACTTAATTTGAG	scaffold1010:39749	55844
SLG-1	DAFWA4852	0	35	AATTCTTGATAAGAACTTATTCTTGGTTCAACCA[T/A]GAACATAGGAGAACAAACTCACTAACAATGTATAATTTCCAATAACTTCAAACTTGC	scaffold1938:7640	17006
SLG-1	DAFWA2754	0	62	AATTCCAGAGACCCCCGAGAATCCTAAGACTACTCTCGTGAATTAGGATTCTGGTTTGATA[A/G]CTGAATGACCGGATAATTGGGTTCACCTCT
SLG-1	DAFWA3332	0	34	AATTCCTTACGATCATAGTTCTCCCATTCACAC[A/T]AAAGACCGAAACCAACAGTTCTACCTTGAGTGGGTATTTGACAGCACAATGAATCAAA
SLG-1	DAFWA8559	0	69	AATTCTACGCTAACTTTCAGTACAAGGATGGTGGATATAGAATTATGGTGAAAGGTAAGCTGATATTA[C/G]TAAATGATTTGTTGTTTTTGGTT	scaffold17997:9025	15870
SLG-1	DAFWA2004	0	39	AATTCTCCATTTGCATAAGTGTAGGGCTAACAATATTA[T/C]ATAGCGAAGGAGAGATACTCTAGTTCATGATTCCGCAAGTGTTAGGAGTTATG	scaffold7051:7631	76121
SLG-1	DAFWA5313	0	83	AATTCTTTTAATAACAATTTGAAACCAAAGACAATGTTGGTCGTAGTTAACTCTTCTAATAACAATTTGAAACCAAAGACAA[C/T]GTTGGCTGG	scaffold19004:3685	17031
SLG-1	DAFWA2277	0	69	AATTCCATTGATTTTGGCTTAGGGACATTTCCTTTCATTCTCTTTTCTTACTAGTATAGATACCAGTG[T/C]CTATCAATTGCTCAAGAAGAATA	scaffold16097:9234	19539
SLG-1	DAFWA4745	0	6	AATTC[A/G]AAAAATAATTGGATGGAAAGCCATGTTTTATGTAGCATATGTCCACCGTGTGTCCTGTTTTGTGGCAGTATGAGCACACTTTGGTA	scaffold85977:12925	17834
SLG-1	DAFWA8635	0	60	AATTCAGAATAAAGGCATCCTTGAAGAGTGAACACTTGCATTAATTACTGTCAACATCA[A/T]TAAAGCTGGAGAGAGATTACACTTAATGCATC	scaffold5125:36994	57715
SLG-1	DAFWA1260	0	59	AATTCTTGACTTGTTTACATTTCTGACACATGTCACAGGAATCTTGAGTTTTAAAATC[G/A]AGTTTTGGAAGACCGGTTAGTAAGTTATTTTTT
SLG-1	iDAFWA189	0	57	AATTCATTGTTAATCTGTAGAAATTATTACCTGCATATACACTTATTAGCAGAATATTATTCTCAACAACACATACATTCTCAACAGCACAA-AATTCATTGTTAATCTGTAGAAATTATTACCTGCATATACACTTATTAGCAGAATATATATTCTCAACAACACATACATTCTCAACAGCACA	scaffold11686:10652-A-d1	13900
SLG-1	DAFWA510	0.479	13	AATTCCTTTTGG[T/G]ACCTTCATTTTCTCTATGATGGGGAGAGGTGAAAACTATTTGTGATTTGGTGTCTTGGGGACCATAATTGTTCCTTATG	scaffold82227:661	10338
SLG-1	DAFWA4373	0.235	55	AATTCGCATGTTCTAGGAAAATGGGAAACAAGGTAGATTGTTGGGGCCATATGC[A/C]CGGATATGATGGGATCCTCGTACCTCTACTTGGAAGA	scaffold50314:23231	32764
SLG-1	DAFWA963	0	50	AATTCATCAAGGCATGGATGTGTCATCCTTTTATGTCCAATATATTTTC[C/T]TTGATGCTTGAGAAGACTTTAAAGAAATAAATATCTCATATT	scaffold25277:5957	29940
SLG-1	DAFWA1117	0	23	AATTCTTATAAGACATCACTTA[G/A]TGTTCTCACACCGATTTCAACCCTGTCATATATATCTCATGCAAATGCGAGTTCATATCCTCTCATATA	scaffold45621:6188	8226
SLG-1	DAFWA499	0	34	AATTCATCAACAAAAGACACAAAATACTTATTA[C/A]CTCCCATTGAGACAATATCAATTGGACCACATACATATGAATATATCACATCTAATAC	scaffold2770:25114	29798
SLG-1	DAFWA8835	0	24	AATTCTTAGGTATTTAAAGGGAA[A/C]TTCCCATCATTGCCTTCACTTCCCACCTACCAGGGCTCAATCTCTTCTCGCATATTCTGATGTCGGTT	scaffold7228:17297	33812
SLG-1	DAFWA5463	0	43	AATTCATTTGACAAAGAGCCACATTTAAATTGTGGTTGGGAT[G/A]ACTGTGTGATCACTATGATATGATTTGTGGTTGTTGTAATGTAATTTTT	scaffold2770:10774	29798
SLG-1	DAFWA5861	0	52	AATTCTACAGTCACATTTTTCTTTTGGACATGGTTCCTAAAGAAGTGATGC[C/T]TTATATCTATGTGTTTGGTTCTATAATGCATAAATGGATT	scaffold13628:3934	5319
SLG-1	DAFWA4290	0	85	AATTCGTTGATAATTAGAATAGATTCGTAGACCGGGTGTCAAACTTACTAACAAACTCAACTAAAAGCCCAACAGAATGAACTA[T/C]ATAGGGA	scaffold51635:303	7249
SLG-1	DAFWA2293	0	28	AATTCCGATAAGTTGCCTTCCCAAACT[A/G]TGGTCAATCCGAAGAATGTGAGTGCCATCACTCTAAGGTCAAGCAAACAGATTCAAGTTGATCT	#N/A	#N/A
SLG-1	DAFWA370	0	27	AATTCTTGGTTATGTCTTCAAACCAA[A/G]CGAAAATGAAAAAGAAAAACAACAAAAAGAGAAACAAAAGTGAATAAAAGGTTGAGTAAGGCAAA	#N/A	#N/A
SLG-1	iDAFWA399	0.863	21	AATTCAAGTAACATTTTTTTTACCTTTCTTAATAAACAGATTCCTTTTCCAAAAAGAGATCCACGGTATAGTTAGACATGGAAACTGATTCT-AATTCAAGTAACATTTTTTTTTACCTTTCTTAATAAACAGATTCCTTTTCCAAAAAGAGATCCACGGTATAGTTAGACATGGAAACTGATTC	scaffold11384:1204-T-d1	2132
SLG-1	DAFWA2904	0.573	10	AATTCAAGT[T/A]CATTCTTGCAGGTTAGATTTTAAGAGAGTTAGAGCATATTTTCATGTTAATTGCTGCATCTACATGAAATTGCATTTGTGAG	#N/A	#N/A
SLG-1	iDAFWA318	0.321	59	AATTCTTGGGCAAATGTCTCATATTTTAGTGGACCAGACATTTCCTTCAACAAAAAAAAATAGCATTACAAGTTATGAGTTTGAGCTTATAT-AATTCTTGGGCAAATGTCTCATATTTTAGTGGACCAGACATTTCCTTCAACAAAAAAAATAGCATTACAAGTTATGAGTTTGAGCTTATATA	scaffold60800:6611-A-i1	16996
SLG-1	DAFWA2751	0.392	9	AATTCAAA[C/T]CATTGGATTTTCCTAGAATGAAAGTGAATATGTGAAGTTGGTTTTTTAACTTACTCATAGAGTAAGTAGATCTCCTCTTTTTT	scaffold8483:10788	19083
SLG-1	iDAFWA382	0	38	AATTCTCATAAGCATCCAACCATAGTTCTTCCAACTCTTGTAGTTGGAATTTCCTCTTTTCTCCAACAAATTTCAAATCAAAGTTTAGCAAT-AATTCTCATAAGCATCCAACCATAGTTCTTCCAACTCTCTTGTAGTTGGAATTTCCTCTTTTCTCCAACAAATTTCAAATCAAAGTTTAGCA	scaffold11512:4763-CT-d2	25245
SLG-1	DAFWA2000	0	49	AATTCTTTAGAGTGTCAAAGTACAAATCTACTAAAGAAATGTGAAATA[T/C]TCTAGAAACTACACACGAAGGAACTGAGGAAGTCAAAAGGTCG	scaffold19313:4031	15401
SLG-1	DAFWA3515	0	13	AATTCTTGGGCA[A/G]CACTAAACGCCCCTTATACCACAAGCATCCCTCAGCCAAAGAGTATAAGGGATGTGATTAGAGTCTTGAACCACCTATT	scaffold16097:9875	19539
SLG-1	DAFWA55	0	28	AATTCTCGGGGGTTTCCGGAATTCACC[T/C]TGGGTTGCTACAAAGCGATTGGATAGAAAGATCCAAGTAAATGATTCAATTGATGATCCTACCA	#N/A	#N/A
SLG-1	DAFWA3443	0	24	AATTCCGCTGTCAACAAATTTGC[A/G]CTGCTGCCGGGACGATTTGTTGAGAGGGGAAAACCAACCTCAAGAACATCTTTCAACAAGTACACAAG	scaffold11686:13091	13900
SLG-1	iDAFWA747	0	53	AATTCTTGAAAAGCTGACCATTTTCAGATGCTTTTAGTCTTGAGATGTAATATTAATGCTAAGGAATTGTAAAATAATAGCTTGAATGATTT-AATTCTTGAAAAGCTGACCATTTTCACATGCTTTTAGTCTTTAGATGTAATATGTAATGCTAAGGAATTGTAAAATAATAGCTTGAATGATT	scaffold84029:999-G-d1	8336
SLG-1	DAFWA8424	0	30	AATTCTGGTATATAATTGCATAATGTTTC[T/C]CTATTAGTCTCACCATGCAATCTCTTCTGTTTGTTTTCTGAATTGAAGGCGATAAACAAGGA	scaffold84029:6373	8336
SLG-1	DAFWA5293	0	23	AATTCACCATACCGTGATCCAC[A/G]TATTGGATTCATCATAAAGAAGGTTTCATAAAATTAATGTAAAAAATGATGAACTGCATAGCCAAGTGA	scaffold22186:9290	16803
SLG-1	DAFWA627	0	7	AATTCT[G/C]CATGAGGCGCATGGGCCTAGCTTACCGCATCAGGCGTTGGTCGTAGCCTAATCGAGTCACGCCTAGCCAACATGTTTGGTGTGGA	scaffold6130:4754	17741
SLG-1	DAFWA1535	0	46	AATTCCTCAGTCTCTAAGCTCTCTTAATGCACTTTCTTACTCTAA[T/C]GCAATGTATGAAAATGTATGCTCAAACTTATTTTCTAGTTATGCAA	scaffold7228:14601	33812
SLG-1	iDAFWA110	0	21	AATTCCAAGGGTAGTGCTTAAAAACTTGTTGGTAGGAGAGAATAAACAAAGAAAGGGAAAGGAAAGAGATATTTGAAGGAGAATGAAATTTT-AATTCCAAGGGTAGTGCTTAATTGTTGGTAGGAGAGAATAAACAAAGAAAGGGAAAGGAAAGAGATATTTGAAGGAGAATGAAATTTTTTTC	scaffold97285:2264-AAAC-i4	3878
SLG-1	DAFWA4835	0.523	54	AATTCGAACAACCGCTTCAATCTAATGAAATAAAAAAACAAATTCGTGGGGGA[A/T]GTACTAATAGGCGCTTATTGAAGCCAAAACAACACCCA	scaffold74953:5801	6154
SLG-1	DAFWA929	0.192	8	AATTCCT[A/G]CACAGATTTGCTTGCTAATCATAGTTTAAGGTCTAGGACTTTTACTTGGTGGGATTCAATCTCAGCGATAATCTTTTGGGACTG	scaffold58876:9099	12977
SLG-1	iDAFWA551	0	34	AATTCTATAGAAATCATGGTATTGCTAGACACAAAACCATTCCAAGGAATCCCCGACAAAATGGTGTTGCAGAACGGCTGAACATGAATCTA-AATTCTATAGAAATCATGGTATTGCTAGACACAACCATTCCGAGGAATCCCCGACAAAATGGTGTTGCAGAACGGCTGAACATGAATCTACT	scaffold14838:19931-AA-i2	23624
SLG-1	iDAFWA321	0	34	AATTCAAGTCATTGAGCATGTTTAATTTTTTTTTATTAATCATGACTTGATCTTCATGAAATTTATTTTGGATAGTAAGCAATTTTTTCCGA-AATTCAAGTCATTGAGCATGTTTAATTTTTTTTTTATTAATCATGACTTGATCTTCATGAAATTTATTTTGGATAGTAAGCAATTTTTTCCG	#N/A	#N/A
SLG-1	DAFWA4166	0	34	AATTCTGAAAACGCAGCTTATAAAGAAACCATT[T/C]TGTAGCCCAGTTAATCGATTAAATTCTTGGTTAATCGATTAACGAGATACAAAATTAT	#N/A	#N/A
SLG-1	DAFWA828	0	24	AATTCGACAATCTTCAAATACTT[C/T]AAGAAAGGTAAGAGTAATACGCCAAGAAAGATAAAGTAAGATACACTCAAAGTTTTATCATTACTATT	scaffold10812:7565	17148
SLG-1	DAFWA5549	0	26	AATTCAACCACAGCTAAAGAAGCCT[G/A]GGACATCTTGATTTGAAACCATTCTGGTGGAGACAAGATCAAAAAGGTAAAACTCCAAACACTTAG	scaffold82310:12393	14181
SLG-1	iDAFWA341	0	51	AATTCCTTCAGATAGGTTCATTGATAAATTTGCTCTCCCAACAAAAAAAAAAGAAATCATGAACATTTGTGGGTCTTGCACCTCACTCCATG-AATTCCTTCAGATAGGTTCATTGATAAATTTGCTCTCCCAACAAAAAAAAAGAAATCATGAACATTTGTGGGTCTTGCACCTCACTCCATGG	scaffold6153:3843-A-i1	16740
SLG-1	DAFWA990	0	7	AATTCT[G/A]AATCTTCTCAAAGTGAATGTCATCCACACATTGATGAATAAGGAACAATGCATTGTTGTCCTTCTTCTTGGCTTCCTTAAACATG	scaffold82310:12421	14181
SLG-1	iDAFWA144	0	53	AATTCAAATAGAAAAGAGAAATATAGAAGGGAAATACAAAAACAAAAACAAAAACTTAACAAAAGCAAGAAAATAGGACTACTACTCAGCTA-AATTCAAATAGAAAAGAGAAATATAGAAGGGAAATACAAAAACAAAAACAAAACTTAACAAAAGCAAGAAAATAGGACTACTACTCAGCTAA	scaffold7638:25614-A-i1	28282
SLG-1	DAFWA1785	0	51	AATTCTCTCTCCACACCTAACCTCCAACTTTTCAGTATTGCCAACAATAT[C/T]TGTGCCTAACGGTTTCTTGTGGTCCTCTTTTGTTGACTCGC	scaffold99264:4534	4639
SLG-1	DAFWA1626	0	92	AATTCATTAATGTCACGAATGCATAACTCTAATCGATTGTATAGCTTCTTCACCTTCTTCCCTGTATGGGTTTCAACAAGATTCTCCACTT[C/T]	scaffold14838:20053	23624
SLG-1	DAFWA8214	0	76	AATTCTCAATCCTTGGAAGTTTTCAAGTCTTTCAAGGCTGAAGTTGAATTTCATCTTGGAAAGAAAATTAAGGCT[G/A]TCAAATCTGACCGTGG	scaffold2240:7083	10598
SLG-1	DAFWA3028	0	38	AATTCAAGTATGCCACGAAACCAATCAAACCAAGAGG[T/C]GAGTCACAACAATGATAGAATCTTACAAGATATACTCTAAAGTGTTTACACTCA
SLG-1	DAFWA2506	0	33	AATTCTTAGTATTTTCCTCTCACCCTCTGTCT[T/G]TCGTAATTTCTTTTTGGGTTTAAATCATCTCTAATACTCTCCATTTGAGTATAGTTTAG	scaffold38889:24460	32582
SLG-1	DAFWA3072	0	45	AATTCTCTCTTCTTTTACATCTTCTTGTAATTCTCTTGGAGAAT[T/A]TCTACTCCAAAGTAGTTTAGGTAAGTTACTTTGTAGTTCTTTTCTTA	scaffold20206:5154	8067
SLG-1	DAFWA6485	0	75	AATTCTTCAATTCCTTCTTAATTTGATCTAGTTACTAGTAGGTCATCAACATATAAACATATGATTAGTAACTC[C/T]CCTCGTCTCCCTTATTT	scaffold52926:10593	16906
SLG-1	DAFWA6246	0	61	AATTCACCAAGATTCATTCATATTTGTAAATTGCAAGCTTTACAAGGCCTTCCTTTTATA[A/G]TAAGAATTATAACTACTTCAATAGAAATACA	scaffold82310:8545	14181
SLG-1	DAFWA3083	0	31	AATTCCATGCCCAAGAAGTATGATAGTGTG[C/T]CAAGATCAGTCATTTCGAATTCTGCTTTTAGGCTGTTCTTGATGCTCTCAATCTCATCCAT	scaffold1277:114	23746
SLG-1	DAFWA1931	0	9	AATTCCCA[G/T]ACCAAACATTAGATAGATGGTATCACTTCCTTAGGGAACATGTCCAAAAGAAAGATGTTCTCTTAAAATTTGTTGATACACAT	scaffold45747:2780	6714
SLG-1	DAFWA5413	0	50	AATTCTTTATTTTTCGATAATCAAATTGATTTACATGAAAATTTATAGC[A/G]ATCAAAGTAGGTATTCAGTCTAGAATAAATTTAGTATATTAT	scaffold93491:4128	7822
SLG-1	DAFWA4371	0	73	AATTCTTTATTGGTATTGCAATCAACGAGATGATAATGGCCTAAATTCATGAAAATATAGATGAAAGTGATT[G/A]TCGTTATCTCGTTGACATT	scaffold95531:607	760
SLG-1	DAFWA5216	0	21	AATTCCCCGTAACTAGTGTG[A/G]CCACAGATGAAAGTCTGAGACCCTTGTTGTTCAAAGTGCCAAGTGGTTGCTGATGTTGTGCACGTTTACTT	scaffold178:25532	39720
SLG-1	DAFWA7464	0	47	AATTCTTGTTCCATTTGATAGAGTATTTGTGAAACAAAATATTGTC[A/C]TTTGTATTTCCTTTTCATTATAAGAGGATTTATTGTACTCTTCTT	scaffold14838:18603	23624
SLG-1	DAFWA7773	0	92	AATTCATCGTAGGATAGGGCCGAGGTAATGATGTTTTTGGCGCGAAGGTTGAACTGGACCTTCTTTCGCTCTTCATCGTTCCATAAGCTTT[C/T]
SLG-1	DAFWA7831	0	68	AATTCCTTCATCCACCGGGAAACCTAATTTAACCACCAAGGGAAGTGAAGAAAATGTTACCCATCAT[T/C]CCATGTTAAGCAGCAGCTCTTCTA	scaffold97902:11758	12845
SLG-1	DAFWA2606	0	72	AATTCCCAAGTTATAATCTATGCAAAAATCTATTATACCTATGATTTTCCAACAAAACTAAGTAAAACCTT[G/C]ACCAATGTTCTCTAATCTGG	scaffold178:17854	39720
SLG-1	DAFWA994	0	22	AATTCTATGCTAATGCCTACC[C/T]ATTGAAGGGGGAGGAGTTTGTTAACAAATCTTGGGTGAGGGGGAAGACCATCCTCTTTGATCGGGACACA	scaffold5136:7488	14710
SLG-1	DAFWA3087	0	88	AATTCAAATTTACTTAAAGCTCTTTTTCCATTATTTAATATAAAGCATTTACACCCAAAAGCATGAAAATGAGAAATATTAGGTCTA[C/A]GACC
SLG-1	DAFWA4052	0	44	AATTCTTTAGAGTATCAAACTGCAAATATGCTAAAGAAATGTG[A/G]GATACTCTAGAGACTAAATACAAAGGAACTGAGGAAGTCAAAAGGTTG	scaffold1030:21859	37204
SLG-1	DAFWA4253	0	6	AATTC[C/A]TGAGCCAGCCTACAATGGGGTAGTATGATTGAGTTTAGTCACTATCGTCAAGATTATACTACAGTAATTTTGTGGATCACCTTAAG	scaffold18052:10602	22347
SLG-1	DAFWA2697	0	78	AATTCTAAAATGAGTGAATCTAGAGAGTGATAGTGGAATTCGGGTTCCCTCTTTTAGAAAGAGTAAAACCGAAAATG[A/G]CCCTAAACAATGGG	scaffold19884:4349	10280
SLG-1	DAFWA1116	0	13	AATTCAAATTTA[T/A]TTTTTTCATTTTGAAGACTTTTGTTTAAAATTTTAGTGGAATCCACCACTATTAATTATCCAATCTCCTTATGATATGC	scaffold3065:2468	4303
SLG-1	DAFWA3822	0	20	AATTCAATGCAGATAATAT[T/C]GCATAAGTATACTTACAAAGAGGAGCATTCACATGGTCAACAGAGGCAACAACACAAATATGAGTACATGCA	scaffold99292:2138	6464
SLG-1	DAFWA2526	0	86	AATTCTTCTTTGGCCTTTCTTCAAGTTCTTGATTCTTGTCTTTCTTTTCTTGCATAACACTTTAATCTTTTGAATATACACTCTT[C/T]CAGAAT	scaffold38889:22682	32582
SLG-1	DAFWA3727	0	30	AATTCTAAAATAGAAAACCTGACCATCCA[C/T]GCTAAAATGCTGGAAACACTAATTGCCCAATAAGCTAGTAATCCTAATAGACAAATAGGGAT	scaffold2493:51949	54155
SLG-1	DAFWA5101	0	79	AATTCCCGGGAACCCCATATTGGTTGAAGCAGCTTCCCAATAAACAGGAGACCAAATGTGCTGACAACTACCTATAAA[A/C]TTGTAAAAACCAT	scaffold22735:9794	17356
SLG-1	DAFWA3793	0	57	AATTCTTGCTAGAGTGTTGGTTTTCTTGTAACCACAATAAATTCTCCAATATGCTT[T/A]TTTTGTCTAAAATATCAAGCTTAGGTTATCCAAAA	scaffold47804:8757	10890
SLG-1	DAFWA2658	0	16	AATTCCAGAAACCCC[C/T]GAGAATCCTAAGAGTACTCTCGTGAATTAGGATTCTAGTTTGAATAACTGAATGGTCAGATAGTTGGGTTCACCTC
SLG-1	DAFWA7091	0	47	AATTCTTTTTTTACTACAATTGACTGATATTTTCTATTTTCATATT[T/C]TGAGGGGAATGAGGTGTAAGACCCAGTTTGCTTGAAGATGCTTTT	scaffold6153:3937	16740
SLG-1	DAFWA4306	0	84	AATTCTCGTGATGTGTGGTATCATCAGAGGTTGAGAATTAGGAGTCTTCATTAAAAAGGAAGTCTTGATTCGAGCAAGAGTTT[T/C]GGTTGGGG
SLG-1	DAFWA4054	0	85	AATTCTTGTTCTTGAGTTCAAGTTTAATTGGAAAGTTAAATTTGACACCTGATTTGGATTATCTTCCTTCATACATCATTATTT[C/T]AGGAATT	scaffold2333:7892	30434
SLG-1	DAFWA3078	0	48	AATTCTATTTTGTAATGTTGTGTGATTGTGGACAAATTGTTGTTTTG[C/T]TGTTTTTCTGATTATGTTTGAACTTTGTATGAACATCATTTATG	scaffold178:8861	39720
SLG-1	DAFWA2649	0	23	AATTCTATGAGACAGTGATGAT[C/T]CATGGGGCATCTGAAGATGCTATTCGTCTCCGCATGTTTCCATATTTCCTTAGAGATAGAGCTAAGACG	scaffold2493:52889	54155
SLG-1	DAFWA3738	0	48	AATTCTGCATAAACAATCCAATGCACTTACACTTTGATAACATAGCA[G/T]AAAAATCAACCATATTCTCCCAACAACTAATTCACCCCCTCTTA	scaffold14896:3634	12533
SLG-1	DAFWA6439	0.299	51	AATTCTCTCACTTTCTCTTTATGTTGCTCTTCTCACTTGCTTTTTCATCT[T/C]TTCCTCACAAGTCCCCTTTACATAATGAAAGGGAAGAAGAC	scaffold86743:624	11830
SLG-1	DAFWA2492	0.414	62	AATTCAATAACATATTTTTAATTACAAAATAATTCACACTACAATAGCTGCAATCTGCATC[A/G]CAACGACCACAATGACCACAATCATAGTAA	scaffold12723:656	11205
SLG-1	iDAFWA267	0	63	AATTCTTTCAAATGATGTGTTGTATATGTAATGTTTGGATGATTATTTATGTTCAATTTTTTTGTATAAGTATAAGAATGTATGAATGAATG-AATTCTTTCAAATGATGTGTTGTATATGTAATGTTTGGATGATTATTTATGTTCAATTTTTTTTGTATAAGTATAAGAATGTATGAATGAAT	scaffold19410:1232-T-d1	24226
SLG-1	DAFWA1856	0.371	34	AATTCCCTTGACATTAAGTGATGGTGGAAGGTC[C/T]TTGATGAGCTTAATCTTTGCCTTGTCAACTTCGATGCCCCTGGAAGAGATCTTGTGTT	scaffold4425:20712	25359
SLG-1	iDAFWA68	0.221	54	AATTCGCACTGAATCAGAACTTTATAAATGACAGTTTCTTGACACCATTTTTTTTATTAAATAAAGTAATTGATGTTTCAAAGCTTTCAGTA-AATTCGCACTGAATCAGAACTTTATAAATGACAGTTTCTTGACACCATTTTTTTATTAAATAAAGTAATTGATGTTTCAAAGCTTTCAGTAA	scaffold34070:5158-T-i1	64067
SLG-1	iDAFWA448	0.121	38	AATTCTAATCTATTCATTATTAAAATTATTCATTGAATATATTCATTTAAATCCATTAACTCTAATGAATAGATTTATATGGATTTAATTTT-AATTCTAATCTATTCATTATTAAAATTATTCATTGAATTATATTCATTTAAATCCATTAACTCTAATGAATAGATTTATATGGATTTAATTT	scaffold3225:9789-T-d1	16786
SLG-1	DAFWA3814	0.064	60	AATTCTCTCTTCTTGCACATCTTCTTCTTGTAATTTTCTTGGAGAATTTCCACTCCAAA[G/A]TAGTTTAGGTAAGTGTAGTTTGTAGTTTTCTT	#N/A	#N/A
SLG-1	DAFWA598	1.334	69	AATTCTTCAAGGAAATTTCCCATCTTTTCCCTGTACATTTTAAATGATTTAATTTTGACCGGTAATAT[T/C]AATGTTTCACATTGCGGATTGCA	scaffold85888:1628	2893
SLG-1	DAFWA349	0.057	43	AATTCATAAAAACACATTTTCATCGATTTTGATTTTTTTTTT[A/T]AAATAAAAATATATCAACTGAAACAAAAAAATGTTTTCTAAATTTTTAT	scaffold8483:8158	19083
SLG-1	DAFWA5685	0.594	48	AATTCGACCTCGAATTTTCATCCTTCTTACCCAATTTCCTAACCTTG[C/A]CATAATCTTGCAAAGAATGGCTAAGTGTAGAAAACAAAATTCAG	scaffold15068:8435	10206
SLG-1	DAFWA3752	0.74	42	AATTCTGCCTTCAAGTGTTTTTTTGAGGCAAAATTCCATAC[C/T]GTTGAAATGGCCTCTATTTATAGGCAAAATTCCATACCGTTGAGCTGCTG	C27508047:77	152
SLG-1	DAFWA1829	0.021	85	AATTCAGGATTTGGTTGAGGAAGACCATTATATCAAAACTTTCTCTCAAAATGTATAGCAAAGAAGTAGATTTGAGAATATAGA[G/T]TAAGGTA	scaffold11569:1267	16686
SLG-1	DAFWA3608	0.278	19	AATTCGATGTGATCGATG[G/A]GACCAAAATGTGGTCCGAAGCGATTGCGCTGCAGTTGCATCATTGTGAATGAGTGTCGCACAATTGTGGTGTG	scaffold2770:8167	29798
SLG-1	DAFWA456	1.171	75	AATTCGATATGGTGATCAAGGACAAGAAAGGAAGTGAAAACTGCATAGAAGATCGTCTATCAAGGGTAGTGAAT[T/C]AGGAGGTGACAAGAAAC	scaffold1311:4773	31532
SLG-1	DAFWA3656	0.078	56	AATTCCTAGAACCCCTACCTTGGTTTGACTACTCTACTGGCCTAGGAAAACATTT[C/T]CTACGATCTAACCTCAGCCAAGAGTATGTTCTAAAC	scaffold9766:180	6359
SLG-1	iDAFWA327	0	23	AATTCATCAATATCACACTATTGACAACATTATTGGTGATATAAGTAAGGGAGTCTCTACTCGCCTGAAACTGAATGATGCTTGTCTAAACA-AATTCATCAATATCACACTATTGCATTATTGGTGATATAAGTAAGGGAGTCTCTACTCGCCTGAAACTGAATGATGCTTGTCTAAACACGGC	scaffold45747:4217-ACAA-i4	6714
SLG-1	iDAFWA287	0	65	AATTCGATTCTGCTTCTAATTCATCATCAATTTCACCTCAGTCACTTTCTCACCGTTTTTGGGTAATACCATTTTCTATTTATTTATTTTCT-AATTCGATTCTGCTTCTAATTCATCATCAATTTCACCTCAGTCACTTTCTCACCGTTTTTGGGTATACCATTTTCTATTTATTTATTTTCTT	scaffold29760:1174-A-i1	26159
SLG-1	iDAFWA559	0	47	AATTCATGGCCTTGTATATATATTGTGAATTAAAATATACATATATACATATATAATTATTTACAAGTTGAAGTTGATGTGATATCTAGAAT-AATTCATGGCCTTGTATATATATTGTGAATTAAAATATACATATATAATTATTTACAAGTTGAGGTTGATGTGATATCTAGAATTACTGAAT	scaffold2847:55658-CATATATA-i8	85678
SLG-1	DAFWA5806	0	73	AATTCTCCGCCATGGTCGGATCGAATGTAAATAATCTTTAGGTTAGAATGGTTTTGGATTTTCTTGGCTAGA[C/A]ATTTAAAAGATTTATAAGC	#N/A	#N/A
SLG-1	DAFWA3999	0.114	38	AATTCTAACAAGTTACCTTCTCAAACTGTGATTAACC[C/T]ACAGAATGTGAGTGCCATCACCCTAAGGTGAAGCAAACAAATTGAAGATGATCT	scaffold19752:25974	49182
SLG-1	iDAFWA459	1.209	44	AATTCAATATTATAGATCAATACTCCAATAAATTTATAAAAAAACATAAACCTCAACAATACTCTTATAAATTTTCATAAATTCAATGCTTT-AATTCAATATTATAGATCAATACTCTAATAAATTTATAAAAAAAACATAAACCTCAACAATACTCTTATAAATTTTCATAAATTCAATGCTT	scaffold96132:2473-A-d1	3555
SLG-1	iDAFWA29	0.12	76	AATTCTTTCTCACCATGAGAAAAATTGCTCATGTTCTGAAAACTGATCTCTCATGGTAGCGGAAAAAGCTGAAAAAACAAGAAGAATAAACT-AATTCTTTCTCACCATGAGAAAAATTGCTCATGTTCTGAAAACTGATCTCTCATGGTAGCGGAAAAAGCTGAAAAACAAGAAGAATAAACTG	scaffold17664:11859-A-i1	12991
SLG-1	iDAFWA376	0.371	53	AATTCCTCATATGTGGTAGAAGTTTGTCATATTACTTCCCTCCAAAAAAAAAATACTTTTCTTTTTTATACTTTTCAAGAATAAAACTAATT-AATTCCTCATATGTGGTAGAAGTTTGTCATATTACTTCCCTCCAAAAAAAAAAATACTTTTCTTTTTTATACTTTTCAAGAATAAAACTAAT	scaffold5797:8655-A-d1	31546
SLG-1	DAFWA7099	0.343	44	AATTCCTTATGATTGGTGAAATATCAATCCTATGATCTTGAAT[C/T]TCATGATTCTCACACACATATATATAAAACAAATGGTGCAGTGTCATA
SLG-1	DAFWA1740	1.453	6	AATTC[G/A]CCACTCACATCCTGCACCAAAATGTTTACATTTGACAACGTATCTGTCTGGTCTAGACTCTGCAACAATATAGTCAAACGAATTTT	scaffold49616:1872	7492
SLG-1	DAFWA3456	0	79	AATTCGTCGTATGATAGGGCCGAGGTAATTATATTTTTGGCGCGAAGGTTATCCTGAACATTCTTGCGCTCCTCATCG[A/G]TCCATAAGCCTTT	scaffold5336:1430	17991
SLG-1	DAFWA1023	0	69	AATTCGAAGGGTAATATTGACAGATATAAAGCTCATCTAGTTGCTAAAGGCTAAACTCAGAAAGAAGT[T/C]TTTGACTATGAAGAAATCTTCTC	scaffold362:11854	41484
SLG-1	DAFWA6059	0	19	AATTCATTCCAATCCTAA[T/C]AGTCATGTGGAATATGGTCATTGTTTGTAGGAGGTTTAACAATACCACTCGGAAGAATCATTTTCTCATATCT	scaffold82764:17587	24165
SLG-1	DAFWA5854	0	24	AATTCTTTGTATTCATGGGGCTG[C/T]TTTTAATGTTTAAGAAGTTTGTATTTTTGTTGGTATTTGAACATGGTTAAAGGTGATGATTTGTATAT	scaffold7706:22700	38771
SLG-1	DAFWA3816	0	23	AATTCATACAATCATAAATGCA[T/C]ATGTTTAATTTTAACAAATCAATGTTTACACATGCAATTTTAATAATAAAAATTATTAGATTTTTTTAC	scaffold86213:8249	11267
SLG-1	DAFWA7660	0	71	AATTCTAAGCACTTCTAATAGATTTCAAAGTATTTCTCTTCTTGTTTTCTCAATCTCTCACATCTACGCC[G/A]TTAGATAGTTATCATCTTTTA	scaffold25008:20283	26324
SLG-1	DAFWA1368	0	30	AATTCCCAACGTCAACATAATGGTTTCAA[T/G]AATATTTCATTTGATAAAAAACTTAGCTTTATTGAATTATTAACAACTTCATACCATCTCGG	scaffold8388:2441	16956
SLG-1	DAFWA1152	0	39	AATTCAACAGCGCTTTCATAAAAATACGCTGTTGAATA[C/G]TTATCTCTCATATTATTTTCTTTTAGCTATACAATAGCACATTTTAGAAGAAG	scaffold3966:11416	16310
SLG-1	DAFWA2349	0	79	AATTCATTGGAGTATAGGAAGCTTGGTGACTCTGACCTTAACATTAGTGAAATCACTCTTGGTACTGTAAGTTTACTA[T/G]ACTTATCTTCTCA	scaffold37091:18830	19408
SLG-1	DAFWA8090	0	92	AATTCTTTCACAAAAAGTATATGTACTCACTAGATCAGGTTATAAGTAGTGTAAGTAAACTATAAAAGCATATATAGAAGAAGAAGAGTAA[A/G]	scaffold13440:4315	15020
SLG-1	DAFWA4977	0	77	AATTCTTTCAAACTACTCTTTAAAATTTAATGCTCTCTTAGAACATTTTTTTCAATTTGGTTTAACGGGATAGTTT[A/G]AAATTTTTTTATTTC	scaffold2366:5047	18034
SLG-1	DAFWA7105	0	58	AATTCTGTCTTCCTAGATCACTGCTTTTACCATTCACATTGCCCAACAATTCTTCCC[C/G]TGTTTAAATTGTGGACCGCATCATATGATGCGAC	scaffold73247:2546	8259
SLG-1	DAFWA5606	0	73	AATTCCCGGACGCCATCTCCTGCTACATGGTGACCATCATTCTCATCATCGTTGCTATTTGTTCCTTCAACT[T/C]AGTCACCTCAGGATTCCTT	scaffold33883:5839	9392
SLG-1	DAFWA1051	0	46	AATTCACATTTATTGCCCCAGTTGTAACGGACGTAATAATTTCCA[T/C]TTTTCCACCAGATCCGTCAGCCATTATTAATCTAATATAAGAATAT
SLG-1	DAFWA8688	0	74	AATTCTAGGTATAATGGTGAATGATATGTGTGATATATGATATTTGATTCGAATCAAATGTGCCTCTATTTTT[G/A]GAAGTTTTCCTGGATCCA	scaffold24053:608	6676
SLG-1	DAFWA7549	0	64	AATTCCATTATGCATTCCCGGGCTAAACATATTGATATAAGGCACCACTTCCTTAGGGACCAT[G/A]TCCAAAAGAAAGGTGTTCTCTTAGAATT	scaffold362:33057	41484
SLG-1	DAFWA5188	0	59	AATTCTGAAGTGGGCCATTGAAGACGATGATCTTAAAGCAACTATCTTGGATTAGTAT[G/A]CACATGACTGTAGGTCTCCAATGTTATGTGTTC	scaffold50087:371	6737
SLG-1	DAFWA1868	0	42	AATTCCAAAAGCTCTTTATTTGTAGTTTTTTTTCACTTTTA[A/G]TACACCATCTTTTTATGTCTGCCTTTTTGTTTTCTAAGGAGAATTGGGAA	scaffold13440:4186	15020
SLG-1	DAFWA1261	0	31	AATTCAATTCCGAGTTACAAAACTAAAAAA[C/A]TGGGCAAAAACTCGATAAAACGACCCGAAATCGTCTCAGAAACTTTTATTCTCCAAAAATC	scaffold5765:4635	31605
SLG-1	DAFWA3092	0	86	AATTCTCTTATTGTTTTTCTCTAATTTTTTCTTCATCTTCTTAGTCTAATATATCATCTTCCTAACATTTTGGTACTTTCATCCT[C/T]TGAACC	scaffold23461:6756	9114
SLG-1	DAFWA1734	0	79	AATTCAATGAGTGAGCAAAAAATGACAAGTATTTTGTTCAAGAGTAATTGTAAGTTTATGGAAATTGGTTGACTATTA[C/A]TATAAAGAAGAAG
SLG-1	DAFWA6046	0	33	AATTCAAATCCTGTCATTTTTTCCTTAAACAA[T/G]AAATAAATAACTCCACATATGTAGTATACCTAAAACATAAGTGTTTTACAAATATTTAA	scaffold31014:3788	11345
SLG-1	DAFWA7352	0	67	AATTCATGCCAAATCACAAGCCAAAAGCTCAAAAAGAAAATGCTCAAAACAAACAAGCTAAGCACG[A/G]CATGCTATGTCCTTAGCTTGTCACC	scaffold21565:25193	29565
SLG-1	DAFWA3254	0	91	AATTCAACCAAGTAAAGAAAAAGTAAATGACAAGAATAAGTAGAAGAAGATTACACAAAGATTTTTTATACTAGTTTGCCTTCTTGTCCA[C/G]C	scaffold362:30479	41484
SLG-1	DAFWA8439	0	7	AATTCC[T/C]GCGTCTGCAGTAGGGGAACATGTCAGTTGGGGAGTATGCTATAGTGTTTCAAGATTTGGTGAGGTATGCCCCACACTATAATCAA	scaffold5765:9760	31605
SLG-1	DAFWA4465	0	60	AATTCATTTTTTCCTTAAGCACCACTATCATTCCCCATTTCTTCCAATCAACTTGAACA[C/T]GACTTACCCAAACACTATCAGAAATGGAGTAT	scaffold82764:17513	24165
SLG-1	DAFWA5871	0	34	AATTCCTTTGTTGAGCCATCCACTCTATGTTCT[T/C]CTACATTCTAGCTGCCTTGTCTTAAGCTCTTTGCATCTAATATCTTAATCATGACATC	scaffold7706:11776	38771
SLG-1	DAFWA6472	0	22	AATTCAACCAAGTAAAGTAAA[C/T]GTAAATGACAAGAATAAGTAGTGGAAGAGTACACAGAGTTTTTATACTTGTTCGCCTTCTTGCCACCGAA	scaffold362:36577	41484
SLG-1	DAFWA1270	0	49	AATTCAGAATCCAGGAAACCACCGATTGATCAAGTTCTTCCCAGCGAA[G/A]GTATTCTGTTCCTAACACAAACCGATTCGCACGATTCGATGTT	scaffold37091:9479	19408
SLG-1	DAFWA4502	0	33	AATTCTTTTACTCCAAGAGACGATGTTAGAAT[T/G]TTTTTGGCTATAAGGTCATACTGGAGTCTATTTTTATCTTCTTTGGTCCATCAACATTT	scaffold362:36842	41484
SLG-1	DAFWA6092	0	87	AATTCTTAGGTATCTTCAAGACACAAAATCTTTGGGTTTGTCCCTTACTCCTGCCAACTGAAAGAGTGGCCTTTCTCTAACTGCCT[C/A]TTGTG	scaffold37091:13415	19408
SLG-1	iDAFWA693	0	26	AATTCTGTAAGAATTTGTAGTGTGTGTGAATGATGTATTATGACTTTTATGTTACTTGGACCCAATATAAATGCAAAGAACTGCAACATATT-AATTCTGTAAGAATTTGTAGTGTGTGAATGATGTATTATGACTTTTATGTTACTTGGACCCAATATAAATGCAAAGAACTGCAACATACTGT	scaffold37091:3466-TG-i2	19408
SLG-1	DAFWA3723	0.718	38	AATTCCAGATAATCCTAAAAGTTCACTTATCGCCATA[G/A]TATGCATGTAGTCTTAATTGTAACATGCATTCTTGCTTGTATATACTTTTATGT	scaffold6659:7036	15805
SLG-1	DAFWA6605	0	69	AATTCTTTTTCCAACTCAAAAGTGAATTTGACTTGGACTTTGCATGAATCTTGATAGAAGACTTGTAG[A/T]ATACATGATATCTGGTCTTGTGG	scaffold40266:8679	12647
SLG-1	DAFWA5658	0	47	AATTCAAATGTTTTCAATTTCTCTTACCTTCTAGACTAGTATAGGC[C/T]GGAAACAAGATGTAAACACAAAAGGGAAATATTAGAGAAGTTGAT	scaffold6659:1416	15805
SLG-1	DAFWA954	0	42	AATTCTTAGATACTTACAAGGAACAAAAGAGTTTGGTATAC[G/A]GTATAAGACCAACACCAACTCAACATTGCACGACTACATTGACAGTGATT	scaffold40266:8573	12647
SLG-1	DAFWA5554	0	52	AATTCTGTTTTCACCATAACTAAACCAACTAATCAATTAAGTAGTTTAGAT[A/G]ATCGATTATTAGCATATCGAATTAATCAATTAAGTTGGGT	scaffold6659:4143	15805
SLG-1	DAFWA7195	0	53	AATTCATTAATGAGGTGTTTACCTAATAAAAAAAGAATATAATGAAACTCTA[A/T]CTCTTAGTTTTTATTACAAATAGTCATAATACAAGACTA	scaffold40266:11023	12647
SLG-1	DAFWA3484	0	16	AATTCTTTATCCTTA[G/A]GGTCAAATAGGGGAATAATATAAAAGTATGGATTCATCTCTTAGTAATTGAACATAAAGAAAAACTTGTTGAAAAA	scaffold25495:3926	16904
SLG-1	DAFWA8297	1.453	66	AATTCAAATTATGAAAGTAAAAATTGTTAGGAGATCTTCATTGATGCGCTATAGCATTTTTTTCA[C/T]AGCCTAAGTGAAAGAAATATATTAGT	scaffold18502:5711	15986
SLG-1	DAFWA2412	0	41	AATTCAGATACCTACGAGTCTAGATACCTCATTATCTGGA[T/C]TCGTATCCATCCAACAGTTAGTCTTAATTACCCTTGGATCTAAAAATACAA	scaffold9732:141	15898
SLG-1	DAFWA6920	0	76	AATTCAAAAGTAATATGAATTTAGGCTGCAATCATAAAATTTGTTTTTCTTCATTCTTTCTCCTGTTTTGCTGGA[C/T]TTTTTTGAAAAGCTGA	scaffold28957:12294	31498
SLG-1	DAFWA1200	0	39	AATTCATCATAAGGGACTCTAAAAGGTATTCTTGATCT[T/C]CTATACTCATTAGCCCCTAGAACCACATTAAAGTCTCCAATACAACACCAAGG	scaffold31896:16883	18473
SLG-1	DAFWA8215	0	54	AATTCATGCAGGAGCATTTCAAATAATTTTTATAGCCACCATCAACATATATA[G/A]GCTGCTTTCATATGGTTTTGAAGTATCAACAATAAATA	scaffold5765:20528	31605
SLG-1	DAFWA3948	0	86	AATTCACATTATTAGATATTAGTAATAGATTATATTTGTTTTTTGTTTACCTTGGCCTGCCCCTAAGGTGCTGGAGAATATTGAT[G/T]CAAGAG	scaffold77466:2884	11196
SLG-1	DAFWA3395	0	50	AATTCTTTAATAAAAAGAGTGAATTACACTGATACCCCCTGAGTTTTAG[G/T]GAAATTACACAAACCACCCATACCTTTTTAAAACCTACACAA	scaffold18502:5822	15986
SLG-1	DAFWA2037	0	41	AATTCTTGTCATTTCTTCTCTTTGTGATGCTTGGTCTTGA[T/C]GTTGCGGTTCATTCTAATTTCATCATTTTCATTGGAAGAGGTTCAAGGTGG	scaffold18625:5912	6825
SLG-1	DAFWA6377	0	74	AATTCCTCAATTCTTTCAGCACGTTGGCTCTTCGGAATCAAAATGACACTTTTGGAGTTTATGTTAGGCAGCA[G/A]CCAACTTTGTTGAAAAAA	scaffold71522:10251	16075
SLG-1	DAFWA6842	0	63	AATTCACTATGACATAACTATGATCATTTGCTCATAATGGGTCATATTAGCTTCGCATGCTG[C/T]AGTGTATCTTTTGACTAGTGGTCCAAGTG	scaffold5765:14449	31605
SLG-1	DAFWA3059	0	84	AATTCCAAATTCTAAATTAGAGAATTATAATGTAAAAAATAAATGTAAAATCTTTGAGGGAGAACCCTTATTTATCCTAATTA[T/C]AAAATATT
SLG-1	DAFWA6443	0	58	AATTCTCTCATTTTATTATGATACTAAGTCGTCATTGAAGGTTTTCGACTTAGCACC[A/G]CTCTCCTTTTTTTAGGTCGCCCTTGCGGGTTTTC	scaffold28957:27331	31498
SLG-1	DAFWA1748	0	26	AATTCACATTGGGTTACTACGAAAC[T/G]ATTGGATAGAAAGATCCAAGTAAATGATTTGATTGATAACCGAACAACAAGAGTAGGTGCGACTTC	scaffold17664:9917	12991
SLG-1	DAFWA7739	0	83	AATTCCTCAATTATCGAACAAGTGAGTAAGTATGTCCAGCAATGGAAAAGGAAACTATATTTATGAAGATGTATAAGCAGCT[T/G]CCCAAAATC	scaffold11703:10929	11100
SLG-1	DAFWA385	0	83	AATTCAACAAGCTTGATTCATGGAGTTTATTTCCTATTTTGTTTAGAGATAATTGAATTAATCATCACTCAAATTCAAATTC[A/G]AAACAAGGC	scaffold18502:7168	15986
SLG-1	DAFWA3696	0	14	AATTCGAAAGTTT[G/A]CATTCTAGCAACCTTATAAACTCAATGACTATTGAAAATGAATCACAATGGAATTAAGTTTTGAAATTTTAATTATTA	scaffold32222:6871	15047
SLG-1	DAFWA8417	0	41	AATTCAGAATTTTTTGCAAGGATCATGGTATTATCAGACA[C/T]TATACCGTGAGGCACACTCCACAACAAAATGGACTTGCAGAACGAATGAAC	scaffold1028:16715	20254
SLG-1	DAFWA4441	0	20	AATTCAAGATTCCGATCAC[T/A]CAAATATACCAAATGATGACCAGCCTAGGGGTGATGCTAGTAAAGTCCAACAAGAAAAAAATAAAAGAGCAA
SLG-1	DAFWA3183	0	7	AATTCA[G/C]TCTTTTAATTATGCCTGCACTCACTATAAAATTTTGTAATTAAATTCCTGAAAGGCTGAAACCATAATAGTAAGACCACATAATG	scaffold85540:6348	15075
SLG-1	DAFWA4612	0	18	AATTCTTGATGGTAAAA[C/A]TGCCATTAGACGCTCGTACATGTGAGAGTTATCGTTCAGATGACTTAAGAAGTCTTGTCTGTATGGAGCCCTCT	scaffold5765:7104	31605
SLG-1	DAFWA5181	0	34	AATTCTCTACCAATCTGCGCTTCTTAAACATAC[C/T]CTTGTCCAGCTCAGTCACAACCCGTAGCTCAGAATCATCATCGCCTGTTCAATTCAAT	scaffold5797:11616	31546
SLG-1	DAFWA1435	0	12	AATTCTCCATC[A/T]CCTAAGTGTGTCGTGCCGCTAGACTCTCTATTTGTAGGTGAGCTTACTTGATCCGATCTCCTCTCGAACTCTTCATTACG
SLG-1	DAFWA4419	0	54	AATTCTCATCATGAGTCAGATAACTAGTTTCATGCACACTGGTTCTATTTTAT[G/A]ATTGTGCTGACTACCAGTTTGGATAGTCGTCTCTATTT	scaffold28957:12044	31498
SLG-1	DAFWA7359	0	87	AATTCACTGATTGATTTGATTACTACACCATTGTGTACTTATATACAAGATGCCTTGTTGACCAAGTAATAAAACTAACTTAACTA[A/T]CTATC	scaffold22749:1248	12912
SLG-1	DAFWA3729	0	21	AATTCAATCTCATGCTTATA[T/A]AATATTTGTCTTGTTTTATTTTGTTGGATTTAATATGTATGCATAAGCTTGAAATGACAAATTAAGTATTT	scaffold32222:4933	15047
SLG-1	DAFWA3026	0	14	AATTCCCATCTGA[G/A]TATTGGATACACCGGATCTCAGCTCTTTATCTACTTGCATCGCCGTTGGCTTATCCTTTCATCAATGGAACACGCCGC	scaffold1028:4720	20254
SLG-1	DAFWA5907	0	77	AATTCCTCAAGAGTTGCACTCCTCTCTACATGCAAAGGTGGCAGATTTCTTATTGGATTCAAAGTGGCGAATACCA[A/G]GGCCTCTTAAAAGGT	scaffold71522:11715	16075
SLG-1	iDAFWA734	0	56	AATTCTTCTTGTGATTTTATCAATAAAACAATGTTATTTTCCAATCAAAATCTTAGAGGACATAATGTTTATCTTTAAGGTGATAGTTAAGT-AATTCTTGTTGTGATTTTATCAGTAAAACAATGTTATTTTCCAATCAAAATCTTAGGACATAATGTTTATCTTTAAGGTGATAGTTAAGTTT	scaffold83553:3288-AG-i2	4059
SLG-1	DAFWA4206	0.242	20	AATTCGCACATACAACATG[G/C]AATGGGTCTGAAATTATCTAGTTCTTGCCATAGGCGTTTCAATTGAGTGTAATATGCATCAATTGAGAGGTT	scaffold48520:12086	18369
SLG-1	DAFWA7746	0.27	15	AATTCACACCTTAC[A/G]TGAATTTGTCTACATCATTCTCCGTTTTCACCTAAACATGCATGCAATTTTATAAATAATGATCGTGTTCATTACAA	scaffold11078:12431	21827
SLG-1	DAFWA4135	0	8	AATTCCG[A/G]TTGCACCGTTGGCTTCGTAATTTCATTTCGAGTCAATATAGACCCTGATTACACTCATACCTATTTTCTAAATATTTTTCATTC
SLG-1	DAFWA7528	0	14	AATTCTTGTGAGG[T/A]GATCTAAAATATAAGCAAAATTTAACTAATTTCACTATTAAGTAATGGGATCCCTAAAATACACTTCTCTTACTTCAA	scaffold35365:5221	7370
SLG-1	DAFWA3680	0	57	AATTCAGTGAATTTAACTTTTGGGACCTATTTGAAAATTCAGTGAAATTGTAGGGA[C/T]CAAAAGAGTGAGTTTACCTAAAAGTTATTTGGTGT	scaffold85540:6289	15075
SLG-1	DAFWA947	0	45	AATTCCTGGGAGATGTTAAACCCAGAGTTGAATCGCTTTAAGCT[C/A]ACTTATATAATGATTCCAAATTTTTTCTTAGGAAATCCTGTTAATTT	scaffold85540:4125	15075
SLG-1	DAFWA6280	0	92	AATTCAACTTAAAGTTTCTTATTAAACATGTACACTAGTAGGAGCACTCCAACATGCCTACACATCTTCTCTAGAACTCAAATGTGCCATT[A/G]	scaffold48520:6087	18369
SLG-1	DAFWA8033	0	56	AATTCATTGTGTTCATAAGTATTATTCATTTTCTTCTTTTATGTGATATTGGTGT[A/T]TTCATCAAAACCTTACCAAAGTCAGGAGGTAGATCT	scaffold38921:712	4376
SLG-1	DAFWA2796	0	13	AATTCACATCTT[T/C]GATCATGTCACCCAAATCTGCGGCCACGGCCGCAAGAACTTCCATCATCTCTTCATTAGATGCAAACCATTTCAACAAT	scaffold28957:20366	31498
SLG-1	DAFWA7796	0.2	87	AATTCATTGCAAAATAATTATTTGAGGCCCCGATGGGTAGAAATTGGGCTAGCTTAAGCCAACCCAATCCCTCCCTACCAATAGGC[A/G]AGTTC	scaffold11078:10872	21827
SLG-1	DAFWA1487	0	36	AATTCATATGAATGCCTTCCTTATTTAGTTTGGGC[G/A]TGAAAACCAAGGAACAAATTTCCTTAATGGTTTAGGCGTGACAAATCAAGACTACA	scaffold16139:1974	6972
SLG-1	DAFWA7138	0.717	58	AATTCTAGCTACAAAAGGATATGATAAATGTGCTGAAAAGGCAAGTTCAATACCTTC[G/A]CTCTTATTATTTGTGTAAATATAACTTCAATTGT	scaffold87287:1223	2915
SLG-1	DAFWA6025	0	65	AATTCACGTGAACTGGAAATAATTCTTAAAACTTGATTTAATTACTTTAAATACTTACGGAATA[G/A]ATGAGAATAAAAATGTAACTTGAAGAA	scaffold17626:445	20001
SLG-1	DAFWA589	0.257	35	AATTCCAATTTCTGCAGGAGTGGATACTTTATTG[T/C]ATTCCATCATTTGAAATCTCTTCAACACATCAATAGTGTACTTCTTTTGGTGCATAA	scaffold54569:866	1426
SLG-1	iDAFWA269	0.185	44	AATTCTCATGGGTTTTCTTAGGATTTTATGTATTTATTATTTTAGTGTTTCATTTATTTACATGTAACATGGGGTTGGGAATTTAAATTCAT-AATTCTCATGGGTTTTCTTAGGATTTTATGTATTTATTATTTTATGTTTCATTTATTTACATGTAACATGGGGTTGGGAATTTAAATTCATT	scaffold9180:15412-G-i1	16026
SLG-1	DAFWA436	0.27	86	AATTCCTGCATTTGATAAAGGTGTTACATTTTATAAAGGTTTTACATTTTAAATGGTAATAAATAATTTCTTGATAATTTAAAAA[A/G]AACATT	scaffold9766:916	6359
SLG-1	DAFWA5582	0.079	82	AATTCTATCAGGTTCAAACTCTCCTTTGCTTTTCATTTCCCTCTAGAGAAGCAGAAGGAAAACCATCAGGCTCTATCATCT[A/G]GAAGATCTTC	scaffold29760:25558	26159
SLG-1	DAFWA3834	0	52	AATTCACCTATCAAAATGTCCACCTTTTAATAAAATAATAATAATAGTAAT[C/T]AACTCTTGTACGTTATACAAGTTACAAGCCCCAACCTACC	scaffold95716:617	2024
SLG-1	DAFWA6316	0	30	AATTCTAGGGTTTAGGTAAGTGGTACCTG[G/A]CCCAAGTCTTATCTTCCTACCTTATTTGAGTTGAAAAACAATACATAGTGTCGAACTGTCAC	scaffold14838:13841	23624
SLG-1	DAFWA4637	0	89	AATTCCTTATTTGTGATGTGTGGTACTTAAGTTCTTCTGTAAAATCTTTAAATTTTGGGATGGTTTTGTGGCAAGAAGATTGAGCTGA[C/T]CAT	scaffold178:26224	39720
SLG-1	DAFWA2785	0	35	AATTCATGCGTTGAAAAGTAAGAAATCTCCTATA[T/C]AAATCATTACATCTAATTATGACTTTGAGAGGCTCTTTCTATTAATTTGGTAACATG	scaffold39335:15595	17368
SLG-1	DAFWA4882	0	44	AATTCAAGAGGAGAAAAGAAGATGGCCAATGAGATGCAAAAAT[T/C]AATTTTGTTCTCTCATTTGGAACTCAAAAGCATCCAATCCTTGGATGG
SLG-1	DAFWA2694	0	17	AATTCTTTTCCAAGGA[T/G]AAACCACCTGATCCTCCACCTTTAAGAGAGATTTGTTTTTTACATTACCTCCAATGGATATCTTTCAATGGGTGA
SLG-1	DAFWA8451	0	73	AATTCAAAAAGCGAATAAATTCAATTATTATTGTTCAATAACATCTAGTTTTTTATCAATCAATAACTATAT[G/A]TGGATGGATGTTAATGTTA
SLG-1	DAFWA7117	0	60	AATTCAATGCTCATCATCATTTTTTATGGTTCAATTTGAGATATGAAGGTTATGTTTAT[A/G]CACTCTCACTACATCATCCACCATTCATATTT	scaffold2847:20825	85678
SLG-1	DAFWA7560	0	55	AATTCAAGTATGCAACGAAACCAATCAAACCAAGAGGCGAGTCACAATAATGAT[T/A]GAACCTCACAATATATACTATCTAAAGTGTTTACACT	scaffold9766:4874	6359
SLG-1	DAFWA3438	0	36	AATTCCACCTCTCCTTGGTGGTGGTCCTCTTTGGT[A/G]CTGAATTTTCTGATCATTTAATGTCATGAACTCAATTATATCAATGGCTTCTTGTG
SLG-1	DAFWA7584	0	23	AATTCAAATTAACATGAAAAGA[C/A]AAAAACAAAAGGGGGATTTGTGCAGGTCTGAAACTCCAAGGCGCTGTAGTTAGGTAAAATTACAAATGC	scaffold99292:4032	6464
SLG-1	DAFWA678	0	48	AATTCTCAAAAGATAAAATCAATCATAACTAAAATGAGACTTACATG[C/T]GTACATACATGATCTACATGCATATGCATACATACATGATCTAC	scaffold7872:4453	5893
SLG-1	DAFWA8722	0	58	AATTCCTCATTTAATTTTCTCCAACATCAAATATCTATACTCTCTTCTCCCTTTTGT[T/G]TCTTTCTTAATTGAGTGTGAGTAAGTAACAACAT	scaffold94189:1199	2068
SLG-1	DAFWA8484	0	28	AATTCTTCTAAAGAAATGCAAGAATCA[A/T]GCAAGAAAAGATAGCAAAGTTTAACACATTAATCACATTCAATTGGATGACAATTAAATCCTAA
SLG-1	DAFWA6480	0	42	AATTCATTCATTGTATCCAAAAATAAAAATCTTCATTAATT[G/A]ACGTATGCATTCATTCATTGTATTCCATAATAAGAATTGTCATTGATTGG	scaffold18052:13235	22347
SLG-1	DAFWA4976	0	14	AATTCTAAAATTA[C/T]GCAAGTATTTAACTTACCTACACACCCTACGCCACTTGTTTCAAAATATATACTTAAATCCCCTTAGGCTTCATTTGG	scaffold19704:49752	52918
SLG-1	DAFWA5846	0	13	AATTCCAAATGT[G/A]TAGTACCAATAATACTATTACTCCTTCTGAATCTGGAAATTCGAAGTTGCAGATGACGATTGAAGATGAACAACATCAA	scaffold29760:906	26159
SLG-1	DAFWA3313	0	68	AATTCTGCAATCTTCAAATACTTCAAGAAAAATAAGAGTAATACGTCAAGAAAGATAAAGTAAGATA[T/C]ATTCAAAGTTTTATCATTACTATT	C28291955:92	347
SLG-1	DAFWA7790	0	20	AATTCATCCTATGTCTAAT[C/T]CGTAATCCTGCAATTGTTGCTTGAGACATAATATATGGGCATAACAACTTCCTGCAGCTATGTATTCTGCTT	scaffold45747:2862	6714
SLG-1	DAFWA5275	0	42	AATTCACATTATTTTTTGTTTTTCAGACCCATAAAAAATGT[C/A]ATTTTCAACTAAAAAATACTTCAACAATTTTTCTTAAAAGGTAAAAAATT	scaffold7051:40427	76121
SLG-1	DAFWA8663	0	80	AATTCAACAGAACAATTGTTAGTGAGACATAGTCTGGAAACTGATAACAAATTGGATTGAATATTAGGAACACATAAAA[A/C]ATTATTTAGGTA	scaffold70268:5116	6992
SLG-1	DAFWA3976	0	48	AATTCTGCCTTAGAGTGTTTTTTGAGAGAATTTAGTGAAGAAATGCT[T/C]TATTTCAATCTGTTTTGCTTGAAGGAAATGGCCTCTATTTATAG	scaffold45621:8149	8226
SLG-1	DAFWA8737	0	72	AATTCAAGAGGATTATGAAATCTTAACTTGACATGACTGATCTAGGAAGGCTAAGCTACTTCCTTGGTATG[T/G]AGTTTGCATACACCACTGCA	scaffold52926:10735	16906
SLG-1	DAFWA3285	0	54	AATTCTTTTCACATTGAAGGTCATCTCGATACTGATTATATCTAGAGGTTTTG[T/C]ATTTCAAAACACCTTACAAGAATTATTTATGGAGCCCA	scaffold2847:78249	85678
SLG-1	DAFWA2466	0	78	AATTCTTTTTAAACTTTGAAGTTGATTGGTATGTTTCATTTGTGAGGTAGATTTTGGAGATGAATAAATGAAAAGAG[C/A]AAACTTAAGAGTCA	scaffold29835:485	12530
SLG-1	DAFWA2353	0	19	AATTCCTAGAACCCCTAC[C/A]TTGGTTTGACTACTATAATCACCTAGGAAAACCTTTCCTATGATCTTGCCCCAACCAAGAGTATGTTCTAAAC	scaffold10812:6455	17148
SLG-1	DAFWA8852	0	61	AATTCTCGAATTGAACTCAACAGATGCTATGTTGGCTCAACATAAACTACTTCAACAACA[G/A]CTTGATGAAGTGAACCAAAAGCTTAATGATT
SLG-1	DAFWA8775	0	73	AATTCTCATGTATAAGATATAGGTAGCCGTACTTAGAGTAATCGTCTATGAACGTAATAAAATAATGTTGTC[G/C]ATTCCAAGAAGCCATAGGG	scaffold2240:6939	10598
SLG-1	DAFWA3574	0	21	AATTCTCTCCTTGAACAAAA[T/C]GATACTCTACCAAGATAAATTGCATCTAAGGGCCATTATGGAGTCAATAACTCCAACATTCCACCATGTGC	scaffold7638:23745	28282
SLG-1	DAFWA6953	0	33	AATTCAGTGTAACCTGACTGCTAACGAGGAAA[C/T]GTTCACGACAGACCGAGTAAAGATCATTGGTTTCCATTCCTGAAAAATAAAGGAAGATA	scaffold99292:1320	6464
SLG-1	DAFWA8278	0	9	AATTCATC[A/G]ATTCTAAGTGTTGAAGTGAGGATGTTCTTTGCTTTGAGATCGTATTGCACATTCTTTTTGTCATCATCATTCCATGAATATTT	scaffold1030:21907	37204
SLG-1	DAFWA6453	0	8	AATTCTT[A/G]CAATCCAATAACTCTTTATATACTTTAGTACTAATTCTCATAAAGTTTGACTAACTTTGAAACAACACTTAAGGCAACTTCGGA
SLG-1	DAFWA916	0	71	AATTCTAAACTAAAATTATAAACTTACTTGAAATAAAGCTCTAAAAATTAAGAAAACGAAGAGAGAACTT[T/C]AGAGAAGAATTTCTAGTGAGA
SLG-1	DAFWA6374	0	71	AATTCATTAGCTCTAAATAATATATTTAATTTAGATAGATTGTGGATTATGGATAATTTATCACATCTAC[A/G]ATGATACATAAAAATGAGTTG	scaffold74082:2093	3011
SLG-1	DAFWA6904	0	63	AATTCAAAAAGTGAATAAATTCAATTATTATTGTTCAATAACATCTAGTTTTTTATCAATCA[A/T]TAACTATATATGGATGGGTTTTAATGTTA	scaffold33542:10952	22494
SLG-1	DAFWA5486	0	88	AATTCTTATGTGGATATTGCCTTATGGACAACTCCTTATCCATCCACCTTTATTCTCCTCAGTTAGTCAACAAAACTTGTTGCTCTA[C/T]AAAT	scaffold39705:2777	4156
SLG-1	DAFWA7961	0	61	AATTCACTTTGTACTCTTGCTTCCATGATACTACTGCAGATATTGTCATAAGAGTAACAA[C/T]GGGGTAAGTTCATTTCACCTATAAAAAGAGC	scaffold22735:14132	17356
SLG-1	DAFWA2216	0	66	AATTCTTTAGAGTATCAAACTGCGAATCTGCTAAAAAAATGTGGGATACTCTAGAGACTACACAC[G/A]AAGGAACTAAGGAGGTTAAAAGGTCG	scaffold29835:9154	12530
SLG-1	DAFWA3112	0	31	AATTCTCACTGATGCCGAGGATATTGGTAA[T/C]CATGTATTGAGCTATTATCAGGACTTATTTGCAACTGAAAATGTCACAACCAATTGACCTT	scaffold21391:9003	19109
SLG-1	DAFWA1316	0	91	AATTCGAACACTTGCGTTACCAAGTGAAACAGATACACTTGGATTTTCTTTTCATTTTCTTATCCTTCACCTTCTTTATTATTCTTATTT[T/C]A	scaffold29760:807	26159
SLG-1	DAFWA5485	0	61	AATTCAAATAATTTTGTTACTCGTCTTTTCTAGCCTAAGTGTTCCCTATATGTAACCGTG[G/A]TGATGAATGAATAAAACTAAGTTGAATTTAT	scaffold31879:9845	13036
SLG-1	DAFWA5771	0	44	AATTCAAAGAAAGACACTTCTAAAATATTCCAAGCAGACATTA[C/T]GTTTAAAATGAAGGCATCAAGCATAAAAAGGGTGGCCCATTGCACGAG	scaffold178:23588	39720
SLG-1	DAFWA2712	0	35	AATTCTATAAAGTGCCTCTAAGCAATACGTGTGT[A/G]TCGTAGGAGATTCATCTCATATAATTAACTTTTTTTGTTTCAAAAATTCAGCAAGTT	scaffold80778:5311	8255
SLG-1	DAFWA876	0	73	AATTCTACTGATTATTTTATATTTGTTTACATATTCCAACAACTTAAGCAACTCAAGCCAAAATCACATTCA[G/A]TGGTGTAACTTTATTTCCG	scaffold38889:4597	32582
SLG-1	DAFWA322	0	13	AATTCAAAGGAT[A/T]ACTTCACGCAGTGTAAGATTTTGAACAAAGATTTTGAACATTGAAACATAGGATAAATGGTCGTATCTTGAGCAATAAA	scaffold2847:532	85678
SLG-1	DAFWA4195	0	90	AATTCCTCAAATTTGGGCAAAATGGATGGACTTATTCATTGTCCTCAAGATGACACTAAGACAATTTTATGAACCACCTTAAAAGAAAG[G/T]TA	scaffold89621:2235	10823
SLG-1	DAFWA7402	0	77	AATTCTGTTTTTCAGTTATCTTTTAAAACTGATTAAAAATGATTTCACGTTAATCGATTAACGCCTTGCTTAATCG[G/A]TTAATTGGCATATTT	scaffold2847:43420	85678
SLG-1	DAFWA4164	0	6	AATTC[A/G]GTTTTGAGAGAGAAGTGGAATGTGAGAATAAGAGAAAGATCAATTAGAATGAATTAGCATCAATTAATTAAGCCGTAAAGTGCCTC
SLG-1	DAFWA6568	0	25	AATTCAAAACAGTGGTTGCAAAAT[C/T]CATCACCACAAACCTACAACAATCAAACTATAGTATAACACGTCTGAGAATAACACCAACTACTCTT	scaffold85540:13008	15075
SLG-1	DAFWA3498	0	86	AATTCATATATCCAATCATTCAACAAAATTAATTATATAACATTTTTTCTTGTTTAAAATTTTTCAGGTTTATCTTTAGGAACTC[G/T]CAATCT	scaffold77466:2717	11196
SLG-1	DAFWA3251	1.252	85	AATTCTAGAATCTTGCGGAAAGAAGAGTTGTCCATTTGTACTTCAAATGTATGGCCTCTGAGATAAAAGTCAAATTTCTGGATC[C/T]CGTACTT	#N/A	#N/A
SLG-1	iDAFWA836	0.192	23	AATTCTTCATGCATAATCACTTACTTTAAAAGACATTATGCATCATAGATCACATGTGGAAACTTCACAACAAAATTTTATTGTAGAGAGAA-AATTCTTCATGCATAATCACTTATCTTCAAAAGACATTATGCATCATAGATCACATGTGGAAACTTCACAACAAAAATTTATTGTAGAGAGA	scaffold35846:3041-T-d1	6303
SLG-1	DAFWA8287	2.123	59	AATTCTTGCTAATTTGAAGAGCACGTGTGGAAGAAATCCATATGGCAACAATCAAGAG[T/C]AATCAAGCAATACCATTTATTCCCTAATCAAGG	scaffold4171:9574	30375
SLG-1	DAFWA2454	0	6	AATTC[G/A]AAAGCATTAATGACAGAAAATAAAAGATTGAAATTTGAACGAATAATCATAAATTTCACAAAATCAATTCCTAAATGATTGTAATA	scaffold23943:9480	17520
SLG-1	DAFWA1345	0	81	AATTCAATAGTGCATTCACCAAAAGTGTTGTTGAATAATTATCTCTCATTTATTCTATTTTAGCTATACAACAGCGCATT[T/C]GGTAAGAAGCA	scaffold19275:19352	26173
SLG-1	DAFWA3977	0	34	AATTCCAGTGCCATTACCCATGTAAATTTGATC[A/G]TGACCAAATGACTCAACTGGTTCATGCACCAAGGAAGCATCAACAGTTAGATGATTTG	scaffold70822:20541	34423
SLG-1	DAFWA654	0	68	AATTCCGAAAATAATAAAATAAAAAACATTTTTTATTACTATTAGTTATTATGATATTCAATTGTGA[C/T]GATATGCTAAAAAATTCCAAAAAA	#N/A	#N/A
SLG-1	DAFWA4331	0	56	AATTCGCTTAGATGGCTTATTATAAATAATATATATAGTCTTATATTAGTGAGGT[A/G]GATCAACTTTCCTATAAGCCTTTTATACATTGTAGA	scaffold62212:1714	10990
SLG-1	DAFWA4344	0	39	AATTCAAAAAATCAAATTAGAGATTGCACTATGAAAAA[T/C]ACAAATCATATCAAATTGATTGCATCCCAATATTAGTAAGGTAAGAATCACAA
SLG-1	DAFWA8038	0	60	AATTCTGAATACTACAATAGTCATGTATTACTTGATGCTATTTTTGTTGCTTAATGTTA[C/G]TTAATGCTATTTTTGTTGTTGTTAGGGTGATA	scaffold9862:34674	42826
SLG-1	DAFWA3179	0	34	AATTCAATCAATGGAAAGATCATTTGATTGAAA[G/A]TAACACATATGTCATGCATATTTCAATGTGTTCCACAATGATCTTCAATTTAAGGCAT	scaffold9502:4375	17496
SLG-1	DAFWA5850	0	17	AATTCTCGAACCACCT[T/C]AGAATCAAACTTATCATGCAGGGATGCTAATGTCCACCACTTCATTTTGTTGAGAGGTTTAGTGAATCCAGGATA	scaffold2142:7125	23199
SLG-1	DAFWA7958	0	7	AATTCA[G/A]CATAGATAAGTATGTCAATGTCATTTGGAGATGGATATTTGTTAGAAGGATGCAAAAAAATAAGCAAGTGCATATATGGTAAACC	scaffold9502:16354	17496
SLG-1	DAFWA1546	0	23	AATTCCATGATAAGGATATTTT[C/T]CAAAGCCTTGTCTGAAGTGACAAATTGTTCGTCTATTGCTTTTATTAAGAGACGAACATTGTCATACTG	scaffold68682:5185	15989
SLG-1	DAFWA3099	0	40	AATTCCAAAGACAATGAATCTTGCCATAAGAGTAGGAAA[A/G]TAGGACGTATGAGGTACCCATGCCCTACACCTTCCAAGAAGATTGAACAAGA	scaffold4171:5148	30375
SLG-1	DAFWA6882	0	7	AATTCA[A/G]TCAACTGTTCTTATTTTTAAGAGATTAATATCTGTGATGTCAATAAAAAAGGGCGGCCCAATGCCGAGGCTCGGACTTAGTGGGG	scaffold70822:4213	34423
SLG-1	DAFWA7413	0	56	AATTCAACTAGTAAATATACACTTGAGATTTCATTGGTCATGTAAGTGGCCTTGA[T/A]ATTAGTTGTTCCTAGTCATTAGTCTAGGAAAGGAGT	scaffold52708:9095	9436
SLG-1	DAFWA5260	0	84	AATTCTTGTTTTTATCCTGAACTTCTCGTTTTGCAATTATTCATCCGGATTAAGCCTACAAAATACTTTAGAGGTAAGACTTG[A/G]TCATTTAA	scaffold19275:25090	26173
SLG-1	DAFWA8536	0	20	AATTCAAGGTTATTGAAAC[T/C]GAACCTGGTGAGTATTGTGTTGTTGCTCCAGATACAGAGATCTTCTGTGAAGGAGAACCTGTTAAAAGGGAA	scaffold29985:3724	5587
SLG-1	DAFWA7392	0	53	AATTCAAGTAATACATCAGAGAAAACAACTTTAGTTTAGGTCATTTGAGTAA[T/C]AGTACTTGATTTCAAATTTACATGAAAGGTTTTCATAAT	scaffold92015:4594	17735
SLG-1	DAFWA8748	0	19	AATTCTTTACACATAATG[G/C]TCATTTCTTTGTTGTCTGCATTTGAAGTGCTTGATGTGAGGATCTATGTTGATCCTCTCATTAAGCCTCTATT	scaffold2887:12667	14583
SLG-1	DAFWA6970	0	62	AATTCGGATCACATTGAAAGGTCTAACATTGCAATAAGAGACAAAGGTTGCAAGTATGATC[T/A]ACTCATATGGTTTTGATGAAGAAAAGGACT	scaffold4171:13655	30375
SLG-1	DAFWA4250	0	32	AATTCTTTCGGGTATCTCAGTGTCAAAGTGC[C/G]AAGGAGATATGGGACACTTTTCAAGTGACTCACGAGGGCACTAGCGAGGTCAAGTGTGCC	scaffold16331:9087	11025
SLG-1	DAFWA4202	0	45	AATTCAAAACCCTATATACATATAATTATGAGAAAAAAATAGTG[G/C]ATGAATTTTATATATTATCACTACATCATCCACTATTCATGTTTAAT	scaffold40549:7742	20949
SLG-1	DAFWA4150	0	88	AATTCTTTCGGATATCTCAGTGTCAAAGTGCCAAGGAGATGTGAGACACTTTACAAGTGACTCACGAGGAGACTAGTGAGGTCAAGC[A/G]CGCC	scaffold14955:3565	6535
SLG-1	DAFWA7277	0	13	AATTCAAATACT[G/T]TTTCCCAAACAAAAAACACCATTATCAGTTGCATTTTGTTCGAAATGGGTGATCGGTGAGAGGAGGAAAACAATAATTG	scaffold60079:620	4461
SLG-1	DAFWA860	0	92	AATTCTCTCCCTGTTATCATTTTATCTTTTCTGTGATTGAGGTTCTTTTACAGTAAGTGTGTGTTTTGAAAACCTCTATCCAGGAAAAAAA[C/A]	scaffold70822:15064	34423
SLG-1	DAFWA7234	0	67	AATTCAGTCGAAGATTGTGTGTATCACAAGTTCAGTGGGAGCAAGTATATTTTATTGCTCTTGTAT[A/G]TGGATGACACACTGCTTGCCACTAA
SLG-1	DAFWA7638	0	20	AATTCATCGTGGGATAGGG[T/C]CGAAGTAATGATGTTTTTGGCGCGAAGGTTGAACTGGACCTTCTTGCGCTCCTCATCGGTCCATAAGCTTTT
SLG-1	DAFWA2390	0	63	AATTCTTTTACATGATATCTAATTCTATCATTTGATATCAGAGCATAATCAATGATTTACTT[A/C]TGCCTTGTTTATAAATTTTATCAGTTTGA	scaffold68682:6444	15989
SLG-1	DAFWA3090	0	30	AATTCTAGAAACCCCCGACCTTTCTTTAT[C/T]TTAACCCAACTGCGAGAATCTTAAGACTACTCTCGTGAATTAGGATTCCAGTTTAAGTAATT	scaffold470:27010	32200
SLG-1	DAFWA4178	0	82	AATTCTAATAGCTTCTATTCAAGCTATAGTTGCAAAAGTTTCAGTAAAATCAATACCTTCTTGTTGATTGTATCCTGAGCT[A/C]TCATAACATT	scaffold68682:8953	15989
SLG-1	DAFWA4944	0	38	AATTCTCTTACCCCATTAATTAAATATAAAAATCTAA[A/G]TAAGAATACGAGTTGATAGGCACTTTTGTGCCTGTCGGCACAGTATTAAGTATA	scaffold24978:51229	53847
SLG-1	DAFWA5123	0	72	AATTCTTTACTTGTTTACATTTTTGACACATGTCACAAGAATCTTGAGTTTTAAAATCAAGTTTTGGCAGA[T/C]CAATAACCAAATTGTTTTTA	scaffold14955:5450	6535
SLG-1	DAFWA6455	0	74	AATTCAACATTTAACTCTAGAACAAAGCATATTAATATAAATTACCACATCACCAGATCCTTCCTTAAAGATG[A/T]GGTACTAATATTGAAAAA	scaffold2329:2638	6462
SLG-1	DAFWA7650	0	85	AATTCTATCAAATGAAAGTAGTCCACCCAACTTCCAGAGTGTTCCAACACACATGCTCTCAGTAGGTCTTCCAAAAATTAAATA[T/G]TCCGTTC
SLG-1	DAFWA6616	0	18	AATTCATAAAAGACTAA[T/C]TAAGACAGATTTAGACAGAATGACATCTGCTATCCTAAAAAGTGTGTTACTCCATGTGGACATCACTTGCGATT	scaffold8131:20516	21312
SLG-1	DAFWA5822	0	39	AATTCTTGATGAAAATTATCCTGATTAAAATTGTCTAA[C/A]AATGTTATTATATGCTTCGCATGATTCTATGCTTCAAAATGTATATTTGTTAT	scaffold4041:4660	21647
SLG-1	DAFWA1297	0	12	AATTCATAAAG[A/T]TAAAGTGTTATGAAGTTTTGGATATTAAAGTAGTAGAAAGTCTTACCTTAGAATTTATTTTGATGACTATGAAATTAACA
SLG-1	DAFWA6926	0	55	AATTCGAAGGTCCTTGATGCTGAATTTATTGTCAATAACATCTTTCACACCCTG[C/T]ATTTCATCAATGTTGTCTCCTGTAATCACAAGGTCAT	scaffold5385:4354	10824
SLG-1	DAFWA5009	0	61	AATTCAAAGACTTGTGTCAGATGAAATTCTTAACCCTTTAGATTTATCAGACTTTGAGGT[C/T]TGTGTTGAGTGCATGAAGGGAAAACAGACAA
SLG-1	DAFWA4626	0	61	AATTCGAAAATCATAAATTTAATAAAATCTATGATAAATATGGTATTTTGCATCAGTTCT[C/A]AGCACCTCATACCCCTCAACAAAATGGAGTT
SLG-1	DAFWA792	0	57	AATTCTTAGCATAATTTTAGTTAAGGTATTTATTTGCTTAAGTTTAATAAATGAGA[A/T]TTTATTCTCATGTAGTCTTAGGATTTAACTTTGTC	scaffold470:28669	32200
SLG-1	DAFWA6676	0	61	AATTCCAAGTTCTCTTCGAAGAACATATAACATATAATGTATCTCTTCAACAAATTCAAG[A/C]ACATAGTCGCCTTTTTGTACATGGTCACGCA
SLG-1	DAFWA3788	0	67	AATTCAGTTATGCATTCTAGAACCAAACACATAGATATAAGACATCACTTCCTTAGGGACCATATC[T/C]AAAAGAAAGATGTGATTGTAGAATT
SLG-1	DAFWA7780	0	35	AATTCAACAGCAAATGATGAAAATTGATGGAAGA[A/C]TTAAAACTTGAGGAGTTAACATCTATCTAAAGACATGTCATGAATCCTGTATTAAGT	scaffold3319:20355	27783
SLG-1	DAFWA6543	0	15	AATTCACAACAATT[A/G]TCTCCGCACCAGATGTGTCGATCTCTAAATGATCAATGACACAAGAGATAAATATTCCATAAGCCAACAACCTCGAA
SLG-1	DAFWA4317	0	81	AATTCCTCCTGTACTACCATGTACCAGGAGCACATCTGCTGTCCCATACTTTGTGTCATTCCATGTACCATGAGCTTATG[G/A]TTGGTCAGAAA	scaffold90312:1115	1526
SLG-1	DAFWA7362	0	23	AATTCTATGCTAATGCCTACCC[C/G]AAGGAGGAGGGCGGTGAACCCTTTGAGCACAAATCATGGGTCAGAGGCAAAACCATCCGATATGATAGG	scaffold2142:7090	23199
SLG-1	DAFWA8585	0	71	AATTCTTTTGGCTGCAATCATATGAGAGTGTGTGTCTTGGATCATTCATGAACCTACTAATCACACCTAC[G/A]CTGAAAGATATTTCTGGTCTA	scaffold73715:11200	16605
SLG-1	DAFWA2601	0	38	AATTCCAGTGTTCTTCCAAATCTTGCTAAATAATAAT[C/G]AATATCATAATTTTCATGTGTTTAAAATGATTTCAGAATTAGTACACACAAACT	scaffold9862:41199	42826
SLG-1	DAFWA1580	0	67	AATTCTACTACTCTATGTGTAGAATTTCTAAGGAAGAAATAGAAATACGTAAGCATCAAAGCTTTG[T/C]GAAAACTGTTAAAAACCGAGATATC
SLG-1	DAFWA5070	0	15	AATTCTGAAAAATA[T/C]TCTGAAATAGAGAAGAGAACCCTCTTCGAAGGGAAAACCCTTACAACTCAATATTTCATACTTCAAAACATAATCTT	scaffold70822:24697	34423
SLG-1	DAFWA7160	0	20	AATTCAGTATGCTTATTGA[A/G]GGATGATGTAGTTTAAAATGCCACAAGTCAAAGAAAGGTACAGTGTTCAAGGCATTTACATTGTGTGTTATA	scaffold16331:838	11025
SLG-1	DAFWA6248	0	41	AATTCACTCAGCATGTCACCCTCCAAGCTTAAATATCATT[G/T]AATATTTTATTCTCCTAAAGAGAGCCTTCTCCGACTCGAACCGACGACCTT	scaffold3068:11587	22903
SLG-1	DAFWA8691	0	40	AATTCTATGCTAATTTTCAGTACAAGGATGGTGGATATC[G/A]GAGTATAGAACAAAGAAAGCTGATTCTATTAAATGATGTGTTTTTTACGGCT	scaffold4041:17042	21647
SLG-1	DAFWA7606	0	64	AATTCATTTCAGACCGACCTGACATTGATTGCAAGATCCTCCGATCATCCTTCTTACCCCGAT[A/T]GTAGAATGCAAAGCACTTCATTGCAACC	scaffold27978:3694	8534
SLG-1	DAFWA7909	0	71	AATTCTTGAAAGCCAACAAAGATCTTTTTGCCTGGTCCGCTGCAGATATGCCAGGAATTAACCACTCAGT[T/C]GCTTGTCACCAACTCACAGCA	scaffold79701:3876	16550
SLG-1	DAFWA2432	0	17	AATTCCCTTAAAGGGT[G/A]ATTATAGAAGTAAAAGATAAGATATGACACTTTAAATGACATGTGGTTTTTAATTTTGGGGAACAAGAGTCATGT	scaffold7051:38517	76121
SLG-1	DAFWA5667	0	70	AATTCAACATATGCTTCATACCTTTCTCATTGGTGTTGTTATTTGCAGTGTGTAGTGAATTGATTAGTG[T/C]TATGAGTAGTGTTAGGCTGTAG	scaffold8131:1977	21312
SLG-1	DAFWA7929	0	8	AATTCAT[A/G]TTATGGTTAAGTGTGAGGATTATGGGAAGAGGGGAGGGGTATTTATAGTCAACCGAAGTCGTGTATGGGGTCCACAACTTTAGT	scaffold24978:24114	53847
SLG-1	iDAFWA507	0.718	43	AATTCATAGATGGTTCCATCATGATGCCATCCAAGACAGATCATCGTACATGGGAGAGAGCAAACAATATTTTCACATCATGGATAACAAGA-AATTCATAGATGGTTCCATCATGATGCCATCCAAGACAGATCACTTATATCGTGCATGGGAGAGAGCAAACAATATTTTCACATCATGGATA	scaffold11451:34482-CTTATA-d6	47379
SLG-1	iDAFWA354	0.718	20	AATTCAACAAATTAGTAAGTGTATTGACATCAGGTTTAAATGGAAGACACCCTTTATAGTCGAAACTTTTATAAATAGTAAGTATAAGCAAA-AATTCAACAAATTAGTAAGTTATTGACATCAGGTTTAAATGGAAGACACCCTTTATAGTCGAAACTTTTATAAATAGTAAGTATAAGCAAAA	scaffold86154:7146-G-i1	18991
SLG-1	DAFWA5483	0	13	AATTCTGTCATT[G/A]GGCGAATATGCCTTATTATGGAGCTTTGAATGTTTTAGTTCTTTCATATGTGAAATTACTCAATTTGAAGGAGGCTGCA	scaffold57475:17010	21930
SLG-1	DAFWA7407	0	56	AATTCATCTTATAAGAACTCTGTTTGAAACATAGCAAGCTATCCTAACTGCATCA[A/G]CCCAAAAATATTTTGGGAGATTAGTTTCATTCAACA	scaffold2815:4000	11122
SLG-1	DAFWA4334	0	12	AATTCCACACT[G/A]TTTCTAGAACTATGTGATGGCACATGCTATTTACCTAATCAATAGGCAACCAAGTAGATACCTATCAAATAAAAGTCCCC	scaffold57475:10937	21930
SLG-1	DAFWA2855	0	59	AATTCTAATGGTTGTCATTTTTACAACAGGGCTAAAAGTTTCAAAATAATCAAGACCA[T/G]AAGTTTGCTTATACCCTTTTGCAACTAATCTAG	scaffold6152:2074	15749
SLG-1	DAFWA4723	0	70	AATTCTTTAGAGTCTCGCAGTGCCTTAATGCAAAAGAAATATGGGATACTTTGCAAGTTACCCATGAAG[G/A]CACGAGTAAAGTTAAGCATGCT	scaffold6152:10540	15749
SLG-1	DAFWA5198	0	58	AATTCAAATTTGAAACGCTTGCTCTTCCCCTTAGGTAAGCAATGATTACTACGAAAG[T/C]TATTTTACAACCTGCAAATACATCAAACACAACA	scaffold6152:12816	15749
SLG-1	DAFWA7933	0	27	AATTCCCTAAGAAAATACAAAAACCA[G/T]TAGTGGATCTTCTAGTGTCAAGGCAGGAGGCCCAATCACTATCACTGTATGCATTAAGGTGAAGG	scaffold18131:662	6829
SLG-1	DAFWA5966	0	75	AATTCTAGATTGGAAAATCAGGGACCTTGCAACATCAAGTATGTGTTGATGTTTTCTTTCAACCACCCCATTTT[G/A]TTGGGGTGTTTCAACAC	scaffold57475:11019	21930
SLG-1	DAFWA5466	0	22	AATTCAGTTACTAACTGATAT[A/G]ATATTGTTAGCACATTAATCGATTAAAACACCATATAATCGATTAAGACGTAACTGAAAACTGATTTTTA	scaffold17092:20394	35206
SLG-1	DAFWA8613	0	13	AATTCAAGTTTA[T/C]GCTTGTTGTAAGGTTTAAGTAAAGGAAAACAAGCACAACCAAACATTAGGGTGACCTAGTGCACAAAACTCCCACTTAG	scaffold76810:1674	9833
SLG-1	DAFWA2884	0	39	AATTCTAGAGGAAGAGAAGACAAATATGTGAAGAAGTA[A/G]TGACAGAAGCAAAAAGCCTACAATGACAACTAACAATGGATTTTCCATGACCT	scaffold17092:1800	35206
SLG-1	DAFWA3964	0	85	AATTCTATGATGATCTTGACATCAATCACAATTTTTCTGCTCCTAGAACACCACAACAAAATGGTGTTGAAGAGAGAAAGAATC[A/G]GTCTTTA	scaffold6229:8886	10450
SLG-1	DAFWA7367	0	77	AATTCAGCCCACTCATGATTTGTGGTGCTCATATCCCAAGCCAGCTTTGTCAAGGAGGCCATGTTCATAAGCTTCA[T/C]AGATTGAATGCCAAG	scaffold1837:12370	13031
SLG-1	DAFWA1503	0	71	AATTCTAGCAATTAAATTCAACTAAAAATATACAGTACTAAATAATATTATCATAGAACCATAATAAGTA[C/G]CCAACAATAATCAAAGGGAAG	scaffold87679:2299	6598
SLG-1	DAFWA6815	0	21	AATTCAGCAACAACAAAACA[A/G]AAGGAAAAAAGTGTCCAACAATAATAAAACAATAGCATAAAACAATGGCCAGCAAGACAACAATAACACCA	scaffold93632:563	13957
SLG-1	DAFWA4340	0	47	AATTCAATACATTCAAGTTATTACTTTTGGTTAAGTTTCAATTCTT[T/A]AAGAAATTCTTAATGCAGTTTTAGCTTGATCACCTAAAACTTGAT
SLG-1	DAFWA2048	0	72	AATTCAAGTTCAAAAGATTCATATGATGAGAAATTCATGGAAGAGAGTTGTTGGTCGTGAGGTTTATCTCA[A/T]ATTAAGGAGTATGAACTCAA	scaffold93632:12537	13957
SLG-1	DAFWA2880	0	45	AATTCTTTCTAATAATTCCTCTGCCTTGAGTTGTATTTCTGCCA[G/A]ATGATCCATTTCTTTTCCACTTGGTGCTTATATTGAGAGTCTTGACT	scaffold2105:9164	27097
SLG-1	DAFWA8268	0	13	AATTCTGCACCA[C/T]TGGATAACCAACTGGCACCACAGTTTGAGCATTTAATTTCCTTAGGCAACACCCAATCCATTTCCCCACACAACCCTTC	scaffold15088:1972	8553
SLG-1	DAFWA7144	0	84	AATTCCTTAAGGACTATGACTTTGATCTCCAGTACCACCCTGGGAAAGCTAATGTGGTGGCTAATGCCTTGAGTAGAAAGTCC[A/C]TGCATATG
SLG-1	DAFWA1955	0	41	AATTCAGATTCTATTCATGTTTCTAGAAATATGACTAAGG[T/C]TGATGTCATGAGAATCTACATGATAGAAAAGGATATGCTTAAAAAAGAGAT	scaffold15703:13365	18642
SLG-1	DAFWA8145	0	79	AATTCAAGATATGTACATTTTCTTTCTCCCATTAGACTGGTGTATGTGCTAATAAAAGTTTGTTTATGAGTTGTTTTT[T/G]AAAGAAAAATAGG	scaffold93083:458	6270
SLG-1	DAFWA5558	0	67	AATTCACTCTGATTTTTGCTGAAAATATTTTCAAACAATGGAATACTATTCCATTCCACATTAACT[C/A]AAGCAGAACATTTCTATATAAGGTT	scaffold57475:14849	21930
SLG-1	DAFWA8144	0	87	AATTCAACTAATGATCCGCTTTTTAATAAGTTAGAACAACATCAAGATTATATACCACAAGATTAACATGGAGATGGTGATATCAA[T/C]TATGT	scaffold95827:2618	8926
SLG-1	DAFWA1211	0	32	AATTCACACAGAATCTACCCCCTTGTTGCTT[A/C]TGTTTCAGGCCCCTTCCTTCAAGTCTTTTGATTCATCCAGGATCTTGCACAAAGCTCTTG	scaffold17092:1734	35206
SLG-1	DAFWA6330	0	91	AATTCCAATCTCACTTTGCCTTTGTTGACTTTGTCTCTTATGTAGTGGAACCTAGTCTCAATGTGTTTACTTCTTTCATTGGCAATAGGG[A/T]T	scaffold17092:5672	35206
SLG-1	DAFWA6313	0	19	AATTCGATAATTGACGTG[A/G]ATAGCAGTATAGTGTAGTGCGAGTTATATTGTGGGTGTATTCGAGAGCGATTCCCATAGTGTAGTAAGAAATC	scaffold17092:31012	35206
SLG-1	DAFWA5977	0	49	AATTCAATTCCTAACTTCATTCTTCATGATTGTAATAGGAATCGGTTG[A/G]GGCCCAACTACAGATTTAGAAATGTTTGACTTTGTTTTCTAGT
SLG-1	DAFWA1019	0	84	AATTCCCATAATCCATACTGCTAGAACTTATCTACATTTGATAAGGTTGTTGCAAAATTGAATTTGAGTTCATACTCCTTAAT[T/A]TGAGATAA	scaffold93632:12537	13957
SLG-1	DAFWA3115	0	79	AATTCAATCTCATATTAGTGATAACAAGTGTCTTAAAGCAACATCAGATCAAAATTCTTGGTTGTGGAATCAAAGGCC[C/T]GAGCATATAAACT	scaffold17092:3274	35206
SLG-1	iDAFWA589	3.773	63	AATTCAAATGCAAAAAGGAAAATACATAAGTAAATACGAAAACAAATACAAAATTGGAAGTAAGCATGAAAATAGAACTAGGGTCTAAATCC-AATTCAAATGCAAAAAGGAAAATACATAAGTAAATACGAAAACAAATACAAAATTGGAAGTAATGCAAGAAAATAGAACTAGGGTCTAAATC	scaffold23420:8556-T-d1	14268
SLG-1	DAFWA1371	0.717	89	AATTCAAGCTAGTGTTGAGAGGGCAAAGTAAATATTTTATTGAAGAGGAAAAAATATATGCACTTACGATGTACGGATGTTGTACACA[G/A]TTG	scaffold17253:18962	19532
SLG-1	DAFWA5978	0.718	45	AATTCAAAGTTGAAGCACTTTTCTCTCCCCCTTAGGTAAGCAAT[G/A]ATTAATAATACGGAAGCTATTATGACAACCTGCAAATAACATCAAAC	scaffold18469:4026	5781
SLG-1	DAFWA7743	0	28	AATTCAAGTCGCTTCTTAAAAAAATGA[T/C]GGACTTGAAACTGATTATCATAGGCGGAAGGTCCTCATGCTATGGGATTAATGTCGTAGACAAG	scaffold2512:9293	13864
SLG-1	DAFWA360	0	47	AATTCAAAGTTAAATAAACATGATTACTTGTGAAAGAGTCATGTGT[G/A]CTTATACCTTTTCATTAACTCATCCTAAGGTTGAAGTATGTTAAT	#N/A	#N/A
SLG-1	DAFWA8601	0.609	65	AATTCACCACCATGGTCGGATCGAATGTAAATAATCTTTAGGTTAGACTGGTTTTGAATTTTCT[A/G]GGCTAGACATTTAAAATATTTGTAGGC	#N/A	#N/A
SLG-1	iDAFWA544	0.479	57	AATTCCGAAACAAAAGTAATTAAGAGGAGAAATTAATAAATAAATAAAATAGGGGTTAGAGAAAACAGATAAATAGGTAAAGTTGGCGGGTA-AATTCAGAAACAAAAGTAATTAAGAGGAGAAATTAATAAATAAATAAAATAGGGGTTGAGAAAACAGATAAATAGGTAAAGTTGGCGGGTAG	scaffold41737:4172-A-i1	4864
SLG-1	DAFWA8801	1.069	59	AATTCCACTTCGACCCCAAATTCTACAACTTAGTTCAGGTACAAAAATCTGACTATGA[T/G]CATTGCACAACACTTAAGCCTCAACTAGTATTC	scaffold20072:32618	33789
SLG-1	DAFWA6530	0	23	AATTCTTGTAAAGATACAATTT[C/T]CGAGACCCCACCTATATAAAATTTATATTAGTTATGATAGGAAAAATAAAGAAATTACTTGTAAATAAA	scaffold56482:7662	17446
SLG-1	DAFWA1226	0	69	AATTCACAAAAAAATACTAACACTCAACTATGGTTTAGCCTAAATCAATACCCATTAATTTCTAAAAT[T/A]AATTGTTGGTAAAATAAATAATT	scaffold7621:8202	15992
SLG-1	DAFWA6451	0	20	AATTCGACTCTGCTTCAGT[G/T]ATGAACTGCCTTATAGTATCCTTTTGTTGATGTCATAATGTTATTATTATATACTTTCCAGCGTGTTGAGTT	scaffold66466:18612	19318
SLG-1	DAFWA7861	0	78	AATTCGTCATAAGATAAAGTTGAAGTAATAATGTTCTTGGCCTTAAGGTCATGTTAGACCTTTCTTTTCTCAATATC[C/T]GTCCATAACCCTTT	scaffold22697:2809	4480
SLG-1	DAFWA1712	0	56	AATTCTTGGAGTTGGTATTATTGGAAAGCCACCATCAACAACTATAGAAGGTGTA[C/T]TATATGTTGAAGGACTTAAACATAACCTTCTAAGCA
SLG-1	DAFWA7895	0	41	AATTCAATCCATCGTCTCTGCCTCATGTTTAGCTCCTTTT[G/T]GTCGAACAAATACTTCAAGTTATTGTGATTACTAAAGACTTCAAATCTTAC	scaffold4130:8009	9840
SLG-1	DAFWA5905	0	59	AATTCTCATTTTTCAAGTCCTCGCAAGACTCACAGATAGTTGTTTGACATAATTTATC[G/A]TTAGAGCAGTCGCATGAATTACAAGAAAAAACT
SLG-1	DAFWA7764	0	73	AATTCAACCATCTTATGACACAAGCGTTTATCTCATATATTTAAACAAAGAATACAAAGACTTGTGTTAGAC[G/A]AAATTCTTACCCTTTAGAT	scaffold8564:2919	4290
SLG-1	DAFWA2805	0	86	AATTCCTTGATGAATTTGAGGTACAAGGGGGAGCTTCTATTTCAGATCACTTGAATGATTTCAAGGGGTCTTTGATCAATTATTA[T/G]GAATGG
SLG-1	DAFWA1911	0	71	AATTCCTTAAGGACTATGACTTTGATCTCCAGTACCACCCTAGGAAAGCTAATGTGGTGGCTAATGCCGT[T/G]AGTAGAAACTGCATATGTCAA
SLG-1	DAFWA1599	0	22	AATTCTATATTCTTTTCTTAG[T/C]AGCAAGATCCTTTAAATATATTTTGAGTTCAAAATGATTTTTGCAAAAGAGTTCATCCATATTACCACTG	scaffold56482:14257	17446
SLG-1	DAFWA7030	0	36	AATTCTTCCCAAGATGAATGGCACTTTGACTATCA[A/C]AAAATAACAAGTATTTGTCTTGGACAAAATCAAGCTCATGCAAGTATTTCTTCACC	scaffold15523:5407	14122
SLG-1	DAFWA4655	0	7	AATTCA[A/G]TAACGATTGCTTGACATGTCAATTAAGGATGTCATGTAATTACTCAATAGATTAATCATTAACTATTGTAATTTGGTCCATATTG	scaffold97121:1848	2535
SLG-1	DAFWA3706	0	40	AATTCTATTCCATCATCGTTCCTACTTTAGTAGGGTCTA[G/C]AACAATTCCTTCGCTTGATATCACATGCCCGAGAAAATTCACTGATTCTAAC	scaffold7621:10882	15992
SLG-1	DAFWA4198	0	26	AATTCTTCCAAGCCCCTATACTGAG[T/C]TGGTCCTTGAGTTGGTTGGGGTTGTTGTTGTTGATTCAGCTGATGGAAATTTGCGTTCACGTTCTG	scaffold7621:12953	15992
SLG-1	DAFWA2594	0	12	AATTCCTATTT[T/G]GTGGTAAATTTTTGTAATTTTATGTGACGAAAAGTTTTTGAGTTGTTGTCGGACCCAAATTTGCCCGAATTCAGCCCAAT	scaffold7621:8126	15992
SLG-1	DAFWA744	0	14	AATTCATGTCTAG[G/T]ATGTTCAAAGTGGATATATTTATTATGGTGATGAAACTACAAAAGATTAAACCATGGAAGTGGAACGCACATTAGTAA	scaffold20072:31149	33789
SLG-1	DAFWA7908	0	73	AATTCAATTCCGAGTTACAGAACTCAAAAAGACGTTATTGTGCCGAATTCGGACGAATTTGGGCCCAGCAGC[G/A]GCTCAAAAACTTTCTGTCT	scaffold34669:2719	3770
SLG-1	DAFWA6327	0	13	AATTCAGATCCG[G/A]TTCCTTTTAGAAAATTAGTTATAGGTTAGAAAAAAGTAGATTTGGTAAATATGAAGTATACGATAATTTAGTTTCTCAG	scaffold51572:14620	33043
SLG-1	DAFWA8218	0	74	AATTCATATTCTCAACAGAAAACAAGTCTGGCTGTCTTGGAAGATAATTTCTTGCAGAATTGTTCTGTATTCT[C/T]GGCACAGATTTGTTGTAT	scaffold47509:8381	9466
SLG-1	DAFWA2886	0	18	AATTCACAACCATTATG[A/C]AAATGTACAACATCATCAAGCTAATTCATTAAATATAACGTATTATTTGATGTGGTGTTTGTCATCATCAAAAC
SLG-1	DAFWA5155	0	80	AATTCAGGAAGCCTATTTGACCCGAATCTACTCGCGGCTTTCGAGCCGGGAAGGAACATGTTAGAATGACAGAGGAACT[G/T]AGAAGAGCCAGA	scaffold20072:29522	33789
SLG-1	DAFWA1219	0	43	AATTCTTCAGGTGAAACTTCAGATGGCTATGTTAATTTTCTC[A/C]AAAAGATTCCAACTTTGAATATTCAGAACCCCTTTGTTTCCCGAGAAAA	scaffold20072:29049	33789
SLG-1	iDAFWA340	0	67	AATTCAATCCAATTACTAATAATGAGCTATTGAAAGAGTTTTCTGATGCTTTCTTTATTTTGATGTACAAGTTTCTGATTTATTTATTTAAT-AATTCAATCCAATTACTAATAATGAGCTATTGAAAGAGTTTTCTGATGCTTTCTTTATTTTGATGTAGCAAGTTTCTGATTTATTTATTTAA	scaffold60789:98-G-d1	5208
SLG-1	DAFWA7897	0.717	72	AATTCCAAACATGGTAAAGATAGACTTACACATTGCCCATGCTTCAAGCCTAAGGGTTCTTGTGTGAGGAA[G/A]TGTATTAGAGATAATAATAA	scaffold64784:19351	24128
SLG-1	DAFWA5076	0	33	AATTCAAGGGACTCGTCTCACCTAGACTCGCC[C/T]TCAAAACTTTGTTGAAGAATCACCGCCATTGATGTCCCTTTCAACATCGCTGGGCTCAT	scaffold17405:7599	16240
SLG-1	DAFWA5825	0	32	AATTCAACAACCATGTAATGTAATCAATAAT[A/T]ATTATTTTTTCCTCATAGTCCTCCCACTCAATAAATTTTACATTAAACTAATACAGTATA	scaffold87372:386	17113
SLG-1	DAFWA5210	0	48	AATTCTGATCAGGTCAAATATTTAAAGATCGATGATGAAGATCCCGG[C/A]AAAATTCACACAAATAAAGGAAAGTACATAAGCCTAAAGATTAC	scaffold64784:21061	24128
SLG-1	DAFWA6724	0	91	AATTCAAAGTGAAAAATATATAGAAATGCATCATGAACAAAATTGATGTCTATTTTGACTCGAAATAATATTTCAAAGCCAATGGGATAA[C/T]C	scaffold9418:16626	29107
SLG-1	DAFWA7147	0	39	AATTCAATGTTGACTCTTTTTGTGAAAAGGTGTTATAA[G/T]ACTCATTTTGGTATGATTTAAGGCATAGTCTAGAAGAAGAGAGAAAAAAAGTG	scaffold41737:4081	4864
SLG-1	DAFWA609	0	40	AATTCATGTTAGAACTAAAATTTTCGAAATATACATTTT[T/G]GTTGATAATTGAAAATTTTAAAAAATATTAAAATAGAATCAAAATGAAACAG	scaffold36407:9991	10680
SLG-1	DAFWA3965	0	84	AATTCAAAGACAAAAAAGTGTAGTAAAAGAGCAAGTAACATTTTGAACACCTTGGGAAGTCTACACATATATTTTGAACATTT[T/A]CAAACAAG	scaffold48845:17303	19467
SLG-1	DAFWA2795	0	21	AATTCCTATTTTTTTGGTAA[T/A]GTTTCGAAATTGTCTGTGACGGAAAGGTGTTAGACTGCTGTTGGACCCAAATTTGCCTGAATTCGGCCCAA	scaffold9418:16514	29107
SLG-1	DAFWA7800	0	50	AATTCCACTTCCTTCCTCGTCTTCATATCAATAGGGAAATACTTCTACA[A/G]AAACTTGTCCTTGAATGTGGTCCAAGTGACCACCTAGTGCTC
SLG-1	DAFWA4244	0	14	AATTCTAGGAAAA[G/A]TAAAGAAATGAAATGATAAACTTGCGATATGTGCTAGAGCCTAAATGTATCTGAAAGAATGAAACATGTAGATTTAAT	scaffold54346:6310	12939
SLG-1	DAFWA3448	0	67	AATTCTAGGAAACGTAAAGAAATGATAAACTTGCATATCTGCTAGAGCCTAAATTTATTAAGAACA[A/G]AATATCAAGATGGAGATGGATAGAA	scaffold94088:5950	8837
SLG-1	DAFWA7569	0	63	AATTCTTTAAATCATTGCAGCTACCGGTCCACCTTGAAGCAACTTTTCCAAGAATTTGAAGG[C/T]ACAGAGGATTCTCCACAGCTAGCGTCTCT	scaffold64784:21167	24128
SLG-1	DAFWA6119	0	74	AATTCTTAAGCTGTATGACCTAGGATAGATTAAAATATAAAGTATTGTAGTAGTTATCCATGAAGGAACACCA[C/T]TCGAGAAACTAAAACGCG	scaffold9418:17585	29107
SLG-1	DAFWA6884	0	85	AATTCTACCGGAATGAATGATTTCATGTTGTTGTGCTTCTCTAGAACTTCGGATATGAGAACAATCAGTGTGAAATAACCTATA[T/G]AGGGTGG	scaffold17405:4738	16240
SLG-1	DAFWA3074	0	16	AATTCCTTAGGATTG[T/A]ATGTCAGAACGAGTACAAACTTGAGCATATATTAGACTTCCTACTGCAGATGTATAATGAATCTTTTGCATCTCAT	scaffold7645:12082	18209
SLG-1	DAFWA8086	0	17	AATTCAACAAAGAACA[T/C]GATAATATTATTACTTTGACCTCATCACCAACCTTCACATCAAGTTTTTGTAAGTTATTGATGACTTGATTAAAA	scaffold36060:4032	5485
SLG-1	DAFWA6061	0	50	AATTCTCAAGCGTAGATGAAGTCAAGCGAAGGATCTGATGCAAAAAAAG[A/G]TGTACTAAGCGCATGAGCCAAAGTTCAAAAGTATAAAAACAT	scaffold5768:7981	22353
SLG-1	DAFWA5989	0	63	AATTCAAAGACAAAAAAGTGCAGTAATATAGCAAGTAACATTTTGAACACCTTGGGAAGTCT[A/G]CACATACATTTTGAACATTTGCAAACAAG	scaffold54346:2163	12939
SLG-1	DAFWA7197	0	15	AATTCAATATCCTT[A/G]TAAAATTAGTAACTCTTCAATCAAATGATTCTAAATAATGGTATCAGAGTTTAAGTTGCTAGATGATTCACAATATT	scaffold32509:9887	12645
SLG-1	DAFWA2771	0	37	AATTCACCCGACCCGAGAGTATAGTACCCATTTTGG[A/G]AACGTTAGGTGTCAAAGCCAGTTATTGAATAGGTAAGTCGTCAATCTCTAAAACG	scaffold87372:9110	17113
SLG-1	DAFWA1557	0	19	AATTCAATTTTTTCAAGA[A/C]AAACATCAACAAGATGGTTCACTAAAGATCTGGCAAGTTCAAAAACAACATATTTGTAAAGATCCAGGCATGC	scaffold64784:20764	24128
SLG-1	iDAFWA134	0	44	AATTCAAGAGTATTATATTGTCTATATCAAATTGAAAATTAGTACATTATTGTTACTGATCAATAAAAAAATTATAAAAAAGAGGGTTTATC-AATTCAAGAGTATTATATTGTCTATATCAAATTGAAAATTAGTAGCATTATTGTTACTGATCAATAAAAAAATTATAAAAAAGAGGGTTTAT	scaffold16392:1380-G-d1	9376
SLG-1	iDAFWA176	0	17	AATTCATAACTTTTTTTTAGTAGAATCCATCTAGTGACATAATCTACTTTGGAGCCTATATTTATAATTACATCCGAGTAAGCTACATACCT-AATTCATAACTTTTTTTAGTAGAATCCATCTAGTGACATAATCTACTTTGGAGCCTATATTTATAATTACATCCGAGTAAGCTACATACCTA	scaffold17405:15664-T-i1	16240
SLG-1	DAFWA5319	4.08	16	AATTCTACAACTTAT[G/A]GGGAGCCTTCTGGAACAGCACCTCAGGACTCTGCTTTTGGTTTAGCTCAGATGGAAGCTGTGGAGCAACGGCTTAA	#N/A	#N/A
SLG-1	DAFWA3742	1.949	12	AATTCGTGATT[A/G]AGTCTATCTCCTTCATGATGCTCCAAGGATATGTCAATGCATTGAGAAACATGGACCAAGTTAAGCTCATGCTGATGCAT	scaffold93083:3363	6270
SLG-1	DAFWA2981	0	72	AATTCAAATGTCAGCTATTATGGGTTTCCAAGAAGTGAGTGAAATTGTGGAAGATGGACTTCCAGTTTTGG[C/T]AGATCTGACCATAGAAGCAC	scaffold5230:5669	11017
SLG-1	DAFWA6829	0	47	AATTCATTTAATAAAAAGAATGTGATATCCACTACTAGACCATTGA[C/A]GAATATACCATGCAAGTAGAAGAGTCTATTCATGTCCATTTTGAC
SLG-1	DAFWA3740	0	10	AATTCTCCT[A/G]TTCAAGATGGATGGATCGCTTTCGACTTTTTGAGTATGACTATTTAGAGTTGTAACTAAGGGTGATAAATTGATGGATTTGA	scaffold44475:3389	14314
SLG-1	DAFWA8800	0	26	AATTCATACATATTCTTGTTAATTT[G/A]TGAGATTTGTATAGGGTTTATAGTTGGATTTTAATTGTAATATTTGAGCCACATTGTGCTTTATAA
SLG-1	DAFWA5451	0	75	AATTCGAACAATCAGTAAGGAACAAACCATATCATAAACATGATAAAAATGAATGGCCATATGAAATGTCAACG[G/A]GCGAACATTGGCATGTG	scaffold44475:3928	14314
SLG-1	iDAFWA65	0.841	19	AATTCCCATCTATTGGTCCCATTCATTTGACTTTATATAGATTATGGATGGGGATCACCTGTCCTATTGGGTGTCCCCGTCCAATCGGAAAA-AATTCCCATCTATTGGTCCATTCATTTGACTTTATATAGATTATGGATGGGGATCACCTGTCCTATTGGGTGTCCCCGTCCAATCGGAAAAT	scaffold7662:106-C-i1	25195
SLG-1	iDAFWA425	0.595	32	AATTCTTGTGTATTTGTTATTACTAAATGAATAGTATACATCAGTATTTATATGCAATACTGATTTCCTTGGCTAACAAGAAAAGTGATTAA-AATTCTTGTGTATTTGTTATTACTAAATGAATCAGTATTTATATGCAATACTGATTTCCTTGGCTAACAAGAAAAGTGATTAACAAACTACA	scaffold17003:22662-AGTATACAT-i9	27136
SLG-1	DAFWA5776	0	16	AATTCAGATTGAGAA[C/T]TATATATCCCTTAACCCCTTCTTGAAAACCTATGAAGACACACTTAGATGATCTAGGATCGAATTTGTCTCTAAGG	scaffold17003:9808	27136
SLG-1	iDAFWA593	0	65	AATTCTGAAGTTGTCAAGCAGATATGTTAACCATTGAATTTCACAAGATGTTGCTGCTAGTGCCTGTACTCTGCTTCTAAGGAAGATCGTGC-AATTCTGAAGTTGTCAAGCATATATGTTAACCATTGAATTTCACAAGATGTTGCTGCTAGTGCCTTGTACTCTGCTTCTAAGGAAGATCGTG	scaffold11451:16576-T-d1	47379
SLG-1	DAFWA864	0	8	AATTCTC[T/C]GAAATCTGTAACGGAGATCAGAAACTTCCTCAGTTTAGTAGGATACTATCGGAAGTTCATTGAAGGGTTTTTGAAGTTGGCATT	scaffold21329:1605	4135
SLG-1	iDAFWA638	0	18	AATTCTTCTTCTTCTTCTCACAGAACATAAGAGAGAGAAAAGAGAAGAAGATAGAGAATATGTAGATTTGTGAGTGAATATGAAAATTTGCA-AATTCTTCTTCTTCTTCTTCTCACAGAACATAAGAGAGAGAAAAGAGAAGAAGAGAGAGAATATGTAGATTTGTGAGTGAATATGAAAATTT	scaffold3417:870-TCT-d3	9525
SLG-1	DAFWA2791	0	34	AATTCACCTTTAACTACGGTCATTCAATAGGCA[A/G]AAGAAAATCAGTATCACTCTTTGAAGTAAGTGATCTTAAATGTAATAAGGAGATACAT	scaffold8558:19530	28343
SLG-1	DAFWA4738	0	7	AATTCA[G/A]CCTATTTTGTATAGCTTCAATTGGGCGATGGTTAGATTTCGCCTTGTATTTTATACTAACATTTTACTTGACCAAGCAATACCTC	C28319243:228	370
SLG-1	iDAFWA603	0	63	AATTCGGCTTGCCTTTGAGCCCAATAGGAGAGTAAGTTATTATCCTCCCTTATTATAAAATAGAGTAAATTACATTAATATCGTGGTAACGA-AATTCGGCTTGCCTTTGAGCCCAATAGGAGAGTAAGTTATTATCCTCCCTTATTATAAAATAGTAAATTACATTAATATTGTGGTAACGAAA	scaffold30620:1455-AG-i2	7370
SLG-1	DAFWA5106	0	91	AATTCAACAAATAACATTAATTAATCTATCATTAATGTCTATTTTACATTATTTATTTGGACTTAAGAGAAATAAACTCATAGCTATTAT[G/A]T	scaffold4753:10978	12893
SLG-1	DAFWA8771	0	47	AATTCGATAACAGAGATCTGAGCTGTTTTATCCTAGAGACAACATG[A/G]TTGATAGTTTGCTTGCACATTTTGAGCAGTGCTACGAAACGTCTT	scaffold24559:4492	12035
SLG-1	iDAFWA224	0	36	AATTCAACATAAACAACAACAAATTGGTAAAAAAAACGTTGTTGTATAGGTATACACCAACACATTATTAAAAAAACGATGTTGAATACGAT-AATTCAACATAAACAACAACAAATTGGTAAAAAAAAACGTTGTTGTATAGGTATACACCAACACATTATTAAAAAAACGATGTTGAATACGA	scaffold13117:2675-A-d1	18020
SLG-1	DAFWA5538	0	54	AATTCCTAACTATCAATGAATGGAATGTAGAAAGGTGAAAATAAAAACAACTA[A/G]AAAATACAGTAGAATAGATACCAAAATAGAATCATATA	scaffold22238:12599	17406
SLG-1	DAFWA5962	0	74	AATTCAATTATCTTTTTACATTGAGTAGATTATGTTTACCTTTTTATATTGAGTTTTAATGAAATTACATGAA[C/T]CACTTATCCATTTTTTGC	scaffold73870:4454	10112
SLG-1	DAFWA6526	0	62	AATTCATGGTAAATAAATGGTACTTGCTGAAGATCAACAAACCAATGAAACATCTAATGCT[C/G]AAGAACATAATATGGAACTTAAGCAACCTT	scaffold11451:2409	47379
SLG-1	DAFWA303	0	53	AATTCAAGAAAGAAGTGTCTAGAGTCTTGTAATTGAATTGGTGTATGTAACA[A/G]TACAATGCTTTCATTATAGTGAAGAGAAATCACCCAAGA	scaffold14365:4274	13908
SLG-1	DAFWA8817	0	19	AATTCGTCATATAATAGG[C/G]CCGATGTGATTATGTTCTTAGTACGTAGGTTGTACTGAACCTTTTTGCACTCCTCATCGGTCCCCAAACTTTT	scaffold14365:5060	13908
SLG-1	DAFWA5923	0	89	AATTCTAAAATACAAAACCTGACCATCCATGGTAAAATGCTAGAAACACAAGTTGCCCAACAAGCTAGTAATCCTAATAGGCAAACGA[G/T]TAT	scaffold8245:33254	54409
SLG-1	DAFWA8296	0	42	AATTCAAAGTGAGTTATAACACTCAGAAGGACTGTGTGCAA[G/A]AGGAAGAGAGACTACAGAGAGATAAGACTGAAATTGTTCATTTGACTATG	scaffold9700:2228	8608
SLG-1	DAFWA1988	0	13	AATTCCTCACAA[G/A]AAGAGTTTTGAAATTCTCCCCCATGATCACTTCGTATAGCATCGATTTTTAGAGATTTTTCATTATGAACTCTTTTAGC
SLG-1	DAFWA8252	0	90	AATTCCTAGAACATCTAATCCTTGGATTGATTATCCCTATCGTCTGAGAAAACCTTTCTCGCGATCCAGCCCCAGCCAAGATCCTTGTC[C/T]TC
SLG-1	DAFWA6799	0	75	AATTCTAGGGGAAGCCCTGGAATACACTGTTGTAAAGGATTAATACAACAATGCTTTTTAGAGACTGCGTTGTT[G/T]TATATTCTTAATACAAC	scaffold28312:10319	20289
SLG-1	DAFWA6267	0	53	AATTCTATAGCCTACCTTCAAGAACTTCATTCAAGTGAGCTCCACAAATTGA[C/A]GGAGAAGCACATCGAGGTCGTGAATAATTTGGAGGCCCA	scaffold19263:10581	33043
SLG-1	DAFWA8684	0	89	AATTCATCGTATGATAGCATAAATGTAATAATGTTTTTAGCTCGAAGTTTATGCTGAACCTTCCTACATTCATCATCAGTCCAAAAAC[T/C]TTT	scaffold10065:16997	43609
SLG-1	DAFWA4984	0	65	AATTCTTTCGGGTTTCGCAATATCAAAGTGCCAAGGAAATGTGGGACACTTTACAAGTGACTCA[C/T]AAAGGCACTAGCAAAGTCAAGCGTGCC
SLG-1	DAFWA2427	0	90	AATTCAAGAATTTGCATTGGTAGCCATATTGTGGGTGTATTCGAGAGCAATTCTTACAGTGTAGTAAGAAATTGTATAATAGAGAATTG[A/G]GT	scaffold21968:4176	14182
SLG-1	DAFWA1843	0	25	AATTCACCTTGGGTTGCTACGAAG[C/T]GTTTGGAAAGAAAGATCCAAGTAAATGATTTGATTGATAATTGTACCACAAGAGTAGGTGTGACTTT
SLG-1	DAFWA7085	0	58	AATTCCAACATAGTAGGACACTCTCTAATCAATATCTGCACAAAAAATGGGTCACAT[A/G]GGAGGGAATGTCTGGCATTTAGTTAACATCTTCT	scaffold7662:2675	25195
SLG-1	DAFWA5494	0	91	AATTCTTGATAAGGAAAGAACAGAGGTTCTTGTATCTTCATATTGCTTAGAATTGCAGATGTTAAAACTACTACCAATATCTAATACCCA[G/T]A	scaffold10317:1268	1366
SLG-1	DAFWA8199	0	83	AATTCAACATGCCAAGTTTTTATGGGCAGGAAGGTATCATTCACCAAACTTCTTGTGTTGAGACTCCACAACAGAATTCTGT[C/T]GTGGAAAGA	scaffold10065:40626	43609
SLG-1	DAFWA3750	0	64	AATTCCTTTTAAGCATTTGATTTCGCGCGTAGTTGTGGCCATGGAACGATACTCAGCTTTAGC[T/C]GACCAGCGAGAGACTGTGTTTTGTTTCT	scaffold22494:5652	12795
SLG-1	DAFWA3200	0	20	AATTCTGACAAGTTGTCTT[T/C]CCAGACCATGGTCAACCCGAAGAATGTGAGTGACATCACTCTAAGGTCAGACAAACATATTGAAGTTGATCC	scaffold8558:9011	28343
SLG-1	DAFWA767	0	58	AATTCAGTATAATATATGAATATAATTTAAGGGATTTATATAGGTGTAAAAAATTGA[C/T]AAATGATTTATGTAATTTTACTAAAACTTAGAGT
SLG-1	DAFWA6383	0	67	AATTCAACGTAATCAACAGCGCATTGTTAAAAAAGCGATGTTGTGTGGGTATAAGAACAACGCAAT[C/A]ATACAAAAGCATTGTCGAAGACCTT	scaffold21895:2101	30268
SLG-1	DAFWA2996	0	53	AATTCTTGTGCTACCGTTTGATGATGCTGTTAATCCTCCTCCAAAAAAAATT[C/A]TTGGAGGCTTCCAAGTATGAACAATGAACTGTTGGAGGA	scaffold7662:8534	25195
SLG-1	DAFWA1322	0	30	AATTCTTAACCCAATCACAGTCACCAATG[T/C]TGGCACCATTGGTAGACAAGCCACCCACATTCATAAACATTTCCTCACTTAACTCAAATAAA	scaffold4753:7639	12893
SLG-1	DAFWA3556	0	62	AATTCATAAAAAGGAGTTCAAGAGGAAGGAAACCTTCAACTACTAATATAGAGAAGAGAGT[C/T]AACAAAGAATTTGTTGATTGGTTTCGAAGG	scaffold14365:1639	13908
SLG-1	DAFWA7598	0	10	AATTCCACA[A/G]AGCAATTGTTAGTATGGCATAGTTTGGAAACTGACAACAGATTGGATTGAATATTAGGAACACATAAACCATTATTGAGGTG	scaffold10065:3127	43609
SLG-1	DAFWA1701	0	24	AATTCTTCTCTGATTCTTTTGTT[G/A]TCAAGGATCTGAAGTCAGGTCAGTCTCTGGTGCAAGGACCTCTTAGGCAAGACCTTTATCACATTCCA	scaffold10065:3098	43609
SLG-1	DAFWA8073	0	63	AATTCACTTCATGATGTATCTTTGTGGATTTTAACACATATAGCCCATTTGAAGCCTTAGCT[A/G]TACCAATCCTCTTCGAAGAGATCCTCTCC	scaffold11451:23276	47379
SLG-1	DAFWA4122	0	74	AATTCACAAAAATAGACTAAAGTCAACTATTGTTTAGCCTAAATCAATACCGATTAATTTCTAAAATTATTCA[T/A]TTGTAAAATAAATAATAA	scaffold3417:2913	9525
SLG-1	DAFWA4310	0	58	AATTCTGGGATAGAAATTCTCTGTTTTCACAAATCAATTAACTCATGCATATTCGTG[T/C]TTACTTGTGAGTCTTGTATAGAGTTTTTAGCTGA
SLG-1	DAFWA4928	0	86	AATTCCAGAAACTCCCGAGAATCCTAATACTACTCTCATGAATTAGGATTCTAGTTTGAATAACTAAATGGTCAGATAGTTGGGT[G/A]CACCTC	scaffold8245:25043	54409
SLG-1	DAFWA4407	0	81	AATTCTTTTGTAACAAGCCTAGCCTTGTACCTAGAAATGCTTCCATAAGGATTTCTTTTTATTCTGAATAACCATTTGCA[A/G]CCAACTAGATT	scaffold10065:1644	43609
SLG-1	DAFWA8516	0	49	AATTCATTTGATGCTGTTGAGGTTTATAAGTCATGTTTGAGAGGTCCC[T/C]ATCTGTATGTCCAAGGAGAATTAACTAAAGCTGGATCATTATT	scaffold4753:7713	12893
SLG-1	DAFWA5138	0	36	AATTCTCATGAAATCATTTATGATGGTATACCTCT[A/G]GAGAGTTAAACTCACAGAGCCTATGAATGTGTATTCATTAGGTATGTTGTAAACAA	scaffold17003:17351	27136
SLG-1	DAFWA6732	0	17	AATTCCCATATGGACT[A/G]GAGAACCAATGAGCGAATAAGTTTTTGGAACTAAGAGGTAAAATCTATCCTTCGCTCATTCGGGAATTTTACAAC	scaffold1856:7739	10697
SLG-1	DAFWA4618	0	83	AATTCCAAGTTCTCTCCTTAGAACATAGAAAGTATCACTGGGAAGGGGCTTGGTGAAAATATCTGCTAACTGTTTAGATGTT[A/G]CAACAAATT
SLG-1	DAFWA7115	0	79	AATTCAAATTAAAAAGAAAAGGTCGCAAAGCTCACATATAGAAGAGCTAATTTAGACACATTACTTGCTGAATCGAGA[T/A]ATGCTGGTAACCG	scaffold10065:15692	43609
SLG-1	DAFWA2988	0	74	AATTCTAAAGTGTAATTTAAATATGAATAAATGGACAAAAACTCAATTGATTTCCTCCTTAAATGTGTAAATA[A/C]GTTAATCTGCATTTTTTC	scaffold11376:3954	4223
SLG-1	DAFWA7694	0	90	AATTCACTCCGAAGGAAGCAAGTTTATCAGCACAAGTATTACCTTCACAATATATATGAGAAACTCTAAAATTCATTAAGTTGAGAATG[A/C]CA	scaffold95382:3974	6976
SLG-1	DAFWA779	0	16	AATTCTTGAAAATCA[C/T]TTTTTACTATTTGAAATATATTATGTAGTAAGTAGAATATTATTTGAAATTTTAAGAATATCAAGAGTTTCTACAT	scaffold11376:3711	4223
SLG-1	DAFWA5864	0	40	AATTCTCTAATTTTTTCTCATGGTATGATGGGTATCTCC[A/G]ATGCTTATAATGGTACGAAATTGTTCATCAATCCTAATTTGAAAGAAGTTTC	scaffold55143:14367	15009
SLG-1	DAFWA3217	0	40	AATTCAATAATAGAGATTTGGGTTGTTTTATCCTAGAAA[T/C]GGCGTGGTTGATAGTCTGCATGCACATTTTGGGCAGTATCACGGAACATCTT	scaffold2905:1898	5126
SLG-1	DAFWA3304	0	79	AATTCTCCTCCAATATGTAGACAATATAATCAAGTCTATACTCTCTAATATTTGTTGGTCTTTTACTTCTTCTAGGTT[T/C]GATTTCTAATCTT	scaffold2905:3900	5126
SLG-1	DAFWA5214	0	38	AATTCCAAGTTCTCTCCTTAGGATATAGAAAGTATCC[C/A]TGGGAAGGGGCTTGGTGAAAATATCCGCTAACTGTTTAGATGTTTCCACAAATT
SLG-1	DAFWA8849	0	54	AATTCAATGGGTTCCACCAACCCCTTTGGCGGTGATGGTGCATCTATTAACCG[C/T]CCTCTCGTATTCAGTGGTGAGGGATACGCCTACTGGAA	scaffold14365:4836	13908
SLG-1	DAFWA8719	1.453	50	AATTCACCATCATACATCGCCCCAGAAGGCCATTGTATTTTTCCAATTC[C/T]GTTCCTCATCCCCCGTCTCCACTCACCCTCATATACACAACC	scaffold21369:8191	29787
SLG-1	DAFWA6736	0	23	AATTCCTGACTTGTTTACATTT[T/C]TGACACATGTCACAGGAATCTTGAGCTTTAAAATCGAGTTTTGGAAGACCGATTACTAAATTATTTTTT
SLG-1	DAFWA5360	0	65	AATTCAATTAAATACTACAAGGATGTCCTTGCAACTAGAAGATAGATCCATAAAATATCTCGAA[G/A]CAGTTACAGAGGATGTTCTGGTCAAAG
SLG-1	DAFWA6740	0	13	AATTCCGATTGT[G/A]CCATTGGCTTTGAAATATTATTTCGAGTCAAGATAGACATCAAGTTCGTTCAGAACGCATTTCTAAATATTTTTCACTC	scaffold5135:24623	31653
SLG-1	DAFWA8600	0	66	AATTCAAGCTCTGACATTTTAGCCAATGCATCAATATCATGGAGTTGAGGTGTTGCCCATCTAAC[T/C]AAAGATTGTGCAATCTTGGCCTTGAG	scaffold547:1304	12376
SLG-1	DAFWA7655	0	21	AATTCTCTAAGCTACAATCT[A/G]TGCAAAACTAATCTACCAAACTAAGTATAAACTTTGACCATTGTTCTCTAATCCGGTTGACTTGGTCATCT	scaffold618:1238	6794
SLG-1	DAFWA5022	0	76	AATTCTTCTCTTCTTCTACGGAGATACCGGACACCTTAAGAGATGGATTACAACTTGATTGTTCTTTTGTATACA[G/A]AAATCTTGCACTAACA	scaffold44530:4285	18381
SLG-1	DAFWA3695	0	30	AATTCTCTTGATCTCTCGATTGGACACCT[T/C]TGCTTGCCCATTTGTTTGCGTATGATAAGGTGATACTACCTTGTGTCACACCATGTAGTGTT	scaffold30542:9220	10597
SLG-1	DAFWA6422	0	79	AATTCATCATATGATAGGACCGATATGATGATGTTTTTAGCATATAGGTTGTATTGAAACTTTTTACGTTCATCATCG[T/G]TCCATAGACTCTT
SLG-1	DAFWA6695	0	35	AATTCAACGTAATCAACAGTGCATTGTTAAAAAA[A/C]TGTTGTTGTATGGGTATAACAACAGCGCAATCATGCAAAAGCGCTGTCGAAGACCAT	scaffold618:1536	6794
SLG-1	DAFWA1866	0	72	AATTCCCTATCTAAGACCGGTCGCCACTTCTCCAGAAAAGCTGCCCGATCCATCTATACAATTCCCATTCT[C/A]ACCATTCTCTTCCTCCAACG	scaffold62298:1140	11746
SLG-1	DAFWA7880	0	15	AATTCTGATTCTGC[C/T]GATGATCTTGCCACCACGTTTTGTTTCTTGCTTCTCCATGTTATTAAATTACCTCCAAGGAAAGTACAATACCCAAT
SLG-1	DAFWA7899	0	85	AATTCAGTGATGATTTAGGTATCAATCACAATTTTTTTGCTCCTAGAATACCACAACAAAATGGTGTTGTAGAGAGAAAGAATC[G/A]GTCCTTA
SLG-1	DAFWA4273	0	30	AATTCAAGAGAAGAAAGGCGTTGGCAAAT[G/C]AGGTGCAAAAACATAATTTTGTAATCTCATTTGGTTCCAAAAGCATCTCATCCTTGGGTAGA	scaffold1097:71461	82361
SLG-1	DAFWA6541	0	54	AATTCTTTGATGAATTTGATGTACAAGGAGGGAGCTTTTATTTCAGATCACTT[C/G]AATGATTTTCAAGGGCTCCTAAATCAATTATCAAGAAT
SLG-1	DAFWA494	0	84	AATTCTCTAGTGGCTATATCCATGGTACCGGAACATATATTGGCTCTGATAATATTATCTACAAAGGTCGATGGCGATTGAAT[G/C]TTAAACAT	scaffold21369:8320	29787
SLG-1	DAFWA2350	0	54	AATTCTTTTTTTCAAAAATGGGTTAATGGGCCAAGTACACAAAACTGAAAATT[C/T]AAAAATAAAAAAGGCCCAAAACATAGTGAAAGTCATGG	scaffold4372:5486	10109
SLG-1	DAFWA7232	0	69	AATTCAAGGATCTTGACTCCATGCCTTTGGCGACATTATTTGGAAAGATTCAAGAGCATGAGATGGAG[T/C]TTGGACGCTTGACAAGCACGAAG	scaffold7547:1919	7448
SLG-1	DAFWA5132	0	76	AATTCAAGAAGGTAGCGTCTAAGGTCTTGTAATTGGACCTATAAATGCGCTGTTTATGTAAGACCTATATGACAA[C/T]GCTTTGTGGACGATGC	scaffold47734:6788	9410
SLG-1	DAFWA4657	0	27	AATTCTTAACTATCTTATCTTTTTGG[G/A]ATATATAGGGCTTTATATTATTAGACTAATGTTTGCTAATGCCTTGGTAATGCCGTAAATATATT	scaffold56937:2396	2525
SLG-1	DAFWA3042	0	56	AATTCCCTTGATAGGTCCTTCCAAACAATGTAAAATCTCAAAACTTGTCAAGGAT[A/C]AAATTTAATACACTGACTCAGGTGTTACATCCTACA	scaffold11600:27662	32082
SLG-1	DAFWA4665	0	84	AATTCTTGCATTGTAAGTGAGCAAGATGAGTCAAGTGAGGTAAACTCTTCCGATTCTAGTTCAAATTATGATATTTTTCTCAT[G/A]TGTGATAT	scaffold5808:13792	20863
SLG-1	DAFWA2582	0	53	AATTCTTTTAGACTCGTTAAAACATGTAAATGCAAATGGGCTTAAGCTAACG[C/T]TATTTTATCTTCCATTGTCTTTTTAACTTTCTTTTAGTT	scaffold12090:4671	27216
SLG-1	DAFWA8694	0	67	AATTCTTCTGCTGCACCAACAATTGGTATCAGAGCCAATTGGTATATGACTCTTAACTTATGCGCC[T/A]TATAATGGTTAAAGAGGGTGAATGT	scaffold82360:1212	5029
SLG-1	DAFWA5202	0	15	AATTCACCCTCTTA[T/G]AGGAATCTCTTTAGCACATTTTTTTCTCCAGTAAAGCAAAGAACAATAAAATAATAAAAAATAATGGCAGCCTTTGG	scaffold95429:1175	1834
SLG-1	DAFWA4644	0	92	AATTCCACGTCTCCTTGGTGGTGGTCCTCTCTAGTGTTGACTTTTTTGGTCATTTAAACCATGGATTCAATTATATCAATGGCTTCTTGCA[C/G]	scaffold4144:10047	21066
SLG-1	DAFWA3143	0	15	AATTCTAGACTCAA[T/C]GTAGAAATTTTGTTTTCAAGAGTAATGTATTTAGAACATGAAGAAGAAGATGGTATATTTCAAAATATGTCTAACTC	scaffold10463:18791	52990
SLG-1	DAFWA7384	0	68	AATTCATTGCACATCGTTGGCCACAAGCAATCAAATAAAGCGAATAGAATAAATAAAAGGAACAAGA[G/T]AATTTGTTAACGGTGTTCAGTCAA	scaffold82360:1082	5029
SLG-1	DAFWA4455	0	26	AATTCATTTAGTTACATGGGAAACT[G/T]AACAACAACTTAATAAACCAAATAACAACACTTTTTAGGAGCTCTCAAGTGTAGAAAAATTAATTT	scaffold59835:17850	23324
SLG-1	DAFWA8084	0	47	AATTCAAGAGGAGAAAGGACTTGGAAAATGTGATACAAAAGTTAAT[G/T]TTGTAAACTCATTTGGGTCCAAAAGCATTTTACCATTGGATAGAT	scaffold10463:31087	52990
SLG-1	DAFWA8502	0	18	AATTCTTTCGAGTTTCA[T/C]AATGTCAAAGTGCCAAGGAAATGTGGGACACTTTACAAGTGACTCATGAAGGCACTAGCAAAGTCAAGCGTGCC
SLG-1	DAFWA5193	0	75	AATTCATCCTCTATATGTGAATATGACTGGCATGAAATGTGAATCATGGAATAAAGAGTGGAGCGAAGCACTCA[G/A]GCACATAGGGAGAAGCT	scaffold1097:9404	82361
SLG-1	DAFWA7613	0	17	AATTCTCATCATCTCT[T/C]ACTAGACTACCCAAAAGCCTCATAATCATATAGATGTAAACACTCATAGGGCCAACTTCTTCCTCACTTTCAATC	scaffold30191:7264	15212
SLG-1	DAFWA4527	0	22	AATTCTTACTACACTGTAAGA[T/C]CCAATCTCGAATACACCCACCATAATATGGCTACCAATGCCAATTCTCGAAATTCCCACAATATGGCTAA	scaffold3649:18805	40566
SLG-1	DAFWA1864	0	11	AATTCCAAGG[G/C]TACCCACCTTGACCTTTTTCACATCAGAATAATTATGGCAGTCAAAAACCTGCTCCATTTTCAACTCCCATTCTAGCTAGG	scaffold18378:17764	18417
SLG-1	DAFWA3691	0	57	AATTCAAGCTAGAGGAGGACATTCTTATTTTATTACTTTCACTGATGATGTTTCGC[A/G]ATATGGTTTTATATCTTATGAAACATAAATCTGAA	scaffold36851:1715	2562
SLG-1	DAFWA8232	0	58	AATTCTTCGTGAATCATTTTTAGCTTGCATCCATTAGAAGTCCAACTAAATGGTCGC[G/A]TGCTTGTTGTGCCTTCTTTGCCCTTGTTCTATTC	scaffold57432:2440	23360
SLG-1	DAFWA1938	0	89	AATTCTTTAGGGTGGCAAACTGCAAGTTTGCGAAGGAGAAATAGGACAACCTAAAAACTACACATGAAGGTTCCGTATGAAACTATGA[G/C]AAA	scaffold1097:16004	82361
SLG-1	DAFWA781	0	22	AATTCCCAAAATTAATTTATT[G/T]ATTACAATTTTGATTTCATTACATAACTCTTCTTACTTTTGACTAGATTGATTCATTTATCTTTTTTATA	scaffold7286:5718	19215
SLG-1	DAFWA4825	0	33	AATTCCATAAACCCCCGAGAACCCTATTACTA[T/C]TCTCGTGAATTAGGATTCTTGTTTGAATAATTGAATGATCAAATAGCTGGGTTCACCTT	scaffold3704:6978	46882
SLG-1	DAFWA6024	0	33	AATTCCTAAATGATAGAATTTTGCCTTCTAGT[A/G]TTTTTTGAGAGAATTTAGAGAAGAAATGCTCAATTACAATCTAATTTTGCTCGAAGGAA	scaffold5234:10549	10609
SLG-1	DAFWA7176	0	24	AATTCCTTGACAAAAGTGGAAAA[C/G]ACAATCTCGTGGCAGATCACTTGTCACGATTAATTAATGAAGTAGTCACAAAAGGAGAAATAGAAATA	scaffold14961:15340	18967
SLG-1	DAFWA8777	0	10	AATTCAAAA[T/C]GGAGAATCAAATCTGATTTGAATTTGCCTTAAAGAAGATTGAAGCCATAATGAAGAGCTATGAAAACAAGGATTGGATTCCT	scaffold18378:16099	18417
SLG-1	DAFWA6822	0	45	AATTCAACTGAAACCTACACGGATGTCCCTATAATTAGCAGATA[G/T]GTCCATAAAATACCCTGAAGGAGTTGCAGAGGATGTCCTAGTCAAAG	scaffold23669:16048	18075
SLG-1	DAFWA1021	0	10	AATTCATTC[A/C]ATGCTACAGAGGTTTACAAGTCATGCTTGAGAGGTGCCCATATGTATATCCAAGGAGAAGTAACAAAAGCTAGGTCATCATC	scaffold3524:68899	79386
SLG-1	DAFWA8716	0	14	AATTCAGAATCAA[A/G]GCATCCTTGAAGAGTGAACACTTGCATTAATTACTGTCAACATCATTAAAGTTGGAGAGAGACTACACTTAATGCATC	scaffold1501:1350	7860
SLG-1	DAFWA8832	0	58	AATTCATGGTAAAGAAATAATGCTTGATGAGGATCAACAAACCAATGAAACATCTAC[G/T]ACTCAAGAACATAATATGGAACTTGATCCACCTT
SLG-1	DAFWA2790	0	76	AATTCTTGATGGAAGAAGCGTTTTGTATGAACATTTTATTTCTTCTTTTGTAAATTAAATCTCTAAAGATCAGAA[G/T]GGGAGGACTAGATGTA	scaffold20905:6767	13314
SLG-1	DAFWA3538	0	65	AATTCTTTCGGGTTTTGCAGTGTCAAAGTGCCAAAGAAATGTGGGACACTTTACAAGTGACTCA[C/T]GAAGGCACTAGCGAAGTCAAGCGTGCG	scaffold6007:5167	11065
SLG-1	DAFWA6053	0	88	AATTCTTTCATGTTTCGCATTGTCAAAGTGCCAAGGAAATGTGGGACACTTTACAAGTGATTCACGAAGGCACTAGCGAAGTCAAGC[A/G]TTCC	scaffold7286:14410	19215
SLG-1	DAFWA4422	0	38	AATTCAATATACACCACATCAAACTCTACACCAACAA[T/G]GTATTTGTCTAGTGGTATAAAGTTCCACTAGATGCCCATGTAATCAAAAAGTCA	scaffold38165:6247	9510
SLG-1	DAFWA5098	0	47	AATTCTAGGATAGAAATTATCTATTTGTGCACATCAATTAACTCAT[A/G]CATATTCATGATTACTTGTGAGTCTTGTATAGGGTTTTTAGCCGA	scaffold6007:4006	11065
SLG-1	DAFWA8685	0	88	AATTCAAATTGACAATTTGTATCATCCAAATAGAAGTTCCACTTGAAAGACACGTGTTTGGGGAAGGAGGATGATGTGGGATTGTGA[T/G]TCAA	scaffold57432:2581	23360
SLG-1	DAFWA569	0	16	AATTCTTTTTCAATA[A/T]ATAAAATTTATAAGTTAACACTTTACTATATTTTACACTTGCATCTCTTTCAAGATTCAATCGTAGTATATTATAG	scaffold11600:8202	32082
SLG-1	DAFWA1234	0	86	AATTCATGCATTTGGGGAAAGGTTAGGGTTTCAGATTTAGGAGAAATTGGGGATTGTAGGAAGATTATAATGCTTAGTAGGATTC[T/G]TAGTAG	scaffold10463:27826	52990
SLG-1	DAFWA3875	0	90	AATTCAAGACTACTAGTTATATTTATATCTTAGTTTATATTTCATTTTGTATTTTATAGTCTAAGATGTAATAATAGGTGGATTCTTAC[G/T]GA	scaffold36673:11929	13776
SLG-1	DAFWA3953	0	37	AATTCTGCAACTAACATTTATTTATTGCTTTATTAA[T/C]TTATTCTTTACCAACCTTCCTTCAGGAAGTAGTTCGGTTAATAAAGGAAAACGAA
SLG-1	DAFWA2122	0	91	AATTCATATTAGGATTGTTGGATAATTGTCTTTGCATGATTAATCGCATAAACTGAACTATTAAAGTGCATGTAAGAACATATTGATCAC[A/T]A	scaffold24867:10242	14077
SLG-1	DAFWA4498	0	6	AATTC[A/G]TTGATACACATGAACAACTAGTAGATATCTTTACAAAACCTTAGGCTAAGGAACCTTTCAATAAACATAAACGAGAATTAGGCATA	scaffold68879:1535	3670
SLG-1	DAFWA7079	0	9	AATTCACC[T/C]CTCAGGATTGCATTACCATGTTCTCTAGGATTCACTTTTGTATTAGCTAAAAATGTTGATTTTTGATTTTCAGCTAATTGTTT	scaffold4372:5186	10109
SLG-1	DAFWA1876	0	44	AATTCTGTTTGTAATGTTGCATGATTGTGGACAATTGTTGTTT[T/C]TGTTGTTAAGCTGTTTTTCTGATTATGTTTTGAACATTGTTTGAACAT	scaffold14961:7034	18967
SLG-1	DAFWA1825	0	57	AATTCAGACCCATTGCCTTAGCTAATTTTCAGTTTAAGATTATAACTAAAGTGTTG[C/T]TGTTAGATTAGCTACTATTGCTCCTTGGATAATTT	scaffold49026:13566	15229
SLG-1	DAFWA80	0	24	AATTCAGATTGGGGTTGTTGGAT[G/A]ATTGTCATTGCATGATTAATCACATAAATTGAACTACTAATGTGCTTGTAAGAACAAATTGATCAATG	scaffold1097:47069	82361
SLG-1	DAFWA590	0	80	AATTCTATGAGACTGTAAGGATCCGTGAGGTTTCTGAAGATGTTATTCGTCTCCGCATGTTTCGATATTCCCTTAGAGA[C/T]AGAGTTAAGATT	scaffold12947:3393	27539
SLG-1	DAFWA6195	0	23	AATTCTCAATAGCTACAAGACA[A/G]GAAGGGTTGCCAATAGGAAATCTTACCAAGAGACCGACCCTTGAAAAACTGTCCTTTGACTAAAGGAAT	scaffold21369:7832	29787
SLG-1	DAFWA578	0	59	AATTCCCACATATTGCTACCTGTGCCAATTCTTTTCCCACAATACTGACTACCAGTGT[C/T]AGTTCTCGAAATTCTCAATTTGGCTGCCTGTGA	scaffold12855:2989	13752
SLG-1	DAFWA1700	0.486	28	AATTCACTCTCAACCCAATTTATAAGT[T/C]AGAGAGTTAACCATCAACCGAAGAACATATTTGGTGTCCCAATATTTTGTATCACTTCATGTGT	scaffold1010:53388	55844
SLG-1	DAFWA8237	0.551	7	AATTCT[A/G]ACCCAACCAAACTCGGCCAGACCTAGCCAGGATCCCTCAGACACAATCAGAATTAGTCAAACCAGGACACACGCAGCCAGTCTCA	scaffold1845:19427	25148
SLG-1	DAFWA253	0.594	83	AATTCCAAGAACTGATAAATATGTACATTAGGATCTTCATGAGCTCTACCTCCAAATTGGTTTTGCATCACCATTTGGATCA[T/G]AGCAGATGG	#N/A	#N/A
SLG-1	DAFWA1284	0.508	46	AATTCGGTTTTGAGAGAGAAGTGGAATGTGAGAATGAGAGTAAGA[A/T]CAATTAGAATGAATTAGCATCAATTAATTAAGCCTTGAAGTGCCTC	scaffold9180:9666	16026
SLG-1	DAFWA4221	0	33	AATTCAAGGCTTTTACAGATAATGCCAACCTC[A/C]TTCATTTGACATCTAATAGATGAAGAGGTTTGGCTCTTACAGAAAAGAGATTAGATAGA	scaffold21391:9647	19109
SLG-1	DAFWA7665	0.007	82	AATTCCAACAAAGTCATGTCTTGCTCAAATGGGTATCCTAGGTGCAAATATTATGCCAAACTGTGCTCTATGTAGGGTAGA[G/T]AAGGAAACAA	scaffold8750:9111	12750
SLG-1	DAFWA7116	0	81	AATTCAACATAATCAACAACGTATTGTTAAAAACGTTGTTGTATAGGTATAAAAATAACGCATTCATAAAAGAACGATGT[G/T]GAATACCATTA	scaffold178:17548	39720
SLG-1	DAFWA6224	0	28	AATTCTGAGTTTCAATGCCTTTAAATA[G/T]GCTCTCAAATCAACCATAACACCTCTATGAAAAGGTACGAATTGATTGGAATGAAATCATTTCG	scaffold178:4288	39720
SLG-1	DAFWA1575	0	40	AATTCCCTATACTAATCTTTAAAAGTAAGTACATATTTT[A/G]ACCATTCTTCCCTAATCTGGGTGACTTGGTCTTCTAGGTATGTCTCTAGATC	scaffold7051:28230	76121
SLG-1	DAFWA7217	0	87	AATTCTGATTTTAAGCTCTGCTTCACCATCTCAACTCCATCTGATTTACTACCAGTGATTAGAATGTCATCAACATATAGACAAAT[T/G]ATTAG	scaffold2847:83215	85678
SLG-1	DAFWA1653	0	40	AATTCTTCAACCAATTTTATGGCTTAAGTTATCAATTGT[G/T]TGTAAATTGTAATGTTATATTTGTTACTAAATTGTTATTATGTTAGTGTCAT	scaffold2847:37458	85678
SLG-1	DAFWA7836	0	87	AATTCAAGCCATCTTTGGTCTTACCAGGGACATTGAGTAAGGTACCAAGGAGACTTTCAAATACATTTTTTTCAATATGCATAACA[T/C]CGAGG
SLG-1	DAFWA8646	0	14	AATTCCCTTTTAC[G/A]GGTTCCTTCGAACTCTGGGCTGTATTTCCCGCAGTCAACAAGCATGATATATCAACATTATTCTTAGGACCGCTCTTG	scaffold62767:31729	34703
SLG-1	DAFWA4320	0	77	AATTCGAAATTAATTATTTCCTTAATTAAATATCACACCCAAACCCCAATAATATTAGCCACACTTTAATTCCCTT[A/G]CATTTTGTCAAAAGC	scaffold21391:3690	19109
SLG-1	DAFWA3726	0	78	AATTCTTATGTGGATATTGCCTTATGGACAACTCCTTATCCATCCACCTTTATTCTCCTCAGTTACTCAACAAAACA[T/C]GTTGCTCTCCAAAT	scaffold29760:25713	26159
SLG-1	DAFWA1773	0	86	AATTCTAAGACTTTTCAAATATATGAGTAACATTTAGATTTCTTATATCTTGGGTAAGTAAGAAGATCCAACTATGTACTACACC[C/G]TCTTAC	scaffold14838:13730	23624
SLG-1	DAFWA6081	0	14	AATTCCATTTTGA[A/G]CATAAAATTGCGGAATCATAAACTCAATTCCATTATCAGTTCTAATAGTCTTAATAGCATGCTTATACTGAACATAAA	scaffold2847:66402	85678
SLG-1	DAFWA7851	0	79	AATTCAATGGTATGAAGTTGTGTTTTCATATGATACTGCATTGAGATAAGAGTGTTCTAGGTTTTATTTTTTTGTGTT[G/A]AAGAGGGTGAACC	scaffold50869:12619	30741
SLG-1	DAFWA3804	0	73	AATTCTGTACTTTTCAATTATGATGAATGAAATGAGTGTTCTAGAATTACATAACCTCATATTTTTTGTTTC[G/A]AATTTTAATTTAGCTTTAT	scaffold7638:25736	28282
SLG-1	DAFWA7449	0	35	AATTCTATCAAATGCAAGTAGTCCGCTCAACTTC[T/C]AGAGTCTTCCAACACACATGCTCTCAGCAAGTCTTCCAAAGATTGAATAGTCCGTTC	scaffold17626:5989	20001
SLG-1	DAFWA766	0	34	AATTCCAGATTGTACATATATAAAATAAAAACA[C/G]ATCTTAACACATATATACCTTATACATATACTTCAACAAATTGCAAAATTGTAAAGTG	scaffold2847:55582	85678
SLG-1	DAFWA3417	0	54	AATTCTTCACTTGAAAACTCGAAGAAATCATCATCACCATTGGATTGTGATGA[G/C]CTATGTCTTTCTATGGCAAAATAATCATCCCATTGAGA	scaffold1656:239	3207
SLG-1	DAFWA8159	0	82	AATTCCCTCGGTCAAATGAAGCTTCTTTCTAAGCTAAATAGCCTAAAATACTGTTGTGGTGTTTATGTGCAACAAGTCGAG[T/G]CCCCAACATC	scaffold9180:12841	16026
SLG-1	DAFWA1276	0	51	AATTCGATATTTTCATAACTTAACGACAAAATCTTACATTTGTGGATTTC[T/C]ACAACATCATTGTGGTGTGCAGAAAGAGATAACGATAGAAG	scaffold17626:334	20001
SLG-1	DAFWA5075	0	16	AATTCAACAGCCTTT[C/T]GTATGGGGTGGGGAACCTGAGTTGTTGATGGCTTCTCACGTTTTGAAGTGAGTTTTAGAAACATATTTCTTTGCAT	scaffold58876:10827	12977
SLG-1	DAFWA4532	0	18	AATTCTAGATTATATAT[G/A]TATAAAATAAAAGCACGACTTAATCCATATATATCTTATACATATACTTTAACAAATTGCAAAATTGTAAAGGG	scaffold2240:3674	10598
SLG-1	DAFWA3323	0	72	AATTCACCTTAGATTTAGTTCTATTTGTATATTATTTGTTTAAAATGTATATATGGTACGAAAGTGACTCG[A/G]GTGAGAATAATTGTTATTGT	scaffold99285:7447	8796
SLG-1	DAFWA3707	0	58	AATTCAAAAGAACATTAAATTCAATTATTATTATTGAATAACATCTAAATATTTATC[C/A]ATCAATAACTTTACATGGATGAATGTTACTGTTA	scaffold30409:10078	13154
SLG-1	DAFWA8799	0	71	AATTCCTTAATCTTTGATGCGTTGTCAATATTCTTTAAACGCATGTTGTTTATATGAGTTAAGATTCTAT[G/A]TTGATGCCAAAGGTAAGATGA	scaffold80778:5114	8255
SLG-1	DAFWA8320	0	60	AATTCAAGAGCAGAAAAGGAGAAGGCAAATGAGATGCAAAAGTTTGAATTTTAATCATG[T/C]AAGTTGGTGCTTTGGTTAATATTATTTGTTTG	C26451585:41	100
SLG-1	DAFWA5356	0	70	AATTCAGTAGTAATTAAACTCACGTAATAAAAACAGGATAAACTTCCCAAAATCAAATAACAATTACAT[T/G]AGAATAGAATCTAGGAGTACAA	scaffold2333:8042	30434
SLG-1	DAFWA8001	0	60	AATTCAAGGAGTATGCCTTTATTTGGTGGGATCAACTTGAAAAGGAGAGGAGAAGGATT[G/A]GTATTGAACCAATTTACATGTGGGATGAAATG	scaffold7638:22053	28282
SLG-1	DAFWA7135	0	7	AATTCA[T/C]GATTTTTGAGTTTATGGCCTTGTTAGGATTTCATTTTAGAATTTATTTATGACACTTAAGGTGTTTAGTACTTATAGTTAGGAAA	scaffold2493:4502	54155
SLG-1	DAFWA3260	0	73	AATTCAAAGATATCAGCTAAAATAGGCAATTTAAACAACATGAAAATTAAAGAGATAAGGGTAAGAAAAATC[C/T]TGCAATAAGGATTTTTATC	scaffold10812:4482	17148
SLG-1	DAFWA8717	0	72	AATTCTTTAGAGTGTCACAATGTCAAAATGCTAAAGAAATATGGGACACTTACAAGTGACTCACGAAGACA[T/C]GAGCGAGGTTAAGCACACTA	scaffold18052:4618	22347
SLG-1	DAFWA6003	0	41	AATTCTATTAATTAAGCATTGTTATAATAATTCATGCTGG[A/G]TTGGAATCTACTTGTGAAAATCGTGATTGTTTGATTTTAGGACTTATTTTT	scaffold11068:4433	7445
SLG-1	DAFWA3735	0	19	AATTCTTTATTGGGTATT[G/A]CAATCAACGAGATGATAATGGCCTAAATTCATGAAAATATAGATGAAAGTGATTGTCGTTGTCTCGTTGACAT	C28524082:264	805
SLG-1	DAFWA6130	0	59	AATTCAAGAGGAGAAAGGAGATAGCAAATGTGATGCAAAAACATAATTTTTTAATCTC[G/A]TTTGGATCCAAAAGTATCTCATCCTTGGATAAA	scaffold2333:26273	30434
SLG-1	DAFWA1745	0	21	AATTCATTGGATAAAATTAG[T/G]TACTTGAATAAAGGTGTATAACTTAATTTTAAAAAGTAAAAATAGAGATGATTGAATAAAATGAGTTAATT	scaffold1277:23156	23746
SLG-1	DAFWA2407	0	69	AATTCTATTGTATAGGGTTGTTTAGAGAGCATTTTGCATACGTGTTTACTGTATTTTGCAAGAGAGTT[G/A]CATGCGTGAGAAGAGAGATTATG
SLG-1	DAFWA8039	0	22	AATTCTAGTGCGGATAAGCTT[G/A]CCAATTATGGAATTTCATCCATGGTTTACACTTGGTGGAACCATGCTCCAATCTTCATTCATGAGGAGGC	scaffold51244:9594	15788
SLG-1	DAFWA4391	0	80	AATTCAATGGATTCAACACATGTTCTCATTATGTGTTAATATTTTTATTTGGAGTCATACCTACTGTTATTAGCCTGCA[G/C]TCATTAGATGTT	scaffold55517:2184	19226
SLG-1	DAFWA2906	0	20	AATTCTTCAATTATTTTTC[G/A]CTGAACAAACCCTTTGATATCTTAGCAGAAAAATCAACATTTTCTTCCATCAACTAATTCACCCCCTCTTAG	scaffold7638:14246	28282
SLG-1	DAFWA3281	0	73	AATTCTAGGGTTTAAGTAAGCAGTACTGACTCGAGTCTTATCTTCCTACCTTATTCGAGCTGAAAAGCGGTA[T/C]GCGGTCGTGAACTACCTCT	scaffold14838:13487	23624
SLG-1	DAFWA3310	0	85	AATTCCTTGCCAGTTCATTTCAGTTCCTTTTCTCATGTTAGGAGTCCTTATCAGTATCACTGAGGACATTATAGACACTGGATA[A/G]CATGTAT	scaffold85540:12903	15075
SLG-1	DAFWA8422	0	68	AATTCAAGTTAGGCATCAACCAGGTTTGTTGGAAGAATTGCCTCACTGACTTGCAAACATCCATACT[A/G]ATTATGTCCCAAAAATTAGTGTAA
SLG-1	DAFWA6770	0	76	AATTCAATTAATGTTCAATGTAATATTTATGATTTGGTGTATGTAATATATGTTTTTGTAACATTACAGTATAAT[C/T]AATGTTCAATATACAA	scaffold178:17711	39720
SLG-1	DAFWA391	0	64	AATTCACTTTTAGACAATTCTCCCAAGATACACAATCTACATCATAATCACATGGCATGATAT[A/G]TTTTTTTCATAATTGAATCAATTTTTTT	scaffold38889:16681	32582
SLG-1	DAFWA6001	0	51	AATTCATGCATCTTTTAATATAAATATGATATTTGAAATATTAAGAAATT[A/T]ATATAACACGTACATGTGTATCCCCTGTTGTTTCCCGAGAT	scaffold45621:5287	8226
SLG-1	iDAFWA408	0.2	59	AATTCTCTTTCAATCATGAGTTAGAAAAAACCTTGAGAAAGAAAAAGAAAGCACAAAAAAGCTAAACAAGCCCAATCTATTCCAAAGGAACT-AATTCTCTTTCAATCATGAGTTAGAAAAAACCTTGAGAAAGAAAAAGAAAGCACAAAAAGCTAAACAAGCCCAATCTATTCCAAAGGAACTA	scaffold2493:18452-A-i1	54155
SLG-1	DAFWA5477	0.306	82	AATTCGTCATATGAAAAGGCAAAGGTTATAATGTTCTTTGCCTTGAGATTGTGCTGGACTTTACGTCTTTCATCGTCAGTC[C/T]ATAATCCATT	scaffold1030:13195	37204
SLG-1	DAFWA7131	0.207	71	AATTCACATGTGTTGGAACATGGTTGTTGAAAACCATGAGTGAGAACTTTTGGGTGTGAAATATAAAAAA[C/T]ACCTAAGTCCCACATAGAAGA	scaffold9452:1137	6392
SLG-1	DAFWA4241	0	10	AATTCCCTA[G/T]AATTTATGGCTATAATGTGGAGTAAGTTAACTTACTCTTGGAGTAAATGGATCACTCTCCATTAAAAATTTATTTTCCTATT	scaffold38889:31932	32582
SLG-1	iDAFWA61	0.414	76	AATTCTTTAAATTATTATTTTTTGCATATTGCCAAAAACAACAGTACATGTCAAAATACTAAATTAACATTAAAAAATCATCCTCTCAATTT-AATTCTTTAAATTATTATTTTTTGCATATTGCCAAAAACAACAGTACATGTCAAAATACTAAATTAACATTAAAAATCATCCTCTCAATTTA	scaffold96132:2590-A-i1	3555
SLG-1	DAFWA1388	0.299	7	AATTCT[G/A]TATGTCATGTTGTACGTTTTTGGACAATTTGTTGTTATTGTTGTTTTTATGATTATGGTTGAACTTGTATGAACATCTTTCAAAT	scaffold16139:4392	6972
SLG-1	DAFWA3523	0	12	AATTCATTGAT[C/G]AAACCTGCTTCATGTTGACCCTTCCTGTTTTTACATGTTGTGAGTGATTGGGGTAGCATAATTTTATAGTGAAAATAGCA	scaffold86491:2955	7752
SLG-1	DAFWA2493	0	10	AATTCAAAC[C/T]ATATAAAAAAAACTTATAAACTTAAAGACAAAACAACTCATATGTATAATGGAATGAACATAAGTTAACTTGGAAGTTACCT
SLG-1	iDAFWA651	0	76	AATTCAATATATCATGAAAGAACTAAACATATTGATGTTTGGATGCACTTTATCAGAGATGTCGTGGAGAAAAAAATTGTTAGAGTGGAGAA-AATTCAATGTATCATGAAAGAACTAAACATATTGATGTTTGGATGCACTTTATCAGAGATGTCGTGGAGAAAAAAAATTGTTAGAGTGGAGA	#N/A	#N/A
SLG-1	iDAFWA576	0.718	59	AATTCATTGTCTTCTCATGACTAGTCTGTTGATTTTGACTCAAATTGCCACATTTTTTTCTAAGCTCAGTCCGAGCTTGTGAGATACTTTTC-AATTCATTGTCTTCTCATGACTAGTCTGTTGATTTTGACTCAAATTGCCACATTTTTTTTCTAAGCTCAGTCCAAGCTTGTGAGATACTTTT	scaffold8388:5874-T-d1	16956
SLG-1	DAFWA2766	0.472	84	AATTCTCTTTTAATTTTTGTATCACATGAATTTGTTTGCAGTATTTCATAATTGGAACTAGAAACTGTAACACTGTGAATTTT[C/T]TGTGTATG	scaffold7706:21791	38771
SLG-1	DAFWA7892	0.242	54	AATTCAGTTTTAACATATAACTGAAAAACTGAAATCAGTTATTCTCAACAGCC[C/T]GTTAATCGATTAAAAGAGCACTTAATCGATTAACTGGG	scaffold52847:21168	37335
SLG-1	DAFWA1625	0.263	47	AATTCTGTTAATCCATTAACAGACATTGTTTAATGGATTATGAATT[C/T]TGTTAATCCATTAGCAGACATTGTTTAATCGATTGTGAATAGTAT	#N/A	#N/A
SLG-1	DAFWA2714	0.45	90	AATTCCCTTGACATTAAGTGGTGGTGGAAGGTCCTTGATGACCTTAATCTTTGCTTTGTCAACTTCGATGCCCCTGGAAGAGATCTTGT[G/A]TC	#N/A	#N/A
SLG-1	DAFWA554	0	85	AATTCTCCTCCAATATATAGACTATATAATTAGGTCTATAATCTATAGCAATTATTGCTCTCTTACTTCTTCTAGGTTCTATTT[T/C]AAACCTT	scaffold17262:6085	7528
SLG-1	DAFWA5234	0	46	AATTCATTATAAAAATATGATAAAATTTAAAGAATATTAAAGGCA[A/G]CCTATTAGGATATCATAGTGAATTTAAAATTCATTTTCATTAACGT	scaffold4036:2200	47607
SLG-1	DAFWA1936	0	80	AATTCATGCTGTATAGTGTATATGGATATGTACTGCTGATAGAACTTTTAAATTGATAAACTTGCGTAGCCAAAAAAAA[A/T]GATGTATATTGC	scaffold35008:3719	7935
SLG-1	DAFWA8811	0	10	AATTCAATA[G/C]AAAGAAAAGGTAAAATAAGGTTACCAATTTTTAGAGGATATATTACTAACATTTTATATAAAAATCGAAAAGAATTTTTATG	scaffold5332:19464	34804
SLG-1	DAFWA7532	0	50	AATTCATTCACTTTCAATCCTATTCAATAAAACCTAAAACACCTTTAGT[G/C]GAGATAATGTTCTTTCAATAAGTAAATGTTGTAAAGATGAAT	scaffold5332:9928	34804
SLG-1	DAFWA7998	0	49	AATTCACATACACTTCTGTTGGGATTCTAATGCATCAGAAAAAGTATG[C/T]CAAGGATCTATTGCAGAGGTTCAACATGAGCTCATGTAATCCA	scaffold38728:13469	15665
SLG-1	DAFWA2816	0	59	AATTCCCACGTGTGAGCTACAAGCATTGTGTATTCCTACGTTTATACATGTGATATAG[G/T]TGTGAGCAGAATGTTGATTATATTACTTGATAT	scaffold74242:49	1789
SLG-1	DAFWA7263	0	30	AATTCACTCCTACCAATCAAAAGATAATG[C/A]GTGAGTTGTTCTCGCTTAAGGGCTACATCACTACACGTATGGATGCTCTCGATACAGCGAAT	scaffold8398:13466	19898
SLG-1	DAFWA5752	0	65	AATTCAGAAGAATATGATTCAGCAAGAAAGGAGGGATGAGTACGAGGGTCGACATAAGGATTTT[C/T]TTGATGTGTAGTTTGTTGATCACAGAG	scaffold8398:13376	19898
SLG-1	DAFWA238	0	21	AATTCCAACGCTCCCTTCTT[C/T]GACCTCACACTCGGAATAATCTCTCCGCCACGTTCATTACGCTCAACCACAAATCTTTTCCAATCTTCGAA	scaffold5332:13822	34804
SLG-1	DAFWA7604	0	48	AATTCTTTAGAAAGTGTTGAATTAGGAGAAATATTCAATCATGCTAG[C/G]GCTTTAGTTTCATATTCATATTGTATGTTTCTTTCAAAATCTTT	scaffold11847:2942	4163
SLG-1	DAFWA1512	0	75	AATTCATGGCTGCAAAAGTGCAAAATATTTGAATTTAAGAATATTTAGCTAGAAGGTGATGCAAAAGAAGTGAT[C/G]AAGATCTATCTTTTAAC	scaffold17262:2236	7528
SLG-1	DAFWA3949	0	60	AATTCTAGAAAAAGCAATCTCTTTCTCAAGGAAAGATTGGTCACAAAAGTTGGATGATA[A/C]TTTTTGTGCATATAGAACTGTATTTAAATCAC	scaffold6171:6930	14597
SLG-1	DAFWA7596	0	17	AATTCTTTTTCTTCTA[T/C]AGTTGACACAAGAATGTTTTTGGCTTTAAGATCGTATTGCACTTTCTTTTTGTCTTCATCTTTCTATGAAGATTT	scaffold5332:30669	34804
SLG-1	DAFWA2447	0	58	AATTCCAAAAAATTTTTGACTTAATAAATTGACAATAAGTCTCCATTATCATAATGA[A/G]TGAAGGTGTAAACCTCCTCATTAAATATTTAGCA	scaffold45875:5962	11895
SLG-1	DAFWA4107	0	79	AATTCGAAGATCAATGATAACTCATTAGTAATACATTTATAATATCAGAGATAATCTGAGAGAATAAGTAAGTCATTA[A/G]TAATGTGCATAAA	scaffold65764:1254	2424
SLG-1	DAFWA7803	0	25	AATTCTTCTTAACCAGACATCTGA[G/T]TTTTTTTATTTATTACTATCAGTATTATTCTTTCTTTTTTTTAAAGAGGGAGAAATTACAATGTTTC	scaffold56118:4150	7727
SLG-1	DAFWA539	0	71	AATTCATGATCTTGTATATATTGTGAGTTAAAATATACATATTTGCATATATAATTGTTTCCATCTTGAG[T/C]TTGCTATAATATCTGAAATTA
SLG-1	DAFWA1839	0	7	AATTCA[A/G]TTTTATTCTTTGTTCGCCATCTCAGCTTTGTTGAAATAAATTTCAACGCCGTTATAATGGTTTCAAGAATATTCCAGTTAGAGCT	scaffold56118:5345	7727
SLG-1	DAFWA6653	0	12	AATTCATTACA[A/G]CAAGGTATTGAACTTCAGCAGCAGTGATGTTCACTTGGAATGTCCTATTTTTTGTCAATTTGCTTCTCAGGATAAGTTTC	scaffold38728:11522	15665
SLG-1	DAFWA8149	0.057	41	AATTCAGTTATTCTCAACAGTTCTCAATAGCTCGTTAATC[G/A]ATTAAAAGGGCACTTAATCGATTAACTCGGTATCAAAAGCTTTTCTATATA	scaffold13863:804	4778
SLG-1	DAFWA3645	1.349	45	AATTCTCTTTCTTTATCATCAATCGGATCGCTATTCGAGACCCA[G/T]GATTCTATTTTATCATCAATCCAATCACCATTCACGTTTTTTTTCCT	scaffold5151:26752	27556
SLG-1	DAFWA6347	0	52	AATTCATTGTTGATGTTTTTTGAGTGGATAAGGGTTATCTGTGTGTATGAG[A/G]TTTTCTAAGTGTATGAGGGTTTCTGCTTGAACAAGTTTTA	scaffold47923:12054	13405
SLG-1	DAFWA3428	0	15	AATTCTATCTACAA[T/C]ATCAAACCACACACAAACTTTTCAAAGGTTTATTATGTAAAGCTCATGCGTTAATAGTGAACGCTCTAGAAATTTAT	scaffold25970:9742	15490
SLG-1	DAFWA2954	0	37	AATTCATAATACAAATTACTCATAATTCAAATAAGC[G/A]AAAGAGGATAAAAGTTATCATGAAAAAAATATCAAATCACAGTTGTGCATTGTCG	scaffold4260:5071	6583
SLG-1	DAFWA4184	0	38	AATTCCAAAAACAAGAAGAATGAAATTAAACGAAAAG[C/G]CATGTTTTGAAGAGGGAGAGAGAATCACAGAAAGTTGATTGAGGTGGGAGGTAA	scaffold5813:15092	19892
SLG-1	DAFWA5059	0	47	AATTCTTAGATGATAAAATGATTTAAAAATGTTAAATCTTAGTTAA[T/G]TGAACTTACTTTAAAATGGTAAGATTTACTTAAAAAATATTGATT
SLG-1	DAFWA8137	0.043	60	AATTCAGCTTTTATGGCACTCTATGCCTTTGCAGCAGTTCTCATATGTTGGGTACTTGT[T/G]GCTTATAGAATGGCTTTTGGTGATAAACTCTT	C28720490:4071	4480
SLG-1	DAFWA1998	0	81	AATTCAAAAAAGTGCATAGGATAAGGTTCCAAAAAGAGGAAATACAAGTTTTTCTACACATACTTTGGTATAAAGATTCA[T/A]GCAATATAATC	scaffold83851:1041	1762
SLG-1	DAFWA5660	0	18	AATTCAAGATGAGAAAA[G/T]GAGAAGGCAAATGAGATACAAAAATTAATTTTGTACTCTCATTTGGAACTCAAAAGCATCCAATCATTGGATGG
SLG-1	DAFWA7721	0	17	AATTCCAATTGATGTA[A/C]GCTATGAAGTTTAACATCAAAACCAGTTGGGCTCATATGATAATGGGACAAATGTGGAATGTTCGAGGAAGTCAA	scaffold4036:39725	47607
SLG-1	DAFWA3958	0	61	AATTCTTTAGATATGGGTAGAGTCTCGCTCAGTAAAGAGAGTTGTAGATTTTTAAGATCA[G/T]GATAAAGTCCCATTTACTTTATATTCTATTA	scaffold5151:4011	27556
SLG-1	DAFWA4307	0	41	AATTCATGATTGTCGAGGATTTATAATTCCAACACTAGGT[G/C]AACTGGTAAAGGCTCGAGACTTTTTTATATCTCTAACACTATTAGTTTCCA	scaffold1921:16905	39894
SLG-1	DAFWA6055	0	82	AATTCGTCATAAGATAAGGCCGAAGTAATGATGTTCTTGGCCTTAAGGTCATGTTGGACCTTTCTTTTCCCAATATCTGTC[T/C]ATAAGCCTTT
SLG-1	DAFWA6394	0	6	AATTC[A/G]AGAGGAGAAAGGAGATAGCAAATGTGATACAAAAATATAATTTTGTAATCTCATTTGGTTTCAAAAGCATCTCATCTCTGGAAGAG	scaffold5151:8542	27556
SLG-1	DAFWA2695	0	88	AATTCACAAATCTTGAAAAATCTCATTGAAAATTTTGAGCATGCTTAAACAAAATTTTGAAATCATGTCAATCTATTCATAATCATT[A/T]GCCA	scaffold5151:7576	27556
SLG-1	DAFWA7122	0	57	AATTCATCAATTCCAAGGGTTGAAGTGAGGATGTTCTTGGCTTTGAGATCACATTG[T/C]ATTCTTCTTATCTTCATCATTCCAAGAGGATTTTG	scaffold4036:4037	47607
SLG-1	DAFWA7658	0	75	AATTCAGTATTGAGGAATAAAACATCTGAATCCATTCCTTACATAATGAGTAATGGGGACTTAATGTGAGGAAG[A/C]AGGTGATGTGATCCAGA
SLG-1	DAFWA5245	0	85	AATTCTTGCCCATCTTTGAATTTATTCTTTAATATTCAATTTCCTACAAAACTCAAAGAAAACTTGGACAAGAACTAATTTATT[C/G]AATCATG
SLG-1	DAFWA8408	0	48	AATTCATTGAGATGTGTCAATCTCTCCATGAACGTCAAGCATTATCA[C/T]TATTCCTATTTCTTAACCTTTACGTCCTAAATCCAACTGACATA	scaffold62320:7969	8542
SLG-1	DAFWA760	0	69	AATTCAGATGTGCTTTACCATTTGTTTGAAGACAAACAAAGTCTTAAGTTGGAGGGAGTTGATAAGTG[C/T]CAATAATGCCTAAATTTCATACA	scaffold3517:13408	42802
SLG-1	DAFWA7192	0	62	AATTCTCAGTGTGAATAAAAACAGAATGAACTTTCCTATTTGTAGGAAGTTGATAACCAGA[A/G]AAATGAAAATAACTAAACTACCCAAACTAC	scaffold10633:2698	17989
SLG-1	DAFWA4958	0	44	AATTCAGATTCCTTGCTTTGCTTACTATAAGAAGCCATTTTTT[T/G]ACCTATTAATTAGATCTAGAAATTCCTAAAAGAGTGAAGCAAGGAAGC	scaffold5151:13883	27556
SLG-1	DAFWA3261	0	62	AATTCAAAATCCATTAAATAGTGTAAAATCAACTTGTTAATGCATGGAGAACTACCTATAT[C/T]ATATGCTCATGCAATACATGATTTCCAAAT	scaffold1921:29353	39894
SLG-1	DAFWA8198	0	51	AATTCAAAAGATGATACAAATGAAGAGAAGAAATAACCTTACACCATAGT[G/A]CAAATCAATATGTAGGAGCATGAGCCATCTATCCCAGGATG	scaffold5990:7293	19271
SLG-1	DAFWA4930	0	85	AATTCACAAATCAAGACTAACACTCAACTACGGTTTAGCCTAAATCAATACCGATTAATTTCTAAAATTACCTACTTGGTAAAA[T/G]AAATAAT	scaffold30352:1991	2272
SLG-1	DAFWA3354	0	53	AATTCAAGAACTAACATTTGATCAAATTGAAAATATCAAGATACAACAAAAG[G/A]GGTGAAGACGCGACTTAAATAGAAATTATTACAATGCAT	scaffold52607:4822	6439
SLG-1	DAFWA6176	0	56	AATTCTTTAGTTATTTTCTTTTTTGGTTCAACATTTCTAATTTTTATGCAACTGG[G/A]TCTTGTGCAATATAATGGTATTTGAATTTTGAAGAA	scaffold99332:2240	6264
SLG-1	DAFWA8388	0	56	AATTCAAGGAGTCATGACTAATTTTTTAAAGATTCGTGATAGAGTTGAGGTTTAA[A/T]TTTTTTGTTGTGGTCCAGCAACGCAACTTTCTGGTG	scaffold97513:2348	7681
SLG-1	DAFWA8744	0	48	AATTCTACTATGATCTCTGCAAGAAGTTTCCAAATTTTCATCCTTGA[G/A]GATAAGAATGCTTTCAAGAGGAGAGCAGTGATAGAGTTTAAAAT	scaffold62320:4086	8542
SLG-1	DAFWA6310	0	81	AATTCAATACATTCAAGTTATTACTCGTGGTTGAGTTTTGATTCTTTATGATGTTCTTAATGCAGTTTTAGCTTGATTAT[G/C]TTAAACTTGAT
SLG-1	iDAFWA835	0	74	AATTCTGCTGCAGCCTCCACTGCTGCTTCCAACCCAATCTGATTACTCAATCTGAAAAACACCGAAAAACGAAACAAAAGATCAGATAAGAC-AATTCTGCTGCAGCCTCCACTGCTGCTTCCAACCCAATCTGATTACTCAATCTAAAAAACGCCGAAAAACGAAAAAAAGATCAGATAAGACT	scaffold5813:3829-C-i1	19892
SLG-1	iDAFWA607	0	57	AATTCATGATCAATATTTAGCTGAAATACATCAACTAAATGGTTCCCTTCTCTATGGTATGTCTCAATTGTACGGTCTAGGTCTAAAAATAA-AATTCATGATCAATATTTAGCTGAAATACATCAACTAAATGGTTCCCTTCTCTATGGGTATGTCTCAATTGTATGGTCTAGGTCTAAAAATA	scaffold74025:37583-G-d1	48741
SLG-1	iDAFWA326	0	70	AATTCAGATATCCAATATCGCTTATTCAAATGAGTGTTGTTGAAACTCTATTGCATTTCAATATGAAACTGACATTAAACAACACTTGTTCA-AATTCAGATATCCAATATCGCTTATTCAAATGAGTGTTGTTGAAACTCTATTGCATTTCAATATGAAACTATGACATTAAACAACACTTGTT	scaffold47923:8389-AT-d2	13405
SLG-1	DAFWA1685	1.453	30	AATTCGAATTTTTTTGCAAGGATCACGGT[A/G]TTGTGAGACATTATACCGTGAGGCACACTCCACAACAAAATGGACATGCAGAACGAATGAAC	scaffold8373:15647	36924
SLG-1	DAFWA5081	0	41	AATTCATACAATTATTTTATGCCACATAGTTTCTCCTTAT[T/A]CTTTCTACCAAAGATGATTCTTAAGAAACCATATGAAAGTTGCTCTTAGTT	scaffold26020:2835	8611
SLG-1	DAFWA938	0	85	AATTCCTTGTTTCCAAATGTAAGCTTCGATTTAAGTTTAGGAAGAGAATCTAGCATGCCAACAAAACAAAGTGGAATAGTAATA[G/A]AAAAGAA	scaffold26020:2956	8611
SLG-1	DAFWA2617	0	91	AATTCCTTGGGAACAAGTTAATTGATTAAATGAGCAGTTAATCGATTAAGGTGGTTACTATTTATGTTTTATGTTATTTTCAAGAAACCC[G/A]T	scaffold12473:14742	15277
SLG-1	DAFWA7107	0	9	AATTCAAA[A/G]ACTTGTGTCAGATGAAATTCTTAACCCTTTAGATTTATCAGACTTTGAGGTATGTGTTGAGTACATAAAGGGAAAACAGACAA
SLG-1	DAFWA3292	0	21	AATTCCTTATGATTGGTGAA[A/G]TATCAATCCTAGGATCTTAAATCTCATGATTCTCACACACATATATGAAACAAAGGGTGCAGTGTCATACC
SLG-1	DAFWA8057	0	81	AATTCATCAGAGTCCCACCCCACCTGCAAAAGGTACATTCACATGTGAGTGGTCAATAAATGCATTAAATTACCAATAAG[A/G]AGAGTGAAATG	scaffold20527:12430	16163
SLG-1	iDAFWA569	0.718	59	AATTCAGTTTAGCAGGAGTCCAGGGAAGACTGGTTCTCACTTTCACCCGGACAGTGACTGTTTGTTCCAAATGAAAGAAATGATATTATTAC-AATTCAGTTTAGCAGGAGTCCAGGGAAGACTGGTTCTCACTTTCACCCAGACAGTGACTTGTTTGTTCCAAATGAAAGAAATGATATTATTA	scaffold45064:2849-T-d1	14077
SLG-1	iDAFWA161	0.717	22	AATTCATTTTTTCCATAAAAAACTTCAATATTTAAGCACAAAACATTTAGAGCAAAAAGCTTGAAGTACTCATGTAATATAAGGTAGTGCAT-AATTCATTTTTTCCATAAAAAAACTTCAATATTTAAGCACAAAACATTTAGAGCAAAAAGCTTGAAGTACTCATGTAATATAAGGTAGTGCA	scaffold92741:1386-A-d1	1836
SLG-1	iDAFWA491	0	45	AATTCTACCATCTACTACCAACCCAAAACCAGTCCATTCATGATGGGGAGGTGACATTTTCTGCCCCAGAAGTATATCACTCAATGTGCTAT-AATTCTACCATCTACTACCAACCCAAAACCAGTCCATTCATGATGATTCATGATGGGGAGGTGACATTTTCTGCCACAGAAGTATATCACTC	C28737200:5015-ATTCATGATG-d10	6154
SLG-1	DAFWA1303	0	51	AATTCTTTAGGTGCAATTTCTCACCACTGTTAGATATAAGTGATAATGCA[T/C]AAAAATGGAATAATACTAAGTGTACACTTAACATACAATAT	C28744854:1027	7550
SLG-1	DAFWA3883	0	85	AATTCAAATACACTAACTTCAGTTTCAAAACTAAAATCTCGTTAAGATACTCGGCTATGCTAGTCTTTGTCAACATTCTGTCGT[G/A]AGCTGTA	scaffold24002:28438	32318
SLG-1	DAFWA4869	0	39	AATTCATTACTCCATAAATCGAGTGGTACTTTGCGTAT[T/C]CCAATGAATAACCGAGTGGTACTTTGCGTATTCCAATGAATAACCGAGTGGTA	scaffold96450:3064	3574
SLG-1	DAFWA4561	0	26	AATTCAAATTAGATATATATTCCAC[G/A]TATCAAAAAATGGGTAGTGGTCTAATCAGAGAAAGCAGATATGATTATACAAAAAATATTAAAAAA	scaffold90118:2768	3494
SLG-1	DAFWA1323	0	67	AATTCAATTTATTCCATTTATTTATTTATTTTGCTGACTCAATTAATGCCTCTTTTGAAGAGGAAG[G/A]AGGAAAAATAATAATTTAATCATTG	scaffold24002:32082	32318
SLG-1	DAFWA7854	0.718	37	AATTCCAAACTCAAGACCCTTTGCACATAAACATCA[G/C]AAATTAAATAACAATGCTAAAGAAACAAAAAGAAAGATTTCAGGGTCTAATAATA	scaffold24002:10092	32318
SLG-1	DAFWA2311	0	24	AATTCACATAATAAATATATGTA[T/G]ATTTTTGTTTCATGACATTTGAAATAAGATGATAGTTGGTCTGATGGTTGTATCTCTTGGCAACAAAG	scaffold24002:25380	32318
SLG-1	DAFWA3306	2.98	69	AATTCTAGGAATTGTAAGTAATTCGAAGAATTAGAGTGTGAAATTCAGGGGATTCCTATAGAAATGGA[G/A]GATCTCGAGTGTATATTATTCAA	scaffold69213:1325	10416
SLG-1	DAFWA8070	0	10	AATTCTTTT[G/C]TTCCACCCCTTCCTCGAAATCTATTTCTTCCACCAAAGCTCCTTTTATCTATGAAGTGAGCTTGTAAAGCCTGATCAATATG	scaffold84285:14226	15871
SLG-1	DAFWA1339	0	36	AATTCTTTGATTTTTTTATTAATTATTAATTTGGC[C/G]AGCATTTAATTATATATAATATTCATTCAAATAACATTATTGAGACATTATGGGTT	scaffold84285:8681	15871
SLG-1	DAFWA1489	0	81	AATTCATGAGTGAGGAAAAGGTTAATTGGGAAGGAAGGTGTTAGATAGTGATGATAAATATTTGAGATTGAAGCATGATG[A/G]GGAATGAAAGA	scaffold91916:1716	6144
SLG-1	DAFWA3125	0	90	AATTCTGGGCTTTTTACATGAACCAACATTCAAAGCCATCAACAAGACGTTGGCACTTTGTTGGAACACTCTTCAGTATTCTGTTTTTG[C/T]TG	scaffold33456:21774	22400
SLG-1	DAFWA1342	0	76	AATTCTGTGATGGGGATTTAAGTACAACAAGGTGAAAATATGTGTCAATGTTATGTAAAACACTTGATATTATGA[T/C]AATGAATGCCCCCTCC	scaffold69213:3714	10416
SLG-1	DAFWA729	2.979	44	AATTCCATTTAGAAAATTCAACGAGACTTTCTTTGGGGTGGGT[T/C]TGAGAAAAAAACGAAAATAAGTTGGGATAAACGGGAAACTGTGTGCAA	scaffold18874:2738	8974
SLG-1	DAFWA1962	0	23	AATTCCCAACCCAAGTCCACCC[T/C]TCTTCCTCGGACAGTGAACCCAGAGAAAAGTTGCTGCAAATAATATCTTTCTCCTATGCAGGAACCATA	scaffold14015:11468	14944
SLG-1	DAFWA8493	0	66	AATTCAAGTAATGCCATTTTGTATCTAGGATTCAAAACTGTAGCAACTCCTATAATATCATGAAT[A/G]CACTCCAATACCTTACAAATTTAGCC	scaffold20379:965	8747
SLG-1	DAFWA6320	0	65	AATTCCTGGGCTTAAGAAGCATTTCTTTACATGTTTCTGTCCAAAAATGCTTAACATCAAGATT[A/G]GCTACGCTTTCATACAACTTGTTCAGG	scaffold44536:8346	9184
SLG-1	DAFWA6456	0	42	AATTCATCGTAAGATAGGGCCGAGGTAATTATATTTTTGGC[A/G]CGAAGGTTGTACTGAGCCTTCTTGCGCTACTCATCGGTCCATAAGCTTTT
SLG-1	DAFWA4295	0	69	AATTCAAGAGTGAGAGTCATAGGGTTTGATTAGTTTCTCCTTCTTGTATTCAGTATTTTGCTTCTATT[C/T]TAAGTCTAGGTCTCCTGTTGCCT	scaffold24425:27885	44424
SLG-1	DAFWA3238	0	62	AATTCACAAAACAAGACTAGTACTTAACTACGGTTTAGCCTAATTGATTACTGATTAATTT[C/T]TAAAATTAATTTTTTTAAAATAAATAATTA	scaffold22631:4762	4804
SLG-1	DAFWA4788	0	72	AATTCCAATGGTCAAACTTTGCTTAAATATTGTAATTATTATAGTAATAAAGATATAGTTGTATGACTTTT[G/C]CAAAGGTGCATTTGGGGTAG	scaffold18874:5935	8974
SLG-1	DAFWA5516	0	33	AATTCAACACAAAAATCAAATAAATAATCAAT[G/A]TAGTCTCATACTCACATATTTGGTTTACACAAAAATATTTAGCTTATACTTAATTTTCT	scaffold47532:5806	10325
SLG-1	DAFWA3070	1.453	25	AATTCATGTTCCTAGATGACCCCA[T/G]AAATAAATAGTTAATATCATTGTATCAAATATATGATGCTCACCTTAATTAGAAATCATAAATTTCT	scaffold74446:1262	1453
SLG-1	DAFWA4708	0	25	AATTCAAGTTTTTTATACCACAAG[C/G]ATGCTTCCCTTTTGTAGTTTTGTTCTTTTCCATTGTTCAATTGGGATTAGACCAGCATTGTATTGAA	scaffold89473:11954	12935
SLG-1	DAFWA5896	0	44	AATTCATATTGTAATAGCAGCATGGTTATTTTTATACTCTCAA[C/T]TGTTCATGGTTTTACTGATTGCTGATCAGGTTGGAATAAGCACAAGCC	scaffold89473:5610	12935
SLG-1	DAFWA7394	0	8	AATTCCC[A/G]ACATGTAAAGGAAACACAACTTCCATCCATGCTAATTTATCCGGCTACTATTTTATATTGCTTTCACATGTAGGCAAAATAGCT	scaffold74446:1136	1453
SLG-1	DAFWA3173	0	81	AATTCCTTATGATTGGTGAAATACCAATCCTAGGATCTTGAATCTCATGATTCTCACACACATATATGAATGAAACAAAG[A/G]CCGCAGTGTCA	scaffold40846:12063	13380
SLG-1	DAFWA5273	0	40	AATTCTCGTTTGTAATTGTAAGCACAAAGTAGGAAACCT[C/A]TATGTGTATATATATTACCAGAATGACCAAGAACAGGAATCTTGGTTGTGTC	scaffold89473:8499	12935
SLG-1	DAFWA2792	0	24	AATTCAATTAGGTAGTCTTGTTC[A/G]TATTATATTGAAGTTTTTGGTTTCAGGTACTAAGTTCTGAAGAAAGGAGTCAAATATTGCTGGCAGTG	scaffold89473:9879	12935
SLG-1	DAFWA2200	0	76	AATTCAGGATGAGTAATAAAAAAATAGTTTTATATTTGAAAATGACACATTTAATATACAAAATAATGAAAAAAA[A/T]TATTCCATCACATGTT	scaffold61864:421	1240
SLG-1	DAFWA5742	0	26	AATTCCGTAAAATTGTCTTTTTTTT[A/T]CATGCAGATGGGATATGTCATGTATATGTTGACAAATCAGCTAATATTGATATAGCAAAGAAGATT	scaffold89473:8438	12935
SLG-1	DAFWA2557	3.773	84	AATTCAAATCCAATATTATGAAGCCTAATAGTTGTGTTAACCTAATTCTCCTTGTTACTATTTAGTGTAAGGAGGAGCACCTG[T/C]AATGATTT	scaffold67211:722	16820
SLG-1	DAFWA7904	0	69	AATTCGAAATTTTGTTAACCGAAATTTAAGGATTGAGTGGTTGAAAGTTCACTATAAATAGAATCTGC[G/T]ATGAACATAAATGGTTTACACTG	scaffold74978:464	553
SLG-1	DAFWA1206	0	27	AATTCAATTGTGCTTAATAGAGAGAA[C/T]TTTGTGCCTATGATTAACGGAGAATACATGTGATTTAGAAGAAAAAAAGATATTATATATAATAT	scaffold96297:1126	1597
SLG-1	iDAFWA365	0	64	AATTCACATCAGGGATTTATAGAGTAGTTTCAATGGTTTAGGGATTAATATGACTGACATTGTACATTGTAATATTGTATACTTTAAGGACT-AATTCACATCAGGGATTTATAGAGTAGTTTCAATGGTTTAGGGATTAATATGACTGACATTGTAATATTGTATACTTTAAGGACTAATTTTG	scaffold67211:16549-CATTGTA-i7	16820
SLG-1	iDAFWA680	0.718	18	AATTCCATTCCCTTTTTTTCTCTTTTATTCATCTTATCAGAATAAGAACAATGGTTAATTGCATCCTTTTTAATTATTTGATTTTGTTTTAT-AATTCCATTCCCTTTTTTCTCTTTTATTCATCTTCTCAGAATAAGAACAATGGTTAATTGCATCCTTTTTAATTATTTGATTTTGTTTTATT	scaffold54927:16093-T-i1	34039
SLG-1	iDAFWA847	0	49	AATTCCAAGTTCGTGGAGCTAAGGCAACACAACTATCTCCCACATTCATCTAGTAAAGATCTTCACCCTTCATCAACATTATCAAAATGCAA-AATTCCAAGTTCGTGGAGCTAAGGCAACACAATTATCTCCCACATTCATTAGTAAAGATCTTCACCCTTCATTAACATTATCAAAATGCAAG	scaffold95567:5258-C-i1	5714
SLG-1	DAFWA930	0	85	AATTCCGAAATTTGAGTGATTGAAGATTTGAGATTCAGATTTTGTTAGTGTGAAAGGAAAACGAGGGAATCGCATTTTGAATAG[T/A]ACTTGTT	scaffold24579:24743	41182
SLG-1	DAFWA4507	0	91	AATTCAACAATCAAAGTGACTAAAATTGGTTCTAAGGTATCTAAATAATTAAAAATTGTGTTTTATTAGTTATTAATTTATTTTACAAAA[A/T]T	scaffold78639:740	3377
SLG-1	DAFWA5189	0	81	AATTCTCTTTCCATTGATGAACATTCTAGTATTGATTTATTTTCTAATCGACGATTATTTCAATGATGATTATATCAATA[G/A]ATTTCACGGTT	scaffold54927:14589	34039
SLG-1	DAFWA4950	0	33	AATTCTTAATCAGAGCAGTTGTAAACCTTTGT[A/C]TTACAAAAATCATAGGTTGTGATAGTTTAGATTATTGCCAATTCCCTAAGATATAAGAA	scaffold78639:621	3377
SLG-1	DAFWA1764	0	21	AATTCAAACACATGTTTTCA[G/A]CACAATCAAATATCTAAGACTCTCGTCATGAAGAAGATTAAGGACTCTTACATAGAAACCAAGTTTCCATG	scaffold54927:24309	34039
SLG-1	DAFWA3054	0.071	14	AATTCTGTCGTAA[G/C]GTATTCATTAAACACATGTCCATGCAAGTCTTGCTTTGTCTTTATACATATTATGGAACTTGGGGGGAAAATGAAGTT	scaffold24579:16604	41182
SLG-1	DAFWA665	1.535	57	AATTCAATTCCGAGCTACGGAACTCAAAAACACGTTATTGAGCCGAATTCGGGTCC[G/A]ACAACAATCCAAAATCTTTCCTTCATAGAAAATTA	scaffold25978:9449	15931
SLG-1	DAFWA3529	0.472	91	AATTCTTAATTTGCATGCATAACCTTAAAAATTAAAAGTTGTCGATGAAGATAAAAGAAAAATCCCTATCAGTCCAACCAATCAAATTTC[G/A]T
SLG-1	DAFWA1469	1.535	28	AATTCTAAATGGATTTGAATTTTCACT[T/C]GAGTTTTCAAGAAAATTCTAAATCTTTTCTTAATCCTTGGACCTTAGGTGGACTTTTTACCTAT	scaffold24925:4665	35142
SLG-1	DAFWA346	2.237	46	AATTCAACAGCCACATGCAATTCCAGCACTTTATTATTCTGGTCA[G/T]ATATAAAATAATATATTAGTATACATGAAATTTATGTGTAGAGTTG	scaffold7821:20252	37793
SLG-1	DAFWA4706	0.718	83	AATTCATATGTAGCTATTAAATCATTTCCGAAATAATGAGGTAGATAATATAAATCTTATTTCTCAAAAATGGCATTCCTTT[T/A]GAGGTCAAT	scaffold78200:679	1400
SLG-1	DAFWA6806	0	9	AATTCTCT[G/T]TGTATATATAAGTGAGATTTTTCTTTGCTTTTGGGTGTGGGCTAATTGTATAAATTGACTCCAAATAATGTATCTATTAATGC	scaffold69333:27917	40614
SLG-1	DAFWA2036	0	44	AATTCTTGTGGGTGTGAATCATCATCATGGTGCAACTTGGAAA[C/G]CTCTTATCGATAGGATTCGAACCAGACTTTCTTCATGGAATTTGAATC	scaffold62486:25673	31584
SLG-1	DAFWA95	0	68	AATTCAATATCTAATAAAATATAGTAAAACAAAGAAAGGTTCATCCATAGCATTGCTTAGGAATGCT[A/T]TAACTCAAAATGCTTGATATTTCC	scaffold69333:24785	40614
SLG-1	DAFWA2258	2.207	57	AATTCTCAAAACAGTTTTTATAAGATAAGAAAAACTCAACATTTTCATTATGACTA[A/T]ATGAAAAGCATAACCACTAATTTACCAAATTACAT	scaffold29021:1273	20578
SLG-1	DAFWA2948	1.453	47	AATTCCATTGCAAAAACAACTTCCCTAACTTGTTCTGTCAAATCAA[C/A]TCCATTTATATTATGCAAGTTCTTAATATTGTATCAACATGTAAC	scaffold80828:11297	28433
SLG-1	DAFWA6194	0	68	AATTCATAGACCTAATCTCTTAAATATTTGGGTAAAGATGTGTAGTGTGAAATTCACTTATATGTTT[A/C]TTTCGCTTATCCCATGAATAAAGA	scaffold80828:1158	28433
SLG-1	DAFWA5808	0	17	AATTCTACCTACTTGG[A/G]TACTTCCTTCATGGATTTGTATCACCTTTTAAGACCAGTTTGAGTATGTCCCCAACAACATCATGTGCTCTGCTA	scaffold80828:12284	28433
SLG-1	iDAFWA516	1.453	72	AATTCAAGATCCAAACAAGAAAAAGAGTTTACCAAAACTAAAGTTGATGGAAGGTTTAGATTAGCAAAAAAAAGAAGGAATTTCTCACTACT-AATTCAAGATCCAAACAAGAAAAAGAGTTTACCAAAACCAAAGTTGATGGAAGGTTTAGATTAGCAAAAAAAGAAGGAATTTCTCACTACTT	scaffold69346:19142-A-i1	32044
SLG-1	DAFWA6843	0	51	AATTCTGGTGCAAGAACATTTAGAAGGTGAGCATAAGCCTCTGCATCCTG[T/C]AGTTACAGAACCATACATGATCAAAAACTGCCTATTACACG	scaffold69346:8128	32044
SLG-1	DAFWA8306	0	84	AATTCAATAATTGCTCAATAGATGTGAGTCAATGTTGAAATCATTCTAGCAAGTAGGAATGGCAGTGACAAGATTCTCGATTT[T/C]GGGATAGT	scaffold69346:8814	32044
SLG-1	DAFWA1125	0	29	AATTCACTAATCCGTCCACATTAGTAGT[C/A]AAAAATCCTTTTGAACGAGCAAAGTTAGTTCTCGAACATGCCGATAAGATGGGTTGCAAGCGA	scaffold69346:8203	32044
SLG-1	iDAFWA288	0.328	30	AATTCAAATGTTTTATGTATTCCATTCCTTTTAATAAAGAAATTCCACCAAATTGAGTAATATTTGGTGTATTTGATTTTAAATAAATTGAT-AATTCAAATGTTTTATGTATTCCATTCCTTAAAGAAATTCCACCAAATTGAGTAATATTTGGTGTATTTGATTTTAAATAAATTGATTGTTT	scaffold74673:1605-TTAAT-i5	5547
SLG-1	DAFWA6656	0.536	76	AATTCATCGTATTCTTAGTCTTATTATTTAATATGTGTGTAAAGTAAGTTTAAATTGCACTATGTAACTGCAATT[A/G]TAATTACAATATTACG	scaffold84763:3800	11223
SLG-1	DAFWA2867	0	89	AATTCAATCTTAAAAAACATATGTGGAATTATTTATGTTGTTGAGTAAGTGAAAAGTAAAAGAATTAATGTATAAGATTATTTATTTA[A/T]AAT	scaffold84763:8347	11223
SLG-1	DAFWA2395	0.959	82	AATTCTAAGTTAATAATTGATTAAGGTTGAGAGAAGATAGAGTCTCACAGTTGATTTTAAGGTATATGTTCTTTTTGAGTT[T/C]TTTTAATTTG	scaffold84334:8101	15367
SLG-1	DAFWA3790	0	15	AATTCCTATTAAAT[A/T]CTAGCTGCTTGAATTTTGAAATTTCAATAATAACTTAATCATGTAATCATCAAAAAATCGTATATTAATGAATGGAT	scaffold81553:1346	3405
SLG-1	DAFWA7931	0	38	AATTCATCGCCGTCGCATCCGGTGGCGTTCTCCGCCA[C/A]ATCGGAGTAGAATCCGACGAGCATCCACTAGTTGACGTTGTCTGGTTACACTCA	scaffold89557:906	13243
SLG-1	DAFWA1918	0	36	AATTCATTTACTTAGATTCCTAAGGAATTTGGTTG[C/T]TTTATTAGTTTGTGGAAGCACAAGAAATTGAAGGGTGCTGTTAGAACTCAGTACAA	scaffold69951:11659	11980
SLG-1	DAFWA2737	0	16	AATTCATATTCTGTG[T/A]ATGATGTAAGATAAATGACCTAGGATGAAACCTGTAGACTTTAGTGCATAAGAGATACCGGGAGAGAAAAGAAAGG	scaffold81553:1320	3405
SLG-1	DAFWA2634	1.186	47	AATTCACCTCCACTCCTTCCTCCACCATCAACCTAACATACTCCAA[C/T]GCATCCCTCTCCAACCTATTATGCACAAAACCCGCAACCATAGCT	scaffold90969:7761	9086
SLG-1	DAFWA2902	5.205	41	AATTCAAAAGGGAACCTTGAAAATTGAGAGAGATAGAAGG[G/A]GAAGGTGTAAGAAGAAGAGAATTACAGCATTGAAGGAAGGGAGAGAAGAGA	scaffold99166:782	23316
SLG-1	DAFWA5439	0	10	AATTCTCTC[G/A]TTTTCTTTTCTTATGATCCTAAGTCGTCTTTGAAGGGTTTCGACTTAGAATCACTTTCATTTCCTAGGTTGTTCATGTGAGT	scaffold99166:22071	23316
SLG-1	DAFWA6100	0	80	AATTCTAGCATTTATACCAAGCATACTGATACTATTGTTAACCGATAATTCATCTACTTAATCGATTAACGGGCTGTTA[G/A]AAATTGGTTTTT	scaffold11324:35587	38157
SLG-1	DAFWA1044	0	19	AATTCTTAATTTTTTTGG[A/G]AACATGATTTATTAATGTAATATTTATGTATCGATAATGTAATATTTATATATATTCATTACATCAATTATTA	scaffold11324:14039	38157
SLG-1	DAFWA4718	0	76	AATTCCAGCTTTCACCATACAACCACCAGATAATAGATAATACCAGAAGACAGTTACAGAAGGGATAAATGAAAA[G/C]TTCTACATATTCAGTG	scaffold11324:31321	38157
SLG-1	DAFWA8519	0	38	AATTCTGTCCCAATAGTAGCAACGGATTGTGTCAACG[G/A]CAACGGCGTTTCGTCGCCGAATAGCACATTGTCGAGCTTAAGTGTCTGCAAGCA	scaffold38061:12357	24513
SLG-1	DAFWA5290	0.79	50	AATTCACGGTTAACGATATAAATATTGTTGATGATTTATAAAACAAAGT[T/G]TCGTTTGGTGTAACGGTTGTGTATATTTGCCATGAGTTCGTG	scaffold81961:6486	8181
SLG-1	DAFWA3344	0	76	AATTCTATTGTTATTGGCTAAGATGTATGGGTGAGGTTCATCATATTTTTGTGGAGATGAGATGTTACAAACCCA[C/T]AAAAAGCCTCAATCAA	scaffold74893:2517	9439
SLG-1	iDAFWA814	0	52	AATTCTCTCAACTAAAACACAAATAGATTTTTATCCAAAATTAACTTGTTTTATTAATGAAGAGTGCCATACATAAATAGGAAACTTAGTTT-AATTCTCTCAACTAAAACACAAATAGATTTTTATACAAAATTAACTTGTTTTCATTAATGAAGAATGCCATACATAAATAGGAAACTTAGTT	scaffold38061:16270-C-d1	24513
SLG-1	DAFWA5420	0.718	74	AATTCCTCATTAAGGAAATGTGAGGGGAGGGACCAATGTATTGATTTTTAAATTTAATTTAAAAAATAATCTG[A/G]TTCTTTAATTTTTTTCAT	scaffold68720:7303	12028
SLG-1	DAFWA2017	0	58	AATTCATTGAAGAATTTGAAGTGCATTACTTCTTCCCGTGCTTTCCAATTGGTTAGA[A/G]ATCAGATAGAAAAATCAAAATCCGGAGTTCTTGA	scaffold34618:8246	25792
SLG-1	DAFWA1796	0	57	AATTCTAGCTCTTTCTTGTTATTGTTCCATCTATATCGTTGTGTTGAAATACTATA[G/T]TTCATTTTATGATAATCATTTCTTATTTGGTTGTT	scaffold68720:6152	12028
SLG-1	iDAFWA132	0	64	AATTCAGTATAGGTGAGAAACCTATCTCCTTAATTTCCATGCAAATAAAAAGATTAAAAAAAAACAACTTTGTTACTCACCATGTTACCCTA-AATTCAGTATAGGTGAGAAACCTATCTCCTTAATTTCCATGCAAATAAAAAGATTAAAAAAAAAACAACTTTGTTACTCACCATGTTACCCT	scaffold68720:7168-A-d1	12028
SLG-1	DAFWA7200	4.145	71	AATTCTAATTCTAATAGATAGGAGTAATGGAGCACAAATCAATGTTATCATATTGGAAAAAGGTTATCAT[C/A]GGAAGTTGGTCAAGTGGTACA	scaffold79685:351	23021
SLG-1	DAFWA5162	0	49	AATTCAACACAGCGGAAAAGACAAACTCAGTCAAGGTGGCTGGCATCT[C/G]TCTACCATGTTGAGGAATTATAGGATTAGGATCGAGGAAAAAA	scaffold79685:5330	23021
SLG-1	iDAFWA379	4.21	48	AATTCAAGCATGCTTTTTGTGGCCTTAAATGTTGTTATTGCGTCCCAATAAAATGTCGATCACACGAATCGAATCTTTGATATTTGACTAAA-AATTCAAGCATGCTTTTTGTGGCCTTAAATGTTGTTATTGCGTCCCAAATAAAATGTCGATCACACGAATCGAATCTTTGATATTTGACTAA	scaffold76214:13025-A-d1	15386
SLG-1	DAFWA3845	0	56	AATTCAAATCCCTTATATATATTATATAAAAAGATAAAAAGGGATAAAAGTATGA[G/A]ATATAAAAGGGAAATAGAGAGAGAAAATGCATTGAA	scaffold76214:9382	15386
SLG-1	DAFWA8650	3.773	70	AATTCACTGCTTATCAATGCGCCTTACCATAGATTACTACCTCCTTGCTCCGGAAAAGAGAAAGTTCCC[G/A]ATGAGTGAGAATTTGGAGAATC	scaffold71636:8859	12637
SLG-1	DAFWA7826	0	34	AATTCCATTCTTATTTCGAATTTCATCTTGTGC[G/A]TTCTTCCTTCTATACATACAATTTCCTATGAGTGCAACTATGTCTCGCCTAAAGCCCT	scaffold98691:6473	11458
SLG-1	DAFWA8074	0	13	AATTCTACTGCT[C/A]TTGCAGCAGTGTGTTACAGATGACGATAACCCTTTCCTGAGAGAATGGGGCATATGGAGTGTGAGGAATATGTTGGAGG	scaffold98691:6515	11458
SLG-1	DAFWA2590	0	8	AATTCTG[G/C]CTCAACTTTGTAAATTGGTGGTCAGAGTACTCATGGAAACAGCCTCTCCATTAATGGGGGTTAGGTTACATATGTATAACCATC	scaffold71636:7208	12637
SLG-1	DAFWA8843	0	76	AATTCCCTTTTTTGTCATTGGGTTATTTCTTATTATCTGTCAGTACCAGTTCTATTAATCTATCTGCAATTATAT[G/C]GCTTTGTCTGCATTTG	scaffold71636:8555	12637
SLG-1	DAFWA7680	0	81	AATTCTCTGGTAGCAATGTATGCAAAATGTGGATGCTTGGATGATGCTGATAGCATTTTTGTTTCAATGCATGTTCGGGA[T/C]GTAATTACTTG	scaffold91713:17736	22766
SLG-1	iDAFWA628	0	42	AATTCATATGCCCCAGTTGTTTACCCTTTTGTTTTAAACCTTAGATTAGAAAAAGGTGCATTTTTTTATGGTGGGGTTTGCAAATTTTGATT-AATTCATATGCCCCAGTTGTTTACCCTTTTGTTTTAAACCTTGAGATTAGAAAAAGGTACATTTTTTTATGGTGGGGTTTGCAAATTTTGAT	scaffold91713:5840-G-d1	22766
SLG-1	DAFWA3159	1.461	91	AATTCCTTAATTTTATGGAAATAAAATCAGAAAGGTAAATATATGATATGATTTGATAATCATATATTAGTCCTATTCAGATATAGAATC[T/C]T	scaffold70418:14917	20219
SLG-2	DAFWA7882	#	16	AATTCCTACCTTTTT[G/T]ATTTCGCAAAAGAGTTATATGTTATCTTTGATTGTTCTCTTTTGTAGTAACTACCACAGTAGGATAGAGGATGTGA	scaffold89799:16672	20267
SLG-2	DAFWA3975	0	78	AATTCACTCAGAAACACGTTCACAAAAGTAGGTTGTTTCTACCTACTAGAAGCACCATACAGCCAGCACAAGGTGCC[A/G]CCTAAGTAGGGTTT	scaffold8099:13550	18285
SLG-2	DAFWA2476	0	88	AATTCTTAACATACAAGAACCCGCCATGATTTCAAAGGATATAAACAAGTGGAGACAAAAGTCATAAATATAGTACTTGCATGGGTA[T/C]GCTG
SLG-2	DAFWA7139	0.732	64	AATTCAACATTACATCTTTAGGTTTCAAATGTTGTGCCAAGAAATCGCCGCTTTACGTTTGTT[C/T]CTATTCTTCCACACATCGCTGTTCCTCT	scaffold96637:11149	35593
SLG-2	DAFWA6331	0	27	AATTCAGTCAAGCTGTGATCAATATT[G/A]CCAACTTGATTTAAGCAATCAACAGAAAATAATAGGAAAATAGAATGATTGATGAATCCTATTAC	scaffold89826:1209	16276
SLG-2	DAFWA6042	0	36	AATTCTGGGTTTTCTGCCATAGAATGAAACAAAAC[G/T]TTTGTATGAATGTAGGACAATAGGAGTATCGAAGTTCAAATCTGAATAGGTATTAG	scaffold96637:19994	35593
SLG-2	DAFWA8064	0	45	AATTCTCTTTGATTCTATTCTCTTCCGACACAAACAACAATGGA[T/C]GAATCGAAACACCTTCTCAAACTTCAATGTTCTGTCATGAATTACGA	scaffold96637:28432	35593
SLG-2	DAFWA7065	0	66	AATTCCAGCATCACCGCAGTTGCTTCAACTCCTTTCGTAGAAGTGTATATAGAAGGAGCTTATAA[A/G]TATAACTACTTCCCAAACATGACTTG	scaffold96637:14908	35593
SLG-2	DAFWA5751	0	36	AATTCAGCCAACAAAAAAATCATTTGTGTACTATC[G/C]ATTGATATACTAGTAATGTCAAAGGATCCTAACCCTATATGGAGGGGGGAGGATTG	scaffold69451:9587	11916
SLG-2	DAFWA4705	0	44	AATTCGGGATAAGCTATGTCTGATAAGATATGTCACAATCTTG[C/T]GTCATCAACTTTTTTTGGTCGAATTTTGTATCTAATAAATAGATATAA	scaffold96637:1181	35593
SLG-2	iDAFWA203	0.725	64	AATTCAATGTTTTTGCTCCACATACTCACAAATGCAGTGTTCAGAAGAGTGTATTGTTGTATCATCAGATTAGAGACTTTAGATTTTAGAAT-AATTCAATGTTTTTGCTCCACATACTCACAAATGCAGTGTTCAGAAGAGTGTATTGTTGTATCAGATTAGAGACTTTAGATTTTAGAATCCA	scaffold89379:681-TCA-i3	12835
SLG-2	DAFWA2015	0.4	47	AATTCTGAGAAGTAATGCATGCATGTCTAAGACGTGTATCACACGG[A/C]AACTCTCGTAAGAGTTCTTCTGCTCATTGACAATTGACAAGATAA	scaffold89379:6182	12835
SLG-2	DAFWA6014	0.335	53	AATTCATTTATTAAATCAGCTGCTTGAAATCAAATGAACTGCTATAACTCAA[A/T]GCACAAAGCATGTCTACATTAACTTAATTTCCTCATACC	scaffold98649:7815	8724
SLG-2	DAFWA7837	0	30	AATTCAAGACTGTTTGAGCACTAGAGAAG[T/C]ATACACCATTTTTGTTGTATATTAACAATAAAATGAATTGATAGTTGAAGTTAGCTCCAAAT	scaffold98823:7140	11708
SLG-2	DAFWA8240	0	92	AATTCTGAACCACAACTTTCACCACTTCACATTTTCATTTTTCACATTACTAGCCTCCATGCACCACAGTTCAGGTATGACCAATGGCCCT[A/T]	scaffold98823:4185	11708
SLG-2	DAFWA7241	0	55	AATTCTAAGCTGAAATGGAAAATCAATAAGGAGATAGTCACAAAGACTGGTGCA[T/C]ATCGGTTGTCCTACAGTCCAAGTCCATGTGCCATGAA	scaffold98823:4043	11708
SLG-2	iDAFWA555	1.453	29	AATTCACTCATAATTCATATATATATATATATAGTTTTTATTTTACAGACAATAATAATTAACACATAAATGATCGACAATAAATAATGTGT-AATTCACTCATAATTCACATATATATATAGTTTTTATTTTACAGACAATAATAATTAACACATAAATGATCGACAATAAATAATGTGTTGAC	scaffold64617:7599-TATA-i4	8239
SLG-2	DAFWA1517	0	47	AATTCCCATTTCTGAGAGAGAGAGAATAATGGGTTGTTATTGGAAT[T/C]AAAGGAGAATAATGGGTTGGTGGCAGAACAGCATCGCCGGAGCTC	scaffold93103:19109	20558
SLG-2	DAFWA477	0	33	AATTCTTAGTCATAGTTAATAGGAATCCAGTA[C/T]GGGTATGTGGTTTTCAGTTGTTACAATATTATTACGAGACTTTCTTTGAGGTGAGCTTG	scaffold86614:8292	16053
SLG-2	DAFWA8250	0	50	AATTCACAGCACGATCACTGTATTAAAACATACCAAGTACCAGTCAGTT[C/T]CTGGTGGAAAAAGTAACACTAAAAGCAGAGATACAAATTACA	scaffold93103:6456	20558
SLG-2	DAFWA8620	0	13	AATTCATTGTTT[C/T]TGTTAATTAGAGCAATAAGAATAAGAGATACTTAAAAGATAATAATCATAATAACTAAAGCGTTTAGATTATCAAAAGA	scaffold28008:34288	52702
SLG-2	DAFWA4303	0	45	AATTCCAAAAAACATGGTTTGGATTATGGTTTGGATTTTGGAGG[C/A]CAAAGAATACTATTATTAAGGGTGTAAAGTTTCATTTCAATTCAATT	scaffold93103:14363	20558
SLG-2	DAFWA3297	0	52	AATTCGACGGTGGAGGCTAATTTTGAAGAAAACGGCGTCGTTGAGGATAGA[A/G]GGATGGATTACAGAGTCTGTGTTTCCGTCACCGGTGACCT	scaffold93096:7630	18434
SLG-2	DAFWA1792	0	41	AATTCCATACAAATTACTTAGGTAGATTGTGATAAAAAAA[A/T]ATATAAAGGAATGTGACCTTACACTTGTATATTAGATATTTAATTCGTCCT	scaffold93103:13461	20558
SLG-2	DAFWA4093	0	44	AATTCACATAATCTGGATTCAAGTGGAAAATCGGTAAACTAGT[C/T]TTCATTATATGATATATCAATTAAACTTATTAGTATAAAAAATCAGTT	scaffold93096:4331	18434
SLG-2	iDAFWA302	0	19	AATTCGTGCTTTTCTTTTTTGCTTTGGGAAGTTAATCTTTGCTTGCTCTTATATTTGTCTGGTTGCTGTAGATATGAGAACAATACTCAGCT-AATTCGTGCTTTTCTTTTTGCTTTGGGAAGTTAATCTTTGCTTGCTCTTATATTTGTCTGGTTGCTGTAGATATGAGAACAATACTCAGCTC	scaffold28008:11209-T-i1	52702
SLG-2	iDAFWA560	0	18	AATTCCTAATCTTTTTTAATAATTTGGACTAATCATTTTGTTCTTAATATGTCTTTGTCATTTGATCCAATTTGGTTAGATAAGAACAAATT-AATTCCTAATCTTTTTTATAATTTGGACTAATCATTTTGTTCTTAATATGTCTTTGTCATTTGATCCAATTCGGTTAGATAAGAACAAATTT	scaffold28008:34314-A-i1	52702
SLG-2	DAFWA6933	0.718	86	AATTCTAAAGAAAATCTGGATGATAGTGTCCTTAATAACATGATTCATGTCAGAGATTGTACCCATATATCTACCAACTATGTTG[C/A]GCCATA	scaffold75636:7680	23711
SLG-2	DAFWA7297	0.718	13	AATTCTTGTTTT[T/C]GCTTCAGTCATGGCAACTCTGGGACTGCAAATAATTTTGGAGTCAATGCGTACGCTGATATCCACAGTAAGTTATTTTC	scaffold67143:4457	6304
SLG-2	DAFWA4232	0	18	AATTCTTCTCATACAAG[G/A]GATAATAAAGAAAATCACCTTCTTTTTTATATGGATTAGCTGTTTCCAAAACCGGAATGAACGCTACCGTATTA	scaffold88999:6961	11846
SLG-2	DAFWA5764	0	31	AATTCAAGTCGATAATACCTGTGACTTAAA[T/C]AAAAACATTCCAGAACTTGTTCTTGCTGTACTCAAGATAGCTTTACCTGTTTCTATATCAG	scaffold69415:2335	5027
SLG-2	DAFWA6476	0	6	AATTC[A/T]TTTCTTTACATTATTATAATACTTTATTTAGTTGAACATGTGATTTGGATCTTATGTAGGAGCCACAAATTATTTTTACATTTTCA	scaffold69415:2367	5027
SLG-2	DAFWA7593	0	34	AATTCCACTAGAGGATTTCACTTTCTTCGTTTT[C/G]TGTTCTGAACAAAGCTGAAACCCTTCGAAGTTCAACCGCCATGACCGGTCACCATTGT
SLG-2	DAFWA1891	0.717	50	AATTCATTTTCAGGACCAATCCCTTACAATTTTTTCGACGGCTGCTTTT[C/T]CCTTCATTACATTTCTTTAGCTAGGAATATGTTTGAAGGGTC	scaffold75084:8083	28234
SLG-2	DAFWA2824	0	23	AATTCAAGTATTCGTTTGTTGG[T/C]ATTTGGTAAGCTTTTCACATAGTTGAACATTTACCTAACTTTATTTTTTGGGTGAGATGGCCTAAAAGA	scaffold92542:5961	7122
SLG-2	DAFWA7653	0.718	47	AATTCACTGACATTCCTCTCTCTCCCCTTTGCCATGTCTTGCTAGG[T/C]AATTACAAGAATATCCCCAATGCATATTCATCCACCGCCTTTTCT	scaffold72946:7991	16134
SLG-2	DAFWA7863	0.915	19	AATTCGTTGTTGAATAGG[A/C]GTTGTTGTATATCACTAATTAGCTTTTTAGTTTGCAATGTAGAGGTAAAGAACCACTCTTGCCCCAAATACCT	scaffold81503:5466	7558
SLG-2	DAFWA2318	2.001	12	AATTCAACTTT[C/T]AGATTTGGGATTTGTATAGTTGATACATATTCCAAACCCGATGGAAACGCACCCTAAAACATGTATTATATATATAGGTT	scaffold74477:3881	5207
SLG-2	DAFWA4764	0	90	AATTCAGGTAAAACCTAAACGCAAACCCAATCACATCAAATTTTCCCTATTAAATTCAGTTTGAGTTTGGACGAGTATCCATAAATTCA[A/T]TT	scaffold74477:3784	5207
SLG-2	DAFWA8438	0.82	55	AATTCATGTAATAATAGTGTAAAAAAGCTTTTTAATATTATCGACTTATCATGT[G/A]TCATTTATGTATTGACTCATAGATATGGATATAATAA	scaffold78329:12900	16001
SLG-2	DAFWA7810	0.929	88	AATTCTAAGCAAGTGATGTCAAGATATAAGAAGCATCAAATTTTGAACTCTTATTGCTCTTATAGAATAAGAGTCTTAACTTATCAT[G/T]ACAC	scaffold78329:1531	16001
SLG-2	DAFWA5673	1.729	59	AATTCATTACTATTCTATGGTAGTTTCATGCATGGACAAATTCTTCTTGGTGAGATAG[G/A]TATAGATTATAATTGGAGAAATTTTTGTTCAAA	scaffold69937:9487	25771
SLG-2	DAFWA7954	0	56	AATTCATCAAAATTTGCAATATTTATTTTTTCAATCATTTTGCATGGTTTCTTTT[T/C]ATTCAACCCTCCAAATTCAATGTTATTTTCTTTTCA	scaffold68101:4985	6583
SLG-2	DAFWA266	0	34	AATTCCCACAAAAATTGAAGAGAATGAAAGCAT[A/G]CCAATTGAAAATTGGGAGAATTTGAAGAACCAGAGTTTGTTGATTTGGATCACCGCTT	scaffold68101:5070	6583
SLG-2	DAFWA4889	0.864	49	AATTCAACTGACTCCTCCAGCTCAACCCAACCTCCCCCTTCTTCTTCT[C/T]CTCCTCCTCTTTCCTCATATCATCCAACAATTCTTGAATCTCA	scaffold94362:18353	22506
SLG-2	DAFWA2555	0.718	21	AATTCTCAATGTAGATCAAT[G/A]GTGTTCAAATCTTCAACCAATGTATTCATAATTTTTTTTTCTTGCTACTTTTTTCTGCCACTCACCCATCA	scaffold92624:10428	11117
SLG-2	DAFWA8524	0.717	29	AATTCGTATTCAATTGTAATTTAAAACA[A/T]TGGATACATATAAACCCAAACGATTTGAGCCGAACAAAACCCAACACTGAAGCATGGAAACAC	scaffold56423:7174	38773
SLG-2	DAFWA8734	3.773	30	AATTCAGTAGTTAACAAATTGATAACAGC[A/G]GTTATCTTATCATGTTCACCATTAGCAGCAAGCTGTTTCACTATACCCTCAACCTAATAACA	scaffold75627:959	23513
SLG-2	DAFWA7976	0	29	AATTCATAACCTACTAGGTAGTATCTCA[G/A]ATATGAACCAAAATAAGCATCTGAACCTACTATTTGAAGTTGGCAAAGGCAATTTCAAAACTC	scaffold81138:4163	6107
SLG-2	DAFWA7411	0	35	AATTCGCCGGAAATTTAGCCGGAAAGGTTGTTGT[C/T]GACCGGAATAGGAATGTGAAGGTTTCTAGGGTTCGTGGATTTGTGGTGTTGTTTATG	scaffold83275:12626	13600
SLG-2	DAFWA8779	0	18	AATTCAGCTAAGATCAT[T/C]GCCGCAGTACCGCAATACCTAAGAGCTTGAAATCGAAGAAGAAACAAAAGAGCGAGAAGAAGAGATTTAACAAG	scaffold83275:12674	13600
SLG-2	DAFWA3847	0	21	AATTCCATCAAACATTAGAT[T/A]TTGCACAATGTTGCATTATTTCAATGCTTCTGGAAACAAGTTAAGTGGTGATATATCAAATGAAACATTTG	scaffold56829:3559	13250
SLG-2	DAFWA6448	0	28	AATTCTGCCATTGTAATAATGTGGTTT[A/G]AAGAGTTTTGGTAATATCATTATGACTAGAATTATAGCTACATCGACCACATTAATTTTTGACA	C28630664:734	1664
SLG-2	iDAFWA171	0	61	AATTCAGATCTAAATTTCCTTTCTATTTTTTTTAGTTTCCGTTTTCGTGATGAAAAAAAAAGTACTTGGATGGAATTTTTTATTTTTGAGGG-AATTCAGATCTAAATTTCCTTTCTATTTTTTTTAGTTTCCGTTTTCGTGATGAAAAAAAAAAGTACTTGGATGGAATTTTTTATTTTTGAGG	scaffold75627:524-A-d1	23513
SLG-2	iDAFWA672	0	39	AATTCTGAAACAAATTGCCTTTGGAATTTCATATACCTGCAAGATTTTCTGCAATTCATTGGTATTGAACTCTGCTCAACTTCGTATCGTTT-AATTCTGAAGCAAATTGCCTTTGGAATTTCATATACCTGACAAGATTTTCTGCAATTCATTGGTATTGAACTCTGCTCAACTTCGTATCGTT	scaffold95839:12861-A-d1	15332
SLG-2	DAFWA3396	1.461	89	AATTCTGGAGTTTTATCCACATCTGTATGCGAGACAGACACACTTCTTTCCTGCAAAACAGTCCCACTATCCTTCTCATCTCCACCTC[C/T]GGA	scaffold81999:5742	9175
SLG-2	DAFWA6009	0.725	33	AATTCATGCTTCATCACACTATCATAGTGATA[C/T]TATCTTTTGGTTTTACAAAATTAATAAGACCCATTATCCATCTGGAAGTACAATTCAGT	scaffold28808:26092	55950
SLG-2	DAFWA2778	0	31	AATTCATGGATTGATAAAACAGTAAAGCTG[G/C]ATAATCACATCATGCATTTTTGGGAGAAGGGTAGGACATACCATAAAAATATAATTTGTCT	scaffold28808:12928	55950
SLG-2	DAFWA3585	0	39	AATTCTGTTTTAAGTAAAAGACTTTTATATGCTTTGGT[G/T]GATTTAGGTACTTTGTGTTCATGGCGGCCTTTCTCCGGACGTTCGAACAGTTG	scaffold28808:15790	55950
SLG-2	DAFWA4790	0	83	AATTCACAGGTTCAGTTACTCAAGCCATTCCTGGTCCTCGTGTGGGTCCCACTTCATTGCCTTGGATTCTCGCTATCCCTCT[C/T]AGTTACGCT	scaffold28808:24248	55950
SLG-2	DAFWA4187	0	34	AATTCCAGGCAATTTATAAGGCATGACAGAGGC[A/G]CAGAAACACACTAAAACCAAAAGACAACATCACTGTCATTACAGAGATATGTCAACCT	scaffold28808:26030	55950
SLG-2	DAFWA2807	0	7	AATTCA[A/C]TTACTTCAAGAGTAATTTTTTTAAAGTTACTCCAAAACTTACTCCTCATCCTAGCCATCATATGGCTATGTCTATACATAATATG	scaffold28808:18687	55950
SLG-2	DAFWA3818	0	28	AATTCAATAAAACCTTGTATCACTATA[T/C]AAACGCTTTGTAAATGAAAACTTTAGAGTTTATCTCAACAAATTATTATATCATATAAGATGAA	scaffold28808:1054	55950
SLG-2	DAFWA5298	0	33	AATTCAAAATAGAGGAAGGGAGGGAGGGAGTA[T/A]AAGAAATTTACTGTTCCATCTATAATTGCGGAAAGTGTTAGATAGTCAAAAACATCTGT	scaffold28808:15723	55950
SLG-2	iDAFWA690	0	66	AATTCTGTTCTGGGTCATGATCTTTCTGCAAGATTCGCTGCTCTGAAAGGTAAATCTTCTTCTTCTCATGTTCCATTAGGAGTGGGTCCCAC-AATTCTGTTCTGGGTCATGATCTTTCTGCAAGATTCGCTGCTCTGAAAGGTAAATCTTCTTCTTCTTCTCATGATCCATTAGGAGTGGGTCC	scaffold28808:5451-TCT-d3	55950
SLG-2	DAFWA3563	3.773	75	AATTCCAAGTGTAAAGTGCAGTATCAATTAGCATAATTCTTGAAAATGTATAGTGTAAGGGAAAAGAGAAACTT[G/T]CAGCTAGAGCCTATGAT	scaffold77035:2852	26268
SLG-2	DAFWA8644	1.453	24	AATTCAGTTGATTGAACATTGGA[C/T]CCGTGTGGTTCAACTGAGGGGGCTGGAGATGAGAGGATCGTTGGACATTAAGATTCTGATATGGAATA	scaffold29337:26423	47192
SLG-2	DAFWA2678	0	20	AATTCATCAAACTTACTAT[C/G]AGATTGTATGGGAATGAAAAATATCAAGTTATTATGTATTTAAATTAAATTATTTTAAATTTTATGTTATTT	scaffold29337:9115	47192
SLG-2	DAFWA7799	0	71	AATTCATGTTTAATCCAAATCACATTGATCATAGGAGAAACGATAAAGAAAGACTTAGAGCTCAATGCTT[T/C]ATCAATGAACATGATTTATGA	scaffold90222:2192	8567
SLG-2	DAFWA5547	0	58	AATTCTAACCTCCTATTCCTAAAACAGCACAACATAATTGTCAAACATACATCATAT[T/C]CGATCAAAGGTAGTAAAAATGAAACAAAGGAGAT	scaffold29337:23088	47192
SLG-2	DAFWA4447	0	44	AATTCCAGAAAACCTATAAATCCCTAACAAAACGTTTACAAGA[G/A]AAATAAACAAAATAAACTTGCTATCCATAATGCAAACACACCAAAACA	scaffold29337:36260	47192
SLG-2	iDAFWA818	0	25	AATTCTTGGAAGAGGAATTTATCTATAACATTATTTTGCGTTACTTTCCTAAAAGTCTATTTGTTGAGTCTTATAAATATGAATATAGGTTG-AATTCTTGAAAGAGGAATTTATCTAACATTATTTTGCTTTACTTTCCTAAAAGTCTATTTGTTGAGTCTTATAAATATGAATATAGGTTGAA	scaffold90222:2100-TA-i2	8567
SLG-2	DAFWA4450	0.718	24	AATTCATTCAAGGCATGTAATTA[A/T]TAATACAATAAACATTACACTTATCCATCAATACCGTTTACATCCAAGTCAAAAACTTCCTATTAAAT	scaffold94829:16892	21276
SLG-2	DAFWA5218	6.285	13	AATTCATTTAAT[T/C]ATGGTATTTTTAAAGCTACCAATTGAAAGATGTCACCATAACTATTTTCCCGATTTTAGATTGTATCTAAAGGTTAATA	scaffold69135:1377	4628
SLG-2	DAFWA2734	0	60	AATTCTTGATGAAGAGTGTTGGGAGAAAGAATAGAAACTGATTTTGTGTTGGTTTTGAA[C/A]TCTTGATTGTTGTGTTTATATTTGATTTGAGA	scaffold73924:10045	17474
SLG-2	DAFWA5922	7.18	91	AATTCTTTTTATATATGTAGAATGTGATTGAATATATTCTATGGATAAGTACCAATTAATTCTTGCTTCTATAAACTTTTTCATCTACTT[A/G]G	scaffold87361:12212	21243
SLG-2	iDAFWA745	2.214	62	AATTCATATCAAACATGCTAAAACTATAACTTGTTACTCAATGAGAACAAAAAAACACAAATGAATAAGTCCTCTGAAGGCTAAGTGAATAG-AATTCATATCAAACATGCTAAAACCATAACTTGTTACTCAATGAGAACAAAAAAACACAAATTGAACAAGTCCTCTGAAGGCTAAGTGAATA	scaffold77243:6623-T-d1	19353
SLG-2	DAFWA1543	0	84	AATTCCCAAACCTTTTCGGAAGAAGCAAAGACTCAATGTCAGCATCATCATCATTGTGATCACTATTGATTGGCACAACTACT[T/A]CATCTTCT	scaffold77243:8525	19353
SLG-2	DAFWA5062	0	61	AATTCCAAGGGCTTCGATTTCAATGCAGACAAAGGTAACTAACAAAATTTCCTTCCCTTC[C/T]TTTTCTATTCCCTTCGATTCATTCAATATTA	scaffold96930:6377	9387
SLG-2	DAFWA5536	0	10	AATTCTCTT[A/G]TTCGTTTGATCTTTCATATTTCAATCTCGTTTAAATTTTGATATACTAATTTCACATATTTTGATCACTAGTGAGGATGCTC	scaffold77243:18986	19353
SLG-2	iDAFWA275	0.221	25	AATTCATTTCTTCTTCTTCTTCTTCTTCCATTGTTGTTGTTGTTGCAATCTCTTCTTTAGACATAGAAGAATTGCAATAGTTATTGCTTCCA-AATTCATTTCTTCTTCTTCTTCTTCCATTGTTGTTGTTGTTGCAATCTCTTCTTTAGACATAGAAGAATTGCAATAGTTATTGCTTCCACCA	scaffold77243:5440-TTC-i3	19353
SLG-2	DAFWA8389	0.493	80	AATTCGGTTGTTTTTAACTTATCTTGCAGGCGAGTTCTTCGTTGGTGAAGTCGAGAAAACAAACTGATTCTAAGTTGGA[C/T]TATTCTCATGTT	scaffold78608:32055	33694
SLG-2	DAFWA3624	0	20	AATTCTTAACCAATTTTGA[A/T]TTTTTTTTGTTAATTGTATTAGGTTGCTTTGACTCATGGACCTGAGAATGTGAAACCGCAAAAGAAACAAAC	scaffold78608:25670	33694
SLG-2	DAFWA2291	0.718	58	AATTCAAAAAAGTGGCTAATATTTATAGAGGTGTACAAATATTTTTTATTTCCCCGG[A/G]AAAAAACGTTGCTAGCTCTCAATGCCTTATTATT	scaffold98432:2073	2193
SLG-2	iDAFWA800	0	75	AATTCGACACATCGGGTAAACCCGTGCTTCCAGGATTCGAACTCGTGACTTTCAAGTTTTACGGCAAGCAACCTTAGCATTAGGCAAACGAA-AATTCGACACATCGGGTAAACCTGTGCTTCCAGGATTCGAACTCGTGACTTTCAAGTTTTAAGGCAAGCAACCTTGCATTAGGCAAACGAAT	scaffold80195:2202-A-i1	4975
SLG-2	DAFWA4160	1.453	51	AATTCTCACACCACCAACACGGTATTGCCCGAATCAATAACGGAAGCTTC[G/T]GTAGTTGCCCCCGTTCCGTTCTAACTGCTCATAACAATTGG	scaffold88682:3891	11155
SLG-2	iDAFWA624	0	34	AATTCAATAACAAAGATTGCTGTTTTATACTGGGGATGGTATGGTTGATAGTCTGCTTGCACGCACATCTTAGGCAATGTCACGAAACGTCT-AATTCAATAACAAAGATTGTTGTTTTATACTGGGATGGTATGGTTGATAGTCTGCTTGCACGCACATCTTAGGCAATGTCACGAAACGTCTT	scaffold92889:6765-G-i1	28108
SLG-2	DAFWA6069	0.718	51	AATTCATAGATTACACACAAGAAAGAGATAAGAAATGTGTACATAGCTAC[G/T]GAATATTCTTCCCAAAATCAAAATGAGAATGTATAAGTTTC	scaffold84377:4486	17732
SLG-2	DAFWA1890	1.453	8	AATTCAA[C/T]CTCTCATTCTAGGTCCAAACACATTGATGTAAGGTATTATTGGATACGTGATGTGTTGGATGTTAGGTTGTTGGAATTGGCTAA	scaffold12395:6211	25639
SLG-2	DAFWA8315	0	41	AATTCACTAGAATCAAGGAATGTATTATCATACATCAGAA[G/T]AAGTACATTGTTGATGTTTTGAAGAGATTCAACATGTCACATTGCAACTCT
SLG-2	DAFWA6148	0	87	AATTCGAAGTCGTGAGAGATAGGAATGGGAGAAGAGTGAGAGTGAAGAGTGGTTATAGCGAAGTGCATGGGGCTGGTGGGAGCACT[G/A]TAGAA	scaffold22929:321	33170
SLG-2	iDAFWA464	0.717	35	AATTCTTTAATATTATTTAGATATCCGGTGTATTTAGTATTTACTTTTTTCTATTATTTTATATATAGATTTTGCTAAAGGTGTTCTAAAAA-AATTCTTTAATATTAATTAGATATCCGGTGTATTTTAGTATTTACTTTTTTCTATTATTTTATATATAGATTTTGCTAAAGGTGTTCTAAAA	scaffold76370:765-T-d1	1845
SLG-2	DAFWA5261	0.718	83	AATTCGGTAAGTGGTAAGTAGGGTAAATGAGAGACTCGTGTAACTATGCTACTTCTCATATTATACAATCCTCATTAATTAT[G/A]ATCTCAAAA	scaffold66597:7859	14428
SLG-2	iDAFWA613	0	37	AATTCATCACCAACCATTATGATTATGTTTTGCTTAACGCAATTGTTTGGAAATGTGTAATTCAATTTGTAGAAACAAGTAAAATTACGTAC-AATTCATCATCAACCATTATGATTATGTTTTGCTTAAACGCAATTGTTTGGAAATGTGTAATTCAATTTGTAGAAACAAGTAAAATTACGTA	scaffold66597:13386-A-d1	14428
SLG-2	DAFWA2663	1.453	44	AATTCAATGTGAGACAATACTAATACTCTAGAAAAGACATAAT[G/T]AGAAGTACAACCCAACCACAAGGTAAAATAAATGTGAAACCATATGGA	scaffold68499:8227	24116
SLG-2	DAFWA2131	0.849	12	AATTCACCCAT[T/C]GTCACTTTTTTCTGGTATAACCAAGGGCATCTCCTCTCCCAACATTTGTCACTCTCAGGAATCCAACATTTGACCTTTGG	scaffold68499:2938	24116
SLG-2	DAFWA5947	0	71	AATTCATTCTTCTCTTGTAATAAAAATCAGTTTCACCTTTTCTCTCTACTCTCTCTTTTCTATCTAGCTC[A/G]TTTTACATTTCTTACATTGCC	scaffold89175:4179	10976
SLG-2	DAFWA5233	0	15	AATTCATTAGCATT[T/C]GATATGCTAATGATCACTGAAGAATTTGTCTGTAGATGAATCTAGATTTTTCAAACTGAATATCCATCAGCCTATCA	scaffold97662:11518	17218
SLG-2	DAFWA3318	0	17	AATTCAATTTGTTTTA[G/A]TCTCTTTTTATTTGAAAACTAGTTGTAGTTTTAGGTTTAAAACTTAATTGATTTCGTTTTGTTATTTTTTTTCTA	scaffold66808:561	22153
SLG-2	DAFWA4297	0	8	AATTCTG[T/C]GCCTTTAAATAAGTCTTCCCAGCTTTGATTGGGATTGATCAGGTCCAAAGTGACTTCTAAATAATGCAGGTCTCAGACAAAAGA	scaffold68499:2953	24116
SLG-2	DAFWA2883	0	20	AATTCGTGAGGCATGAAGA[A/G]TGAGTTACTCGGTTTTTAAAGAACACACACTACTGAGTTTAAGATATACAGCGTGACTCGTCCGAGTTCATG	scaffold67831:5381	5672
SLG-2	DAFWA6609	1.12	16	AATTCCCATCCATTG[A/G]TTACTTTCTCTTTTCTTATGGCAAATTCCTTAATTGTTGAAATGAAAGTTTTCTTCCTTTTATATGATCCTTGCTT	scaffold84378:1711	34665
SLG-2	DAFWA7735	2.413	50	AATTCCTTGGGTTGAGTTCTGGTTTAACACCACCTATAATAGTTCTACA[G/T]GCATGACACTATTTCGAGCTTTACATGGAAGGGATCCACCTA	scaffold84378:30503	34665
SLG-2	DAFWA3701	0	16	AATTCGATAGGGAGC[G/A]TATCTTTTATCCTAAAAATTATATTGTTATGTATTAGATATTATAATTGGTCATAAAGATATCTAATTATTATATG	scaffold10695:7524	29875
SLG-2	iDAFWA85	0	67	AATTCACCAATGTTATATCCAAATCCCAAAGGAAAAATTTAAAAAAGAGAGAAAAATCTGAAAAAAATCCATAACACCCGAAGGGGCAGCTA-AATTCACCAATGTTATATCCAAATCCCAAAGGAAAAATTTAAAAAAGAGAGAAAAATCTGAAAAAAAATCCATAACACCCGAAGGGGCAGCT	scaffold22401:11562-A-d1	16028
SLG-2	iDAFWA840	0	15	AATTCAATAAAACGACACTCTGCTTGATGACAACTGATGATTGCAAAGTAAAGCTATAAAGTAATGCAACATTAATTTTAAATTTGCTTGAC-AATTCAATAAAACCAGGACACTCTGCTTGATGACAACTGATGATTGCAAAGTAAAGCTATAAAGTAATGCAACATTCATTTTAAATTTGCTT	scaffold8863:13122-GGA-d3	20387
SLG-2	DAFWA709	0.718	67	AATTCACTTCTAGAACCATAATTTTCAAAATTCTAAGTAATGAAATTACTGAAGTTTTGGTACTTC[A/G]TCTTCAGCTGGCATGGCTAGCCCGA	scaffold8863:17996	20387
SLG-2	DAFWA2469	0.761	25	AATTCTACATCTTCTGATTGATTT[G/A]GAGTCGCCACTACGTTTTTTACGGTTAAAACGTAGAAAACTCTATAGTAAGCCCAATTTGGATAATA	scaffold12553:981	2784
SLG-2	DAFWA3683	0.675	83	AATTCGCCATCCTTGGTTGGTTGTTTTGCTGAATTTAATAATATTCAAGACTCTCTTTATGTTCAGCTATCCTCTGCTTTCT[T/C]AGTACTCCA	scaffold10695:14010	29875
SLG-2	DAFWA7188	0	73	AATTCTCAAAAATCTAAACTCATTGGTAAGAGGATAAATAATATATATATGATTGACATAGACTCTTCTTTA[A/C]CAATAACATGTTTAGATGT	scaffold11328:5736	11603
SLG-2	DAFWA6265	0	6	AATTC[C/T]CCTTCTTCTAAACATTTCTCCTTAGCAAATTGTTGCCATCCATTTTCAAAAATAAAAGTATCCTCTATTCTTGCCATGTCAATGTC	scaffold70017:2465	2818
SLG-2	DAFWA227	0	32	AATTCCTTGTCCCATATATCATCAAAGAAGA[C/T]AACATACCTCTTTTCTCGCATATAGCTTTTCACTTCTTTGGTCAATGACGCTAAACTCAT	scaffold22279:4529	20729
SLG-2	DAFWA1138	0	85	AATTCTTGGTTTTTGAGTATGATGGCAAGTCTACATTTTATGTGAAGATATTTTCCAAAAGTGGGTGTAGGAAAGAATTTGAAA[T/C]TTGTAAT	scaffold70017:2551	2818
SLG-2	DAFWA5481	0	86	AATTCCTTACGAGAATCTTCCTTCTTGTGACAGGTGCCCACCAGTAAATCCATTTTCAGTAATGTTATTCTGATCACTTTACCCG[G/T]CATCTT	C28751634:1166	10080
SLG-2	DAFWA6387	0	72	AATTCAACTAGAAAATCATATAATCTCATATAACCTTTTAAAAAAGAAAGAATTATTTTCAAATGTCTTAC[A/T]CAATAATATTAACATCACTT	scaffold77702:598	2609
SLG-2	DAFWA3342	0	30	AATTCTATTGACACGATCATATTATTATG[C/T]TATTAATTAAACTTATACATCATTAATTAGCATAGGAAACTGTAATTTTTGTCTGGAAATTA	scaffold33591:10646	25360
SLG-2	DAFWA2865	0	11	AATTCAAACC[G/C]TAAATCTGGAAATGAACAACATCACGATCAGGTTAGAAGATTGAAATCGACCGAAAATAAAAATTAAAAAAACTCAAATTG	scaffold63207:10807	11432
SLG-2	DAFWA305	0	75	AATTCATTTAATTAATTTCCAGACAAAAATTACAGTTTCCTATGCTAATTAATGATGTATAAGTTTAATTAATA[G/A]CATAATAATATGATCGT	scaffold33591:10646	25360
SLG-2	DAFWA7701	0	35	AATTCAGGTTCGCCTCTCCATAAGTCGTAGCTCC[A/G]GTCTTCCAACCAAAAATCGGGTCACGACATGGAGCATCGAATCATATAACAGGGGAT	scaffold12553:1036	2784
SLG-2	DAFWA5323	0	62	AATTCATAACTCAATTCAACATAAAAACTCTCTTCTCACACATGCAACTCTCTTGTAAAAA[T/C]AGTAAGAAAAATGCAAAATGCTCTCTAAAA
SLG-2	DAFWA2029	0	37	AATTCCTATGAATATCAATTTTTGTTAATCTTTATT[G/A]TTATATTGTTACTATTGTGAGTTTTATTACTTTGATTTCCTTGTTGACCTATTAG	scaffold77987:1783	2356
SLG-2	DAFWA6501	0	9	AATTCAAA[A/G]GACCCAAGCGTACGAGATCTAGTTTCTTAAGTTTCTGAAACATCCCATTTTCGAAATGCAAAGTTTTACCTTCATATGCATTC	scaffold71214:2469	22813
SLG-2	DAFWA7380	0	12	AATTCAAACGC[C/T]CCACCAGATAAGGAAAGAAATCCTTGGCCATTTACTTGCTTGATTCATTAAGGAAAGATTTGTCATGATCTTCTCCTTTT
SLG-2	DAFWA2908	0	23	AATTCACATTCTCTTGCTTTAT[G/A]ACTATTTATTTCCTTAAATTTTACTCCTTCCTATATTTTCTGCTGCTCTCTTTTTTTTATGTCTATTTT	scaffold85423:10724	11150
SLG-2	DAFWA8474	0	83	AATTCTTTTGGTTCACTTGTTATTTTTGTTAGAATATACCATAAAAATGGTTATAGAAGGCACATGGGAGAGAATATTTGAT[G/A]ATGTATAAA	scaffold10695:13387	29875
SLG-2	DAFWA2316	0	54	AATTCAAAGTTGAAGCACTTTTCTCTCCCTCCTTAGGTAAGCATTTATATGTC[G/C]TTCTCCCCCTCAGGTAAACACATAACCTTTTATAACAA	scaffold22279:18243	20729
SLG-2	DAFWA5567	0	59	AATTCCTCCATAGGAAGTCTAGTAGGCGACCTTGAGCCACGACATTCATGGGCTCCAA[G/A]CACCACATTGAAGTCACCTAAGCAGCACCAGGG	scaffold22401:8784	16028
SLG-2	DAFWA500	0	66	AATTCATGTCCTTAAGTTTCTTTTATGGCTTTCTATTCATAATTCTTTCCCTACTAATTTTATTC[G/T]TTTCACGAGGAAAATATCTATCACAT	scaffold12344:10919	12205
SLG-2	DAFWA341	0	22	AATTCCCTCCTAGCTCCTCCA[G/A]CCTCACAAAAAGTTTCACAATTGAGAACTCAGAGTATTCTGATGAACAAGGCAAAATAACTGAAGCTATA	scaffold22279:10998	20729
SLG-2	DAFWA5653	0	31	AATTCATGCTTTTTGTAGCATGTGTCAACA[G/A]TGTGACCTATTCTTTGGCAGTATGTGCATGATTTTTGACCTCTTCCTCTTCCTAAGGTAGA	scaffold22279:11046	20729
SLG-2	DAFWA6420	0	71	AATTCATCACGAATGAATTGAGAGTCGCATTTCCAAGATAAGGATCTTGTAGTTTCTCCATTTGTTCATA[G/T]GCACCCAAGGCATTTCGATTC	scaffold36842:2112	16144
SLG-2	DAFWA1373	0	88	AATTCAAGCTAGGCCCATATGTCGCAAACTGAGTCCAGAAAGGTTGAGTGCATGTGGTGAATATAGGCCCACGTTTAGGAGGTTTTC[C/A]TGTG	scaffold10695:7671	29875
SLG-2	DAFWA3644	0	16	AATTCTTAAGTTTGA[C/T]ACTCCCAAGATTATTGCCAGTGAGTATATCCCTTTATCTAATTTATCTCTTTTTTTATTAGAATTAGTCACACAAA	scaffold85485:4997	7975
SLG-2	DAFWA2217	0	49	AATTCAGGTAAATACAAGTGGCTGCGGTTGGACTTTGGCAACATAATA[C/A]CATGGGTACTTTTACTAGCTTAGACCTAATAAGAGATAAAGTA	scaffold11328:2513	11603
SLG-2	DAFWA413	0	23	AATTCTTACTTTCAATGATGCA[C/T]TTATTTGGGTAGAATGCAACATGGAAGCCTTTTTGGCATAATTGACTTATGCTTAGAATGTTGTGATTG	scaffold11328:5645	11603
SLG-2	DAFWA8013	0	54	AATTCAGTAGTCACAATCTTAATTTGTGGTGTTTTATTGCAGAAAAGAGAGAA[G/A]GTATCATGACTTGCATCCTCTACCTACCATCATTTTTG	scaffold84378:25815	34665
SLG-2	DAFWA6332	0	89	AATTCTTATCATTTCTTCTCTTTGTGATGTTGAGGTTGATTCTGATTTCATCATTTTCATTGGAAGAGGTTCAAGGTGCTGATAGTTT[T/C]ATA	scaffold68282:1135	2813
SLG-2	DAFWA2584	0	70	AATTCCATAGTTTGTTTTCTTTGATAGGCTCATGACCCTTTGTCCAAAAAATTAACTAATAACATATAT[T/A]AATTGGTCAATGGATATTTATA	scaffold33591:10741	25360
SLG-2	DAFWA5714	0	79	AATTCAGTAGAATGATCTGGCTATATGTGTTGAAATTAAAGAGTGAAGCATTTGAAGTCTTCCTAAGATTCAAGGCTG[C/T]AGTTGAGAGGGAA	scaffold85423:3729	11150
SLG-2	DAFWA8581	0	16	AATTCATCAACAAAT[G/A]TAATGAAGTACTTGTTTCCACCTAATGATGTCTCTTCAAAGGGACCACAAATGTTTGAATGCACAACTCCTAAGAC	scaffold85423:3639	11150
SLG-2	DAFWA5401	0	34	AATTCTAAAATAAGTATGATAAAAAACAAAGAG[C/T]GATGAAATAACAAAAAATGTAAACCTAAAACGGGATTGGAAAAAAAGGAAATTACCTA	scaffold89086:4092	4533
SLG-2	DAFWA8286	0.717	17	AATTCAAGTCCACGCC[A/G]GTTAATTTAGTAGAAGTGATTGATGGTGTTGGAAAAAGGGGCTGCAACAACATACTACTGCTATACCTGCAGATA	scaffold2300:4663	15700
SLG-2	DAFWA8364	0	33	AATTCTAGTACCTGCCAATCTGTCAATTGAAA[A/G]AACAATTTGACAATGGAACATTACTAAGTTATTGTTAAAAACAACACCAAGAACAAAGA	scaffold19134:2843	6361
SLG-2	iDAFWA272	0.718	60	AATTCAACTTTGGTCTTATTGTTTAAAAACATTGAAGACTCTTTTATGCTTTGGTTTTTTCTAATTGAGCAAGTTGCATTTAACTAATTTAC-AATTCAACTTTGGTCTTATTGTTTAAAAACATTGAAGACTCTTTTATGCTTTGGTTTTTTTCTAATTGAGCAAGTTGCATTTAACTAATTTA	scaffold31280:3060-T-d1	5612
SLG-2	DAFWA2220	0.718	86	AATTCATTAGCACATATCTTCAACTTTTTTTGGTTTGCCACAGGTATCCTCGCACTAGAGGCAATCTTGTTCGAGCCGGAAACAT[C/T]CACAAG	scaffold35637:2468	26699
SLG-2	DAFWA7127	5.424	58	AATTCTCAGGTCATAAGAGTGTCTAGTTGTGGTGAATCTACTTATCAGTTATCACCA[T/C]CCCCAAACATACCCATCATGTCTTTGGTAGAACC	scaffold84042:13645	19343
SLG-2	DAFWA3674	1.454	26	AATTCGTTGATATCATAACCAACTA[C/G]CATATATTTTCACTAAACCCTTGGCTAAAGAACCTTTTTATAAAATTAGACGTGAGTTAGGCATTC	scaffold27936:8562	10433
SLG-2	DAFWA6674	0	74	AATTCCCACAGTATGGCGACCCGTGCCAATTCTTTACCCACAATACTGACTACTGATGTCAGTTCTCGAAATC[T/C]CACTTTGGTTGCATGTGT	scaffold14915:1573	16453
SLG-2	DAFWA1707	0	61	AATTCAACTAACTATTACAAAGATACATTGCATTCTATTTATAGTAAGTCTTTTAACTAC[C/G]AACTAACTTTGAATTAACTACCTTCTATATT	scaffold52082:6718	7467
SLG-2	DAFWA4565	0	73	AATTCAAGCAAATAAAACCAGCTTTGTTAATTGCTTCAAAGTTCGAAGTTATAATGTTATGATCCCTCCTTT[T/C]ATTTGTTGGGTAGTTATTA	scaffold67829:19009	31547
SLG-2	DAFWA5827	0	30	AATTCTTTGTCAAGTTCAAAGTTTGGAAG[G/A]CAGAGGTAGAGAACCAGACTGGTAAGAAAATCAAATACATGAGGTCAGATAATGGTACGGAG
SLG-2	DAFWA5279	0	7	AATTCA[A/G]GGATTTAGGTATGACTTTATATCCTTGTTTTATATTATGTGTGAGAATCATGATATTCAAGATCCTAGAATTGGTATTTCACCAA	scaffold14915:15839	16453
SLG-2	DAFWA3779	0	68	AATTCTCTAAACTACTCTTTAACATTATGTACATAATTTGACCAATCTTCCCAAATCTGGATGACTT[A/G]GTCATCTGTGTATGAATCTTCATC	scaffold20516:2370	7699
SLG-2	DAFWA716	0	80	AATTCTGGAGGCATGATACTTTGTAGCCTTTTCTTTGTACAGTCTTGAATAGCATAGGCTTGGAACCTCATTTCTTCTA[G/T]TTGATATAATTG	scaffold39947:11538	16154
SLG-2	DAFWA1353	0	80	AATTCATTACTGCAATTTTAAGAGACAAATCAATGTCCATTTCTTACTATTCATCTTAGCCATTAACTCTAGGGACATT[A/G]GTTCATAAAGTA	scaffold79565:17262	18671
SLG-2	DAFWA3266	0	86	AATTCTTATTGTATCATTTTGAAAATATTAAATTTGTTCATATACAGACCAGTTTTGACCAGTGCGGTATGATATGGTTTGACTG[A/G]CATTTT	scaffold87560:5654	10421
SLG-2	DAFWA2572	0	49	AATTCTAAAAAAGAAATAACTTGTTTTATAAAAGCCAATAATGAATCT[T/C]ACTTTCTAAGATAATAGAGTTGGTTTAAAATCATTTAAAGAGT	scaffold67002:3039	3230
SLG-2	DAFWA2699	0	40	AATTCTCTCTCAATAAAAAATGGAAAATTTCGTAGGAGG[C/T]ACAACACAAAAATAAACTATTATTGGGTCAGAGGTTGTGAGTATGAATTACA	scaffold32714:2753	3047
SLG-2	DAFWA4161	0.717	81	AATTCCTTTCCATTGTCACTCCTAATGGATTTGAGTCTGCTATTAAACTGGGTACTAACATATGACACAAAGGTTCGGAT[A/G]TGTTGATTGAC	scaffold84042:3817	19343
SLG-2	DAFWA7443	0.718	50	AATTCATGATATTGGATCCAAGTTTAATTGGGAAGTTAAACTTTGTATC[A/G]AATCTGAATTATATTCCTTGTTACATCACTGCTCTAGGAATG	scaffold98302:496	1758
SLG-2	DAFWA5840	0	77	AATTCTCCAACTGATGAATGGATTCAAGAACTTTGAGGATTGCAGAAACAGAACATAGAACACTATCTATGCCAAC[G/A]AATAAGCATTTCTGC	C28746742:4491	8056
SLG-2	DAFWA7903	0.718	91	AATTCAATTCCAAGTGGATTATGAAGTTACTGATTCAAATGCACATGTCATTCACATCAATCCCTTGAATGTAAAATCCTTATATAATTG[C/T]T
SLG-2	DAFWA5236	2.979	42	AATTCTTGTTCCATTTGAGAGAGTATTTGTGAGAAAAAGAG[A/G]ATTTCTTGTACTCTTCTTTTTTACATAGTGGAATTTTGCTCTTGATCGCC
SLG-2	DAFWA8139	1.453	59	AATTCCATGAACTATATTAGTTGAACCAAGTCGATACAAACTTTTGAAATTTAAGTGG[A/C]TATACCTTAAGTGCCATAACCAACTTTCTTCAT	scaffold16172:7746	16997
SLG-2	DAFWA1702	0	44	AATTCTTCATTACATGTGTCTAATTTAAATATTTTTATTGACT[A/G]TAGCATTTAGATGATATATCTTCTACACTTAACCAAATTTCTATTACA	scaffold17231:23132	30057
SLG-2	DAFWA2299	0	66	AATTCACTTCCGAGCTATGGAACTCAAAAGCACGTTATTGGGCCGAATTTAGGCGAATTTGAGTC[T/C]GCAACAGCTCAAAAACTTTCTGTCAT	scaffold17231:1304	30057
SLG-2	DAFWA1560	0	62	AATTCCTACTTTGTGGTAAATTTTCGTAATTTTCTATGACAGAAAGTTTTTGAGCTGTTGC[A/G]GACTCAAATTCGCCTAAATTCGGCCCAATA	scaffold17231:1304	30057
SLG-2	DAFWA3838	0	60	AATTCGAAAATCATAAATTTAATAAATTATATAATAAGCATGGCATTATGCATCAGTTC[T/G]CAGCTCCTCGTACCCCTCAACAAAATGGAGTT
SLG-2	DAFWA3825	0	83	AATTCAACTAACAAGATGTTTGTTTAGTGATACAATGTTTTGTTAGATTTCTAGGAAGATGAAAAAAATCAAAATTTTGATT[A/G]TTGTGAATG	scaffold40633:5490	6105
SLG-2	DAFWA4089	0.718	92	AATTCAATCATTCAATAAAAATATTAAAATTCATTGTGAAATTGAAATTGATTGGTAAATTGTAAGATGGCACTATCATTTTCAGAGAAGG[A/C]	scaffold9539:14847	16399
SLG-2	DAFWA3983	0	6	AATTC[T/C]CTCCACCTATTCCATTATCATATCTCCATTCTACAATGCAAAAACAAAAACCATAAACAAAGGTGCTGATTTTATAGAAAAATAAC	scaffold67261:2567	7446
SLG-2	DAFWA2203	0	21	AATTCTTCAAGCGCCATGGT[C/A]TACAGGCATCAGATCCAAAGTAAAGATCATCTGAAAAGGTTTTAATTACTTAATAATACTTGTCAAAACTT	scaffold86676:8062	24060
SLG-2	DAFWA6041	0	40	AATTCTTATATTTCTTCTATTAATTCTTTTATCATAATG[T/C]TGCTACTTTAATGTGCTATATTTTGAAAAATTATATTATCTCTTTAAATTTC	scaffold40633:4874	6105
SLG-2	DAFWA3034	0	40	AATTCATCCATTATATCAAATTGATATTCATGGATATAT[T/C]CATTTGGGTGAATATCAAATCAATCTAAAAAGTAAACATTCAAAAATGGTGT	scaffold16172:12154	16997
SLG-2	DAFWA8371	0	68	AATTCACTTCCACGAGTGCAATATATGCATGTTATGTCATGATCATCCACCTTACACCAATATCCTC[T/C]CAATAACCTAGTCGGAAACAAATG
SLG-2	DAFWA6814	0	12	AATTCTCTGCG[T/G]AGTATGTGTTTGTCATGCCATCTTTTTGTTCTTTCTTTGTAAGTACGAGTATTCTCATAAGCATCCAACCACAGTTTTTC
SLG-2	DAFWA3933	0	28	AATTCAAATTCATCCATTGGATTATAT[C/G]AATTTAAATTCATAGGTCTAATGAATGAATTTTATTTTCTTGCATTTAGATAGATTATGGATAA	scaffold16172:12217	16997
SLG-2	DAFWA6226	0.718	33	AATTCCAATCTTAAAAGCAATTATTCAATTAC[G/C]ATAATAAAAGTATATATCTACTTTCCCAAATCACACTAAATAGGATCATCATATTGTTT	scaffold63040:463	4314
SLG-2	iDAFWA565	0.718	54	AATTCAATTATTTTACTACACCTGATTTATTGTTAAGAAAGTCTTATAATAATAAAATTGTGACTATCGAACAAAGACAAATTCTTCTAAAT-AATTCAATTATTTGACTACACCTGATTTATTGTTAAGAAAGTCTTATAATAATATTGTGACTATCGAACAAAGACAAATTCTTCTAAATAAA	scaffold56753:7857-AAA-i3	10142
SLG-2	DAFWA8280	0	84	AATTCTCTAAACTAGTCTTTAATAGTAAGTACATAATTTGACCAATCTTCCATAATCTGGATGACTTGATCATCTGTGTATGA[A/T]TCTCCAAG	scaffold34170:13869	24061
SLG-2	iDAFWA199	0.249	37	AATTCTTCTTATGGCCAATTGCAATAATTTTTTTTTTTTGAGTAAATGAATGCATGCTTGTAAACTACTCAATTTATGTGGTAAAACTTCTT-AATTCTTCTTATGGCCAATTGCAATAATTTTTTTTTTGAGTAAATGAATGCATGCTTGTAAACTACTCAATTTATGTGGTAAAACTTCTTGT	scaffold25544:2716-TT-i2	8923
SLG-2	DAFWA3922	0.221	28	AATTCGAGTATGATATCAATTAAAATA[A/T]CTCACTTAGTAAAATCATGAAATCTAGGGATTATTAAATAAGATGTCTATTAAAATAAATATTT	scaffold77500:1977	4823
SLG-2	DAFWA5579	0.242	18	AATTCTCTCTTTTTGTA[A/G]TGATACTAAATCACATTTTCAGATTTTCGACTTATTACCGCTCTCCTTTTCTTAGGTTGCCCTTGCGGGTTTTC	scaffold1357:9411	25219
SLG-2	DAFWA5632	0	12	AATTCTCCATT[G/C]TTTAAGTAAATCAGAGTGAATATGTTGTTCTTGTGAAGGTACATTGTCATCTATTTTTAGATGCTCTATGTTGGCTATTA	scaffold22635:1373	9223
SLG-2	DAFWA5074	0	58	AATTCAACATCAAGGATCTGGGGGAACTCAAATACTTCCTTGGTATGGAAGTTGCAA[A/G]AGGAAAATATGACATCAATCTTTATAAAAGAAAA	scaffold70435:11303	12127
SLG-2	DAFWA6564	0	8	AATTCAT[A/C]TACCCCAAACTAGTTAGAGACTTGTAGAAGACAATTGTGATAAAAGAAGGTAATACAACAGGATGATGAGTGGATATGTTGGAA	scaffold36001:4722	38868
SLG-2	DAFWA8580	0	83	AATTCAAGTCCAAGAAAGCTTACATCGGATGGGATGTACCTGAGGAGGAAACGACATCAAGCACCTCTAGTGAGGAGGAGTC[G/A]GCAAAGCCA
SLG-2	DAFWA6223	0	80	AATTCTGCAGGTTTTCTTGCATTAATTTGTTGTATTCTTGAGCCTCTTTCCCACTCAGTCTTTTGATCCTTAACATTTG[A/G]CAAACATTACTT	scaffold34432:8168	8509
SLG-2	DAFWA4940	0	81	AATTCATGTAGGACCCAGTAAATAGAGACTGGACCCATATGATTTAGTGGGTAACAAAGTAGATCCAATATTGGTAAAGA[G/C]TGTTACATTAC	scaffold22635:3865	9223
SLG-2	DAFWA7053	0	19	AATTCTAGGGGAAGCCCT[G/A]GCATGCACTGTAGTTAAAGGATAACTACAACAATGTTTTTTTATAGAAAGCATTGTGATACATTATTAATACA	scaffold2919:11363	15010
SLG-2	DAFWA7684	0	87	AATTCTTGCGCTTTATGAATTTCTTCTACTAATGTATTTACTCTGTTGCCGATCAACTTTCCTATGCTTTAGCTTTTTTAAACTTC[A/T]TCTTA	scaffold93993:942	2575
SLG-2	DAFWA4474	0	15	AATTCAAGTCATCT[T/A]TGGTCTTACCTGGGACATTGAGTAATGTACCAAGGAGACTTTCAAACACATTTTTTTCAATATGCATAACATCGAGG
SLG-2	DAFWA2244	0	17	AATTCTCAAAGAAAGA[A/G]GATGTCATTGTTCTAGATGATTATAATGGACTATTTGATTTTGTATAAAAAAGGTAGAGAGAAAAAAAAATGGAA	scaffold9239:19760	27854
SLG-2	DAFWA8359	0	59	AATTCTATGTCCTTGCTTAAGATGTTGTTACTCAAACCAAAATTACTCCAAATGAGTT[A/C]AAAGGTCATTTAGTGTGTCATGGTATTGATTAA
SLG-2	DAFWA1197	0	72	AATTCTTGACTCCTCAAAGCTGCTAAATGAACTTGTTATGCTCTATTTTGTGTGAGGGTGTTTTGCAGAAT[A/G]CAAATTGTGTTTAACGATTC	C28710302:742	3829
SLG-2	DAFWA4521	0	87	AATTCGATGAGATCCGCTTAGAAGCCTATGAGAACTCTAAGTTCTACAAAGAGAAGACCAAAAGATTCCATGATAACTTGATTTCT[A/G]AAAAG
SLG-2	DAFWA7568	0	60	AATTCTATGCCAATGCTTACCCATTGGAGGGAGAAGAAGCTGTATACAAATCTTGGGTC[A/C]AGGGGAAGACTATCCTGTTTGACAGAGATATT	scaffold35625:5014	6927
SLG-2	DAFWA248	0	53	AATTCCAGCCACAAAGAATGAGAAAATAAGAAAGGATTGAATAGCCCAATAA[G/C]TTGCTTTGCCCATTGTGTTTGTTGTAAAGGGAACCCAAA	scaffold96612:534	1500
SLG-2	DAFWA22	0	35	AATTCATCTCATTCATTCAATCAATATTTTTCCA[T/G]TTACATTGATGAGTATTTATACAATGAAGAAGAAAGTGAAGGAAGAAGTTAAGCTGA
SLG-2	DAFWA3509	0	17	AATTCACAAGCTTCCT[T/C]ATTAGATACTCCACTCTTATCTTGAGGCATGCACAGTTCTTCCAAATCCGCTTACGCTTCTTCTTCTGTGGGAAA	scaffold1437:5766	13586
SLG-2	DAFWA6559	0	13	AATTCTTTATGT[T/C]CAATTTTTACTCCACCAAAGGCGTAAAACATCAAACCGGTTGTAGGTACACTCCTTAGCAAAACAATGTTGTAGAAAGA	scaffold47977:11580	19238
SLG-2	DAFWA3584	0	61	AATTCCCATTTTGGTAGCAAAGTTGCTCAATTGCCTCATGCCATGTTTGGCACCTCTTAT[G/A]AGTCATTTTTATTTACTAGAACAACAATGAA	C28710302:614	3829
SLG-2	DAFWA87	0	23	AATTCTTCATTGAACATTTTCC[G/C]GAACACATTTAGGTTATGATAGGGAGTTAGAAAAAAAAGGGAAAAAGAGATCAAATGATTAAGAAGGGA	scaffold75695:15587	19108
SLG-2	DAFWA2225	0	38	AATTCGGAAACGATGTTATGACTCGTGTTGCATCTTT[T/C]TATCCATTCAAGTCAAGAAGCGGTTGCAGTCATTAGTACTGTCTCTGTCATTTA	scaffold1437:12173	13586
SLG-2	DAFWA1055	0	51	AATTCTTACTACACTGTAAGAACCAATCTCGAATACACCCACCACAATAT[A/G]GCTACCAGTGCCAATTCTCGAAATTACCCACAATATGACTA	#N/A	#N/A
SLG-2	DAFWA2187	0.399	57	AATTCTATTTTCTCTCTTTCCTTTTCTCTTCTTACTTCTCTCTCTCAGTAGTTACC[T/C]TTACATGGTATTATGCCAGCTATTGATAACGTTTC	scaffold49064:14166	25329
SLG-2	DAFWA2144	0.314	92	AATTCTTAAGCAACTATATTGATAAGCTATAGGTTGTAGTCTAATAGCAAAATATGAAGTTTTGAAAATCTCCACCATTAATTGGTGATCA[G/A]	scaffold10384:22018	36004
SLG-2	iDAFWA330	0	57	AATTCATGAAATGATTAATCTTAAAAATATGTATTACTTATCACATTGAAATCTTACTTTTTACATTGCTTGGTAACTTAATTTATGTTTGA-AATTCATGAAATGATTAATCTTAAAAATATGTATTACTTATCACATTGAAATCTTACACTTTTTACATTGCTTGGTAACTTAATTTATGTTT	scaffold45189:23841-AC-d2	24248
SLG-2	iDAFWA200	0	69	AATTCAAATGCATGAACCTAATTATCATATATTTCTAGACGATGTTTCATTTTAGTGGATTAATTACTTTATTAAGTCTTGTGAGACTCACA-AATTCAAATGCATGAACCTAATTATCATATATTTCTAGACGATGTTTCATTTTAGTGGATTAATTACTTATTAAGTCTTGTGAGACTCACAC	scaffold24338:9058-T-i1	15262
SLG-2	iDAFWA441	0	41	AATTCCACCTATAACTCTCAAAATAAATGCTCTAACATGTTCAATAACAACTTCACTAGCATTATCTGGAAGTTCACGGAATGTCCTCTCAA-AATTCCACCTATAACTCTCAAAATAAATGCTCTAACATGTTGTTCAATAACAACTTCACTAGCATTATCTGGAAGTTCACGGAATGTCCTCT	scaffold9761:14402-GTT-d3	21794
SLG-2	DAFWA1523	0	88	AATTCGGCCACCCTTGGAGTTGTGGTCTTCATGAGTAATGGTCTTCATGATTCAATGTGAGTTTGAATGTCTTGCACGAAAAAGCAT[A/C]TTGA	scaffold9464:31823	33301
SLG-2	iDAFWA136	0	25	AATTCAAGGATTTGTCAAAAAAAAAACTAAACTCTATTATTATTGAATAAATACATCTATTACTTTTTTCTTAATTAATTTCATTTTTTTCT-AATTCAAGGATTTGTCAAAAAAAAACTAAACTCTATTATTATTGAATAAATACATCTATTACTTTTTTCTTAATTAATTTCATTTTTTTCTT	scaffold21781:10863-A-i1	19057
SLG-2	iDAFWA582	0	32	AATTCTTCCTGACCTTAGGATATTGAGAAGTGCATTAGAGACAATAGGATTAACTTGAGAAATCAAACTTTGATAAATAAAAAATACTAGAT-AATTCTTCCTGGCCTTAGGATATTGAGAAGTGACAATAGGATTAACTTGAGAAATCAAACTTTGATAAATAAAAAATACTAGATTGAATAGG	scaffold7156:28592-CATTAGAG-i8	31689
SLG-2	DAFWA1476	0	41	AATTCCCTCTTTATTTATTCAAACAACTCCTAACAACAAA[C/T]CTCTTTTCTACTACCCTATGCCTACCCTATCAATACCCCACTCTAAAAGAA	scaffold36284:218	28971
SLG-2	DAFWA73	0	53	AATTCCTCAAAAGAGGAGTTTTGAAATTCTCCCCCATGATCACTTCGTATAG[T/C]AGTGATTTTTCATTTTGAACTCTTTTAGCATAAATGCTA	#N/A	#N/A
SLG-2	iDAFWA841	0	74	AATTCAGGCACTTTGAACTTGGGTGGGAGTACCACATCGGGCACCAAGCATATTTCGAAAGCATTCTTGAGGTCCGAACAATTGGCTCCTTT-AATTCAGGCACTTTGAACTTGGGTGGGAGTACCACATCGGGCACCAAGCACATTTCGAAAGCATTCTTGAGGTCGGACAATTGGCTCCTTTA	scaffold23490:8518-C-i1	12612
SLG-2	iDAFWA833	0	15	AATTCAAGCCAAAATTCAAGACAAAAGCTCAAAAATGAATTGCTAAGTAATCAAGTTAAAGCATAGCATGCTATGTGCTTAATTTGGTTACT-AATTCAAGCCAAATTCAAGACAAAAGCTCAAAAATGAATTGCTAGGTAATCAAGTTAAAGCATAGCATGCTATGTGCTTAATTTGGTTACTT	scaffold51146:946-T-i1	2980
SLG-2	DAFWA5308	0	19	AATTCATTTCACAATTCA[T/A]AACCTTAAATTAGCATGATTGATGATTCTTCGTGCCTAATTGACTTCGTTTCACATGGTTTAGTGATTTGGAC	#N/A	#N/A
SLG-2	DAFWA8648	0	22	AATTCCAATCTATGACCCATG[T/C]CAAAGGTCATGATTTGTGTTTAAAGATGCTTATATCTTGGAGGGTAAAAACAAAGTTTGCGTTGTTATGA	scaffold8705:3502	9878
SLG-2	DAFWA7452	0	79	AATTCCATTTTATTTGATCTCCAAGATTACCAAGATTTAACTAAACTTGTATGCACTTCGTTTAGATGATTAAGAACA[G/A]TAAATGCAAAGAA	scaffold39375:3926	6410
SLG-2	DAFWA3700	0	37	AATTCCTTAAGGTCAAAGTAAACAAAACAAAAAAAA[T/A]TTATGCCTCATTCAAAAGTGCACAAGTTTCAAAAAAGGTAGTCAAGTTTGACTAT
SLG-2	DAFWA5645	0	57	AATTCATAGAAAGAAAAAATAAACCACCATGAAAAGGGTCAGACCATATTCCAATT[C/G]GTGAAAATATTACATAAGAATGTAAGAAATTAAAA	scaffold18573:21966	31065
SLG-2	DAFWA6710	0	28	AATTCAAATGGCCATGTGGATCATTTT[T/C]GCAACCATGTGGGAGATGTGCAAGTTACTAAATTCATTCCAAACTCTTACCACCAGGTGGAAAT	scaffold10384:16599	36004
SLG-2	DAFWA564	0	31	AATTCCTGCGTCTGCATCAAGGAAACATGA[C/T]AGTTGGGGGATATGCTGCCAAATTTGAAGATTTGGTGAGATATGCCCCACACTACAACCAA	scaffold2202:18411	23718
SLG-2	DAFWA8572	0	66	AATTCTAATGGTTAATAACACACATGTTACCCGTGCATTCTAATAGTTAAGAACACATGTTATTC[A/G]TGCATTCATTCATATGATTAAGAAAA	scaffold77977:6943	7791
SLG-2	DAFWA8617	0	7	AATTCG[G/T]TTACAGCCTCTAACACATATGCTCTAATAACATCCCAGGCTACCTTGATGAAGTGTGAGGTGTACCCATCAATCCCTGGAGCTTT	C28723892:3776	4747
SLG-2	DAFWA5304	0	25	AATTCTGAAAAGATATAATCTTTT[T/C]ACTGAAAATTCAAAACCCACCAAGAAAAGTTCTCACCTTGCTAACCCCAATAAACAAATAACCTCAA	scaffold3237:19087	24069
SLG-2	DAFWA1974	0	81	AATTCTTCTCATGATATATCTTGTCTGGTCACTTTTAGAAGCCTTCAAAATGAGAAAGTGGTTTGTCCGGCAATATTGCA[C/G]TCTACATCACC	scaffold49064:11276	25329
SLG-2	DAFWA8647	0	90	AATTCAACTTATAATTTTTTTGAGGTTGTCATATTATATAAGGATGTCTTTAATAACTTCTGACATTCAATACACTTGTTTGTCAAATA[A/T]TT	scaffold92166:10071	10565
SLG-2	DAFWA5422	0	57	AATTCGGTTTATATAATTGGTTTTGAATTTGTTTATTGGGGTTAGGAGATTGTGAA[A/C]TTGTGATAGGTTGTAAGGTGTGGACTAGTGGAATA	scaffold3237:19164	24069
SLG-2	DAFWA6302	0	73	AATTCTCGTCATTCCCTAATGCATGCTTTCAATGTTTCGTAGATGACATGCAAGGCTTTTCCTTGCCTAGCT[A/C]CCTTTTTAGTTTTGGGATT	scaffold13062:6149	17642
SLG-2	DAFWA993	0	69	AATTCAAAACAAAACCCCAATTGAATTTTTAAAGACGGATACGAAATTTGGCAAAATGAAACAGTTTT[G/T]ACAAGTAACTCTAATAAACACAT	scaffold82537:1024	2689
SLG-2	DAFWA5475	0	62	AATTCAAAATGTATAATGGGACCACTTGTCCCAAAAGTCATTTGCATATGTTCGCCAGGAA[C/G]ATGTCAGTGTACCATGGAAACGATAAGCTC	scaffold23490:8387	12612
SLG-2	DAFWA5434	0	63	AATTCTCCTTCATCAGCTCGGGCATCCAATTCTACCATGTTCACACCCCTTGGCCTTTTTTG[G/T]TAGGGGCAACCCTCCTCTTGTTGCTTGAC	scaffold26781:2529	12082
SLG-2	iDAFWA83	0	45	AATTCTTAAGATTCATTTATCATAATCATAGTTACAAGTTTATGTTATTGTATAAAGGTTTCTCATTGTATTGTTCTTCCTATGTAATAATT-AATTCTTAAGATTCATTTATCATAATCATAGTTACAAGTTTATGTATTGTATAAAGGTTTCTCATTGTATTGTTCTTCCTATGTAATAATTT	scaffold37563:21026-T-i1	22237
SLG-2	iDAFWA70	0	19	AATTCTTGGTGGAAGAAGTTGTTTTGTATAAACATTTGATTTCTTCTTAGCAAAGCAAATCTTCCAAGATCAGAAGGGGGGATTGGATGTAG-AATTCTTGGTGGAAGAAGTGTGTTTTGTATAAACATTTGATTTCTTCTTAGCAAAGCAAATCTTCCAAGATCAGAAGGGGGGATTGGATGTA	scaffold29225:10207-G-d1	16681
SLG-2	iDAFWA827	0	69	AATTCAACAACCAGGTTTTAAGCTAAAATCAAATCATCAGTATTCATCTTCTTGCTCTCTTTATTTTTTATCATTCTCTTTCGCATTCTTCT-AATTCAACAACCAGGTTTTAAGCTAAAATCAAATCATCTGTATTCATCTTCTTGCTCTCTTTATTTTTTTATCATTCTCTTTCACATTCTTC	scaffold80990:2332-T-d1	6980
SLG-2	DAFWA4623	0	92	AATTCGGTTTGAGAGAGAAGTGAAATGTGAAAATGTGAATTAGAATGACAATGGATTTTTCAAGCGTTGAAGTGCCTCCTATTTATAGGAG[C/T]	scaffold2546:11006	17223
SLG-2	DAFWA7813	0	18	AATTCGTATTTTACACA[C/T]CATTCTGTCTATATGATATATATGCATTGACAATGGCATCTTGATGGTTGAGATACTGCTATGTTGGCATTGAA	scaffold92166:4393	10565
SLG-2	DAFWA6793	0	37	AATTCAATATTTTGTTATTACATTTACGAATTTATG[G/A]CGCCATTCGATCCTTGTAGCCAACCTTATCTAATGGGTTAAAAAGACTTGGTTAT	scaffold54801:7801	15324
SLG-2	iDAFWA760	0.257	59	AATTCATGAAATTTTTTAGCAAGATGAATTAAAGCCTAAAGTCCAACTCAATTGCAAAAGTGAAGAATTAACCCAAGTTGGCCAAATCACGT-AATTCATGAAATTTTTTATCAAGATGAATTAAAGCCTAAAGTCCAACTCAATTGCAAAAAGTGAAGAATTAACCCAAGTTAGCCAAATCACG	scaffold2839:2442-A-d1	7390
SLG-2	DAFWA1362	0.457	20	AATTCAATACATTCAAGTT[A/C]TTACTTTTGGTTAAGTTTTGATTGTTTACGAAGTTCTTAATGCAGTTTTAGCTTGATCACCTAAATCTTGAT	scaffold2979:10141	24294
SLG-2	DAFWA588	0	27	AATTCCCGAGGAGTGCTCTTGAGATA[A/G]GTAGGATATTGAACTCTCATGTGTCCTGGCTTACCACATTTGTGGCATGTGAAACGCTCTTTGTT	scaffold12818:17646	48854
SLG-2	iDAFWA400	0	52	AATTCTGTATGAAACTATTGTTCTTCTTTGAGAAGAATTTTGGCACAAAAAAATGAAGACTTTTGCAAATGGGTATGTGTATGACAGCAAAA-AATTCTGTATGAAACTATTGTTCTTCTTTGAGAAGAATTTTGGCACAAAAAATGAAGACTTTTGCAAATGGGTATGTGTATGACAGCAAAAA	scaffold18339:1019-A-i1	16127
SLG-2	DAFWA4789	0	10	AATTCTTTC[A/G]TCAAGCCCCAAAGTTTGAAGGAGGTTTCTCACTAGATGTTGCAAATGACTGGATCCAGGTGTTGGAAAGGATCTTTCAGGCA	scaffold14302:25833	27839
SLG-2	DAFWA342	0	53	AATTCAACAATTAAAACTCAATCTAAAACACTAAGGAGAAAATCCACAAGAA[T/C]CTAATCTAAATAAAATTTAATGCATTAGGTTTTCATATA	scaffold21372:8950	12289
SLG-2	DAFWA1466	0	51	AATTCCAAGTTCTCTTCTAAGAACAAAGAATGAGTCTTGTGGAAGGGGTT[T/C]AGTGAAAATATTCGCTAGTTGTTTAGTGGTTTCAACAAATT	scaffold3734:25933	31562
SLG-2	DAFWA8641	0	14	AATTCAGTTTTAA[T/C]AGATAACTGAATACCTGAAATCAGTTAATCTTGCACCATGCATCATATATAATTCATTTTAGAATTGCTAAGTTGCAT	scaffold23255:2469	23190
SLG-2	DAFWA718	0	75	AATTCCAAGAACCTCTAACCTTGGTTTGACTATCCCTATCGCCTGAGAAAATATTTCTCACGATCCAGCCCCAT[G/C]CAAAATCCTCGCTCTAA	#N/A	#N/A
SLG-2	DAFWA4039	0	16	AATTCTACAGTCACA[A/T]CTTTCTTTTTGATGAGCAATATATTACACACTATTCATAACCTTAATTTAGCCTGATTGATGATTCTTGGTGCCTA	#N/A	#N/A
SLG-2	DAFWA2468	0	37	AATTCATGGCAAAACCAAAAACCACTCATTATTATG[T/C]TGATCTAAGAGTTATCAAATACCTCAAGGGAACCTCTTCCTTAGGCCTTTTCTAC	scaffold3385:5116	15781
SLG-2	iDAFWA781	0	64	AATTCATAATAATCCTTAAGCCTCAGACATATTTCTTCATTTAGTGCAATTTAAGAAGCAATGCCTTCTTGTGAGGAATTTGGTGAGTGATA-AATTCATAATAATCCTTAAGCCTTAGACATATTTCTTCATTTAGTGCAATTTAAGAAGCAATGCGCTTCTTGTGAGGAATTTGGTGACTGAT	C28713992:348-G-d1	4048
SLG-2	iDAFWA606	0	67	AATTCTAGGTACCCACATTGTTAGGTTCATGGAGAAAGATCAAAATAACATGTTTTCATAATATTAATGTTGCATCATAAGATGATTAATTA-AATTCTAGGTACCCACATTGTTAGGTTCATGGAGAAAGATCAAAATAACATGTTTTCATAATATTAAATGTTGCATCATAACATGATTAATT	scaffold30879:17290-A-d1	18215
SLG-2	DAFWA1409	0	68	AATTCCCAGAACCTCTACCTTGGTTTGACCTTACTCAATCGCCTAGGAAAACCTTTCCTACAATTCA[A/G]CCCAAAGCAAGAGTATGTTCTAAA	scaffold8603:1576	10641
SLG-2	iDAFWA297	0	24	AATTCTACTTTGATCATTTTTTTTCTCTTTAAAATGTAAACTCATTAATTAGGTAACCATTATGAGATTAGACTTGAATACTTGGACCATTG-AATTCTACTTTGATCATTTTTTTTTCTCTTTAAAATGTAAACTCATTAATTAGGTAACCATTATGAGATTAGACTTGAATACTTGGACCATT	scaffold18555:23274-T-d1	26911
SLG-2	DAFWA1504	0	52	AATTCTAGCACACAATCACCTTTTCGAACATGATCATGTAAAAAATGATGC[C/T]TTATTTCTATATGCTTCGTTCTTGAATGAAAAACAGGATT	#N/A	#N/A
SLG-2	iDAFWA844	0.414	51	AATTCAACTTCATGCATGTGCTTAGTTCTTGGTATCATTCTGTTCTAGGTGGTTAGGTGTTAATCACGAAAATCTAAGAGTTTCAAAGCTTA-AATTCAACTACATGCATGTGCTTAGTTCTTGGTATCATTCTGTTCTAGGTGTGGTTAGGTATTAATCACGAAAATCTAAGAGTTTCAAAGCT	scaffold2684:17492-TG-d2	18718
SLG-2	DAFWA8061	0.3	82	AATTCCACCAAACATTGCAGCCTCATACATAACCCTACTGCTGAAGAAATAAAGTGTCTCATTTGAAGCATACTCAAACAC[T/C]AACATCCTTG	scaffold21673:7513	17074
SLG-2	DAFWA5164	0	6	AATTC[T/C]CTAAGCTACAATCTGTGCAAAAATCTACTGTACATATGTTATACATTGATTTCCCTAAACAAAACTAAGTACATAATGTGATCAAT	scaffold14572:17858	31169
SLG-2	DAFWA2140	0	52	AATTCATGTTCTCTGATATACTCCTTTTATATATCTTTTGAGAGAGTTTTG[G/A]TATGGTGACATTCCTCAATCAAATCCTTAATTCATTTTGG	scaffold17633:6042	7224
SLG-2	DAFWA5102	0	22	AATTCTATTTTTCTTCTCAAC[C/T]AAAAGTAATTGAATTATTTATCTCCTATTAGCCAATAGTCATTCAATGTAGTTGCTGGACATGTAAGAAA	scaffold7683:13028	22830
SLG-2	DAFWA1763	0	47	AATTCCTGTTTGATATTGACTATGATGAAGCTGGGTATGATTTAAC[A/T]CTGAAGACGACAATGGAAGATCCTCTAACCAAAGCACATTTTCAT	scaffold96630:3198	5375
SLG-2	DAFWA7493	0	70	AATTCTCACTTAAAGTACTCAAACATAAACCGATTATAATTTTAACATTTTATAATCACACAATTTATA[G/A]TTTCATATTTTATAAAATAAAA	scaffold61776:7535	10737
SLG-2	DAFWA7685	0	45	AATTCCAGAGAGTATCTTGCACAATGAAAACCCATACAGTGCAA[C/T]ATGCAGTACTATAAGCTTGCCATGCGAAGTCGATCTCGACCTGTATG	scaffold98012:8429	19828
SLG-2	DAFWA7959	0	65	AATTCCAAAATGAAGGCTATCTAAATACGACCACATTATGTAAAAGAAAGAAAAAAATGCTACC[T/A]CATTCAATGGAGCAACTAACAAAAATA	scaffold81400:9194	10094
SLG-2	DAFWA1155	0	92	AATTCCTAATGATGCCGTTTGGGCTCACAAATGACCCATCAACCTTTCAATCAACCATGAATGACCTATTAAGGCCCTACATTCGAATTTT[C/T]	scaffold48581:5765	6107
SLG-2	DAFWA4772	0	81	AATTCTTCAACACCTATTTTCACCCTTTCCACCAGTGAAGGGTTGACACCATGATTGATAAGCTGTAATTAAAAATATTG[C/T]ATAGGAAGTGA	C28755904:14280	16563
SLG-2	DAFWA12	0	69	AATTCTACCACCTACAATACACCTCACCACACCATAACATATGTTATTATCTCTTGATACATATCATT[G/A]TCCTTTATTCTTCTTCTTTATTC
SLG-2	DAFWA5230	0	64	AATTCTTTATAGTATCAAATTTCAATTCCGCTAAGGAAATGTGGGATACTCTAGAGACCACTC[G/A]TGAAGGAACTTAGGAGGTAAAAAGGTCT	scaffold33555:22576	28865
SLG-2	DAFWA791	0	71	AATTCCCAACTGCTTTTCATTTTCCACTCTGAACCTATAAACTTTTGTTACTATATAAGATCTCAACTTG[T/C]TTATTAACTTTTAGCTATTTT	scaffold2832:9535	29797
SLG-2	DAFWA5676	0	90	AATTCATTTGGTCAAGTCAAAATTTTGTGAAAGTATTACGACCCGAAGTGAGAAGATAGCAGAAGGTGGAGTTGAAAAACCAAAAGAGA[G/T]AT	scaffold5132:6618	11149
SLG-2	DAFWA7342	0	88	AATTCCTTAACATCTCCTTTTGTATTTCAACATATGGCTCAACCTCGTCGGCATCATATAAAACATATAAGTGTATTTGCTCCAATT[T/C]GGTT	scaffold2077:35891	39207
SLG-2	DAFWA7370	0	57	AATTCTTCTTAGAGGAGAAAATCTACCATGCTGTCAATTGCACACTAGTAACAATG[A/C]TGCTAAAAACAAATGATGTGGCCACCATGAAAGAC	scaffold56900:2848	10154
SLG-2	DAFWA8690	0	46	AATTCAATGAAACAAATGTATCAAGGGTCCACGAAGGTGAAAATG[G/A]CACAACTTCAAGCCTTGAGAATGGAGTTTGAGCTGCTTGCCATGAA	scaffold11382:6414	25373
SLG-2	DAFWA4554	0	91	AATTCCCTCAGCTGAATGATGAATGTTTTTGAGTTAAATGGCCTAGGATGCCATTGGTATGAGTTTTTTCAGCAAGCCAAGCTTCCAACA[G/A]C	scaffold34854:2766	16838
SLG-2	DAFWA1047	0	33	AATTCTATCTTAGAATAGTCTCTATGCAAAAG[T/C]GGTGAATTTTGAGGCGGCTTTGGACTGCCATAAGAGTTTGAGAAAGTTCTGATTATTCA	scaffold4834:9270	25131
SLG-2	DAFWA4851	0	86	AATTCTGTTATGTTACTTCCACTCTTTTTATGAGATATAATTTATTTATGTTCACCTCATCTCTAGTGCTTTCATTTAACCTTAG[T/G]GAAACC	scaffold62195:2209	10441
SLG-2	DAFWA8611	0	56	AATTCATTTTGAAGAGCAGCGATCCTAAACATATCTCCATGAGAGAATCTGTCAT[G/T]TAGGTCTTTCCATGCCTCAGCTACAGTATCTATCCA	scaffold60766:1036	7743
SLG-2	DAFWA5371	0	16	AATTCATGTGAATCC[G/T]TTAATCGATTAAGTATGGATTTAATCGATTAAGGTTTGTTGCTATTTCTATTTTCTGTTATATTTTGAAGAATTGT	scaffold50807:5450	14038
SLG-2	DAFWA6275	0	71	AATTCTATACTTACCACTATCAGTATACTATACTCAACAACAATAACCGAGTCTTTATCTACTAAGCAGA[T/G]CTAGTTTCATGAATCAAATGA	scaffold93078:5180	8447
SLG-2	DAFWA1618	0	59	AATTCTTCTATGTGAGACTTGAAAGTTTTTTATATTTCACAACAAAAAAATTATAATT[A/G]GTTTCTAACAAACCAAATTCCAACAAACACTTT	scaffold6904:10543	36088
SLG-2	DAFWA1351	0	49	AATTCTAAAACAAGATTGGCTCTAAGGAATCTCTGTAGTTTGCATAAT[C/T]CGGATTTGGTTTTTATTTCAGAAACTAAGATCTCTTCGGAAAA	scaffold2077:22496	39207
SLG-2	DAFWA1783	0	6	AATTC[A/T]ACTTGGATTGCTACAAAGCCATTCGATAGAAAGATCAAAGTAAATGTGTCAATTGATAATCGTACCACGAGAGTAGGTGCGACTTC	scaffold14572:26604	31169
SLG-2	DAFWA6991	0	34	AATTCCCGTGTGGTTAGATGCAATTTTTTACTT[C/T]AATTTCCCTATCCATGCATTTATTTTGCAACTCAGAAGCCCATTCACAAACTAAACAA	scaffold34854:8536	16838
SLG-2	DAFWA8179	0	63	AATTCTGTGAGAAGACACATGTAACAATCAATCATAAATACATGAACCACATCTATCAACAT[T/A]ATTCAGAAAGTAAAATCACATTACATACC	scaffold12428:8034	13616
SLG-2	DAFWA7683	0	9	AATTCCCT[G/T]ACACCTACCTTCTAATAGATCCACACCACTTCTAACCAAGTATACCCAAAGAGACCTCTTCTTGGATCTTGACCGCAACCTAG	scaffold52690:344	8788
SLG-2	DAFWA4337	0	81	AATTCCCATATAGTTACCAAGATTACTAACCACACGCATTGAAGTGATATTCATGAAATTATTTTTCCTCCTACTAGTCA[T/C]AGTCTCCGAAC	scaffold6395:5223	9200
SLG-2	DAFWA6720	0	89	AATTCTTTCTGGTGTCCCAATGTCAAAGTGCCAAGGTAATGTGGGATACTTTACAAGTGACTCACGAAGGCACTAGCGAAGTCAAGCG[G/C]GTC
SLG-2	DAFWA8501	0	35	AATTCAACAAAATGATATGCAATGCTACACGTTT[C/A]TGCAAGTTTAACAGAATTTATACAAAACAAATTTGGCTCTACAAACCATTTTTCAGT	scaffold31567:5820	7544
SLG-2	DAFWA5474	0	26	AATTCGCTAGAGTCTAACAAGACCT[G/A]GGATTTAGCTGACTTGCCTCCTAGTTGCAAACTCATTGGTTGTAAGTGGATATTGAAAAAGTAACT
SLG-2	DAFWA5931	0	64	AATTCTCAATTCTATTATGAAGAGGTGATAGGTTTTATTTTTTACATTCTTGAAATATCCTAA[A/T]TGCTCGTTGTAATACCTTTAATTTCTCT	scaffold8896:7412	31562
SLG-2	DAFWA7503	0	73	AATTCTTGTTTTTACTTTTAAGGATAAAAATGTCATTTCATCGTAAATAAAAGGATAAGTGTTATTGCATGT[A/T]GTTTTTGCACTACTTGCCT	scaffold59906:1611	2936
SLG-2	DAFWA5448	0	10	AATTCAAAC[A/T]ACATTACAACATTATTCCCGAGTATTTGTTTCTTTAATATGGTTCAATTCGAACGATTCCTAAATTTCCAAAATCATGAATC	scaffold85086:792	6185
SLG-2	DAFWA1835	0	92	AATTCCATGAGCTGGAGAAAAAGTACCTCGAGGCGCTGAAGGTTCAAGAGGAGCAGAACCTGACTGCTGGTGAGCAACTGTTAGCGATGAC[G/C]	scaffold44543:5599	11748
SLG-2	DAFWA5492	0	59	AATTCAAATGATAAACAAAGTAAGAAGAGAAATGAAGGAGCTTGATGCAAACGAACCT[T/A]GTGGAAAGGAAATAGGCTTTAACAGGGATTTTA	scaffold97681:777	5449
SLG-2	DAFWA1093	0	87	AATTCAATTCCGAGTTACAGATCTCAAAAATCACATTTGGGCTGAATTTAGGGTGAATTTGGGCCCAAAAAAGGCCCGAAGACTTT[T/C]CGTCT	scaffold19299:971	10030
SLG-2	DAFWA5619	0	91	AATTCAGGGTTCCGGTTCGGATATCATGGGCTAGTTCAAACCAGTTAAGTTCGAGGAATCGGATTGCTCGAAGGAGGCCGGAGGCGAAGA[C/T]T	scaffold78841:2566	5638
SLG-2	DAFWA6296	0	89	AATTCAAATAAAAATTATATTAATATTCTGCATAGGAATATGCATTCGTTCCAATATTTTCGAATTTGATTTAACATATATATCCATG[C/T]CAT	scaffold40400:13625	23608
SLG-2	DAFWA7713	0	14	AATTCACTAAGCT[A/G]CCATCAAACAAGAGAGCAATATATGTTAAGTGGGTTTACAAAGTAAAAGTAAATCCAAAAGGTGAGGTGACTAAGCAC	scaffold32138:2291	11323
SLG-2	DAFWA5488	0	39	AATTCATGACTTTATGGTTGCTAAGCAACAACCTTACC[A/G]TGCACTTGCCCCAAAAATAAAATAAAACATTTATAAAATACGAGTCTGGGATG	scaffold13857:35538	46556
SLG-2	DAFWA8196	0	48	AATTCTATTTCTTTCTTTGTTCTCATATCCGCAGGGAAGTACTTCAG[C/A]AGAAATCTCTCCTTGAAAGTTGTCTAGTTGACAACTTGTTGTTC	scaffold45726:4507	5413
SLG-2	DAFWA3575	0	62	AATTCAGAGTGAAAAATATTTAGAAATGCGTTATTGATGAACTTGATGTCTATCTTGAGTC[G/A]AAATAATACTTTGAAGCCAATGACGCAATC	scaffold1329:3470	14051
SLG-2	DAFWA8568	0	30	AATTCAATTAATGTTCAATGTAATGTATA[G/T]GATTTGGTCTATGTAATATATGTTTATGTAAACATTACAATGTAATTAATCTTCAATATATA
SLG-2	DAFWA138	0	26	AATTCTCTCAATCAAATTTAATTCA[T/C]GAACTTAGTGTCTTAGGAAGTATAAATTCATGTGAATTGTTAGACTAACCTCAAAGCAAAAAGAAA
SLG-2	DAFWA5671	0	29	AATTCAACAATCTGCAGTTAAGAATAAT[C/T]GGTGACCAAATTGTGTCATACATCATATGGGTAAAGTGAACATTTGTAACACAATCATGTGTT	scaffold87398:2097	4506
SLG-2	DAFWA2823	0	16	AATTCTCAAAACTCT[G/A]AACTCATTGGTAAAAAGATAAATAATATATATATGATTGACATAGACTCTTTCTCGTGATCCAGCCTCAGCCAAGA
SLG-2	DAFWA1414	0	86	AATTCTTGGGAACCCATTAATCGATTAAGTATGGGTTTAATAGATTAAGTTTGTTATTGTTTCTGTTTTCTGGTATTTTCAAGAA[T/C]CGATAA	scaffold60338:5073	5204
SLG-2	DAFWA6229	0	62	AATTCAGAACGTGTACGACATTATATCATTCATTTTTAGAAATTGCTAGGTGCATATTTTC[G/A]TGCTTAATTGTGTCATATAGGTAGAGTGAA	scaffold15735:1068	5678
SLG-2	DAFWA5543	0	77	AATTCCATATGTCCTTAAGCGCACCTACAAAACACAATTACTTGCTCTTCTTGGGTACCCAACTAAACTTGGGTCC[C/T]TTGATGTTAGTAGCT
SLG-2	DAFWA6247	0	92	AATTCCAACACCCAATTCCAAATCATCCCTTACTCTTCTAAACAATTGGTGTCTCTTTTCTAAGATGAATAATATTATATCTTTCTTGTAT[A/G]	scaffold34854:1312	16838
SLG-2	DAFWA4992	0	13	AATTCCAAATTG[T/C]ATTCGACGTTCCATTGTCAAGAATTGTTTTTAGGATTTCTCTATCAATTGCTTGGAATAAGAAGTTATTGACCTTCAGA	scaffold11382:6468	25373
SLG-2	DAFWA4033	0	41	AATTCAAGTGATATAAATTTGTTGACTTGTATAGTATATT[C/T]ATTCATTTTTTTGGTTGACCAGTTAAGAATTGTTGAATCTGTTTGTTAATT	scaffold40185:3576	7784
SLG-2	DAFWA7866	0	53	AATTCAACTAATGAAAGACTTCAAATAATAGCAATACTAATATAACTATGAT[T/G]AAAACAGAAATAAACATTACTGGCAAGAACATAACGTGG	scaffold29645:6933	8068
SLG-2	DAFWA6682	0	25	AATTCTAATCTCAATGTTGAGATT[C/T]ATCAAATTTCATATATTTCTTGTATGAGATAGTACTAGTTTCTGGGTCAATCACTTTATACGCTCAT	scaffold94013:6733	13315
SLG-2	DAFWA4109	0	36	AATTCTTTGTGAATTAAGGATTGAATCCTTGTGAG[A/T]GTATTCTCCAAACCTTCTTGGCTGAACCAAGATTATAACAAGTTCTTGTGGTGAGC	scaffold14572:25863	31169
SLG-2	DAFWA6358	0	68	AATTCGTGATTTATTATATTGTATAGGAAAAAGAGAGATGCATGTGTGACTAAAAGAGATTAACATG[C/T]GTACTTCATATTGTTCATGATGTA	scaffold31567:5722	7544
SLG-2	DAFWA4692	0	39	AATTCTAACAAGTTGTCTTCTCAAATTGTGGTCAACTG[G/A]AGAATGTGAGTGCTATCACTTTAAGGTCAGACAAATAAATTGAAGTTGATCTC	scaffold20933:7854	16527
SLG-2	DAFWA6809	0	59	AATTCATTCAAGAGGAGGTTTATGTTGAGCAACAGTCCGGTTTTGAAAACTATAAGTT[C/T]CCGAACCATGTCTATAAACTTAAAATGGCAATT	scaffold11382:20643	25373
SLG-2	DAFWA3058	0	71	AATTCAGAGTATTAAAACATCAAATCCATATTATAAAAAAATAATCATCCTCAATCTAAAATTAAGATAA[T/C]AACATTCTTATTTGTATTAAA
SLG-2	DAFWA4388	0	22	AATTCTCTGAGTGAAATCTTT[C/T]GTTGATTTGAATTAGTGTTTCGTTAAAATTCAAGAGAGAAAAGAGATTGAATTTTCATATTTCAATAGAG	scaffold44543:3747	11748
SLG-2	DAFWA4760	0	37	AATTCCTTACGATCGGTGAAACACTGATCCTAGGAT[T/C]TTGAATCTCATGATTCTCACACACATATATGAAACAAAGAGTGCTCATACCTGAA	scaffold2832:4836	29797
SLG-2	DAFWA8403	0	21	AATTCACAGAACAAATGTGA[A/G]GAAAATGAAGGAGAACTTTCCCTATTTATAGACGAAGTTGGGTCAGAACCGCCCTCGTGGCTCAAATAAAA	scaffold27267:3086	7231
SLG-2	DAFWA7930	0	50	AATTCTTTTGGCTGAAATCATGTGAGAGTGTGTTGGGTAACTCATGAAC[C/T]TACTAATCATACCTACACTGAATGATATTCTGCTCTAGAGTG	scaffold2450:9523	12266
SLG-2	DAFWA5133	0	29	AATTCTACTTTTATTTGTCATCACAACC[A/G]TTGTGGTGCTCTTTATTTCATCTCCATTACAACCCATGGCCAACCATTGTGGTGCTCTTTATC	scaffold8896:18819	31562
SLG-2	DAFWA2483	0	36	AATTCATAACCACAAAAGATTCAATTAGGGGAGAC[C/A]CTACACGGTTTTTCAAACCCAAACCCCAACCATGTTTGTTAATGAAAGTTATATGC	scaffold36865:10455	30121
SLG-2	DAFWA3076	0	92	AATTCTTTGTATACTATTGTTATTATTGTTTATATTATTTTTACTATCCATATTGTTACTATTTCTTTTAACTGGTATTCACGTTATTAAA[T/A]	scaffold33002:8128	11042
SLG-2	DAFWA2428	0	25	AATTCTGGTATGATGACATTTCTC[T/A]ACCAATTCCTTAATCCTTTTGGGACATTCGTTTTCTCTCTGATGGGGAAATGTGAAAACTATTTGTG	scaffold6462:4235	5775
SLG-2	DAFWA2167	0	67	AATTCTGAAAATGACTTGGTTTGTTGGAGCTGAAGTTAAAGGTAGCTTGGACTTGGTTTGGTACCT[G/A]ATGTTTTATTTTACTTAGGTGAGTA	scaffold39811:14584	16158
SLG-2	DAFWA8773	0	34	AATTCCTATGAAGAAGAGAGGAATTAGAACAAT[A/G]TTACTATCAATGACCAAGAATTACAATAAATTCAGCTTTGAAGAGAGAAAGAAGAGAA	scaffold95443:4236	8479
SLG-2	DAFWA1594	0	65	AATTCCTCTTCAAAATATACCTTTAAAGGACTACCAAGATATAATCTGTTTCTTATTAAAACAT[G/T]GATAAGAAAAAATTAGTTGATTGAAAG	scaffold22123:10552	11141
SLG-2	DAFWA4189	0	85	AATTCCCCAAAAGCACTTTTAGCCTGACAATTCAATTTACATCAATGCCAGACAAGAATAATGAATATTTAGAAGTGAAATTCA[A/T]GTTTGGT	scaffold58910:2297	12260
SLG-2	DAFWA8807	0	87	AATTCAATTAATGTTCAATGTAATGTATATGATTTGGTCTATGTAATATATGATTATGTAAACATTACAATATAATTAATCTTCAA[T/A]ATATA
SLG-2	DAFWA5340	0	57	AATTCATCTTCTTTCTTCAACCTTACGGGTCCAAAATTTTTCCAAATTGATAATTT[A/G]CGATTCGAGCTTGGTATGACCCTTTTTCTCTATGG	scaffold33213:2136	17254
SLG-2	DAFWA3741	0	33	AATTCCAGTTTAAAAGAAAAACTCACAAAGCT[C/G]ACACACAGTAGAGATAATCTAGACATATTACTTGATGAATCAAGAAATGCTGATAACCA	scaffold11382:18778	25373
SLG-2	iDAFWA273	0	24	AATTCCCTCTTTTAACATACAATTATTTTCCTATTTTGACAAGTGACCCAACTATTGGATTATAAATCAGAAATAACTTGGATGACTTCGTA-AATTCCCTCTTTTAACATACAATTCACACATTTTATTTTCCTATTTTGACAAGTGACCCAACTATTGGATTATAAATCAGAAATAACTTGGA	#N/A	#N/A
SLG-2	iDAFWA240	0	74	AATTCAGCTTACTTGTGACATCAAAGATTATGCCATATATCAAAAAGAAAGGATAATGAGGTTAACAAAAAAATATGAGATTTTACCTCTTT-AATTCAGCTTACTTGTGACATCAAAGATTATGCCATATATCAAAAAGAAAGGATAATGAGGTTAACAAAAAAATGAGATTTTACCTCTTTTG	scaffold65115:8410-AT-i2	12441
SLG-2	DAFWA796	0	10	AATTCTTCA[A/G]TCAATTTTATGGCTCAAATTACCAAATTTGTGTGAATACTTTTATGTATGTTACTAAATTGTTATATATATTAATACATACT	scaffold85086:807	6185
SLG-2	DAFWA943	0.342	68	AATTCAAACTCAGGGCCAAAACATGAAGATCAAACCAATTATGAACTTTCCTTTTTAAGGCCAAATC[A/C]TAGGAGAATTCGTCCATATCAATT	scaffold65115:4467	12441
SLG-2	DAFWA265	0.371	47	AATTCATTGTCGCCAGTGCGTGTTGCGCTCAAATCCTATGGATGAA[A/G]CAGCAACTTAAGGACTTTGGTCTTAAACTAGAAAAGATTCCCATT	scaffold37346:1085	4676
SLG-2	DAFWA3904	0	16	AATTCTAGGGGAAGC[C/T]CTAACATGCACTGTTGTAAAGGATTAATACAATAATGCTTTTTATAGACAACGATGTTGTACATGTATGAAAGGAT	scaffold1591:2584	18921
SLG-2	DAFWA3420	0	68	AATTCGTCCTTGAATCAAAGTCTTCATCACCTGCATCTAAAAGAGAAAGGTCAGCAACATTAAATTT[A/G]GCACTAATGTTTCCGTACTCACCT	#N/A	#N/A
SLG-2	DAFWA3989	0	80	AATTCGGGTACTCATTATCATCCCTAAATAAAAATTATTATAAATGAATACATGGTGCACAATATAATGTCATAAACTC[A/T]CTTATGCCTTAA	scaffold95546:693	4105
SLG-2	DAFWA3267	0	20	AATTCTTGATGAACAATAT[C/A]TTGATTAAAATTGTCTAGATGTTTAGTTTATGTCTTGCTTCTACATGTTTATTAGTCTCTTGTTTTAATGAA	#N/A	#N/A
SLG-2	iDAFWA792	0	55	AATTCCTGAAGCTTTAATAGGGGAGTTTGTCGGTGGGAGGGTATGCCGCCAAGTTGAGGAATTGGCGAGGTATGCCCCACATTACAACGAGA-AATTCCTAAAGCTTTAACAGGGGAGTTTGTCGGTGGGAGGGTATGCCGCCAAGTTCGAGGAATTGGCGAGGTATGCCCCACATTACAACGAG	scaffold26083:1261-C-d1	3591
SLG-2	DAFWA1977	0	78	AATTCTTAGCCTAACAGAAGAATAAACCTCACCCTCTACCCACATTGCACTTCTTTTGATCTCATTTCCTCTCAAAT[A/T]TGTCAAGGAAACCC	scaffold7192:6214	15109
SLG-2	DAFWA893	0	16	AATTCAGTGTTCATC[C/T]TTGATTGCATCATCAATCTTGAAAGGTTCTATTTGATAAACGAAGGCCATGTTTAAACAAGCATCATTTAGCTTTA	scaffold7595:737	14380
SLG-2	iDAFWA335	0	37	AATTCAAGCTCTTGTCTCTTGCTATAATTGCATATTTTGCATTGTCATCAGCCTCACCAATTCTTTCAATGAAGGCTCAATAGGTGTAGGTG-AATTCAAGCTCTTGTCTCTTGCTATAATTGCATATTTGCATTGTCATCAGCCTCACCAATTCTTTCAATGAAGGCTCAATAGGTGTAGGTGG	scaffold74268:13690-T-i1	24235
SLG-2	DAFWA6385	0	79	AATTCAAGATTTAATCTCATGATTATATCAATTACAAACAATGTTTGATATATAATATATATGCATGAAATTTTTTCA[G/C]TACACCCAATTTC	scaffold2413:321	20853
SLG-2	iDAFWA785	0	69	AATTCATTATAAATGACTCTTTACTAGCATACTCAACCAATGTGACTTTAATTAACACTTGATACACATATGTGTGTGACTATTAAATGATT-AATTCATTATAAATGACTCTTTACTGGCATACTCAACCAATGTGACTTTAATCAACACTTGATACACATGTGTGTGACTATTAAATGATTGT	scaffold37506:3683-AT-i2	9656
SLG-2	DAFWA6624	0	7	AATTCC[A/C]CCTAGTTGGAACATCCAAACACACAAGACTTTTAGACTTAATCTTTTCAGATTTAATGCATTCTTTAAATCTATTTAATCATAGG	scaffold5527:3087	9570
SLG-2	DAFWA6391	0	81	AATTCTCTCTACCGATCACGAAATGCGCAAGGGGGTGTCAGAAATTACTTAGTTTGCATGTAGGACTATCCTGGTCATAC[A/G]GTTTATAAGAC	scaffold8524:16209	24847
SLG-2	iDAFWA393	0	50	AATTCAGAAAACAATTACTGACAAGTTTGTTCAAGAATTGATTGATTCTAGTTTTGTATAGAACAATAATAGCCTTTATTCAATTCATGTGG-AATTCAGAAAACAATTACTGACAAGTTTGTTCAAGAATTGATTGATTCTATAGAACAATAATAGCCTTTATTCAATTCATGTGGTACTAGTA	#N/A	#N/A
SLG-2	DAFWA6699	0	71	AATTCTAGCCGCCATCGTAATAGACAATGACACCCAGTTTTTAGATCGAAAATTCTAAGAGCTGCTATCC[G/A]GCTTACACATCAAACAACACT	scaffold13487:17159	19493
SLG-2	DAFWA8715	0	48	AATTCATTCTTCAAAATTGTATCCATTTTTCTATGTATATTTTTACC[G/A]TAGGGTGTGGTGAATGTAATCTAGAGATGAAGTCTGAGGGTGTT	scaffold10738:7574	8358
SLG-2	DAFWA464	0	78	AATTCTGCAAACATTCTGCATATAACAATAACAAAGTTCAATCACATTATGGGAAATAAAGTTCGCTCATTAAATGA[C/T]AATAAAGATTAAAA	scaffold80037:348	953
SLG-2	DAFWA1252	0	40	AATTCTTGGTTATGTCTTAATGATGGTTAATACAATTGC[G/A]TACATAAGCGTTCATAAAAAAACGAAAATGAAAAATAAAAACAACAAAAAGA	#N/A	#N/A
SLG-2	iDAFWA206	0	21	AATTCGCTTTTTGTTGTTGTTTCAATTTCATAAATGATGTTACAATTGTTTTTACTTGTTCTTTTGATATTGTTTACGAATATCTTGCTATT-AATTCGCTTTTTGTTGTTGTTGTTTCAATTTCATAAATGATGTTACAATTGTTTTTACTTGTTCTTTTGATATTGTTTACGAATATCTTGCT	scaffold11731:29570-GTT-d3	35036
SLG-2	DAFWA4243	0	7	AATTCT[T/G]GATGAACAATATCTTAACTTGTTTGGTTAATGGTATTGTGTGCCTTTGCATGGTTATTATGCTTATCTATGTGATATATGTTGAA	scaffold21340:16039	25537
SLG-2	DAFWA3388	0	88	AATTCTCGGAGTCACTATAGTTGGGAAGCCAACTTCTACTACAATAGAAGGAGTTCTATACATGGAGGGACTCAAGCATAATTTACT[A/T]AGCA	scaffold17396:23476	30450
SLG-2	DAFWA2214	0	38	AATTCTCCTTCGTCGACGCGGGCATCCAACTCTACCA[A/G]GTGCACGCCCCTCATCCTTTTTATTGGAAGTGGCCCTCTTCTTGCTGTTTGATT	scaffold2824:23233	34014
SLG-2	iDAFWA214	0	74	AATTCTTGGCATGTTTATAATTATACAATTTGTGGGTCATTCTCTATACATACAATTCTTTATATTGTGTCATCTAACTAATCACTTCATGA-AATTCTTGGCATGTTTATAATTATACAATTTGTGGGTCATTCTCTATACATACAATTCTTTATATTGTGTCATCACTAATCACTTCATGACT	scaffold34623:6228-TA-i2	16717
SLG-2	iDAFWA849	0	62	AATTCATGTCATCTCCTTATGGGTGGTTTCATCTATTTACATTGTTGAGGTGGAGTGAAATGCACTCGAAGATGATGTCTATCATCATCACA-AATTCATGTCATCTCCTTATGGGTGGTTTCATCTATTTACATTGTTGAGGTGGAGTGAACTGTGCACTCGAAGAGGATGTCTATCATCATCA	scaffold2824:27715-TG-d2	34014
SLG-2	DAFWA2052	0	26	AATTCAGTTGACCTATAAACTTTGT[G/C]ACCAATTATGCCTAAACATGACTCATTCATGGTTATGGAAAGAAAACAATTTGAGGGTCTTGGGTT	scaffold12414:13993	16653
SLG-2	DAFWA5054	0	91	AATTCGCTCTCAAGCCGACCAATTATTCATCTTCTTCAAATTACTTTGTTAGGTAATTTATTTTTTCCTTACTCTTCTGATAATGGTCTC[T/C]T	scaffold16791:18692	31616
SLG-2	DAFWA1444	0	19	AATTCCCATAGTATGGCT[A/G]CATGTGCCAATTCTTTTCCTACAATATTGACTACAAGTGTCAGTTCTCGAAATTCCCACTTTGGCTACCTGTG	scaffold27265:23304	28951
SLG-2	DAFWA2716	0	10	AATTCAGGT[C/G]ACAAGTAATGTCTCTTTCTCTTTTTCTATCAATTACAAGTAACATGTAAAAGCAAAAATACACATATACACATAGACTATTC	scaffold37265:359	4409
SLG-2	DAFWA528	0	82	AATTCAATATTAGAAAACTAATGATATAAAATAAAGATAAAAAATGCGAGTTATTCAAACAAAATTTAATTAAAAATAGTA[A/G]CTAACTAGAA	scaffold5106:15098	64280
SLG-2	iDAFWA526	0	51	AATTCATAAAAATGTGAAAAAGAAAAGACTTCATCCTTTCTCTTTTATAAATCATAAGAATGAATATAAAAATGAAAATAATAATAATACAA-AATTCATAAAAATGTGAAAAAGAAAAGACTTCATCCTTTATCTTTTATAAAATCATAAGAATGAATATAAAAATGAAAATAATAATAATACA	scaffold43551:3460-A-d1	8891
SLG-2	iDAFWA336	0	70	AATTCAATATAGGTAGCTGTCTTTTTCCTTTTTTAAGCTTGTTAGAGCAATGATCTCTTTTTCTTTTTTTTGCCTTTTGTTTTATTATTAGT-AATTCAATATAGGTAGCTGTCTTTTTCCTTTTTTAAGCTTGTTAGAGCAATGATCTCTTTTTCTTTTTTTGCCTTTTGTTTTATTATTAGTT	scaffold92231:1062-T-i1	7675
SLG-2	DAFWA3539	0	55	AATTCATCTCAAAACCAAAAGAGAGAATCACCTCATGAAATTTGTGGTATCACT[A/G]ACGAGACGCCTATTTTAGCCCATAGATGGATTTTTTC	#N/A	#N/A
SLG-2	iDAFWA684	0	60	AATTCAAAGTTTCCATTAATTTGTATTTTTAATTATTTAGGAGTTCCCATAAGGAATTTTTACCTTGGATATTTCGAATAACTCATGGTTGG-AATTCAAAGTTTCCATTAATTTGTATTTTTAATTATTTAGGAGTTCCCATAAGGAAATTTACCTTGGATATTTCGAATAACTCATGGTTGGA	scaffold23789:301-T-i1	10705
SLG-2	iDAFWA687	0	60	AATTCACAATGCTCTTTGTTATTTAGAGGATGTGACATCTTCAATAGTTGGAGCATGATGACTAACTTCTTCATTGGCCATATCGGAAGTGC-AATTCACAATGCTCTTCGTTATTTAGAGGATGTGACATCTTCAATAGTTGGAGCATGATGCTAACTTCTTCATTGGCCATATCGGAAGTGCA	scaffold17124:1117-A-i1	2652
SLG-2	DAFWA4988	0	54	AATTCGTCATATGATAGGGCTGATGTGATTATGTTCTTAGCGCGTAGGTTGTA[C/T]TGAACCTTTTTGCGCTCCTCATCGGTCCACAAACTTTT	#N/A	#N/A
SLG-2	DAFWA5161	0	7	AATTCG[A/G]AGGACACCTATGTTGATTTTTTTGTACGGAACGCCCTCTAGGTGGGCTAGGTCGATGAGACAGGGGTGACCGCCTCTATTGATTT	scaffold13487:17232	19493
SLG-2	iDAFWA715	0	55	AATTCATATGTATTTGGTAATGAGGTATCTAGATTAGCAATTCTTAAATCTCTCTCTATATATACATAACATAACTAAATATATTTTTCATC-AATTCATATGTATTTGGTAATGAGGTATCTGGATTAGCAATTCTTAAATCTCTTTATATATACATAACATAACTAAATATATTTTTCATCAT	scaffold99339:141-CT-i2	6431
SLG-2	iDAFWA662	0	17	AATTCATATATATGATAGACACCCAACTTTATGCTAGAATTAAGATTGTGATGATTGGCCCATAAAATGAAATTGTTGAGAGAAAGCATCAA-AATTCATATATATGATAACACCCAACTTTATGCTAGAATTAAGATTGTGATGAGTGGCCCATAAAATGAAATTGTTGAGAGAAAGCATCAAC	scaffold2939:8531-G-i1	21713
SLG-2	iDAFWA215	0	25	AATTCAGTAAGAGGGAGATTTTTTTTGAAATCCTTCATAATTGATGGGAGAACATGACTAATTAACCTTGATAGATGATCCATTAAATACAT-AATTCAGTAAGAGGGAGATTTTTTTGAAATCCTTCATAATTGATGGGAGAACATGACTAATTAACCTTGATAGATGATCCATTAAATACATT	scaffold70757:5366-T-i1	13429
SLG-2	DAFWA47	0	25	AATTCTAAGAGAAAATTAGTAGAA[A/T]TTACCTAAGAAACTAGCTTGGAACTGTGGCCCCAAATTACAAGAATGGTAGAGAGAAGTATTTTTGA	scaffold12818:21191	48854
SLG-2	iDAFWA600	0	58	AATTCTTCTTACTTGAGTCACTTTCTATATATAGATATGTATATATATTGTGTGTATAACATGTAAGTATATATAAATGGAAAGTATTTATT-AATTCTTCTTACTTGAGTCACTTTCTATATATAGATATGTATATATATTGTGTGTATATATACATGTAAGTATATATAAATGGAAAATATTT	scaffold6039:208-TAT-d3	23645
SLG-2	iDAFWA688	0	41	AATTCATTAACAAAGAGAATTACACAAAGAAAGGATTGGTATCCTCCACCAGAACAATAAAAAAATACATAGGATTACAGAAGCATTCAAGC-AATTCATTAACTAAGAGAATTACACAAAGAAAGGATTGGTAATCCTCCACCAGAACAATAAAAAAATACATAGGATTACAGAAGCATTCAAG	scaffold10126:4606-A-d1	9904
SLG-2	DAFWA3931	0	92	AATTCTTTTGAGTATCTCAGTGTCAAAGTGCCAAGGAGATGTGGGACACTTTACAAGTGACTCACGAGGGCACTAGCGAGGTCAAGCGTGC[C/T]	#N/A	#N/A
SLG-2	iDAFWA62	0	42	AATTCAATTTTTTTTAAAAGTTTTGACATTATAGTTTTTTTTGAGATTTTTATCCACTGTGTTTGGGTTATAACATTTATAGGATCTTGTAT-AATTCAATTTTTTTTAAAAGTTTTGACATTATAGTTTTTTTTTGAGATTTTTATCCACTGTGTTTGGGTTATAACATTTATAGGATCTTGTA	scaffold17463:4479-T-d1	9417
SLG-2	DAFWA2860	0	15	AATTCTTCAAATGA[A/C]GAGTTTTGAAATTCTCTTCCATGATCACTTCTTATAGCAGTTATTTCTAGTGATTTTTCATTCTGAACTCTTTTAGC	scaffold10894:2860	48057
SLG-2	DAFWA8342	0	83	AATTCATTATGATAGGAGGTTTGATGAGAGACATGGTGACTCAAGTGGCCATGAAAGAAGGAGAAGGAGGAGACCTATATGG[T/G]AGAGGCCGA	#N/A	#N/A
SLG-2	DAFWA2662	0	56	AATTCTAATAAAGATTGACAGACATGGTTTGTTGCTCTTGTACCAAGAACCTATT[G/C]CTTGTTTTCACCAAACTCCTTAGTGAAAAATTCTTA	scaffold4909:9856	10205
SLG-2	DAFWA2465	0	53	AATTCCTCATTCTTATGTACTAAGAAGAGAGTCCAGGTATATCTAGAGAAAT[T/C]GTCTACTATAACAAGAGCATAGTAATTTCCACCAAAATG	#N/A	#N/A
SLG-2	DAFWA2862	0	46	AATTCGGTTTAGAGAAAGTGTGAGGAATGGAGTGTATGTGAGAAT[T/G]TGAATTTATGAATGAGAATGAATGTCTTTCTGCAAACAGCCAAGCT	scaffold3734:9038	31562
SLG-2	DAFWA3685	0	23	AATTCTAGGATATAAATTCTCT[G/A]TTTTTGCACATCAATTAACTCATACATATTCATGTTTACTTGTGAGTCTTGTATAAGGTTTTTAGCTGA	#N/A	#N/A
SLG-2	DAFWA6748	0	31	AATTCCTTAAAGTCAAAGTAAAAAAAACAA[A/G]AAAATTGATGCCTCATTCCAAAGTGAACAAGTTTCAAAAGGGTAGTGAAGTTTGACTATTT	scaffold74491:3483	5832
SLG-2	iDAFWA350	0	28	AATTCAATTTGGATTTGGCTAATAGTAGATGTAGAAGTGGCTATGATATAATTGAAATTGTGTTTATCTCATGACTGATGGTGAAGTTATGA-AATTCAATTTGGATTTGGCTAATAGTAGTAGAAGTGGCTATGATATAATTGAAATTGTGTTTATCTCATGACTGATGGTGAAGTTATGATAA	scaffold10347:3898-ATG-i3	13389
SLG-2	DAFWA2135	0	60	AATTCTGGTTAGAAGAAGTACAATTTTTGGGTCATGTATTCACACAAGATGGTGTTGTT[A/G]TTGACCCCATAATGGTAGAAGAAGTCATACAA	scaffold8524:21884	24847
SLG-2	DAFWA3387	0	18	AATTCTCGGCCAGGGTG[C/T]TTGGATGTGGCGCATCAGACTTGGCCAATGAGCTTTGACAAAGTGCACCAAACTTAGCCTAGAAGCTTGGACGA	scaffold40229:3720	16590
SLG-2	DAFWA4458	0	89	AATTCTTCTCGATTATTAATTGCACCTTTATGACATGACTTTTAAACTTTTAAGTCGGTTGAGAACATGTTTATTATTGATTTGTCTT[C/T]TGT	scaffold74341:7956	8466
SLG-2	DAFWA7191	0	20	AATTCTTTGTTAGATATTT[T/C]CTGATAATTGGTGAAATACTAATCCTAGGATCTTGAATCTCATGATTCTCACACACATATATGAAACAAAGG	scaffold29302:9807	14453
SLG-2	DAFWA4163	0	18	AATTCATTGTGAGCCTT[T/C]AAAAGTGATGCTTCAATTAGTTGACATATCAAACAACTTGTTTCCTAACCAAGTGATGTTAACTTTCCTCTTTC	scaffold3657:22487	24107
SLG-2	DAFWA7013	0	31	AATTCTATTAGGGTTTTCGACATTCTCAAT[C/T]GCAAACCTAATAAATGATTTCACTTCATCCTCATACTCCTTCATCAATTTATTGACACTCA	scaffold18555:25842	26911
SLG-2	DAFWA8006	0	38	AATTCAAATGAGTTGAGCAAGTCTTCCAAGCCAAGTT[T/G]CACCACACATACACTGTCAGCCTTGACCTGGTCATGCCCATGCCTAGCTGCTTG	scaffold297:3149	6168
SLG-2	DAFWA2758	0	90	AATTCAAGAGGAGAAAGGAGATGCCAAATGTGATACAAAAATATAATTTTGTAATCTCATTTGGTTCCAAAAGCATCTCATCAATGGAA[A/G]AG
SLG-2	DAFWA8425	0	10	AATTCTTCT[A/G]CATCAGATAAGCGAGCTTAATCCACGCGCAATGCTAATGAGGGAGGGGACGACCAAGAGTCTGCCTCGAAGCATCATGGTGT	scaffold22605:5635	7102
SLG-2	DAFWA6085	0	61	AATTCAAAATGGCTAAATGAAGAACAATTGTGGCATGATTACATGATTTAAAAATGCATA[A/G]CATATCTTGACTTATGCTTTTATTGAGCAAA	scaffold8372:15633	19959
SLG-2	DAFWA4235	0	70	AATTCTTATAGATGAAGCAAGAGGATATGAGTGTGGACAATATGTAGCAAAATTTGAGGAACTCTCGAA[A/G]TTTTCCAGGTACATAGTAAACC	scaffold21036:21679	26794
SLG-2	DAFWA6909	0	19	AATTCAGTTTGCAACAAA[T/A]TTTCTCATTTTAAACACTTAAAAATAGAATTGCGATAGAAGTAGATATATGAAGAACAATCATTGTAGAATTT	scaffold10356:37563	56280
SLG-2	DAFWA8358	0	32	AATTCACAGCAATTATCTTCACATCAGATAT[G/A]TCGATCTCCAAATGATCAATGACATGAGAGATAAATATTCCATAAGCCAACAATCTCGAA	scaffold2084:46639	55558
SLG-2	DAFWA5096	0	13	AATTCTATTTAC[G/A]ACTTGTAAACACATCAAACAACAAAGTAACCTTTCTCCCCGTTTTGACATTATCAAAAAGATAAACTAATCAATCTAGT	scaffold12818:45361	48854
SLG-2	DAFWA6911	0	14	AATTCCCTGATTC[A/G]TCATTTCTTTTTTAGGAATTGTGATCATATGGTTCCTCTTCACTAGTGACATGATTGTTAATGCTGTAACTTTTAGAT	scaffold19142:8855	12870
SLG-2	DAFWA6803	0	31	AATTCTATGCTTTAGGATTGAGAGGCATTT[C/A]ATGTTTAATTTCTCATCATTTCATCTCACATGTTCATGCATTCATTGATGTTTTTTTTGTG
SLG-2	DAFWA7011	0	65	AATTCTTAGTTTCTCTTTTACCATGCTATGTACGAAAATGCTTTGTTAGTAGTTTACTTTCTTG[T/C]CGGGATTGCTTTATTTATTCATCTATG	scaffold21036:19487	26794
SLG-2	DAFWA5615	0	6	AATTC[C/T]AGTAGCAAACATCTCAATTTTCACTAACTTTAATCGATTAAGATTTCTTTTAATTGATTACCTGGCCTCATTTTTCTGAAAATATG
SLG-2	DAFWA3613	0	80	AATTCTATGATCAATTTCAGACAAGGGAATGGTGTTCATGAGGTTAGGGTTTGTAAAGACGTAACCCAGAACTGTTGCA[G/T]AATCTGTTTTAT	scaffold17955:4477	8118
SLG-2	DAFWA1827	0	54	AATTCAAAATGCAGTAGATATAATTTATAATTATTTATGAAATTATCTTCAAA[G/T]TGATTAATGAAAATTTTCAAATATATAGTAATTAATGA	scaffold6949:293	17096
SLG-2	DAFWA2032	0	52	AATTCCTATATTCTTTCTCAAGTCTTTAAACCTATCTATCTTCAATGTCCG[C/T]CAATTGAAGCTCACTCTTGCAATGTATGAGCTCAATTCTT	scaffold51657:1872	3812
SLG-2	DAFWA1956	0	48	AATTCTAAGTAAAATTAACAAGAACTTACCTAGAACTAGCTTAGAAC[T/C]GAGGCTACAATATCTAGAGAGAAGAAGTGAAGAAGAAGAATGAA
SLG-2	DAFWA6544	0	88	AATTCAAGTCAAAGAAAGCATACATCGTCTGGGATGTACCGGAGGAAGAAACAACATCAAGCACCTCGGATGAAGAGGAGACCGCTA[C/T]GCTG	scaffold7983:6622	9736
SLG-2	DAFWA1527	0	85	AATTCCCGAACAAAACATATTGATATAGGGCATCACTTGCTCAGGGACAATGTCCAAAAGAAGAATGTACTCTTAGAGTTTGTT[A/G]ATACACA	scaffold18245:2670	11942
SLG-2	DAFWA6162	0	47	AATTCAAGTATTCCACCTTGCCTAGGTGGTGGCCTTCTCTGGTGTT[A/G]ACTCTTTTGATCATTTAACGCCATGGATTCGATGATATTAATGGC	scaffold51436:2248	3890
SLG-2	DAFWA442	0	27	AATTCTATATGTTTATTCCTTCAATT[C/T]ATACACATAATAACTTCTATCTATTTCCAAGGAAGAGATTAGTAGAAAAGATATGAATTTACAAA	scaffold12818:29014	48854
SLG-2	DAFWA5416	0	51	AATTCTAGACCATTGTCAGTTCTCAGTCTCTTGATCTTTCTCCCGGTTTG[T/C]TTTTCGATCAATGTTTTCTACTATTTGAACTTGACAAATGC
SLG-2	DAFWA5352	0	52	AATTCTGTTGAATCTTGGAAGAGAAAGATAATAATTATTGTAGAGAATGCG[T/C]AGCGGTGACCAGAGCCTTCAGGATGAAGGCTCTGGTACAA	scaffold68712:4786	9777
SLG-2	DAFWA28	0	86	AATTCAAGAGGAGAAAGGAGTTGGTGAATGTGATGCAAAAGTTAATTTTGTAATATCATTTGGTTCCAAAAGCATCTCATCCTTT[G/A]ATAGAT	scaffold11731:23092	35036
SLG-2	DAFWA2477	0	81	AATTCCATATATCCAAGTCTTGAGATTCTATGAAGATTCTCATTCTGATTTTCCAGAAATCATAGCACTCTCCAACAATG[C/T]TTGGAGGGTTG
SLG-2	DAFWA8826	0	69	AATTCCCTTAAAAGTATTTGCACTAATTTCAAGCAATTGTATATAATTAAAGCGTTCAAAAATGACTT[T/C]TTTATTTTAATTGTAGTGTCCTT	scaffold21988:7026	8540
SLG-2	DAFWA432	0	72	AATTCTAAGGCAACCACCTTAACGTTCTTCTCCTCATTGTAAGAATTACAATTAATCACTTGTTCAATTTT[T/C]AATTCCCACTCAAAGTAAGC	scaffold14979:1751	4156
SLG-2	DAFWA2768	0	47	AATTCCAAAAATTAATTGATTGATTACAATTTTGATTTCATTATAT[A/G]ACTCTTATAACTTTTGATGAGATTGATTCATTTATCTTTTTGATA	scaffold8653:1603	3487
SLG-2	DAFWA1831	0	57	AATTCTTTAATTTTGTACGTGATTACCACATAGCCGAACTAACAATTCCAGCAAAA[C/A]GTTACCACATCTTCCACTATGTGATTGCTTTTAGC	scaffold2084:25814	55558
SLG-2	DAFWA6641	0	52	AATTCAATTTTTTTTGCTCAAGGGGGCTTATCAAAGGATGATCCTATTTTT[T/G]GTTAGACTTTTGGGCCATTTTTGGTTCAACTAAAGAATAA
SLG-2	DAFWA4112	0	73	AATTCTGTATAAATAATCTGCTACATATACACTTTGATAACATAGCAGAAAAATCAGTCATATTCTCCCAAC[T/A]ATTAATCCCCTCTTAGTTG	scaffold57042:5159	8202
SLG-2	DAFWA936	0	59	AATTCTGATTTGGTCTAAGTATGAGAAGGAAATCAATCCTCCAGACTTTGTAGTTCAC[G/T]CCCCTTTCAAGAAAGGAAAGGCAATCATGTCTC	C27261674:74	134
SLG-2	DAFWA2574	0	84	AATTCAAGAAAGAAGCATCTAGAGTCCTCAAATTCAATTGGTGTATGTGACAATACAAAGTGTTCAATATAGTGAAGATAAAT[C/T]TCACAAGA	scaffold10894:11655	48057
SLG-2	DAFWA6561	0	50	AATTCCAAACAGCTGACATACTGACTAAACCTCTTCCAAACAATCAATT[T/C]CTTACTTTAAGGAATCAACTCAGAGTTCAGGATTCTGGCACA	scaffold27185:22504	29501
SLG-2	DAFWA4466	0	26	AATTCCTAGTTGTCTTCTTAATATG[A/G]AGAAAGTATCTCTAGGAGGTGGCTTGGTGAAGATATCCACTAGTGGCTTTGAAGTTTCTAAAACTT	scaffold85850:684	7883
SLG-2	DAFWA6597	0	20	AATTCCTTATGAGCATCAC[C/T]TTGAGCAACTACAAATTGGGGCTTCAAATGTGCCTCACGAACCACCATTTGGGTTAGCTCATCTAGACGCTT	scaffold16366:29214	44605
SLG-2	DAFWA2501	0	16	AATTCATAGTCTTTA[T/A]CCGCACAATTTGGTGTGCAAAGTCACTCGGCGAATTTTCTGTTATTCAAGGATAATTCTCGGGGTATGTTGGTATC	scaffold16091:3398	27111
SLG-2	DAFWA5446	0	38	AATTCCTAGTTCTCTCCTTAGAACATAGAAAGTATCC[A/C]TGGGAAGGGGCTTGGTGAAAATACCTGCTAACTGTTTAGATGTTTCCACAAAAT
SLG-2	DAFWA1985	0	6	AATTC[G/C]GTAAGAAAATATATCAATTTTCTTATTCCAATACATGTATCTGAATTTAATTGATAAATGTTTTCATTTATTTTGGTGGATGAGGC	scaffold95215:299	903
SLG-2	DAFWA6746	0	36	AATTCAAAACGCATATCCGTGTTATGGGAATGATA[A/C]AATGTTACCAATAGGCTATAGTGGTTATATGTATTTATATGTGGATATAAATAATA	scaffold37506:8714	9656
SLG-2	DAFWA5996	0	28	AATTCTAAACCAACGAACACATAAAAG[T/C]AGAAGCAAAAAAGATCAAGTGACCTCCCGCCATTGTTGCGTTTTCTAGCAAGCTTCGGACTGCG	scaffold44095:8081	16149
SLG-2	DAFWA4013	0	85	AATTCTTTGATTTATAATTATCACCCATTTTAGTTCATTATGATGTTACTACCATATAGGTTCAACTTGGTCATTGTGAATTTT[A/C]TAGTTTA	scaffold14271:4608	9607
SLG-2	DAFWA2239	0	44	AATTCATCATAGGAAAATGCAGACATAATAATGAGGTTTCACC[A/T]TATCAGTCCAAAGACTCTTTGGTTCTTCATTAGTTTCACCTTCCACTA	scaffold43580:8970	14025
SLG-2	DAFWA1407	0	20	AATTCTGATTTATACAGTT[C/G]GATATGCTCTTCATGGCTGATTGTTTATTCTTTTTATAACATTTCTTTAATGTTGTCAATGCTTGTGAAATA	scaffold16091:13903	27111
SLG-2	DAFWA7021	0	31	AATTCCCTCGGTAGAATGGTGAATTATGAT[G/A]AGTTAAAAGGCCTAAAATGTTGTTGGTATGAAGTTGTCCAGCAAACCAAGCCTCCAACATC	scaffold43464:5047	6425
SLG-2	DAFWA4609	0	67	AATTCTAGAGCTTTTATCATGCCAACTTTAATCAAGACCTAGTACACCACCATAAGGTTGTGACCT[C/T]TAGACCATTCAAAACCTTGTAAGTG	scaffold9554:15309	25323
SLG-2	DAFWA6683	0	67	AATTCATCTTTACTAATAACATGTTTAGTTGCAAACGATAATCATGATGCATGGATATGACATAGG[G/A]GAATTTCTCATACTCACATGGACCA
SLG-2	DAFWA3971	0	26	AATTCCAGGCTTGAGACTCCAAGTT[T/C]CTATGGAGCAAACCAACCTCATATCCTCCAAGGATGAGAATGAAAACTCGTAGAACCCCTTCCCAA	scaffold98807:1577	8310
SLG-2	DAFWA2700	0	16	AATTCCTAGATGAGA[A/G]AATTTTGGCCTTCAAGTGTTTTTTAGAGGATTTTATGAAGAAATGGTATATTCCAATCTGTTTTGCTCGAAGGAAT
SLG-2	DAFWA8303	0	19	AATTCTGTGATGATCTTG[G/A]CATTAGTCATAATTTTTTCTGCTCCTAGAATACCACAACAAAATGGTGTTGAAGAGAGAAAGAATCGGTCTTT
SLG-2	DAFWA3229	0	88	AATTCTTTCTTTCACAAGCGTGTGATAAGAAAGGGGATAGAGTCACTTGGAAATGGTGTTTTCCAACAGTGACATAAGTATTAGTGA[A/G]TGAG
SLG-2	DAFWA8340	0	47	AATTCAAGGCTTGATGGAGGAGTATATTCTAGTGTTTGAATAGTTA[G/T]ATGTTTAGAAGTTTAATGTTGTTTGTAGATTTCTAATTATGGGGG	scaffold51657:1966	3812
SLG-2	DAFWA7525	0	9	AATTCCTT[A/G]GAAATACCTTAGAATCCTTTTGGCAGCAAATCAGTGTTGTTCAAGAGGATGACTCATATACTGGCACACTTAGTTTACACTGT	scaffold77032:1608	3703
SLG-2	DAFWA2786	0	82	AATTCTCTTCATAATCAAAAGGGTGGTATAATTGAGACTTTCCATAAGGATCTAAGGCCGTCAATCATCATCAAAGCAAGA[T/G]GATTTCTTTG	scaffold51191:10402	18980
SLG-2	DAFWA4405	0	44	AATTCACACAACCCCTTCTCTCTTCATTTTTTATTTACTTGGA[C/T]AATGGCAGAAAGGCTATAAATGATAAAGGAAACAAATATGGAACATAT	scaffold2734:31276	33808
SLG-2	DAFWA7668	0	88	AATTCACAAAGGTTTACTTGAGACTGCTCACTAACTATACACACTTGATTCAGCAATACTTATTCATCTAGCTATGATTTTTCACAA[C/T]AATG	scaffold10341:12314	14593
SLG-2	DAFWA1940	0	7	AATTCT[T/G]GATGAATCATATCTTATTTAGTTGTTTCTATGTTTTTTAATTTAATGAATTATTTTTGTTCTTTATTCAAATGCCTATATTTTTT	scaffold85850:712	7883
SLG-2	DAFWA2253	0	72	AATTCTATGTCTATTTTTTTACCACAAGGTGTCATAGGTCTAGATTTCTTCCTAGTTAGTTTCTCTTCCTG[A/G]TCTATTTATTGACAACCGAA	scaffold74268:20912	24235
SLG-2	DAFWA5732	0	84	AATTCTTTATCTCACTTTAATGTTTAGTTTCAAAGTATTAGGAATTGGTTTTCAAAAAAAATAAAAAGTATAACCGTGTTTTA[C/T]GTATTTTG
SLG-2	DAFWA6800	0	23	AATTCTACAGCGTCTTCGGCCA[C/A]ATAACTAAACACTACACACAATTATGAGACACAATAAAGGACCTTATACAAGTCGACCACTTACAACAC	scaffold15581:17887	21773
SLG-2	DAFWA6314	0	57	AATTCATTGAATGAAATTCCCTTTTAAATTATGGAATAGTGAGGGCACAACAAGTA[T/G]TCACATACTTGTGATTAACAATAATGATAATAACG	scaffold27265:26203	28951
SLG-2	DAFWA8563	0	53	AATTCTACACAAGAATCTCCACCTTAGTGAATATATGACTTCACATTGTTCA[T/A]TGTCTAATTCTCTTTAAATGTTTCCCTACATCATAGACC	scaffold21361:1072	5440
SLG-2	DAFWA4658	0	12	AATTCTTAACC[C/T]TGTCACCATTACCAATTCTAGCACCATTGGTGGACAAACCTCCTACATTCATGAAAATATCCTCACTCAGCTCAAACTGT	scaffold70170:1768	2336
SLG-2	DAFWA6714	0	68	AATTCCACAGCATGCTCAACCATATGATAGATGACTGCACCTAGCTGTATGACACCATTGAAGACTT[T/G]ATACAAGTTGGCCACCTACACCAC	scaffold16791:8086	31616
SLG-2	DAFWA4810	0	32	AATTCATCCTCTGATGACTCATATTTGTTAA[G/C]TTTTGCTTTTAGAGAGATATTCTTATTTTTCTTCTCCTGTTCTTCATGTTGATCCAGTTG	scaffold71545:1009	1523
SLG-2	DAFWA8244	0	92	AATTCTTTTCAGTTAAGTTTGAGAGTGTAGAGGGAACTGATTCATGTTTTAGATATTTAAACTGTAGTATCTATTTAACAGCGCATATAAA[T/C]	scaffold5106:2324	64280
SLG-2	DAFWA8437	0	24	AATTCGGAAATCAATGAGCAGTT[A/C]CACATTTACAAGCAACTTTTGCTTTACGTTGAAAGGAAACTTCTAGCAACCTCACTCAACTTCCTTTC	scaffold58843:465	4060
SLG-2	DAFWA4153	0	80	AATTCCCATTCAAAGTAAGTCTCTAGATCATTCTTTCCATTAAAGGTTGGCACCTTTATTTTGATCCCCTCTAACTTAT[A/C]ATCATCCCTTCT	scaffold5106:49093	64280
SLG-2	DAFWA7375	0	72	AATTCTCTTTCGATCCAGAATTAGAAAAAACCTTGAGAAAGAAGAAGAAAGCACAAAAAAAAGCTAGACAA[G/A]CCCAATCTATTCCAAAGGTA	scaffold12818:29108	48854
SLG-2	DAFWA900	0	53	AATTCCATTCCATCATTGTTTCCATTTTAGTAGGGTCCACATCAATTCCTTT[T/G]CTTGATATCACATGCCCGAGAAAATTCACCGATTCCAGC	scaffold8601:18183	24882
SLG-2	DAFWA7250	0	12	AATTCACAGTA[T/G]TTGGACCTGTCTTGGTTTCTTGTTCTTTTATTCGGATTAGGCTTGGAAAGCTGGAAGAGGTGTATGGCCATGACCTCTTG	scaffold15581:17857	21773
SLG-2	DAFWA8370	0	64	AATTCAACTTCTGATAATGGAAACAAAGAAAACTAACAAAGTGGTTTTTCTGCTAGTGCTAAT[T/A]ATAGAAGCTAAATATATTGCAACTCTGA	scaffold8089:5025	19135
SLG-2	DAFWA3820	0	75	AATTCATAAAGATATGTAATAAATTATAAATAATATATGAGACCTAAATAAGAATGAGATTAATATTCTCTGAT[G/C]GAGATGCATTTAGTCTT	scaffold90213:4724	5632
SLG-2	DAFWA7517	0	54	AATTCAAAGCTTTTATTGATAATGCCAATCTCCTTCATCTTCCTACAAGAGGG[C/G]CTCCTTTCACCTGGTCTAATAGGAGAACAGGGTCTGCT
SLG-2	DAFWA2826	0	89	AATTCCCACTTGGATTGGAAACCCAAGGAGCAAACAAATTTCAGGAATTAAGAGGTAAAATTTATCCATCGCTCGTTAGGTAATTCTA[C/T]AGT	scaffold14302:3754	27839
SLG-2	DAFWA8266	0	46	AATTCAAACTTCATGTTACTGTGGCCAATTTTATTCATTCTTGCC[A/C]CGTTAGTCCATCTTGTGGAGTTTGTTGAAGTTAGGTGGATCTTGTG	scaffold27778:6065	11459
SLG-2	DAFWA1711	0	80	AATTCTTCCCTTGTTGTTGTCGCCATATGTGACATATCCTTTGCCCCTTGGAGTAAGGACGGAGAATTTACTTTTATCG[T/C]TCGTCATGTGTT	scaffold70757:100	13429
SLG-2	DAFWA2924	0	69	AATTCAAGGAAAGAGGTAAATCATTTTCGTCGATAGTAGTCAATATCAAAGCTCCTCCAGAGAATGCT[T/A]TTTTCACCACGAAGGGTCCTTCA	scaffold33932:152	2228
SLG-2	DAFWA8837	0	7	AATTCA[A/G]AAGATGATAAATTAAAGAGAAGAAATTACACCATAATCCAAGTCAATTTGTAGGAGCATGAGCCATCTATCCAATGATGAGATGA
SLG-2	DAFWA3324	0	56	AATTCATCATATGACAAGGTCGATGTGATGATGTTTTTAGCATGTAGGTTATATT[G/C]AACATTTTTAAGTTCATCGTCGGTCCATAAACTCTT	scaffold3734:28870	31562
SLG-2	DAFWA6698	0	55	AATTCAGATTGTGTTGTTGCCTCAGAGATTTAGAAAGAAAAGGGGATAGAGAGG[G/A]TTTGAAAAAATGACAAAAACGCTATTGGTTCTACTTT	scaffold17727:1856	16553
SLG-2	DAFWA5034	0	6	AATTC[T/C]AGTTTCTTCGTCATTAGTCATCTTAAGATCCATAATAGTATGATCTTCTTGATAGTTCCAATCTCCACCATATTTTTAAATCCCCA	scaffold16366:29193	44605
SLG-2	DAFWA1213	0	42	AATTCAAAGGTACTTAATAATTATGTAATAGGGGATTGCTT[C/T]GATACCATTGTATCGGCGTTAGAATTTATTCTAACAAAGCCGAGATAGGG
SLG-2	DAFWA1471	0	7	AATTCC[C/T]ATGAAATCACCATTGGTAAGGTATCTGATACAAAAATCAAGAGCTTCATCAACAATATATCGCTCGACAATACAACCCTCTGGTC	scaffold47531:6380	6687
SLG-2	DAFWA4075	0	56	AATTCTTATCCAAAAAGAAGAATAAAACTCACCCTCTACCCACATTGTACTTCAT[A/T]TCATCTCATTCCCTCTCAAATTGGTCAAGGAAGCCC
SLG-2	DAFWA7283	0	23	AATTCTGTGGAGGTTTATAAAG[T/C]CGAGATCAGAGTTTAGAACCATGTGAAAAACAAAGATTGGTTCTCTTGATGTGTTAGTACATATAATCA	scaffold5106:28157	64280
SLG-2	DAFWA1009	0	90	AATTCAAATTATTTCCTTCAAAAAGGAAACAATTGAACACGCCTAGCACCCATAAGGAAACTTACCACACGGTTTCCCCATACTTCTCA[A/T]GG	scaffold5916:1453	17496
SLG-2	DAFWA4604	0	84	AATTCTGTGATTTGTGCTAAGTGTTAATAATCTGTGTATAATCAAGAATCAATTTAGGACAATAAAAATAGGTAATTATCATT[A/G]TTTGCATT	scaffold37444:5782	24743
SLG-2	DAFWA4630	0	87	AATTCCCGAACGAGCGAAGTATATATTTTACCTTTTAATTCTAGAAACTTGTTCGCTCCTTGGGTTTCCAAACCATATGGGAAATC[A/G]AATCC	scaffold27265:10288	28951
SLG-2	DAFWA8797	0	67	AATTCAACATTCTTGAATATACTTTGATTCAGTATTGAATAGAACAACCCTTTCGCTTCTTTGATC[T/G]GTGTTGAGAATTGAAAATTCAATGG	scaffold29446:13776	24490
SLG-2	DAFWA6948	0	91	AATTCTAAGAGAAAATTACAAAATTAGCTAAGATCCAATAATATCCTATCATATCCTATCCCATCATATCCTATCCTATCCTATCTTATC[C/T]T	scaffold79856:5768	9801
SLG-2	DAFWA557	0	21	AATTCTTGGAAACCTTTGAA[C/A]ATTTAATTTTATTGAAATAAACTGAAATATGTTAAATTTTAATCTCATATAAGTCATATTCATATATATCT	scaffold6112:2128	5962
SLG-2	DAFWA5599	0	72	AATTCACCATTCACATCCTACACCGAAATGTTTACAATGACCAACATATCTATCTGGCTGTGACTTTACAA[T/C]AGTATAGTCAAATGATTTAT	scaffold27778:11081	11459
SLG-2	DAFWA5908	0	55	AATTCCTGAAACGGACTAGGCTTACCACGTAATAGATATTGTTACTTGCCATTG[T/A]TAAGGAAATCTGTACTCCTGGTTGCTTTCCCATAGGG	scaffold8524:16078	24847
SLG-2	DAFWA8819	0	60	AATTCTACTCCTACTTTCATCCTTAATGAGTACAATAGAAACTTATTAGGCTTTTCTAA[C/T]TATAGATTTAGGAACTTGTAACTTGTATGAAC	scaffold98807:6628	8310
SLG-2	DAFWA5092	0	87	AATTCTGCTTTTGATAGCTCATCGTGATAATAAATCATCAGCCTCCATTAATCATGTGTTGTTGAATAAATGTAAATTAACAATGC[G/A]TTCTC	scaffold43241:17316	18176
SLG-2	DAFWA672	0	87	AATTCAAGGAGTAAGACATAGTGTGATGGGACCAATTTAAGAAGGATAGGTGTATGTGTGGTGCTAAACCTGTTGACACTTGGGAA[G/A]AGATG	scaffold51191:11927	18980
SLG-2	DAFWA2137	0	8	AATTCTA[G/C]ACATGCTTATTTACCTACATTAAAAACACAAATAATGAGTAGCATGTAATTCTTCTTCAATCTGGTTCTTCCTTGTATAACTCC	scaffold5106:46418	64280
SLG-2	DAFWA8706	0	63	AATTCGAGAGTTGGAAGTGAAATAAATTTTGAAAAGGGTGCATAATAACAAAACAATTGAAC[T/C]AAATGATATACCAATTGGGGATTGGAAGG	scaffold33137:17350	21493
SLG-2	DAFWA1415	0	84	AATTCAGAACTAACACAATCTATGCTTGAACTGCATCGTTAGAATTTTATTTTTTCTAAGGCTTGATAAATTTATTATGAGGA[T/A]ATGTTTAG	scaffold86499:535	7932
SLG-2	DAFWA2164	0	70	AATTCTCTCCTTGGACAAAGGGGATCCTAGGCCAAGAAATAATGCACTCGTGTGCCATTATGGAGTCAA[C/T]AACTCCTAATTCCACCATGTGC	scaffold2979:8027	24294
SLG-2	DAFWA1696	0	50	AATTCAATGAAGAAAATATTTTTTTTCCTTTTATTTCCTTTCAAAATCT[G/A]GGTCATTTTGCCAAATCAAAAGTTGACATGATTTCAAAGAAG	scaffold6655:2769	25107
SLG-2	DAFWA5330	0	62	AATTCTTTAAAGGTAGAAAACCAAAAAATTCTCATTTGCATGTATTTGGTTGTAAATGCTT[C/T]GTTTTAAATAATGGTAAGGATAACTTAGGC
SLG-2	DAFWA8754	0	92	AATTCAGTGTTCATCCTCAATTGCTTCATCAATTTTGGAGGGTTCGATTTGAGAGACGAAGGCCATGTTAAGACAAGTTTTATAAAGCATT[T/C]	scaffold32472:2149	3067
[truncated: 6,251 more rows]
