# Supplementary material for: Draft Genome Sequence, and a Sequence-Defined Genetic Linkage Map of the Legume Crop Species Lupinus angustifolius L
Source: PLoS One. 2013 May 29;8(5):e64799. doi: 10.1371/journal.pone.0064799 (PMC3667174; doi:10.1371/journal.pone.0064799)
Supplement: Table S4 — Validation of SNP marker DAFWA213 linked to the R gene Lanr1 conferring resistance to anthracnose disease using Fluidigm SNP genotyping platform. R = presence of the R gene Lanr1, S = absence of R gene Lanr1. Presence or absence of the R gene Lanr1 on cultivars is adapted from You et al. [38]. Genotype A:A = homozygous genotype of the marker DAFWA213 linked to the disease resistance allele; G:G = homozygous genotype of the marker DAFWA213 linked to the disease susceptible allele. (XLSX) [file pone.0064799.s007.xlsx]

## Sheet: Sheet1
Table S4 Validation of SNP marker DAFWA213 linked to the R gene Lanr1 conferring resistance to anthracnose disease on Australian historical and current commercial cultivars using Fluidigm SNP genotyping platform.
R = presence of the R gene Lanr1, S = absence of R gene Lanr1
Presence or absence of the R gene Lanr1 on cultivars is adapted from You et al. [38].
Genotype A:A = homozygous genotype of the marker DAFWA213 linked to the disease resistance allele, G:G = homozygous genotype of the marker DAFWA213 linked to the disease susceptible allele
	Cultivar	Year of Release	Presence of R gene Lanr1	Genotype of SNP marker DAFWA213
1	Uniwhite	1967	S	G:G
2	Uniharvest	1971	S	G:G
3	Unicrop	1973	S	G:G
4	Marri	1976	S	G:G
5	Illyarrie	1979	S	G:G
6	Yandee	1980	S	G:G
7	Chittick	1982	S	G:G
8	Danja	1986	S	G:G
9	Geebung	1987	S	G:G
10	Gungurru	1988	S	G:G
11	Yorrel	1989	S	G:G
12	Warrah	1989	S	G:G
13	Merrit	1991	S	G:G
14	Myallie	1995	S	G:G
15	Kalya	1996	S	G:G
16	Wonga	1996	R	A:A
17	Belara	1997	S	G:G
18	Tallerack	1997	S	G:G
19	Tanjil	1998	R	A:A
20	Moonah	1998	S	G:G
21	Quilinock	1999	S	G:G
22	Jindalee	2000	S	G:G
23	Mandelup	2004	S	G:G
24	Coromup	2006	S	G:G
25	Jenabillup	2007	S	G:G
26	Gunyidi	2011	R	A:A
